# Supplementary material for: Combined Transcriptomic and Metabolomic Analyses of Defense Mechanisms against Phytoplasma Infection in Camptotheca acuminata Decne
Source: MDPI journal article supplement (doi:10.3390/agriculture13101943), 2023-10-05
Supplement: s1 [file s1]

Archive with 2 entries (2 files):
- Additional file S1.xlsx
- Additional file S2.pdf
