# Supplementary material for: Combined Transcriptomic and Metabolomic Analyses of Defense Mechanisms against Phytoplasma Infection in Camptotheca acuminata Decne
Source: MDPI journal article supplement (doi:10.3390/agriculture13101943), 2023-10-05
Supplement: s1 [file s1 › Additional file S1.xlsx]

## Sheet: Supplementary Table S1
Supplementary Table S1. Summary of transcriptome sequencing of infected and noninfected C. acuminatatissues.
Sample	Raw Reads	Clean Reads	Clean Base(G)	Error Rate(%)	Q20(%)	Q30(%)	GC Content(%)
C1_1	44948002	44876954	6.73	0.03	96.93	91.96	45.02
C1_2	46448226	46402784	6.96	0.03	97.76	93.59	45.32
C1_3	46492404	46418984	6.96	0.03	97.35	92.82	45.31
C2_1	49209222	49100206	7.37	0.03	97.26	92.87	44.76
C2_2	47201546	47130748	7.07	0.02	98.3	95.05	45.8
C2_3	41923592	37725784	5.66	0.03	97.01	92.31	44.93
C3_1	49046388	48997176	7.35	0.02	98.41	95.2	44.68
C3_2	46306540	46179828	6.93	0.03	97.81	93.95	45.6
C3_3	47126114	47054630	7.06	0.03	97.29	92.73	44.57
D4_1	44085456	44018818	6.6	0.03	97.57	93.33	45.5
D4_2	47353384	47291740	7.09	0.03	97.59	93.29	45.63
D4_3	46682740	46628162	6.99	0.03	97.65	93.41	45.4
D16_1	45956166	45896260	6.88	0.03	97.58	93.24	45
D16_2	43481726	43435946	6.52	0.02	98.39	95.04	44.93
D16_3	46338490	46260420	6.94	0.03	97.26	92.44	45.04
D28_1	45620380	45551734	6.83	0.02	98.35	95	45.14
D28_2	44508292	44457330	6.67	0.03	97.85	93.9	44.9
D28_3	43384974	43329214	6.5	0.03	97.77	93.71	45.21

## Sheet: Supplementary Table S2
Supplementary Table S2. Summary of reads and reference genome comparison statistics.
sample	total_reads	total_map	unique_map	multi_map	read1_map	read2_map	positive_map	negative_map	splice_map	unsplice_map	proper_map
C1_1	44876954	40692255(90.68%)	39775995(88.63%)	916260(2.04%)	19978157(44.52%)	19797838(44.12%)	19846975(44.23%)	19929020(44.41%)	14086573(31.39%)	25689422(57.24%)	37676436(83.95%)
C1_2	46402784	43298507(93.31%)	42296590(91.15%)	1001917(2.16%)	21191221(45.67%)	21105369(45.48%)	21115919(45.51%)	21180671(45.65%)	15536425(33.48%)	26760165(57.67%)	40511338(87.3%)
C1_3	46418984	42394679(91.33%)	41357162(89.1%)	1037517(2.24%)	20733782(44.67%)	20623380(44.43%)	20641754(44.47%)	20715408(44.63%)	14888840(32.07%)	26468322(57.02%)	39478610(85.05%)
C2_1	49100206	43162823(87.91%)	42168823(85.88%)	994000(2.02%)	21139251(43.05%)	21029572(42.83%)	21044274(42.86%)	21124549(43.02%)	14107866(28.73%)	28060957(57.15%)	40629758(82.75%)
C2_2	47130748	41040296(87.08%)	40133484(85.15%)	906812(1.92%)	20103349(42.65%)	20030135(42.5%)	20033886(42.51%)	20099598(42.65%)	13592444(28.84%)	26541040(56.31%)	38979248(82.7%)
C2_3	37725784	33221688(88.06%)	32490182(86.12%)	731506(1.94%)	16294078(43.19%)	16196104(42.93%)	16203591(42.95%)	16286591(43.17%)	10486717(27.8%)	22003465(58.32%)	31353762(83.11%)
C3_1	48997176	43882344(89.56%)	42786664(87.32%)	1095680(2.24%)	21423330(43.72%)	21363334(43.6%)	21373696(43.62%)	21412968(43.7%)	15325582(31.28%)	27461082(56.05%)	40425370(82.51%)
C3_2	46179828	37845208(81.95%)	36983638(80.09%)	861570(1.87%)	18515677(40.09%)	18467961(39.99%)	18469060(39.99%)	18514578(40.09%)	12920936(27.98%)	24062702(52.11%)	34704938(75.15%)
C3_3	47054630	42743639(90.84%)	41701342(88.62%)	1042297(2.22%)	20896537(44.41%)	20804805(44.21%)	20816227(44.24%)	20885115(44.38%)	15774494(33.52%)	25926848(55.1%)	39647066(84.26%)
D4_1	44018818	41150181(93.48%)	40223163(91.38%)	927018(2.11%)	20137438(45.75%)	20085725(45.63%)	20073440(45.6%)	20149723(45.78%)	13683387(31.09%)	26539776(60.29%)	39029764(88.67%)
D4_2	47291740	45048910(95.26%)	44017112(93.08%)	1031798(2.18%)	22044427(46.61%)	21972685(46.46%)	21974249(46.47%)	22042863(46.61%)	15007763(31.73%)	29009349(61.34%)	42715526(90.32%)
D4_3	46628162	43737522(93.8%)	42714156(91.61%)	1023366(2.19%)	21435103(45.97%)	21279053(45.64%)	21326684(45.74%)	21387472(45.87%)	14371797(30.82%)	28342359(60.78%)	41452258(88.9%)
D16_1	45896260	42290350(92.14%)	41329681(90.05%)	960669(2.09%)	20726117(45.16%)	20603564(44.89%)	20634103(44.96%)	20695578(45.09%)	15222453(33.17%)	26107228(56.88%)	39982002(87.11%)
D16_2	43435946	39907669(91.88%)	39016938(89.83%)	890731(2.05%)	19530632(44.96%)	19486306(44.86%)	19491303(44.87%)	19525635(44.95%)	14219619(32.74%)	24797319(57.09%)	37295392(85.86%)
D16_3	46260420	43065974(93.09%)	42186486(91.19%)	879488(1.9%)	21190304(45.81%)	20996182(45.39%)	21066752(45.54%)	21119734(45.65%)	15369323(33.22%)	26817163(57.97%)	40629732(87.83%)
D28_1	45551734	43520039(95.54%)	42606375(93.53%)	913664(2.01%)	21334594(46.84%)	21271781(46.7%)	21284935(46.73%)	21321440(46.81%)	13938063(30.6%)	28668312(62.94%)	41505796(91.12%)
D28_2	44457330	40424303(90.93%)	39385304(88.59%)	1038999(2.34%)	19722825(44.36%)	19662479(44.23%)	19671326(44.25%)	19713978(44.34%)	12811943(28.82%)	26573361(59.77%)	38182660(85.89%)
D28_3	43329214	39119971(90.29%)	38152022(88.05%)	967949(2.23%)	19113825(44.11%)	19038197(43.94%)	19045351(43.95%)	19106671(44.1%)	13274569(30.64%)	24877453(57.41%)	36312274(83.81%)

## Sheet: Supplementary Table S3
Supplementary Table S3. Differential expression of genes between infected and noninfected C. acuminata at 4 WAI.
ID	C1	D4	log2FoldChange	p vlue	regulated	Pfam	Swissprot	GO						KEGG
								biological_process	biological_process_description	cellular_component	cellular_component_description	molecular_function	molecular_function_description	pathway_id	pathway
CacGene27185	3.6166	909.326	7.9998	2.53e-55	UP	PF13460:NAD(P)H-binding	sp|Q8H124|Y2446_ARATH Uncharacterized protein At2g34460, chloroplastic OS=Arabidopsis thaliana OX=3702 GN=At2g34460 PE=1 SV=1	--	--	--	--	--	--	--	--
CacGene23140	1053.61	2.97205	-8.44915	8.11e-52	DOWN	PF13460:NAD(P)H-binding	sp|Q8H124|Y2446_ARATH Uncharacterized protein At2g34460, chloroplastic OS=Arabidopsis thaliana OX=3702 GN=At2g34460 PE=1 SV=1	--	--	--	--	--	--	--	--
CacGene26770	5690.79	44.8686	-6.98497	1.61e-43	DOWN	PF00022:Actin	sp|P53492|ACT7_ARATH Actin-7 OS=Arabidopsis thaliana OX=3702 GN=ACT7 PE=1 SV=1	--	--	--	--	--	--	--	--
CacGene05650	183.761	1469.43	2.99776	3.55e-28	UP	-	-	--	--	--	--	--	--	--	--
CacGene07953	1124.99	23.1602	-5.6017	5.69e-28	DOWN	PF02779:Transketolase, pyrimidine binding domain|PF02780:Transketolase, C-terminal domain|PF13292:1-deoxy-D-xylulose-5-phosphate synthase	sp|Q6YU51|DXS2_ORYSJ Probable 1-deoxy-D-xylulose-5-phosphate synthase 2, chloroplastic OS=Oryza sativa subsp. japonica OX=39947 GN=Os07g0190000 PE=2 SV=1	GO:0016114||GO:0008152||GO:0006629||GO:0006720||GO:0006721||GO:0008150||GO:0008299||GO:0008610||GO:0009058||GO:0009987||GO:0044237||GO:0044238||GO:0044249||GO:0044255||GO:0071704||GO:1901576	terpenoid biosynthetic process||metabolic process||lipid metabolic process||isoprenoid metabolic process||terpenoid metabolic process||biological_process||isoprenoid biosynthetic process||lipid biosynthetic process||biosynthetic process||cellular process||cellular metabolic process||primary metabolic process||cellular biosynthetic process||cellular lipid metabolic process||organic substance metab…			GO:0003824||GO:0008661||GO:0003674||GO:0016740||GO:0016744	catalytic activity||1-deoxy-D-xylulose-5-phosphate synthase activity||molecular_function||transferase activity||transferase activity, transferring aldehyde or ketonic groups	egr00730||egr00900||egr01100||egr01110	Thiamine metabolism||Terpenoid backbone biosynthesis||Metabolic pathways||Biosynthesis of secondary metabolites
CacGene00483	47.9036	2517.79	5.71967	5.69e-27	UP	PF02779:Transketolase, pyrimidine binding domain|PF02780:Transketolase, C-terminal domain|PF13292:4-deoxy-U-xylulose-5-phosphate synthase	sp|Q5Z9Z0|BGL24_ORYSJ Beta-glucosidase 24 OS=Oryza sativa subsp. japonica OX=39947 GN=BGLU24 PE=2 SV=1	GO:0005975||GO:0008152||GO:0008150||GO:0044238||GO:0071704	carbohydrate metabolic process||metabolic process||biological_process||primary metabolic process||organic substance metabolic process			GO:0004553||GO:0003674||GO:0003824||GO:0016787||GO:0016798	hydrolase activity, hydrolyzing O-glycosyl compounds||molecular_function||catalytic activity||hydrolase activity||hydrolase activity, acting on glycosyl bonds	--	--
CacGene07672	648.489	61.2597	-3.40269	1.66e-24	DOWN	PF00924:Mechanosensitive ion channel	sp|Q9SPP9|RG1_RAUSE Raucaffricine-O-beta-D-glucosidase OS=Rauvolfia serpentina OX=4060 GN=RG PE=1 SV=1	GO:0005975||GO:0008152||GO:0008150||GO:0044238||GO:0071704	carbohydrate metabolic process||metabolic process||biological_process||primary metabolic process||organic substance metabolic process			GO:0004553||GO:0003674||GO:0003824||GO:0016787||GO:0016798	hydrolase activity, hydrolyzing O-glycosyl compounds||molecular_function||catalytic activity||hydrolase activity||hydrolase activity, acting on glycosyl bonds	--	--
CacGene27186	52.7486	1116.35	4.413	3.21e-24	UP	PF04481:Protein of unknown function (DUF561)	sp|Q1XDB4|YCF23_PYRYE Uncharacterized protein ycf23 OS=Pyropia yezoensis OX=2788 GN=ycf23 PE=3 SV=1	--	--	--	--	--	--	--	--
CacGene09052	2.34013	529.894	7.73505	1.32e-23	UP	-	-	--	--	--	--	--	--	--	--
CacGene03681	331.446	27.1843	-3.60807	2.92e-23	DOWN	PF00924:Mechanosensitive ion channel	sp|Q9LYG9|MSL10_ARATH Mechanosensitive ion channel protein 10 OS=Arabidopsis thaliana OX=3702 GN=MSL10 PE=1 SV=1	GO:0055085||GO:0006810||GO:0008150||GO:0051179||GO:0051234	transmembrane transport||transport||biological_process||localization||establishment of localization	GO:0016020||GO:0005575	membrane||cellular_component			--	--
CacGene14795	1228.57	5979.63	2.28335	6.87e-23	UP	PF03766:Remorin, N-terminal region|PF03763:Remorin, C-terminal region	sp|P93788|REMO_SOLTU Remorin OS=Solanum tuberosum OX=4113 PE=1 SV=1	--	--	--	--	--	--	--	--
CacGene17749	102.409	3411.82	5.06078	2.46e-22	UP	PF01501:Glycosyl transferase family 8	sp|Q9XGN4|GOLS1_AJURE Galactinol synthase 1 OS=Ajuga reptans OX=38596 GN=GOLS1 PE=1 SV=1					GO:0016757||GO:0003674||GO:0003824||GO:0016740	transferase activity, transferring glycosyl groups||molecular_function||catalytic activity||transferase activity	egr00052||egr01100	Galactose metabolism||Metabolic pathways
CacGene20399	7.06559	159.994	4.4991	2.69e-21	UP	PF10604:Polyketide cyclase / dehydrase and lipid transport	sp|Q8VZS8|PYL1_ARATH Abscisic acid receptor PYL1 OS=Arabidopsis thaliana OX=3702 GN=PYL1 PE=1 SV=1	--	--	--	--	--	--	egr04016||egr04075	MAPK signaling pathway - plant||Plant hormone signal transduction
CacGene05950	327.065	31.6854	-3.37007	2.98e-21	DOWN	PF00067:Cytochrome P450	sp|P28002|COMT1_MEDSA Caffeic acid 3-O-methyltransferase OS=Medicago sativa OX=3879 PE=1 SV=1					GO:0046983||GO:0008171||GO:0005515||GO:0003674||GO:0005488||GO:0003824||GO:0008168||GO:0016740||GO:0016741	protein dimerization activity||O-methyltransferase activity||protein binding||molecular_function||binding||catalytic activity||methyltransferase activity||transferase activity||transferase activity, transferring one-carbon groups	egr00380||egr00940||egr01100||egr01110	Tryptophan metabolism||Phenylpropanoid biosynthesis||Metabolic pathways||Biosynthesis of secondary metabolites
CacGene04898	90.2151	638.402	2.82288	4.77e-21	UP	PF02779:Transketolase, pyrimidine binding domain|PF02780:Transketolase, C-terminal domain|PF13292:9-deoxy-U-xylulose-2-phosphate synthase	sp|Q5Z676|CML29_ORYSJ Probable calcium-binding protein CML29 OS=Oryza sativa subsp. japonica OX=39947 GN=CML29 PE=2 SV=1					GO:0005509||GO:0003674||GO:0005488||GO:0046872||GO:0043167||GO:0043169	calcium ion binding||molecular_function||binding||metal ion binding||ion binding||cation binding	--	--
CacGene03162	57.7367	632.96	3.45669	8.04e-21	UP	PF00462:Glutaredoxin	sp|Q9M9Y9|GRS11_ARATH Monothiol glutaredoxin-S11 OS=Arabidopsis thaliana OX=3702 GN=GRXS11 PE=3 SV=1	GO:0045454||GO:0008150||GO:0009987||GO:0019725||GO:0042592||GO:0050789||GO:0050794||GO:0065007||GO:0065008	cell redox homeostasis||biological_process||cellular process||cellular homeostasis||homeostatic process||regulation of biological process||regulation of cellular process||biological regulation||regulation of biological quality			GO:0009055||GO:0015035||GO:0003674||GO:0003824||GO:0016491||GO:0015036||GO:0016667	electron transfer activity||protein disulfide oxidoreductase activity||molecular_function||catalytic activity||oxidoreductase activity||disulfide oxidoreductase activity||oxidoreductase activity, acting on a sulfur group of donors	--	--
CacGene17999	18.1365	564.812	4.96242	8.37e-21	UP	PF00067:Cytochrome P450	sp|Q94IA6|C90D1_ARATH 3-epi-6-deoxocathasterone 23-monooxygenase CYP90D1 OS=Arabidopsis thaliana OX=3702 GN=CYP90D1 PE=1 SV=1	GO:0055114||GO:0008152||GO:0008150	oxidation-reduction process||metabolic process||biological_process			GO:0005506||GO:0016705||GO:0020037||GO:0003674||GO:0005488||GO:0046872||GO:0043167||GO:0043169||GO:0046914||GO:0003824||GO:0016491||GO:0046906||GO:0048037||GO:0097159||GO:1901363	iron ion binding||oxidoreductase activity, acting on paired donors, with incorporation or reduction of molecular oxygen||heme binding||molecular_function||binding||metal ion binding||ion binding||cation binding||transition metal ion binding||catalytic activity||oxidoreductase activity||tetrapyrrole binding||cofactor binding||organic cyclic compound binding||heterocyclic compound binding	egr00905||egr01100||egr01110	Brassinosteroid biosynthesis||Metabolic pathways||Biosynthesis of secondary metabolites
CacGene19755	3.73847	356.793	6.55125	1.23e-20	UP	PF14368:Probable lipid transfer	-	--	--	--	--	--	--	--	--
novel.668	0	466.085	11.3494	2.63e-20	UP	-	-	--	--	--	--	--	--	--	--
CacGene00021	16.3384	448.711	4.77774	3.11e-20	UP	PF00860:Permease family	sp|Q9SRK7|AZG1_ARATH Adenine/guanine permease AZG1 OS=Arabidopsis thaliana OX=3702 GN=AZG1 PE=2 SV=1	GO:0055085||GO:0006810||GO:0008150||GO:0051179||GO:0051234	transmembrane transport||transport||biological_process||localization||establishment of localization	GO:0016020||GO:0005575	membrane||cellular_component	GO:0022857||GO:0003674||GO:0005215	transmembrane transporter activity||molecular_function||transporter activity	--	--
CacGene04259	120.727	2369.82	4.29504	4.05e-20	UP	PF01092:Ribosomal protein S6e|PF01061:ABC-2 type transporter|PF00005:ABC transporter	sp|H9BZ66|ABCG1_PETHY ABC transporter G family member 1 OS=Petunia hybrida OX=4102 GN=ABCG1 PE=2 SV=1	GO:0006412||GO:0008152||GO:0006518||GO:0006807||GO:0008150||GO:0009058||GO:0009059||GO:0009987||GO:0010467||GO:0019538||GO:0034641||GO:0034645||GO:0043043||GO:0043170||GO:0043603||GO:0043604||GO:0044237||GO:0044238||GO:0044249||GO:0044260||GO:0044267||GO:0044271||GO:0071704||GO:1901564||GO:1901566||GO:1901576	translation||metabolic process||peptide metabolic process||nitrogen compound metabolic process||biological_process||biosynthetic process||macromolecule biosynthetic process||cellular process||gene expression||protein metabolic process||cellular nitrogen compound metabolic process||cellular macromolecule biosynthetic process||peptide biosynthetic process||macromolecule metabolic process||cellular …	GO:0005622||GO:0005840||GO:0016020||GO:0005575||GO:0005623||GO:0044464||GO:0005737||GO:0032991||GO:0043226||GO:0043228||GO:0043229||GO:0043232||GO:0044424||GO:0044444||GO:1990904	intracellular||ribosome||membrane||cellular_component||cell||cell part||cytoplasm||protein-containing complex||organelle||non-membrane-bounded organelle||intracellular organelle||intracellular non-membrane-bounded organelle||intracellular part||cytoplasmic part||ribonucleoprotein complex	GO:0003735||GO:0005524||GO:0016887||GO:0003674||GO:0005198||GO:0000166||GO:0005488||GO:0008144||GO:0017076||GO:0030554||GO:0032553||GO:0032555||GO:0032559||GO:0035639||GO:0036094||GO:0043167||GO:0043168||GO:0097159||GO:0097367||GO:1901265||GO:1901363||GO:0003824||GO:0017111||GO:0016462||GO:0016787||GO:0016817||GO:0016818	structural constituent of ribosome||ATP binding||ATPase activity||molecular_function||structural molecule activity||nucleotide binding||binding||drug binding||purine nucleotide binding||adenyl nucleotide binding||ribonucleotide binding||purine ribonucleotide binding||adenyl ribonucleotide binding||purine ribonucleoside triphosphate binding||small molecule binding||ion binding||anion binding||orga…	egr02010	ABC transporters
CacGene17710	83.9116	1626	4.27486	4.88e-20	UP	PF00564:PB1 domain	-					GO:0005515||GO:0003674||GO:0005488	protein binding||molecular_function||binding	--	--
CacGene27398	7.34183	288.921	5.29443	1.05e-19	UP	PF18052:Rx N-terminal domain|PF00931:NB-ARC domain	sp|Q8L4N1|PHO34_ARATH Universal stress protein PHOS34 OS=Arabidopsis thaliana OX=3702 GN=PHOS34 PE=1 SV=1	--	--	--	--	--	--	--	--
CacGene01239	49.189	1202.61	4.6046	1.94e-19	UP	-	-	--	--	--	--	--	--	--	--
CacGene00876	291.361	3342.74	3.5185	2.23e-19	UP	PF00141:Peroxidase|PF00450:Serine carboxypeptidase	sp|Q9FH05|SCP42_ARATH Serine carboxypeptidase-like 42 OS=Arabidopsis thaliana OX=3702 GN=SCPL42 PE=2 SV=1	GO:0006979||GO:0055114||GO:0006508||GO:0006950||GO:0008150||GO:0050896||GO:0008152||GO:0006807||GO:0019538||GO:0043170||GO:0044238||GO:0071704||GO:1901564	response to oxidative stress||oxidation-reduction process||proteolysis||response to stress||biological_process||response to stimulus||metabolic process||nitrogen compound metabolic process||protein metabolic process||macromolecule metabolic process||primary metabolic process||organic substance metabolic process||organonitrogen compound metabolic process			GO:0004601||GO:0020037||GO:0004185||GO:0003674||GO:0003824||GO:0016491||GO:0016209||GO:0016684||GO:0005488||GO:0046906||GO:0048037||GO:0097159||GO:1901363||GO:0004180||GO:0008236||GO:0008233||GO:0008238||GO:0070011||GO:0016787||GO:0017171||GO:0070008||GO:0140096	peroxidase activity||heme binding||serine-type carboxypeptidase activity||molecular_function||catalytic activity||oxidoreductase activity||antioxidant activity||oxidoreductase activity, acting on peroxide as acceptor||binding||tetrapyrrole binding||cofactor binding||organic cyclic compound binding||heterocyclic compound binding||carboxypeptidase activity||serine-type peptidase activity||peptidase…	--	--
CacGene22732	300.405	1664.75	2.47219	4.59e-19	UP	PF02519:Auxin responsive protein	sp|Q9ZUZ3|SAU32_ARATH Auxin-responsive protein SAUR32 OS=Arabidopsis thaliana OX=3702 GN=SAUR32 PE=2 SV=1	GO:0009733||GO:0008150||GO:0009719||GO:0009725||GO:0010033||GO:0042221||GO:0050896	response to auxin||biological_process||response to endogenous stimulus||response to hormone||response to organic substance||response to chemical||response to stimulus					--	--
CacGene16198	557.651	18.1915	-4.93839	5.7e-19	DOWN	-	sp|B3H5K9|NEDD1_ARATH Protein NEDD1 OS=Arabidopsis thaliana OX=3702 GN=NEDD1 PE=2 SV=1					GO:0005515||GO:0003674||GO:0005488	protein binding||molecular_function||binding	--	--
novel.828	2391.62	7908.02	1.72533	6.57e-19	UP	-	-	--	--	--	--	--	--	--	--
CacGene12872	97.8773	806.393	3.04027	1.42e-18	UP	PF00403:Heavy-metal-associated domain	sp|Q9LF57|HIP21_ARATH Heavy metal-associated isoprenylated plant protein 21 OS=Arabidopsis thaliana OX=3702 GN=HIPP21 PE=1 SV=1	GO:0030001||GO:0006810||GO:0006811||GO:0006812||GO:0008150||GO:0051179||GO:0051234	metal ion transport||transport||ion transport||cation transport||biological_process||localization||establishment of localization			GO:0046872||GO:0003674||GO:0005488||GO:0043167||GO:0043169	metal ion binding||molecular_function||binding||ion binding||cation binding	--	--
CacGene03573	24.9573	347.751	3.7989	2.09e-18	UP	PF18052:Rx N-terminal domain|PF00931:NB-ARC domain	sp|Q7XA42|RGA1_SOLBU Putative disease resistance protein RGA1 OS=Solanum bulbocastanum OX=147425 GN=RGA1 PE=2 SV=2					GO:0043531||GO:0000166||GO:0003674||GO:0005488||GO:0017076||GO:0030554||GO:0032553||GO:0032555||GO:0032559||GO:0036094||GO:0043167||GO:0043168||GO:0097159||GO:0097367||GO:1901265||GO:1901363	ADP binding||nucleotide binding||molecular_function||binding||purine nucleotide binding||adenyl nucleotide binding||ribonucleotide binding||purine ribonucleotide binding||adenyl ribonucleotide binding||small molecule binding||ion binding||anion binding||organic cyclic compound binding||carbohydrate derivative binding||nucleoside phosphate binding||heterocyclic compound binding	--	--
CacGene12909	331.9	3141.94	3.24308	2.25e-18	UP	PF04749:PLAC8 family	sp|Q9LQU4|PCR2_ARATH Protein PLANT CADMIUM RESISTANCE 2 OS=Arabidopsis thaliana OX=3702 GN=PCR2 PE=1 SV=1	--	--	--	--	--	--	--	--
novel.1759	227.157	9.57767	-4.57934	3.1e-18	DOWN	-	sp|Q9XF63|ATL3_ARATH RING-H2 finger protein ATL3 OS=Arabidopsis thaliana OX=3702 GN=ATL3 PE=2 SV=1	--	--	--	--	--	--	--	--
CacGene26481	349.337	1.37055	-8.01517	3.31e-18	DOWN	PF02779:Transketolase, pyrimidine binding domain|PF02780:Transketolase, C-terminal domain|PF13292:3-deoxy-D-xylulose-8-phosphate synthase	sp|P59226|H32_ARATH Histone H3.2 OS=Arabidopsis thaliana OX=3702 GN=HTR2 PE=1 SV=2			GO:0000786||GO:0005622||GO:0005575||GO:0000785||GO:0005623||GO:0005694||GO:0032991||GO:0032993||GO:0043226||GO:0043228||GO:0043229||GO:0043232||GO:0044422||GO:0044424||GO:0044427||GO:0044446||GO:0044464||GO:0044815	nucleosome||intracellular||cellular_component||chromatin||cell||chromosome||protein-containing complex||protein-DNA complex||organelle||non-membrane-bounded organelle||intracellular organelle||intracellular non-membrane-bounded organelle||organelle part||intracellular part||chromosomal part||intracellular organelle part||cell part||DNA packaging complex	GO:0003677||GO:0046982||GO:0003674||GO:0003676||GO:0005488||GO:0097159||GO:1901363||GO:0005515||GO:0046983	DNA binding||protein heterodimerization activity||molecular_function||nucleic acid binding||binding||organic cyclic compound binding||heterocyclic compound binding||protein binding||protein dimerization activity	--	--
CacGene18578	155.352	780.903	2.33216	5.24e-18	UP	PF00171:Aldehyde dehydrogenase family	sp|Q70E96|AL3F1_ARATH Aldehyde dehydrogenase family 3 member F1 OS=Arabidopsis thaliana OX=3702 GN=ALDH3F1 PE=2 SV=2	GO:0055114||GO:0008152||GO:0008150	oxidation-reduction process||metabolic process||biological_process			GO:0016491||GO:0003674||GO:0003824	oxidoreductase activity||molecular_function||catalytic activity	egr00010||egr00053||egr00071||egr00280||egr00310||egr00330||egr00340||egr00380||egr00410||egr00561||egr00620||egr00770||egr00903||egr01100||egr01110||egr01240	Glycolysis / Gluconeogenesis||Ascorbate and aldarate metabolism||Fatty acid degradation||Valine, leucine and isoleucine degradation||Lysine degradation||Arginine and proline metabolism||Histidine metabolism||Tryptophan metabolism||beta-Alanine metabolism||Glycerolipid metabolism||Pyruvate metabolism||Pantothenate and CoA biosynthesis||Limonene and pinene degradation||Metabolic pathways||Biosynthe…
CacGene00520	3.27859	388.697	6.90359	8.23e-18	UP	PF02779:Transketolase, pyrimidine binding domain|PF02780:Transketolase, C-terminal domain|PF13292:3-deoxy-U-xylulose-6-phosphate synthase	sp|Q5Z9Z0|BGL24_ORYSJ Beta-glucosidase 24 OS=Oryza sativa subsp. japonica OX=39947 GN=BGLU24 PE=2 SV=1	GO:0005975||GO:0008152||GO:0008150||GO:0044238||GO:0071704	carbohydrate metabolic process||metabolic process||biological_process||primary metabolic process||organic substance metabolic process			GO:0004553||GO:0003674||GO:0003824||GO:0016787||GO:0016798	hydrolase activity, hydrolyzing O-glycosyl compounds||molecular_function||catalytic activity||hydrolase activity||hydrolase activity, acting on glycosyl bonds	--	--
CacGene02840	573.252	7309.86	3.67231	8.91e-18	UP	PF12481:Aluminium induced protein	sp|P24805|TSJT1_TOBAC Stem-specific protein TSJT1 OS=Nicotiana tabacum OX=4097 GN=TSJT1 PE=2 SV=1	--	--	--	--	--	--	--	--
CacGene04702	6.35152	259.606	5.37785	9.67e-18	UP	PF00892:EamA-like transporter family	sp|Q6NMB7|WTR7_ARATH WAT1-related protein At1g43650 OS=Arabidopsis thaliana OX=3702 GN=At1g43650 PE=2 SV=1			GO:0016020||GO:0016021||GO:0005575||GO:0031224||GO:0044425	membrane||integral component of membrane||cellular_component||intrinsic component of membrane||membrane part			--	--
CacGene21080	3.39769	172.709	5.71915	1e-17	UP	PF03140:Plant protein of unknown function	-	--	--	--	--	--	--	--	--
CacGene27164	864.227	9.36822	-6.53781	3.93e-17	DOWN	PF02779:Transketolase, pyrimidine binding domain|PF02780:Transketolase, C-terminal domain|PF13292:8-deoxy-D-xylulose-6-phosphate synthase	sp|A2XRZ0|AKR2_ORYSI Probable aldo-keto reductase 2 OS=Oryza sativa subsp. indica OX=39946 GN=OsI_15387 PE=3 SV=1	--	--	--	--	--	--	--	--
novel.110	7.70687	530.838	6.0879	6.78e-17	UP	PF02727:Copper amine oxidase, N2 domain|PF02728:Copper amine oxidase, N3 domain|PF01179:Copper amine oxidase, enzyme domain	sp|Q8H1H9|AMO_ARATH Primary amine oxidase OS=Arabidopsis thaliana OX=3702 GN=At1g62810 PE=2 SV=1	GO:0009308||GO:0055114||GO:0008152||GO:0006807||GO:0008150||GO:0071704||GO:1901564	amine metabolic process||oxidation-reduction process||metabolic process||nitrogen compound metabolic process||biological_process||organic substance metabolic process||organonitrogen compound metabolic process			GO:0005507||GO:0008131||GO:0048038||GO:0003674||GO:0005488||GO:0046872||GO:0043167||GO:0043169||GO:0046914||GO:0003824||GO:0016491||GO:0016638||GO:0016641||GO:0048037	copper ion binding||primary amine oxidase activity||quinone binding||molecular_function||binding||metal ion binding||ion binding||cation binding||transition metal ion binding||catalytic activity||oxidoreductase activity||oxidoreductase activity, acting on the CH-NH2 group of donors||oxidoreductase activity, acting on the CH-NH2 group of donors, oxygen as acceptor||cofactor binding	egr00260||egr00350||egr00360||egr00410||egr00950||egr00960||egr01100||egr01110	Glycine, serine and threonine metabolism||Tyrosine metabolism||Phenylalanine metabolism||beta-Alanine metabolism||Isoquinoline alkaloid biosynthesis||Tropane, piperidine and pyridine alkaloid biosynthesis||Metabolic pathways||Biosynthesis of secondary metabolites
CacGene01678	539.697	0	-11.5065	8.19e-17	DOWN	-	sp|Q38732|DAG_ANTMA DAG protein, chloroplastic OS=Antirrhinum majus OX=4151 GN=DAG PE=2 SV=1	--	--	--	--	--	--	--	--
CacGene03646	216.693	24.4525	-3.14655	8.63e-17	DOWN	PF03732:Retrotransposon gag protein	-	--	--	--	--	--	--	--	--
CacGene04756	10.0304	158.082	3.98121	8.81e-17	UP	-	sp|P48384|TRXM_PEA Thioredoxin M-type, chloroplastic OS=Pisum sativum OX=3888 PE=2 SV=1	--	--	--	--	--	--	--	--
CacGene17324	186.951	4758.14	4.66985	1.57e-16	UP	PF04043:Plant invertase/pectin methylesterase inhibitor|PF01095:Pectinesterase	sp|Q3E989|PME54_ARATH Probable pectinesterase/pectinesterase inhibitor 54 OS=Arabidopsis thaliana OX=3702 GN=PME54 PE=2 SV=1	GO:0042545||GO:0008150||GO:0009987||GO:0016043||GO:0045229||GO:0071554||GO:0071555||GO:0071840	cell wall modification||biological_process||cellular process||cellular component organization||external encapsulating structure organization||cell wall organization or biogenesis||cell wall organization||cellular component organization or biogenesis			GO:0004857||GO:0030599||GO:0003674||GO:0030234||GO:0098772||GO:0003824||GO:0016787||GO:0016788||GO:0052689	enzyme inhibitor activity||pectinesterase activity||molecular_function||enzyme regulator activity||molecular function regulator||catalytic activity||hydrolase activity||hydrolase activity, acting on ester bonds||carboxylic ester hydrolase activity	egr00040||egr01100	Pentose and glucuronate interconversions||Metabolic pathways
CacGene27120	322.843	1.40015	-7.89162	1.81e-16	DOWN	PF00160:Cyclophilin type peptidyl-prolyl cis-trans isomerase/CLD	sp|O49939|TLP40_SPIOL Peptidyl-prolyl cis-trans isomerase, chloroplastic OS=Spinacia oleracea OX=3562 GN=TLP40 PE=1 SV=1	GO:0000413||GO:0008152||GO:0006464||GO:0006807||GO:0008150||GO:0009987||GO:0018193||GO:0018208||GO:0019538||GO:0036211||GO:0043170||GO:0043412||GO:0044237||GO:0044238||GO:0044260||GO:0044267||GO:0071704||GO:1901564	protein peptidyl-prolyl isomerization||metabolic process||cellular protein modification process||nitrogen compound metabolic process||biological_process||cellular process||peptidyl-amino acid modification||peptidyl-proline modification||protein metabolic process||protein modification process||macromolecule metabolic process||macromolecule modification||cellular metabolic process||primary metaboli…			GO:0003755||GO:0003674||GO:0003824||GO:0016853||GO:0016859||GO:0140096	peptidyl-prolyl cis-trans isomerase activity||molecular_function||catalytic activity||isomerase activity||cis-trans isomerase activity||catalytic activity, acting on a protein	--	--
CacGene18405	315.604	1371.32	2.11878	2.49e-16	UP	PF13499:EF-hand domain pair	sp|Q9D869|CHP2_MOUSE Calcineurin B homologous protein 2 OS=Mus musculus OX=10090 GN=Chp2 PE=2 SV=4					GO:0005509||GO:0003674||GO:0005488||GO:0046872||GO:0043167||GO:0043169	calcium ion binding||molecular_function||binding||metal ion binding||ion binding||cation binding	--	--
CacGene09410	302.399	979.893	1.69526	3.28e-16	UP	PF05212:Protein of unknown function (DUF707)	-	--	--	--	--	--	--	--	--
CacGene07129	212.43	12.3275	-4.10137	3.96e-16	DOWN	PF00931:NB-ARC domain|PF18052:Rx N-terminal domain	sp|Q39214|RPM1_ARATH Disease resistance protein RPM1 OS=Arabidopsis thaliana OX=3702 GN=RPM1 PE=1 SV=1					GO:0043531||GO:0000166||GO:0003674||GO:0005488||GO:0017076||GO:0030554||GO:0032553||GO:0032555||GO:0032559||GO:0036094||GO:0043167||GO:0043168||GO:0097159||GO:0097367||GO:1901265||GO:1901363	ADP binding||nucleotide binding||molecular_function||binding||purine nucleotide binding||adenyl nucleotide binding||ribonucleotide binding||purine ribonucleotide binding||adenyl ribonucleotide binding||small molecule binding||ion binding||anion binding||organic cyclic compound binding||carbohydrate derivative binding||nucleoside phosphate binding||heterocyclic compound binding	egr04626	Plant-pathogen interaction
CacGene27118	473.942	0.681224	-9.46001	4.42e-16	DOWN	-	sp|Q9M3C6|PSA3C_ARATH Photosystem I assembly factor PSA3, chloroplastic OS=Arabidopsis thaliana OX=3702 GN=PSA3 PE=1 SV=1	--	--	--	--	--	--	--	--
CacGene03391	7.22551	329.428	5.47727	5.54e-16	UP	PF02779:Transketolase, pyrimidine binding domain|PF02780:Transketolase, C-terminal domain|PF13292:7-deoxy-U-xylulose-5-phosphate synthase	sp|Q9LPZ9|SD113_ARATH G-type lectin S-receptor-like serine/threonine-protein kinase SD1-13 OS=Arabidopsis thaliana OX=3702 GN=SD113 PE=1 SV=2	GO:0048544||GO:0006468||GO:0000003||GO:0007154||GO:0008037||GO:0008150||GO:0009856||GO:0009875||GO:0009987||GO:0022414||GO:0032501||GO:0044706||GO:0051704||GO:0008152||GO:0006464||GO:0006793||GO:0006796||GO:0006807||GO:0016310||GO:0019538||GO:0036211||GO:0043170||GO:0043412||GO:0044237||GO:0044238||GO:0044260||GO:0044267||GO:0071704||GO:1901564	recognition of pollen||protein phosphorylation||reproduction||cell communication||cell recognition||biological_process||pollination||pollen-pistil interaction||cellular process||reproductive process||multicellular organismal process||multi-multicellular organism process||multi-organism process||metabolic process||cellular protein modification process||phosphorus metabolic process||phosphate-conta…			GO:0004672||GO:0003674||GO:0003824||GO:0016301||GO:0016740||GO:0016772||GO:0016773||GO:0140096	protein kinase activity||molecular_function||catalytic activity||kinase activity||transferase activity||transferase activity, transferring phosphorus-containing groups||phosphotransferase activity, alcohol group as acceptor||catalytic activity, acting on a protein	--	--
CacGene16743	550.299	2480.69	2.17202	5.68e-16	UP	PF03106:WRKY DNA -binding domain	sp|Q93WV5|WRK69_ARATH Probable WRKY transcription factor 69 OS=Arabidopsis thaliana OX=3702 GN=WRKY69 PE=2 SV=1	GO:0006355||GO:0008152||GO:0006139||GO:0006351||GO:0006725||GO:0006807||GO:0008150||GO:0009058||GO:0009059||GO:0009889||GO:0009987||GO:0010467||GO:0010468||GO:0010556||GO:0016070||GO:0018130||GO:0019219||GO:0019222||GO:0019438||GO:0031323||GO:0031326||GO:0032774||GO:0034641||GO:0034645||GO:0034654||GO:0043170||GO:0044237||GO:0044238||GO:0044249||GO:0044260||GO:0044271||GO:0046483||GO:0050789||GO:…	regulation of transcription, DNA-templated||metabolic process||nucleobase-containing compound metabolic process||transcription, DNA-templated||cellular aromatic compound metabolic process||nitrogen compound metabolic process||biological_process||biosynthetic process||macromolecule biosynthetic process||regulation of biosynthetic process||cellular process||gene expression||regulation of gene expre…			GO:0003700||GO:0043565||GO:0003674||GO:0140110||GO:0003676||GO:0003677||GO:0005488||GO:0097159||GO:1901363	DNA binding transcription factor activity||sequence-specific DNA binding||molecular_function||transcription regulator activity||nucleic acid binding||DNA binding||binding||organic cyclic compound binding||heterocyclic compound binding	--	--
CacGene05847	1856.85	9697.72	2.38455	6.47e-16	UP	-	sp|Q9MA62|RLF22_ARATH Protein RALF-like 22 OS=Arabidopsis thaliana OX=3702 GN=RALFL22 PE=3 SV=1	--	--	--	--	--	--	--	--
CacGene23141	933.104	49.8639	-4.22354	6.98e-16	DOWN	PF04481:Protein of unknown function (DUF561)	sp|Q1XDB4|YCF23_PYRYE Uncharacterized protein ycf23 OS=Pyropia yezoensis OX=2788 GN=ycf23 PE=3 SV=1	--	--	--	--	--	--	--	--
CacGene06639	203.712	853.137	2.06482	7.67e-16	UP	PF00389:D-isomer specific 2-hydroxyacid dehydrogenase, catalytic domain	sp|Q9LE33|HPR3_ARATH Glyoxylate/hydroxypyruvate reductase HPR3 OS=Arabidopsis thaliana OX=3702 GN=HPR3 PE=2 SV=1	GO:0055114||GO:0008152||GO:0008150	oxidation-reduction process||metabolic process||biological_process			GO:0016616||GO:0051287||GO:0003674||GO:0003824||GO:0016491||GO:0016614||GO:0000166||GO:0005488||GO:0036094||GO:0048037||GO:0050662||GO:0097159||GO:1901265||GO:1901363	oxidoreductase activity, acting on the CH-OH group of donors, NAD or NADP as acceptor||NAD binding||molecular_function||catalytic activity||oxidoreductase activity||oxidoreductase activity, acting on CH-OH group of donors||nucleotide binding||binding||small molecule binding||cofactor binding||coenzyme binding||organic cyclic compound binding||nucleoside phosphate binding||heterocyclic compound bi…	egr00260||egr00630||egr01100||egr01110||egr01200	Glycine, serine and threonine metabolism||Glyoxylate and dicarboxylate metabolism||Metabolic pathways||Biosynthesis of secondary metabolites||Carbon metabolism
novel.818	427.75	0	-11.171	8.19e-16	DOWN	-	-	--	--	--	--	--	--	--	--
CacGene10207	297.406	7692.52	4.69378	1.49e-15	UP	PF02779:Transketolase, pyrimidine binding domain|PF02780:Transketolase, C-terminal domain|PF13292:2-deoxy-U-xylulose-4-phosphate synthase	sp|Q7XKV4|BGL12_ORYSJ Beta-glucosidase 12 OS=Oryza sativa subsp. japonica OX=39947 GN=BGLU12 PE=1 SV=2	GO:0005975||GO:0008152||GO:0008150||GO:0044238||GO:0071704	carbohydrate metabolic process||metabolic process||biological_process||primary metabolic process||organic substance metabolic process			GO:0004553||GO:0003674||GO:0003824||GO:0016787||GO:0016798	hydrolase activity, hydrolyzing O-glycosyl compounds||molecular_function||catalytic activity||hydrolase activity||hydrolase activity, acting on glycosyl bonds	--	--
novel.872	185.223	0	-9.96353	1.52e-15	DOWN	-	sp|Q3L181|PERR_RAUSE Perakine reductase OS=Rauvolfia serpentina OX=4060 GN=PR PE=1 SV=1	--	--	--	--	--	--	--	--
CacGene01848	270.072	0	-10.5073	1.56e-15	DOWN	-	-	--	--	--	--	--	--	egr03060	Protein export
CacGene03891	467.303	10741.3	4.52205	1.75e-15	UP	PF00226:DnaJ domain	sp|Q9FYB5|DNJ11_ARATH Chaperone protein dnaJ 11, chloroplastic OS=Arabidopsis thaliana OX=3702 GN=ATJ11 PE=1 SV=2	--	--	--	--	--	--	--	--
novel.367	31.4676	219.926	2.80882	2.07e-15	UP	-	-	--	--	--	--	--	--	--	--
CacGene07385	938.19	21979.8	4.55002	2.27e-15	UP	PF03055:Retinal pigment epithelial membrane protein	sp|O49675|CCD4_ARATH Probable carotenoid cleavage dioxygenase 4, chloroplastic OS=Arabidopsis thaliana OX=3702 GN=CCD4 PE=1 SV=1	GO:0055114||GO:0008152||GO:0008150	oxidation-reduction process||metabolic process||biological_process			GO:0016702||GO:0003674||GO:0003824||GO:0016491||GO:0016701||GO:0051213	oxidoreductase activity, acting on single donors with incorporation of molecular oxygen, incorporation of two atoms of oxygen||molecular_function||catalytic activity||oxidoreductase activity||oxidoreductase activity, acting on single donors with incorporation of molecular oxygen||dioxygenase activity	egr00906||egr01100||egr01110	Carotenoid biosynthesis||Metabolic pathways||Biosynthesis of secondary metabolites
CacGene09426	82.9481	762.632	3.19693	2.6e-15	UP	PF00107:Zinc-binding dehydrogenase|PF08240:Alcohol dehydrogenase GroES-like domain	sp|W8JWV8|8HGO_CATRO 8-hydroxygeraniol oxidoreductase OS=Catharanthus roseus OX=4058 GN=8HGO PE=1 SV=1	GO:0055114||GO:0008152||GO:0008150	oxidation-reduction process||metabolic process||biological_process					egr00010||egr00071||egr00350||egr00620||egr01100||egr01110||egr01200	Glycolysis / Gluconeogenesis||Fatty acid degradation||Tyrosine metabolism||Pyruvate metabolism||Metabolic pathways||Biosynthesis of secondary metabolites||Carbon metabolism
CacGene18618	45.3518	833.694	4.20451	2.89e-15	UP	-	sp|Q9FFN2|GLYT3_ARATH Probable glycosyltransferase At5g03795 OS=Arabidopsis thaliana OX=3702 GN=At5g03795 PE=3 SV=2	--	--	--	--	--	--	--	--
CacGene23389	33.5768	584.469	4.11798	3.05e-15	UP	PF00230:Major intrinsic protein	sp|Q41951|TIP21_ARATH Aquaporin TIP2-1 OS=Arabidopsis thaliana OX=3702 GN=TIP2-1 PE=1 SV=2	GO:0055085||GO:0006810||GO:0008150||GO:0051179||GO:0051234	transmembrane transport||transport||biological_process||localization||establishment of localization	GO:0016020||GO:0005575	membrane||cellular_component	GO:0015267||GO:0003674||GO:0005215||GO:0022857||GO:0022803	channel activity||molecular_function||transporter activity||transmembrane transporter activity||passive transmembrane transporter activity	--	--
CacGene03071	1247.25	6393.13	2.35775	3.23e-15	UP	PF00581:Rhodanese-like domain	sp|Q9LZP9|CP122_ARATH Calvin cycle protein CP12-2, chloroplastic OS=Arabidopsis thaliana OX=3702 GN=CP12-2 PE=1 SV=1	--	--	--	--	--	--	--	--
novel.1380	712.985	3957.13	2.47274	3.58e-15	UP	-	-	--	--	--	--	--	--	--	--
CacGene18747	365	2845.23	2.96335	3.82e-15	UP	PF00085:Thioredoxin	sp|Q38879|TRXH2_ARATH Thioredoxin H2 OS=Arabidopsis thaliana OX=3702 GN=TRX2 PE=1 SV=2	GO:0045454||GO:0008150||GO:0009987||GO:0019725||GO:0042592||GO:0050789||GO:0050794||GO:0065007||GO:0065008	cell redox homeostasis||biological_process||cellular process||cellular homeostasis||homeostatic process||regulation of biological process||regulation of cellular process||biological regulation||regulation of biological quality					--	--
CacGene20866	1.54447	2242.16	10.4774	3.98e-15	UP	PF07876:Stress responsive A/B Barrel Domain	-	--	--	--	--	--	--	--	--
CacGene02670	198.069	7.85778	-4.66611	4.19e-15	DOWN	-	-	--	--	--	--	--	--	--	--
CacGene04271	79.813	692.618	3.11317	5.75e-15	UP	-	-	--	--	--	--	--	--	--	--
CacGene08050	1.80969	170.803	6.49564	9.34e-15	UP	PF00892:EamA-like transporter family	sp|Q9FGG3|WTR45_ARATH WAT1-related protein At5g64700 OS=Arabidopsis thaliana OX=3702 GN=At5g64700 PE=2 SV=1			GO:0016020||GO:0016021||GO:0005575||GO:0031224||GO:0044425	membrane||integral component of membrane||cellular_component||intrinsic component of membrane||membrane part			--	--
CacGene07121	274.204	1103.61	2.00956	9.52e-15	UP	PF14009:Domain of unknown function (DUF4228)	-	--	--	--	--	--	--	--	--
CacGene14137	4011.38	27142.5	2.75834	1.16e-14	UP	PF05564:Dormancy/auxin associated protein	sp|B9DGG8|DRM1_ARATH Dormancy-associated protein 1 OS=Arabidopsis thaliana OX=3702 GN=DRM1 PE=1 SV=1	--	--	--	--	--	--	--	--
CacGene18487	301.411	7.61874	-5.31992	1.35e-14	DOWN	PF02779:Transketolase, pyrimidine binding domain|PF02780:Transketolase, C-terminal domain|PF13292:3-deoxy-D-xylulose-5-phosphate synthase	sp|A0A2R6Q326|AT16_ACTCC Alcohol acyltransferase 16 OS=Actinidia chinensis var. chinensis OX=1590841 GN=AT16 PE=1 SV=2					GO:0016747||GO:0003674||GO:0003824||GO:0016740||GO:0016746	transferase activity, transferring acyl groups other than amino-acyl groups||molecular_function||catalytic activity||transferase activity||transferase activity, transferring acyl groups	--	--
CacGene04749	380.467	64.6519	-2.55472	1.5e-14	DOWN	PF00107:Zinc-binding dehydrogenase|PF08240:Alcohol dehydrogenase GroES-like domain	sp|P28032|ADH2_SOLLC Alcohol dehydrogenase 2 OS=Solanum lycopersicum OX=4081 GN=ADH2 PE=2 SV=2	GO:0055114||GO:0008152||GO:0008150	oxidation-reduction process||metabolic process||biological_process					egr00010||egr00071||egr00350||egr00592||egr00620||egr01100||egr01110	Glycolysis / Gluconeogenesis||Fatty acid degradation||Tyrosine metabolism||alpha-Linolenic acid metabolism||Pyruvate metabolism||Metabolic pathways||Biosynthesis of secondary metabolites
CacGene04199	198.462	17.4511	-3.50754	2.31e-14	DOWN	PF00069:Protein kinase domain	sp|Q8LGB6|ZED1_ARATH Non-functional pseudokinase ZED1 OS=Arabidopsis thaliana OX=3702 GN=ZED1 PE=1 SV=1	GO:0006468||GO:0008152||GO:0006464||GO:0006793||GO:0006796||GO:0006807||GO:0008150||GO:0009987||GO:0016310||GO:0019538||GO:0036211||GO:0043170||GO:0043412||GO:0044237||GO:0044238||GO:0044260||GO:0044267||GO:0071704||GO:1901564	protein phosphorylation||metabolic process||cellular protein modification process||phosphorus metabolic process||phosphate-containing compound metabolic process||nitrogen compound metabolic process||biological_process||cellular process||phosphorylation||protein metabolic process||protein modification process||macromolecule metabolic process||macromolecule modification||cellular metabolic process|…			GO:0004672||GO:0005524||GO:0003674||GO:0003824||GO:0016301||GO:0016740||GO:0016772||GO:0016773||GO:0140096||GO:0000166||GO:0005488||GO:0008144||GO:0017076||GO:0030554||GO:0032553||GO:0032555||GO:0032559||GO:0035639||GO:0036094||GO:0043167||GO:0043168||GO:0097159||GO:0097367||GO:1901265||GO:1901363	protein kinase activity||ATP binding||molecular_function||catalytic activity||kinase activity||transferase activity||transferase activity, transferring phosphorus-containing groups||phosphotransferase activity, alcohol group as acceptor||catalytic activity, acting on a protein||nucleotide binding||binding||drug binding||purine nucleotide binding||adenyl nucleotide binding||ribonucleotide binding|…	--	--
CacGene13574	139.361	0	-9.55273	3.09e-14	DOWN	PF02779:Transketolase, pyrimidine binding domain|PF02780:Transketolase, C-terminal domain|PF13292:1-deoxy-D-xylulose-9-phosphate synthase	sp|Q5JK32|HAK5_ORYSJ Potassium transporter 5 OS=Oryza sativa subsp. japonica OX=39947 GN=HAK5 PE=2 SV=2	GO:0071805||GO:0006810||GO:0006811||GO:0006812||GO:0006813||GO:0030001||GO:0008150||GO:0009987||GO:0015672||GO:0034220||GO:0051179||GO:0051234||GO:0055085||GO:0071804||GO:0098655||GO:0098660||GO:0098662	potassium ion transmembrane transport||transport||ion transport||cation transport||potassium ion transport||metal ion transport||biological_process||cellular process||monovalent inorganic cation transport||ion transmembrane transport||localization||establishment of localization||transmembrane transport||cellular potassium ion transport||cation transmembrane transport||inorganic ion transmembrane …	GO:0016020||GO:0005575	membrane||cellular_component	GO:0015079||GO:0003674||GO:0046873||GO:0005215||GO:0022857||GO:0008324||GO:0015075||GO:0015077||GO:0015318||GO:0022890	potassium ion transmembrane transporter activity||molecular_function||metal ion transmembrane transporter activity||transporter activity||transmembrane transporter activity||cation transmembrane transporter activity||ion transmembrane transporter activity||monovalent inorganic cation transmembrane transporter activity||inorganic molecular entity transmembrane transporter activity||inorganic catio…	--	--
CacGene02311	990.58	4764.9	2.26574	3.57e-14	UP	PF00581:Rhodanese-like domain	sp|Q38853|STR15_ARATH Rhodanese-like domain-containing protein 15, chloroplastic OS=Arabidopsis thaliana OX=3702 GN=STR15 PE=2 SV=1	--	--	--	--	--	--	--	--
CacGene15801	667.132	3476.77	2.38117	3.76e-14	UP	PF00085:Thioredoxin	sp|P07591|TRXM_SPIOL Thioredoxin M-type, chloroplastic OS=Spinacia oleracea OX=3562 PE=1 SV=2	GO:0045454||GO:0008150||GO:0009987||GO:0019725||GO:0042592||GO:0050789||GO:0050794||GO:0065007||GO:0065008	cell redox homeostasis||biological_process||cellular process||cellular homeostasis||homeostatic process||regulation of biological process||regulation of cellular process||biological regulation||regulation of biological quality					--	--
CacGene03680	154.713	7.70574	-4.32698	4.21e-14	DOWN	PF00924:Mechanosensitive ion channel	sp|Q9LYG9|MSL10_ARATH Mechanosensitive ion channel protein 10 OS=Arabidopsis thaliana OX=3702 GN=MSL10 PE=1 SV=1	GO:0055085||GO:0006810||GO:0008150||GO:0051179||GO:0051234	transmembrane transport||transport||biological_process||localization||establishment of localization	GO:0016020||GO:0005575	membrane||cellular_component			--	--
CacGene27477	1296.62	4952.45	1.93345	5.3e-14	UP	-	-	--	--	--	--	--	--	--	--
CacGene03074	54.9742	901.174	4.03415	6.06e-14	UP	PF02779:Transketolase, pyrimidine binding domain|PF02780:Transketolase, C-terminal domain|PF13292:5-deoxy-U-xylulose-4-phosphate synthase		GO:0007165||GO:0000160||GO:0007154||GO:0008150||GO:0009987||GO:0023052||GO:0050789||GO:0050794||GO:0050896||GO:0051716||GO:0065007||GO:0035556	signal transduction||phosphorelay signal transduction system||cell communication||biological_process||cellular process||signaling||regulation of biological process||regulation of cellular process||response to stimulus||cellular response to stimulus||biological regulation||intracellular signal transduction			GO:0000155||GO:0003674||GO:0003824||GO:0004672||GO:0004673||GO:0004871||GO:0038023||GO:0016301||GO:0016740||GO:0016772||GO:0016773||GO:0016775||GO:0060089||GO:0140096	phosphorelay sensor kinase activity||molecular_function||catalytic activity||protein kinase activity||protein histidine kinase activity||signal transducer activity||signaling receptor activity||kinase activity||transferase activity||transferase activity, transferring phosphorus-containing groups||phosphotransferase activity, alcohol group as acceptor||phosphotransferase activity, nitrogenous grou…	--	--
CacGene13063	2474.39	9693.72	1.96988	8.35e-14	UP	PF04117:Mpv17 / PMP22 family	-			GO:0016021||GO:0005575||GO:0016020||GO:0031224||GO:0044425	integral component of membrane||cellular_component||membrane||intrinsic component of membrane||membrane part			egr04146	Peroxisome
CacGene16824	28.0308	389.283	3.7815	8.65e-14	UP	PF00083:Sugar (and other) transporter	sp|Q94AZ2|STP13_ARATH Sugar transport protein 13 OS=Arabidopsis thaliana OX=3702 GN=STP13 PE=1 SV=2	GO:0055085||GO:0006810||GO:0008150||GO:0051179||GO:0051234	transmembrane transport||transport||biological_process||localization||establishment of localization	GO:0016021||GO:0005575||GO:0016020||GO:0031224||GO:0044425	integral component of membrane||cellular_component||membrane||intrinsic component of membrane||membrane part	GO:0022857||GO:0003674||GO:0005215	transmembrane transporter activity||molecular_function||transporter activity	--	--
CacGene11520	109.535	1.98853	-5.76756	1.12e-13	DOWN	PF02779:Transketolase, pyrimidine binding domain|PF02780:Transketolase, C-terminal domain|PF13292:1-deoxy-D-xylulose-5-phosphate synthase	sp|A6MZM2|SUI1_ORYSI Protein translation factor SUI1 homolog OS=Oryza sativa subsp. indica OX=39946 GN=GOS2 PE=2 SV=1	GO:0006413||GO:0008152||GO:0006412||GO:0006518||GO:0006807||GO:0008150||GO:0009058||GO:0009059||GO:0009987||GO:0010467||GO:0019538||GO:0034641||GO:0034645||GO:0043043||GO:0043170||GO:0043603||GO:0043604||GO:0044237||GO:0044238||GO:0044249||GO:0044260||GO:0044267||GO:0044271||GO:0071704||GO:1901564||GO:1901566||GO:1901576	translational initiation||metabolic process||translation||peptide metabolic process||nitrogen compound metabolic process||biological_process||biosynthetic process||macromolecule biosynthetic process||cellular process||gene expression||protein metabolic process||cellular nitrogen compound metabolic process||cellular macromolecule biosynthetic process||peptide biosynthetic process||macromolecule me…			GO:0003743||GO:0003674||GO:0003676||GO:0003723||GO:0005488||GO:0008135||GO:0097159||GO:1901363	translation initiation factor activity||molecular_function||nucleic acid binding||RNA binding||binding||translation factor activity, RNA binding||organic cyclic compound binding||heterocyclic compound binding	--	--
CacGene26269	50.9881	375.495	2.88009	1.34e-13	UP	-	-	--	--	--	--	--	--	--	--
CacGene06976	1152.6	5979.12	2.37465	1.42e-13	UP	PF12697:Alpha/beta hydrolase family	sp|Q9SQR3|D14_ARATH Strigolactone esterase D14 OS=Arabidopsis thaliana OX=3702 GN=D14 PE=1 SV=1	--	--	--	--	--	--	--	--
CacGene20652	307.406	2016.57	2.71211	1.94e-13	UP	PF13639:Ring finger domain	sp|Q9LQX2|MPSR1_ARATH E3 ubiquitin-protein ligase MPSR1 OS=Arabidopsis thaliana OX=3702 GN=MPSR1 PE=1 SV=1	--	--	--	--	--	--	--	--
CacGene05202	14.5287	209.894	3.85437	2.37e-13	UP	PF01490:Transmembrane amino acid transporter protein	sp|Q8GYS4|AVT1D_ARATH Amino acid transporter AVT1D OS=Arabidopsis thaliana OX=3702 GN=AVT1D PE=2 SV=1	--	--	--	--	--	--	--	--
CacGene27163	134.186	2.40516	-5.82136	2.9e-13	DOWN	PF02779:Transketolase, pyrimidine binding domain|PF02780:Transketolase, C-terminal domain|PF13292:1-deoxy-D-xylulose-5-phosphate synthase	sp|A2XRZ0|AKR2_ORYSI Probable aldo-keto reductase 2 OS=Oryza sativa subsp. indica OX=39946 GN=OsI_15387 PE=3 SV=1	--	--	--	--	--	--	--	--
CacGene22444	74.0647	2275.56	4.93929	3.71e-13	UP	PF00188:Cysteine-rich secretory protein family	sp|P11670|PRB1_TOBAC Basic form of pathogenesis-related protein 1 OS=Nicotiana tabacum OX=4097 PE=3 SV=1	--	--	--	--	--	--	egr04016||egr04075||egr04626	MAPK signaling pathway - plant||Plant hormone signal transduction||Plant-pathogen interaction
CacGene03208	251.123	1671.65	2.73365	3.99e-13	UP	-	sp|Q93ZT5|EDL3_ARATH EID1-like F-box protein 3 OS=Arabidopsis thaliana OX=3702 GN=EDL3 PE=2 SV=1	--	--	--	--	--	--	--	--
novel.768	133.991	0	-9.49568	4.67e-13	DOWN	-	-	--	--	--	--	--	--	--	--
CacGene17398	156.214	0	-9.71672	4.73e-13	DOWN	PF00118:TCP-1/cpn60 chaperonin family	sp|Q9LV21|TCPD_ARATH T-complex protein 1 subunit delta OS=Arabidopsis thaliana OX=3702 GN=CCT4 PE=1 SV=1					GO:0005524||GO:0000166||GO:0003674||GO:0005488||GO:0008144||GO:0017076||GO:0030554||GO:0032553||GO:0032555||GO:0032559||GO:0035639||GO:0036094||GO:0043167||GO:0043168||GO:0097159||GO:0097367||GO:1901265||GO:1901363	ATP binding||nucleotide binding||molecular_function||binding||drug binding||purine nucleotide binding||adenyl nucleotide binding||ribonucleotide binding||purine ribonucleotide binding||adenyl ribonucleotide binding||purine ribonucleoside triphosphate binding||small molecule binding||ion binding||anion binding||organic cyclic compound binding||carbohydrate derivative binding||nucleoside phosphate …	--	--
CacGene08938	58.7462	429.517	2.87157	4.8e-13	UP	PF00067:Cytochrome P450	sp|O81970|C71A9_SOYBN Cytochrome P450 71A9 OS=Glycine max OX=3847 GN=CYP71A9 PE=2 SV=1	GO:0055114||GO:0008152||GO:0008150	oxidation-reduction process||metabolic process||biological_process			GO:0005506||GO:0016705||GO:0020037||GO:0003674||GO:0005488||GO:0046872||GO:0043167||GO:0043169||GO:0046914||GO:0003824||GO:0016491||GO:0046906||GO:0048037||GO:0097159||GO:1901363	iron ion binding||oxidoreductase activity, acting on paired donors, with incorporation or reduction of molecular oxygen||heme binding||molecular_function||binding||metal ion binding||ion binding||cation binding||transition metal ion binding||catalytic activity||oxidoreductase activity||tetrapyrrole binding||cofactor binding||organic cyclic compound binding||heterocyclic compound binding	--	--
CacGene21959	38.4086	261.739	2.76416	6.55e-13	UP	PF03106:WRKY DNA -binding domain	sp|O04609|WRK22_ARATH WRKY transcription factor 22 OS=Arabidopsis thaliana OX=3702 GN=WRKY22 PE=2 SV=1	GO:0006355||GO:0008152||GO:0006139||GO:0006351||GO:0006725||GO:0006807||GO:0008150||GO:0009058||GO:0009059||GO:0009889||GO:0009987||GO:0010467||GO:0010468||GO:0010556||GO:0016070||GO:0018130||GO:0019219||GO:0019222||GO:0019438||GO:0031323||GO:0031326||GO:0032774||GO:0034641||GO:0034645||GO:0034654||GO:0043170||GO:0044237||GO:0044238||GO:0044249||GO:0044260||GO:0044271||GO:0046483||GO:0050789||GO:…	regulation of transcription, DNA-templated||metabolic process||nucleobase-containing compound metabolic process||transcription, DNA-templated||cellular aromatic compound metabolic process||nitrogen compound metabolic process||biological_process||biosynthetic process||macromolecule biosynthetic process||regulation of biosynthetic process||cellular process||gene expression||regulation of gene expre…			GO:0003700||GO:0043565||GO:0003674||GO:0140110||GO:0003676||GO:0003677||GO:0005488||GO:0097159||GO:1901363	DNA binding transcription factor activity||sequence-specific DNA binding||molecular_function||transcription regulator activity||nucleic acid binding||DNA binding||binding||organic cyclic compound binding||heterocyclic compound binding	egr04016||egr04626	MAPK signaling pathway - plant||Plant-pathogen interaction
CacGene12459	206.757	38.761	-2.41811	6.57e-13	DOWN	PF00141:Peroxidase	sp|Q9LHA7|PER31_ARATH Peroxidase 31 OS=Arabidopsis thaliana OX=3702 GN=PER31 PE=2 SV=1	GO:0006979||GO:0055114||GO:0006950||GO:0008150||GO:0050896||GO:0008152	response to oxidative stress||oxidation-reduction process||response to stress||biological_process||response to stimulus||metabolic process			GO:0004601||GO:0020037||GO:0003674||GO:0003824||GO:0016491||GO:0016209||GO:0016684||GO:0005488||GO:0046906||GO:0048037||GO:0097159||GO:1901363	peroxidase activity||heme binding||molecular_function||catalytic activity||oxidoreductase activity||antioxidant activity||oxidoreductase activity, acting on peroxide as acceptor||binding||tetrapyrrole binding||cofactor binding||organic cyclic compound binding||heterocyclic compound binding	egr00940||egr01100||egr01110	Phenylpropanoid biosynthesis||Metabolic pathways||Biosynthesis of secondary metabolites
CacGene04925	281.241	19.3167	-3.87226	6.9e-13	DOWN	PF14309:Domain of unknown function (DUF4378)|PF12552:Protein of unknown function (DUF3741)	sp|Q8VZH2|APM1_ARATH Aminopeptidase M1 OS=Arabidopsis thaliana OX=3702 GN=APM1 PE=1 SV=1					GO:0008237||GO:0008270||GO:0003674||GO:0003824||GO:0008233||GO:0070011||GO:0016787||GO:0140096||GO:0005488||GO:0046872||GO:0043167||GO:0043169||GO:0046914	metallopeptidase activity||zinc ion binding||molecular_function||catalytic activity||peptidase activity||peptidase activity, acting on L-amino acid peptides||hydrolase activity||catalytic activity, acting on a protein||binding||metal ion binding||ion binding||cation binding||transition metal ion binding	--	--
CacGene21473	81.8348	1040.53	3.66741	6.9e-13	UP	-	sp|Q9LI74|CHUP1_ARATH Protein CHUP1, chloroplastic OS=Arabidopsis thaliana OX=3702 GN=CHUP1 PE=1 SV=1	--	--	--	--	--	--	--	--
CacGene24105	635.496	2382.2	1.90624	1.13e-12	UP	PF01513:ATP-NAD kinase	sp|Q9C5W3|NADK2_ARATH NAD kinase 2, chloroplastic OS=Arabidopsis thaliana OX=3702 GN=NADK2 PE=1 SV=1	GO:0006741||GO:0008152||GO:0006139||GO:0006725||GO:0006732||GO:0006733||GO:0006739||GO:0006753||GO:0006793||GO:0006796||GO:0006807||GO:0008150||GO:0009058||GO:0009108||GO:0009117||GO:0009165||GO:0009987||GO:0018130||GO:0019359||GO:0019362||GO:0019363||GO:0019438||GO:0019637||GO:0034641||GO:0034654||GO:0044237||GO:0044238||GO:0044249||GO:0044271||GO:0044281||GO:0046483||GO:0046496||GO:0051186||GO:…	NADP biosynthetic process||metabolic process||nucleobase-containing compound metabolic process||cellular aromatic compound metabolic process||coenzyme metabolic process||oxidoreduction coenzyme metabolic process||NADP metabolic process||nucleoside phosphate metabolic process||phosphorus metabolic process||phosphate-containing compound metabolic process||nitrogen compound metabolic process||biolog…			GO:0003951||GO:0003674||GO:0003824||GO:0016301||GO:0016740||GO:0016772||GO:0016773	NAD+ kinase activity||molecular_function||catalytic activity||kinase activity||transferase activity||transferase activity, transferring phosphorus-containing groups||phosphotransferase activity, alcohol group as acceptor	egr00760||egr01100||egr01240	Nicotinate and nicotinamide metabolism||Metabolic pathways||Biosynthesis of cofactors
CacGene05583	42.9814	1166.66	4.7561	1.39e-12	UP	PF04564:U-box domain	sp|O80742|PUB19_ARATH U-box domain-containing protein 19 OS=Arabidopsis thaliana OX=3702 GN=PUB19 PE=2 SV=1	GO:0016567||GO:0008152||GO:0006464||GO:0006807||GO:0008150||GO:0009987||GO:0019538||GO:0032446||GO:0036211||GO:0043170||GO:0043412||GO:0044237||GO:0044238||GO:0044260||GO:0044267||GO:0070647||GO:0071704||GO:1901564	protein ubiquitination||metabolic process||cellular protein modification process||nitrogen compound metabolic process||biological_process||cellular process||protein metabolic process||protein modification by small protein conjugation||protein modification process||macromolecule metabolic process||macromolecule modification||cellular metabolic process||primary metabolic process||cellular macromole…			GO:0004842||GO:0003674||GO:0003824||GO:0016740||GO:0019787||GO:0140096	ubiquitin-protein transferase activity||molecular_function||catalytic activity||transferase activity||ubiquitin-like protein transferase activity||catalytic activity, acting on a protein	--	--
CacGene20342	344.657	1549.86	2.16995	1.44e-12	UP	PF00244:14-3-3 protein	sp|P93206|14331_SOLLC 14-3-3 protein 1 OS=Solanum lycopersicum OX=4081 GN=TFT1 PE=3 SV=2	--	--	--	--	--	--	--	--
CacGene20300	99.2321	2164.57	4.44637	1.65e-12	UP	-	sp|Q9LSK9|Y5566_ARATH Uncharacterized protein At5g65660 OS=Arabidopsis thaliana OX=3702 GN=At5g65660 PE=2 SV=1	--	--	--	--	--	--	--	--
CacGene10235	590.047	5914.36	3.32558	1.67e-12	UP	PF00197:Trypsin and protease inhibitor	sp|P32765|ASP_THECC 21 kDa seed protein OS=Theobroma cacao OX=3641 GN=ASP PE=2 SV=1					GO:0004866||GO:0003674||GO:0004857||GO:0061135||GO:0030414||GO:0030234||GO:0061134||GO:0098772	endopeptidase inhibitor activity||molecular_function||enzyme inhibitor activity||endopeptidase regulator activity||peptidase inhibitor activity||enzyme regulator activity||peptidase regulator activity||molecular function regulator	--	--
CacGene07787	170.222	18.5259	-3.20226	2.11e-12	DOWN	PF00225:Kinesin motor domain	sp|F4K0J3|KN4C_ARATH Kinesin-like protein KIN-4C OS=Arabidopsis thaliana OX=3702 GN=KIN4C PE=2 SV=2	GO:0007018||GO:0007017||GO:0006928||GO:0008150||GO:0009987	microtubule-based movement||microtubule-based process||movement of cell or subcellular component||biological_process||cellular process			GO:0003777||GO:0005524||GO:0008017||GO:0003674||GO:0003774||GO:0003824||GO:0017111||GO:0016462||GO:0016787||GO:0016817||GO:0016818||GO:0000166||GO:0005488||GO:0008144||GO:0017076||GO:0030554||GO:0032553||GO:0032555||GO:0032559||GO:0035639||GO:0036094||GO:0043167||GO:0043168||GO:0097159||GO:0097367||GO:1901265||GO:1901363||GO:0005515||GO:0008092||GO:0015631	microtubule motor activity||ATP binding||microtubule binding||molecular_function||motor activity||catalytic activity||nucleoside-triphosphatase activity||pyrophosphatase activity||hydrolase activity||hydrolase activity, acting on acid anhydrides||hydrolase activity, acting on acid anhydrides, in phosphorus-containing anhydrides||nucleotide binding||binding||drug binding||purine nucleotide binding…	--	--
CacGene06911	7.3523	97.4039	3.75493	2.73e-12	UP	PF02779:Transketolase, pyrimidine binding domain|PF02780:Transketolase, C-terminal domain|PF13292:8-deoxy-D-xylulose-6-phosphate synthase	-	--	--	--	--	--	--	--	--
CacGene11122	131.828	527.549	2.00168	2.86e-12	UP	PF00925:GTP cyclohydrolase II|PF00926:3,4-dihydroxy-2-butanone 4-phosphate synthase	sp|Q9FN89|RIBA3_ARATH Monofunctional riboflavin biosynthesis protein RIBA 3, chloroplastic OS=Arabidopsis thaliana OX=3702 GN=RIBA3 PE=1 SV=1	GO:0009231||GO:0008152||GO:0006766||GO:0006767||GO:0006771||GO:0006807||GO:0008150||GO:0009058||GO:0009110||GO:0009987||GO:0017144||GO:0018130||GO:0034641||GO:0042364||GO:0042726||GO:0042727||GO:0044237||GO:0044249||GO:0044271||GO:0044281||GO:0044283||GO:0046483||GO:0071704||GO:1901360||GO:1901362||GO:1901564||GO:1901566||GO:1901576	riboflavin biosynthetic process||metabolic process||vitamin metabolic process||water-soluble vitamin metabolic process||riboflavin metabolic process||nitrogen compound metabolic process||biological_process||biosynthetic process||vitamin biosynthetic process||cellular process||drug metabolic process||heterocycle biosynthetic process||cellular nitrogen compound metabolic process||water-soluble vita…			GO:0008686||GO:0003674||GO:0003824||GO:0016829||GO:0016830	3,4-dihydroxy-2-butanone-4-phosphate synthase activity||molecular_function||catalytic activity||lyase activity||carbon-carbon lyase activity	egr00740||egr00790||egr01100||egr01110||egr01240	Riboflavin metabolism||Folate biosynthesis||Metabolic pathways||Biosynthesis of secondary metabolites||Biosynthesis of cofactors
CacGene11086	8.57532	159.909	4.19499	3e-12	UP	PF14309:Domain of unknown function (DUF4378)|PF12552:Protein of unknown function (DUF3741)	sp|F4HSD5|TRM32_ARATH Protein TRM32 OS=Arabidopsis thaliana OX=3702 GN=TRM32 PE=2 SV=1	--	--	--	--	--	--	--	--
CacGene23926	239.401	19.9033	-3.59105	3.01e-12	DOWN	PF03081:Exo70 exocyst complex subunit	sp|Q9FGH9|E70B1_ARATH Exocyst complex component EXO70B1 OS=Arabidopsis thaliana OX=3702 GN=EXO70B1 PE=1 SV=1	GO:0006887||GO:0016192||GO:0046903||GO:0006810||GO:0008150||GO:0009987||GO:0032940||GO:0051179||GO:0051234	exocytosis||vesicle-mediated transport||secretion||transport||biological_process||cellular process||secretion by cell||localization||establishment of localization	GO:0000145||GO:0005622||GO:0005575||GO:0005623||GO:0005737||GO:0005938||GO:0032991||GO:0044424||GO:0044444||GO:0044448||GO:0044464||GO:0071944||GO:0099023||GO:0099568	exocyst||intracellular||cellular_component||cell||cytoplasm||cell cortex||protein-containing complex||intracellular part||cytoplasmic part||cell cortex part||cell part||cell periphery||tethering complex||cytoplasmic region			--	--
CacGene14537	154.604	10.4777	-3.88476	3.06e-12	DOWN	PF00027:Cyclic nucleotide-binding domain|PF00520:Ion transport protein	sp|Q9LEQ3|CNG18_ARATH Cyclic nucleotide-gated ion channel 18 OS=Arabidopsis thaliana OX=3702 GN=CNGC18 PE=1 SV=1	GO:0006811||GO:0055085||GO:0006810||GO:0008150||GO:0051179||GO:0051234	ion transport||transmembrane transport||transport||biological_process||localization||establishment of localization	GO:0016020||GO:0005575	membrane||cellular_component	GO:0005216||GO:0003674||GO:0005215||GO:0022857||GO:0015075||GO:0015267||GO:0015318||GO:0022803||GO:0022838	ion channel activity||molecular_function||transporter activity||transmembrane transporter activity||ion transmembrane transporter activity||channel activity||inorganic molecular entity transmembrane transporter activity||passive transmembrane transporter activity||substrate-specific channel activity	egr04626	Plant-pathogen interaction
CacGene15396	93.3684	1269.06	3.7635	3.7e-12	UP	PF04770:ZF-HD protein dimerisation region	sp|Q9LJW5|MIF2_ARATH Mini zinc finger protein 2 OS=Arabidopsis thaliana OX=3702 GN=MIF2 PE=1 SV=1	--	--	--	--	--	--	--	--
CacGene04353	464.032	135.995	-1.77117	4.15e-12	DOWN	PF03800:Nuf2 family	sp|Q8RXJ0|NUF2_ARATH Kinetochore protein NUF2 homolog OS=Arabidopsis thaliana OX=3702 GN=NUF2 PE=1 SV=1			GO:0000776||GO:0031262||GO:0005622||GO:0005575||GO:0000775||GO:0005623||GO:0005694||GO:0032991||GO:0043226||GO:0043228||GO:0043229||GO:0043232||GO:0044422||GO:0044424||GO:0044427||GO:0044446||GO:0044464||GO:0098687	kinetochore||Ndc80 complex||intracellular||cellular_component||chromosome, centromeric region||cell||chromosome||protein-containing complex||organelle||non-membrane-bounded organelle||intracellular organelle||intracellular non-membrane-bounded organelle||organelle part||intracellular part||chromosomal part||intracellular organelle part||cell part||chromosomal region			--	--
CacGene11026	14.0931	599.284	5.41417	4.25e-12	UP	PF00407:Pathogenesis-related protein Bet v I family	sp|O50001|PRU1_PRUAR Major allergen Pru ar 1 OS=Prunus armeniaca OX=36596 PE=1 SV=1	GO:0006952||GO:0006950||GO:0008150||GO:0050896	defense response||response to stress||biological_process||response to stimulus					--	--
CacGene13676	1.40936	189.384	7.15573	4.94e-12	UP	PF13520:Amino acid permease|PF13906:C-terminus of AA_permease	sp|Q84MA5|CAAT1_ARATH Cationic amino acid transporter 1 OS=Arabidopsis thaliana OX=3702 GN=CAT1 PE=1 SV=1	GO:0055085||GO:0006810||GO:0008150||GO:0051179||GO:0051234	transmembrane transport||transport||biological_process||localization||establishment of localization	GO:0016020||GO:0005575	membrane||cellular_component	GO:0022857||GO:0003674||GO:0005215	transmembrane transporter activity||molecular_function||transporter activity	--	--
CacGene05841	268.632	1798.05	2.74322	5.55e-12	UP	PF00067:Cytochrome P450	sp|Q69F95|C85A_PHAVU Cytochrome P450 85A OS=Phaseolus vulgaris OX=3885 GN=BA13 PE=3 SV=2	GO:0055114||GO:0008152||GO:0008150	oxidation-reduction process||metabolic process||biological_process			GO:0005506||GO:0016705||GO:0020037||GO:0003674||GO:0005488||GO:0046872||GO:0043167||GO:0043169||GO:0046914||GO:0003824||GO:0016491||GO:0046906||GO:0048037||GO:0097159||GO:1901363	iron ion binding||oxidoreductase activity, acting on paired donors, with incorporation or reduction of molecular oxygen||heme binding||molecular_function||binding||metal ion binding||ion binding||cation binding||transition metal ion binding||catalytic activity||oxidoreductase activity||tetrapyrrole binding||cofactor binding||organic cyclic compound binding||heterocyclic compound binding	egr00905||egr01100||egr01110	Brassinosteroid biosynthesis||Metabolic pathways||Biosynthesis of secondary metabolites
CacGene14039	4.25512	195.502	5.53268	6.56e-12	UP	PF00564:PB1 domain	-					GO:0005515||GO:0003674||GO:0005488	protein binding||molecular_function||binding	--	--
CacGene10542	2441.07	12341.6	2.33772	7.38e-12	UP	PF00255:Glutathione peroxidase	sp|Q9SZ54|GPX7_ARATH Putative glutathione peroxidase 7, chloroplastic OS=Arabidopsis thaliana OX=3702 GN=GPX7 PE=3 SV=2	GO:0006979||GO:0055114||GO:0006950||GO:0008150||GO:0050896||GO:0008152	response to oxidative stress||oxidation-reduction process||response to stress||biological_process||response to stimulus||metabolic process			GO:0004602||GO:0003674||GO:0003824||GO:0004601||GO:0016491||GO:0016209||GO:0016684	glutathione peroxidase activity||molecular_function||catalytic activity||peroxidase activity||oxidoreductase activity||antioxidant activity||oxidoreductase activity, acting on peroxide as acceptor	egr00480||egr01100	Glutathione metabolism||Metabolic pathways
CacGene08488	721.981	76.3631	-3.2388	7.73e-12	DOWN	PF01734:Patatin-like phospholipase	sp|Q9SV43|PLP7_ARATH Patatin-like protein 7 OS=Arabidopsis thaliana OX=3702 GN=PLP7 PE=2 SV=1	GO:0006629||GO:0008152||GO:0008150||GO:0044238||GO:0071704	lipid metabolic process||metabolic process||biological_process||primary metabolic process||organic substance metabolic process					--	--
CacGene24956	155.323	2231.98	3.8434	8.5e-12	UP	PF02779:Transketolase, pyrimidine binding domain|PF02780:Transketolase, C-terminal domain|PF13292:1-deoxy-U-xylulose-3-phosphate synthase	sp|P0CI03|PTR28_ARATH Protein NRT1/ PTR FAMILY 5.6 OS=Arabidopsis thaliana OX=3702 GN=NPF5.6 PE=2 SV=1	GO:0055085||GO:0006810||GO:0008150||GO:0051179||GO:0051234	transmembrane transport||transport||biological_process||localization||establishment of localization	GO:0016020||GO:0005575	membrane||cellular_component	GO:0022857||GO:0003674||GO:0005215	transmembrane transporter activity||molecular_function||transporter activity	--	--
CacGene12907	21.5579	321.441	3.89088	8.89e-12	UP	PF04749:PLAC8 family	sp|Q9LQU4|PCR2_ARATH Protein PLANT CADMIUM RESISTANCE 2 OS=Arabidopsis thaliana OX=3702 GN=PCR2 PE=1 SV=1	--	--	--	--	--	--	--	--
CacGene10507	3559.32	12059	1.76035	8.93e-12	UP	PF15365:Proline-rich nuclear receptor coactivator motif	-	--	--	--	--	--	--	--	--
CacGene15769	126.817	1602.46	3.65657	1.06e-11	UP	PF13947:Wall-associated receptor kinase galacturonan-binding	sp|Q9LMN7|WAK5_ARATH Wall-associated receptor kinase 5 OS=Arabidopsis thaliana OX=3702 GN=WAK5 PE=2 SV=1					GO:0030247||GO:0001871||GO:0003674||GO:0030246||GO:0005488	polysaccharide binding||pattern binding||molecular_function||carbohydrate binding||binding	--	--
CacGene12385	152.832	1765.57	3.53154	1.1e-11	UP	-	-	--	--	--	--	--	--	--	--
CacGene26411	307.022	81.2327	-1.91726	1.11e-11	DOWN	PF04564:U-box domain	-	GO:0016567||GO:0008152||GO:0006464||GO:0006807||GO:0008150||GO:0009987||GO:0019538||GO:0032446||GO:0036211||GO:0043170||GO:0043412||GO:0044237||GO:0044238||GO:0044260||GO:0044267||GO:0070647||GO:0071704||GO:1901564	protein ubiquitination||metabolic process||cellular protein modification process||nitrogen compound metabolic process||biological_process||cellular process||protein metabolic process||protein modification by small protein conjugation||protein modification process||macromolecule metabolic process||macromolecule modification||cellular metabolic process||primary metabolic process||cellular macromole…			GO:0004842||GO:0003674||GO:0003824||GO:0016740||GO:0019787||GO:0140096	ubiquitin-protein transferase activity||molecular_function||catalytic activity||transferase activity||ubiquitin-like protein transferase activity||catalytic activity, acting on a protein	--	--
CacGene02691	39.979	343.387	3.09418	1.17e-11	UP	PF00534:Glycosyl transferases group 1|PF05116:Sucrose-6F-phosphate phosphohydrolase|PF00862:Sucrose synthase	sp|O04933|SPSA2_CRAPL Probable sucrose-phosphate synthase 2 OS=Craterostigma plantagineum OX=4153 GN=SPS2 PE=2 SV=1	GO:0005985||GO:0008152||GO:0005975||GO:0005984||GO:0008150||GO:0009311||GO:0009987||GO:0044237||GO:0044238||GO:0044262||GO:0071704	sucrose metabolic process||metabolic process||carbohydrate metabolic process||disaccharide metabolic process||biological_process||oligosaccharide metabolic process||cellular process||cellular metabolic process||primary metabolic process||cellular carbohydrate metabolic process||organic substance metabolic process			GO:0016157||GO:0003674||GO:0003824||GO:0008194||GO:0016740||GO:0016757||GO:0016758||GO:0035251||GO:0046527	sucrose synthase activity||molecular_function||catalytic activity||UDP-glycosyltransferase activity||transferase activity||transferase activity, transferring glycosyl groups||transferase activity, transferring hexosyl groups||UDP-glucosyltransferase activity||glucosyltransferase activity	egr00500||egr01100||egr01110	Starch and sucrose metabolism||Metabolic pathways||Biosynthesis of secondary metabolites
CacGene10843	17.1771	366.141	4.40137	1.33e-11	UP	-	-	--	--	--	--	--	--	--	--
CacGene06917	546.228	104.36	-2.38743	1.55e-11	DOWN	PF00847:AP2 domain	sp|Q9LYD3|DREB3_ARATH Dehydration-responsive element-binding protein 3 OS=Arabidopsis thaliana OX=3702 GN=DREB3 PE=2 SV=1	GO:0006355||GO:0008152||GO:0006139||GO:0006351||GO:0006725||GO:0006807||GO:0008150||GO:0009058||GO:0009059||GO:0009889||GO:0009987||GO:0010467||GO:0010468||GO:0010556||GO:0016070||GO:0018130||GO:0019219||GO:0019222||GO:0019438||GO:0031323||GO:0031326||GO:0032774||GO:0034641||GO:0034645||GO:0034654||GO:0043170||GO:0044237||GO:0044238||GO:0044249||GO:0044260||GO:0044271||GO:0046483||GO:0050789||GO:…	regulation of transcription, DNA-templated||metabolic process||nucleobase-containing compound metabolic process||transcription, DNA-templated||cellular aromatic compound metabolic process||nitrogen compound metabolic process||biological_process||biosynthetic process||macromolecule biosynthetic process||regulation of biosynthetic process||cellular process||gene expression||regulation of gene expre…			GO:0003700||GO:0003677||GO:0003674||GO:0140110||GO:0003676||GO:0005488||GO:0097159||GO:1901363	DNA binding transcription factor activity||DNA binding||molecular_function||transcription regulator activity||nucleic acid binding||binding||organic cyclic compound binding||heterocyclic compound binding	--	--
CacGene26791	127.188	0.323786	-8.46044	1.56e-11	DOWN	PF13639:Ring finger domain	sp|Q8LPN7|RNG1L_ARATH E3 ubiquitin-protein ligase RING1-like OS=Arabidopsis thaliana OX=3702 GN=At3g19950 PE=1 SV=1	--	--	--	--	--	--	--	--
CacGene02453	272.693	36.5369	-2.90492	1.65e-11	DOWN	PF00332:Glycosyl hydrolases family 17|PF07983:X8 domain	sp|Q9C7U5|E132_ARATH Glucan endo-1,3-beta-glucosidase 2 OS=Arabidopsis thaliana OX=3702 GN=At1g66250 PE=2 SV=2	GO:0005975||GO:0008152||GO:0008150||GO:0044238||GO:0071704	carbohydrate metabolic process||metabolic process||biological_process||primary metabolic process||organic substance metabolic process			GO:0004553||GO:0003674||GO:0003824||GO:0016787||GO:0016798	hydrolase activity, hydrolyzing O-glycosyl compounds||molecular_function||catalytic activity||hydrolase activity||hydrolase activity, acting on glycosyl bonds	egr00500||egr01100	Starch and sucrose metabolism||Metabolic pathways
CacGene19573	901.451	3519.7	1.96501	1.73e-11	UP	PF02779:Transketolase, pyrimidine binding domain|PF02780:Transketolase, C-terminal domain|PF13292:9-deoxy-U-xylulose-1-phosphate synthase	sp|Q9FNL7|PTR3_ARATH Protein NRT1/ PTR FAMILY 5.2 OS=Arabidopsis thaliana OX=3702 GN=NPF5.2 PE=2 SV=1	GO:0055085||GO:0006810||GO:0008150||GO:0051179||GO:0051234	transmembrane transport||transport||biological_process||localization||establishment of localization	GO:0016020||GO:0005575	membrane||cellular_component	GO:0022857||GO:0003674||GO:0005215	transmembrane transporter activity||molecular_function||transporter activity	--	--
CacGene25415	10.6745	244.528	4.4981	1.78e-11	UP	PF03088:Strictosidine synthase	sp|Q9SLG8|SSL2_ARATH Protein STRICTOSIDINE SYNTHASE-LIKE 2 OS=Arabidopsis thaliana OX=3702 GN=SSL2 PE=2 SV=1	GO:0009058||GO:0008152||GO:0008150	biosynthetic process||metabolic process||biological_process			GO:0016844||GO:0003674||GO:0003824||GO:0016829||GO:0016840||GO:0016843	strictosidine synthase activity||molecular_function||catalytic activity||lyase activity||carbon-nitrogen lyase activity||amine-lyase activity	--	--
novel.1069	385.562	44.8902	-3.10425	2.04e-11	DOWN	-	-	--	--	--	--	--	--	--	--
CacGene06966	152.699	634.167	2.05468	2.21e-11	UP	PF08523:Multiprotein bridging factor 1|PF01381:Helix-turn-helix	sp|Q9LV58|MBF1C_ARATH Multiprotein-bridging factor 1c OS=Arabidopsis thaliana OX=3702 GN=MBF1C PE=1 SV=1					GO:0003677||GO:0043565||GO:0003674||GO:0003676||GO:0005488||GO:0097159||GO:1901363	DNA binding||sequence-specific DNA binding||molecular_function||nucleic acid binding||binding||organic cyclic compound binding||heterocyclic compound binding	--	--
CacGene04889	0	136.412	9.57755	2.29e-11	UP	PF00168:C2 domain	sp|O04023|SRC2_ARATH Protein SRC2 homolog OS=Arabidopsis thaliana OX=3702 GN=SRC2 PE=1 SV=1	--	--	--	--	--	--	--	--
CacGene25366	0	87.1889	8.932	2.36e-11	UP	PF02779:Transketolase, pyrimidine binding domain|PF02780:Transketolase, C-terminal domain|PF13292:0-deoxy-U-xylulose-8-phosphate synthase	sp|Q9M331|PTR45_ARATH Protein NRT1/ PTR FAMILY 5.7 OS=Arabidopsis thaliana OX=3702 GN=NPF5.7 PE=2 SV=2	GO:0055085||GO:0006810||GO:0008150||GO:0051179||GO:0051234	transmembrane transport||transport||biological_process||localization||establishment of localization	GO:0016020||GO:0005575	membrane||cellular_component	GO:0022857||GO:0003674||GO:0005215	transmembrane transporter activity||molecular_function||transporter activity	--	--
CacGene01410	160.684	27.4071	-2.54994	2.37e-11	DOWN	PF08627:CRT-like, chloroquine-resistance transporter-like	sp|A1L4X0|CLT2_ARATH Protein CLT2, chloroplastic OS=Arabidopsis thaliana OX=3702 GN=CLT2 PE=2 SV=1	--	--	--	--	--	--	--	--
CacGene05931	117.116	781.191	2.73506	2.43e-11	UP	PF00847:AP2 domain	sp|O65665|ERF60_ARATH Ethylene-responsive transcription factor ERF060 OS=Arabidopsis thaliana OX=3702 GN=ERF060 PE=1 SV=1	GO:0006355||GO:0008152||GO:0006139||GO:0006351||GO:0006725||GO:0006807||GO:0008150||GO:0009058||GO:0009059||GO:0009889||GO:0009987||GO:0010467||GO:0010468||GO:0010556||GO:0016070||GO:0018130||GO:0019219||GO:0019222||GO:0019438||GO:0031323||GO:0031326||GO:0032774||GO:0034641||GO:0034645||GO:0034654||GO:0043170||GO:0044237||GO:0044238||GO:0044249||GO:0044260||GO:0044271||GO:0046483||GO:0050789||GO:…	regulation of transcription, DNA-templated||metabolic process||nucleobase-containing compound metabolic process||transcription, DNA-templated||cellular aromatic compound metabolic process||nitrogen compound metabolic process||biological_process||biosynthetic process||macromolecule biosynthetic process||regulation of biosynthetic process||cellular process||gene expression||regulation of gene expre…			GO:0003677||GO:0003700||GO:0003674||GO:0003676||GO:0005488||GO:0097159||GO:1901363||GO:0140110	DNA binding||DNA binding transcription factor activity||molecular_function||nucleic acid binding||binding||organic cyclic compound binding||heterocyclic compound binding||transcription regulator activity	--	--
CacGene05405	4.91789	102.919	4.40217	2.52e-11	UP	-	-	--	--	--	--	--	--	--	--
CacGene21892	134.021	2111.24	3.9783	2.95e-11	UP	-	-	--	--	--	--	--	--	--	--
CacGene07141	870.168	3032.77	1.80156	3.24e-11	UP	PF17144:Ribosomal large subunit proteins 60S L5, and 50S L18|PF14204:Ribosomal L18 C-terminal region	sp|P27141|CAHC_TOBAC Carbonic anhydrase, chloroplastic OS=Nicotiana tabacum OX=4097 PE=2 SV=1					GO:0004089||GO:0008270||GO:0003674||GO:0003824||GO:0016829||GO:0016835||GO:0016836||GO:0005488||GO:0046872||GO:0043167||GO:0043169||GO:0046914	carbonate dehydratase activity||zinc ion binding||molecular_function||catalytic activity||lyase activity||carbon-oxygen lyase activity||hydro-lyase activity||binding||metal ion binding||ion binding||cation binding||transition metal ion binding	egr00910||egr01100	Nitrogen metabolism||Metabolic pathways
CacGene21992	100.513	3.39273	-4.89497	3.42e-11	DOWN	-	-	--	--	--	--	--	--	--	--
CacGene07492	37.4702	753.802	4.32768	3.58e-11	UP	PF00226:DnaJ domain	sp|Q9SDN0|DNJ20_ARATH Chaperone protein dnaJ 20, chloroplastic OS=Arabidopsis thaliana OX=3702 GN=ATJ20 PE=1 SV=2	--	--	--	--	--	--	--	--
CacGene07399	3.21905	114.453	5.15306	4.09e-11	UP	PF05199:GMC oxidoreductase|PF00732:GMC oxidoreductase	sp|O65709|FAO4A_ARATH Long-chain-alcohol oxidase FAO4A OS=Arabidopsis thaliana OX=3702 GN=FAO4A PE=3 SV=2	GO:0055114||GO:0008152||GO:0008150	oxidation-reduction process||metabolic process||biological_process			GO:0016614||GO:0050660||GO:0003674||GO:0003824||GO:0016491||GO:0000166||GO:0005488||GO:0036094||GO:0043167||GO:0043168||GO:0048037||GO:0050662||GO:0097159||GO:1901265||GO:1901363	oxidoreductase activity, acting on CH-OH group of donors||flavin adenine dinucleotide binding||molecular_function||catalytic activity||oxidoreductase activity||nucleotide binding||binding||small molecule binding||ion binding||anion binding||cofactor binding||coenzyme binding||organic cyclic compound binding||nucleoside phosphate binding||heterocyclic compound binding	--	--
CacGene04117	1169.84	321.958	-1.86064	4.44e-11	DOWN	PF02779:Transketolase, pyrimidine binding domain|PF02780:Transketolase, C-terminal domain|PF13292:1-deoxy-D-xylulose-1-phosphate synthase		GO:0055114||GO:0008152||GO:0008150	oxidation-reduction process||metabolic process||biological_process			GO:0016616||GO:0051287||GO:0003674||GO:0003824||GO:0016491||GO:0016614||GO:0000166||GO:0005488||GO:0036094||GO:0048037||GO:0050662||GO:0097159||GO:1901265||GO:1901363	oxidoreductase activity, acting on the CH-OH group of donors, NAD or NADP as acceptor||NAD binding||molecular_function||catalytic activity||oxidoreductase activity||oxidoreductase activity, acting on CH-OH group of donors||nucleotide binding||binding||small molecule binding||cofactor binding||coenzyme binding||organic cyclic compound binding||nucleoside phosphate binding||heterocyclic compound bi…	egr00260||egr00270||egr01100||egr01110||egr01200||egr01230	Glycine, serine and threonine metabolism||Cysteine and methionine metabolism||Metabolic pathways||Biosynthesis of secondary metabolites||Carbon metabolism||Biosynthesis of amino acids
CacGene18399	263.536	883.884	1.74438	4.54e-11	UP	-	-	--	--	--	--	--	--	--	--
CacGene11350	1369.04	5253.87	1.94003	4.9e-11	UP	PF01344:Kelch motif	sp|Q9LMR5|FK126_ARATH F-box/kelch-repeat protein At1g15670 OS=Arabidopsis thaliana OX=3702 GN=At1g15670 PE=2 SV=1					GO:0005515||GO:0003674||GO:0005488	protein binding||molecular_function||binding	--	--
CacGene16355	575.218	88.2219	-2.70501	5.14e-11	DOWN	PF03081:Exo70 exocyst complex subunit|PF13962:Domain of unknown function|PF12796:Ankyrin repeats (3 copies)	sp|Q8VY27|E70H1_ARATH Exocyst complex component EXO70H1 OS=Arabidopsis thaliana OX=3702 GN=EXO70H1 PE=1 SV=1	GO:0006887||GO:0016192||GO:0046903||GO:0006810||GO:0008150||GO:0009987||GO:0032940||GO:0051179||GO:0051234	exocytosis||vesicle-mediated transport||secretion||transport||biological_process||cellular process||secretion by cell||localization||establishment of localization	GO:0000145||GO:0005622||GO:0005575||GO:0005623||GO:0005737||GO:0005938||GO:0032991||GO:0044424||GO:0044444||GO:0044448||GO:0044464||GO:0071944||GO:0099023||GO:0099568	exocyst||intracellular||cellular_component||cell||cytoplasm||cell cortex||protein-containing complex||intracellular part||cytoplasmic part||cell cortex part||cell part||cell periphery||tethering complex||cytoplasmic region			--	--
CacGene25377	1303.9	18000.7	3.78685	5.15e-11	UP	PF00234:Protease inhibitor/seed storage/LTP family	sp|Q43019|NLTP3_PRUDU Non-specific lipid-transfer protein 3 OS=Prunus dulcis OX=3755 PE=2 SV=1	--	--	--	--	--	--	--	--
novel.1228	84.7192	421.587	2.31976	5.24e-11	UP	-	-	--	--	--	--	--	--	--	--
CacGene18118	473.691	55.2375	-3.10257	5.49e-11	DOWN	PF00704:Glycosyl hydrolases family 18	sp|O81862|CHIC_ARATH Class V chitinase OS=Arabidopsis thaliana OX=3702 GN=ChiC PE=1 SV=1	GO:0005975||GO:0008152||GO:0008150||GO:0044238||GO:0071704	carbohydrate metabolic process||metabolic process||biological_process||primary metabolic process||organic substance metabolic process					egr00520||egr01100	Amino sugar and nucleotide sugar metabolism||Metabolic pathways
CacGene11025	210.186	956.608	2.18739	5.73e-11	UP	PF00407:Pathogenesis-related protein Bet v I family	sp|D0E0C7|FRA13_FRAAN Major strawberry allergen Fra a 1-3 OS=Fragaria ananassa OX=3747 GN=FRAA3 PE=1 SV=1	GO:0006952||GO:0006950||GO:0008150||GO:0050896	defense response||response to stress||biological_process||response to stimulus					--	--
novel.1724	200.314	915.469	2.19143	6.51e-11	UP	-	-	--	--	--	--	--	--	--	--
CacGene26937	88.1019	0	-8.88978	7.66e-11	DOWN	PF00657:GDSL-like Lipase/Acylhydrolase	sp|Q9ZQI3|GDL40_ARATH GDSL esterase/lipase At2g27360 OS=Arabidopsis thaliana OX=3702 GN=At2g27360 PE=2 SV=1					GO:0016788||GO:0003674||GO:0003824||GO:0016787	hydrolase activity, acting on ester bonds||molecular_function||catalytic activity||hydrolase activity	--	--
novel.273	9.68086	223.237	4.54044	7.77e-11	UP	-	-	--	--	--	--	--	--	--	--
CacGene07098	1597.71	4823.92	1.59444	8.32e-11	UP	PF01697:Glycosyltransferase family 92	sp|B9S2H4|Y232_RICCO Glycosyltransferase family 92 protein RCOM_0530710 OS=Ricinus communis OX=3988 GN=RCOM_0699480 PE=3 SV=1	--	--	--	--	--	--	--	--
CacGene19433	169.084	0.323786	-8.86923	8.65e-11	DOWN	PF00067:Cytochrome P450	sp|H2DH18|C7A12_PANGI Cytochrome P450 CYP736A12 OS=Panax ginseng OX=4054 PE=2 SV=1	GO:0055114||GO:0008152||GO:0008150	oxidation-reduction process||metabolic process||biological_process			GO:0005506||GO:0016705||GO:0020037||GO:0003674||GO:0005488||GO:0046872||GO:0043167||GO:0043169||GO:0046914||GO:0003824||GO:0016491||GO:0046906||GO:0048037||GO:0097159||GO:1901363	iron ion binding||oxidoreductase activity, acting on paired donors, with incorporation or reduction of molecular oxygen||heme binding||molecular_function||binding||metal ion binding||ion binding||cation binding||transition metal ion binding||catalytic activity||oxidoreductase activity||tetrapyrrole binding||cofactor binding||organic cyclic compound binding||heterocyclic compound binding	--	--
CacGene07196	358.601	10.6257	-5.08186	8.9e-11	DOWN	PF02458:Transferase family	sp|Q9ZWR8|ANTA_GENTR Anthocyanin 5-aromatic acyltransferase OS=Gentiana triflora OX=55190 PE=1 SV=1					GO:0016747||GO:0003674||GO:0003824||GO:0016740||GO:0016746	transferase activity, transferring acyl groups other than amino-acyl groups||molecular_function||catalytic activity||transferase activity||transferase activity, transferring acyl groups	--	--
CacGene25686	854.389	35.4621	-4.59198	1.04e-10	DOWN	PF17144:Ribosomal large subunit proteins 60S L5, and 50S L18|PF14204:Ribosomal L18 C-terminal region	sp|Q6UNT2|RL5_CUCSA 60S ribosomal protein L5 OS=Cucumis sativus OX=3659 GN=RPL5 PE=2 SV=1	GO:0006412||GO:0008152||GO:0006518||GO:0006807||GO:0008150||GO:0009058||GO:0009059||GO:0009987||GO:0010467||GO:0019538||GO:0034641||GO:0034645||GO:0043043||GO:0043170||GO:0043603||GO:0043604||GO:0044237||GO:0044238||GO:0044249||GO:0044260||GO:0044267||GO:0044271||GO:0071704||GO:1901564||GO:1901566||GO:1901576	translation||metabolic process||peptide metabolic process||nitrogen compound metabolic process||biological_process||biosynthetic process||macromolecule biosynthetic process||cellular process||gene expression||protein metabolic process||cellular nitrogen compound metabolic process||cellular macromolecule biosynthetic process||peptide biosynthetic process||macromolecule metabolic process||cellular …	GO:0005622||GO:0005840||GO:0005575||GO:0005623||GO:0044464||GO:0005737||GO:0032991||GO:0043226||GO:0043228||GO:0043229||GO:0043232||GO:0044424||GO:0044444||GO:1990904	intracellular||ribosome||cellular_component||cell||cell part||cytoplasm||protein-containing complex||organelle||non-membrane-bounded organelle||intracellular organelle||intracellular non-membrane-bounded organelle||intracellular part||cytoplasmic part||ribonucleoprotein complex	GO:0003735||GO:0008097||GO:0003674||GO:0005198||GO:0003676||GO:0003723||GO:0005488||GO:0019843||GO:0097159||GO:1901363	structural constituent of ribosome||5S rRNA binding||molecular_function||structural molecule activity||nucleic acid binding||RNA binding||binding||rRNA binding||organic cyclic compound binding||heterocyclic compound binding	egr03010	Ribosome
CacGene11489	1018.31	2732.05	1.42351	1.11e-10	UP	-	-	--	--	--	--	--	--	--	--
CacGene18740	725.313	215.931	-1.74851	1.16e-10	DOWN	PF00722:Glycosyl hydrolases family 16|PF06955:Xyloglucan endo-transglycosylase (XET) C-terminus	sp|Q9FUS8|GSTUH_ARATH Glutathione S-transferase U17 OS=Arabidopsis thaliana OX=3702 GN=GSTU17 PE=2 SV=1					GO:0005515||GO:0003674||GO:0005488	protein binding||molecular_function||binding	egr00480||egr01100	Glutathione metabolism||Metabolic pathways
CacGene07242	602.289	186.866	-1.68749	1.19e-10	DOWN	PF12819:Malectin-like domain	sp|C0LGI2|Y1677_ARATH Probable LRR receptor-like serine/threonine-protein kinase At1g67720 OS=Arabidopsis thaliana OX=3702 GN=At1g67720 PE=1 SV=1	--	--	--	--	--	--	--	--
CacGene20163	105.78	1227.68	3.5349	1.25e-10	UP	-	-	--	--	--	--	--	--	--	--
CacGene03844	12.3237	489.611	5.31319	1.48e-10	UP	PF00257:Dehydrin	-	GO:0009415||GO:0001101||GO:0008150||GO:0009628||GO:0010035||GO:0042221||GO:0050896||GO:1901700	response to water||response to acid chemical||biological_process||response to abiotic stimulus||response to inorganic substance||response to chemical||response to stimulus||response to oxygen-containing compound					--	--
CacGene10337	14.7482	156.573	3.3983	1.49e-10	UP	-	-					GO:0005515||GO:0003674||GO:0005488	protein binding||molecular_function||binding	--	--
CacGene22316	20.9343	242.364	3.52935	1.5e-10	UP	PF02779:Transketolase, pyrimidine binding domain|PF02780:Transketolase, C-terminal domain|PF13292:2-deoxy-U-xylulose-3-phosphate synthase	sp|Q8GYX3|MP705_ARATH Microtubule-associated protein 70-5 OS=Arabidopsis thaliana OX=3702 GN=MAP70.5 PE=1 SV=1	--	--	--	--	--	--	--	--
CacGene05364	108.888	1454.91	3.7402	1.51e-10	UP	PF06813:Nodulin-like	-	--	--	--	--	--	--	--	--
CacGene16931	0.868448	159.135	7.4097	1.64e-10	UP	PF02779:Transketolase, pyrimidine binding domain|PF02780:Transketolase, C-terminal domain|PF13292:0-deoxy-U-xylulose-7-phosphate synthase	sp|Q7XR02|IBH1_ORYSJ Transcription factor IBH1 OS=Oryza sativa subsp. japonica OX=39947 GN=IBH1 PE=1 SV=2	--	--	--	--	--	--	--	--
CacGene24552	34.899	389.744	3.47564	1.68e-10	UP	PF06414:Zeta toxin	sp|Q0WUY1|NADKC_ARATH Calmodulin calcium-dependent NAD kinase OS=Arabidopsis thaliana OX=3702 GN=NADKC PE=1 SV=1					GO:0005524||GO:0016301||GO:0000166||GO:0003674||GO:0005488||GO:0008144||GO:0017076||GO:0030554||GO:0032553||GO:0032555||GO:0032559||GO:0035639||GO:0036094||GO:0043167||GO:0043168||GO:0097159||GO:0097367||GO:1901265||GO:1901363||GO:0003824||GO:0016740||GO:0016772	ATP binding||kinase activity||nucleotide binding||molecular_function||binding||drug binding||purine nucleotide binding||adenyl nucleotide binding||ribonucleotide binding||purine ribonucleotide binding||adenyl ribonucleotide binding||purine ribonucleoside triphosphate binding||small molecule binding||ion binding||anion binding||organic cyclic compound binding||carbohydrate derivative binding||nucl…	--	--
CacGene18543	3.8333	145.569	5.24413	1.72e-10	UP	PF00534:Glycosyl transferases group 1|PF05116:Sucrose-6F-phosphate phosphohydrolase|PF00862:Sucrose synthase	sp|F4JLK2|SPSA4_ARATH Probable sucrose-phosphate synthase 4 OS=Arabidopsis thaliana OX=3702 GN=SPS4 PE=1 SV=1	GO:0005985||GO:0008152||GO:0005975||GO:0005984||GO:0008150||GO:0009311||GO:0009987||GO:0044237||GO:0044238||GO:0044262||GO:0071704	sucrose metabolic process||metabolic process||carbohydrate metabolic process||disaccharide metabolic process||biological_process||oligosaccharide metabolic process||cellular process||cellular metabolic process||primary metabolic process||cellular carbohydrate metabolic process||organic substance metabolic process			GO:0016157||GO:0003674||GO:0003824||GO:0008194||GO:0016740||GO:0016757||GO:0016758||GO:0035251||GO:0046527	sucrose synthase activity||molecular_function||catalytic activity||UDP-glycosyltransferase activity||transferase activity||transferase activity, transferring glycosyl groups||transferase activity, transferring hexosyl groups||UDP-glucosyltransferase activity||glucosyltransferase activity	egr00500||egr01100||egr01110	Starch and sucrose metabolism||Metabolic pathways||Biosynthesis of secondary metabolites
CacGene17280	392.36	123.641	-1.66695	1.96e-10	DOWN	PF02779:Transketolase, pyrimidine binding domain|PF02780:Transketolase, C-terminal domain|PF13292:3-deoxy-D-xylulose-1-phosphate synthase	sp|Q9ZUF6|SBT18_ARATH Subtilisin-like protease SBT1.8 OS=Arabidopsis thaliana OX=3702 GN=SBT1.8 PE=1 SV=1	GO:0006508||GO:0008152||GO:0006807||GO:0008150||GO:0019538||GO:0043170||GO:0044238||GO:0071704||GO:1901564	proteolysis||metabolic process||nitrogen compound metabolic process||biological_process||protein metabolic process||macromolecule metabolic process||primary metabolic process||organic substance metabolic process||organonitrogen compound metabolic process			GO:0004252||GO:0003674||GO:0003824||GO:0004175||GO:0008236||GO:0008233||GO:0070011||GO:0016787||GO:0017171||GO:0140096	serine-type endopeptidase activity||molecular_function||catalytic activity||endopeptidase activity||serine-type peptidase activity||peptidase activity||peptidase activity, acting on L-amino acid peptides||hydrolase activity||serine hydrolase activity||catalytic activity, acting on a protein	--	--
CacGene00133	236.303	1749.88	2.88902	2.11e-10	UP	PF04043:Plant invertase/pectin methylesterase inhibitor	sp|Q9SB37|PMEI7_ARATH Pectinesterase inhibitor 7 OS=Arabidopsis thaliana OX=3702 GN=PMEI7 PE=2 SV=1					GO:0004857||GO:0003674||GO:0030234||GO:0098772	enzyme inhibitor activity||molecular_function||enzyme regulator activity||molecular function regulator	--	--
CacGene25682	843.291	2400.24	1.50905	2.13e-10	UP	-	-	--	--	--	--	--	--	--	--
CacGene11273	219.88	1075.69	2.2897	2.14e-10	UP	PF08472:Sucrose-6-phosphate phosphohydrolase C-terminal|PF01061:ABC-2 type transporter|PF05116:Sucrose-6F-phosphate phosphohydrolase	sp|Q93YS4|AB22G_ARATH ABC transporter G family member 22 OS=Arabidopsis thaliana OX=3702 GN=ABCG22 PE=1 SV=1	GO:0005986||GO:0008152||GO:0005975||GO:0005984||GO:0005985||GO:0008150||GO:0009058||GO:0009311||GO:0009312||GO:0009987||GO:0016051||GO:0034637||GO:0044237||GO:0044238||GO:0044249||GO:0044262||GO:0046351||GO:0071704||GO:1901576	sucrose biosynthetic process||metabolic process||carbohydrate metabolic process||disaccharide metabolic process||sucrose metabolic process||biological_process||biosynthetic process||oligosaccharide metabolic process||oligosaccharide biosynthetic process||cellular process||carbohydrate biosynthetic process||cellular carbohydrate biosynthetic process||cellular metabolic process||primary metabolic p…	GO:0016020||GO:0005575	membrane||cellular_component	GO:0050307||GO:0003674||GO:0003824||GO:0016787||GO:0016788||GO:0016791||GO:0019203||GO:0042578||GO:0050308	sucrose-phosphate phosphatase activity||molecular_function||catalytic activity||hydrolase activity||hydrolase activity, acting on ester bonds||phosphatase activity||carbohydrate phosphatase activity||phosphoric ester hydrolase activity||sugar-phosphatase activity	egr02010	ABC transporters
novel.109	0	61.7054	8.43307	2.22e-10	UP	PF15906:Zinc-finger of nitric oxide synthase-interacting protein	sp|Q9SY88|CSU1_ARATH E3 ubiquitin-protein ligase CSU1 OS=Arabidopsis thaliana OX=3702 GN=CSU1 PE=1 SV=1	--	--	--	--	--	--	--	--
CacGene09186	2072.88	349.107	-2.57062	2.43e-10	DOWN	-	-	--	--	--	--	--	--	--	--
CacGene08674	8.6569	180.206	4.36418	2.59e-10	UP	PF03140:Plant protein of unknown function	sp|Q9SD53|Y3720_ARATH UPF0481 protein At3g47200 OS=Arabidopsis thaliana OX=3702 GN=At3g47200 PE=2 SV=1	--	--	--	--	--	--	--	--
novel.481	194.833	1434.3	2.88014	2.59e-10	UP	-	-	--	--	--	--	--	--	--	--
CacGene27629	765.312	14850.5	4.27842	2.78e-10	UP	PF00722:Glycosyl hydrolases family 16|PF06955:Xyloglucan endo-transglycosylase (XET) C-terminus	sp|Q8LER3|XTH7_ARATH Probable xyloglucan endotransglucosylase/hydrolase protein 7 OS=Arabidopsis thaliana OX=3702 GN=XTH7 PE=2 SV=2	GO:0005975||GO:0006073||GO:0008152||GO:0008150||GO:0044238||GO:0071704||GO:0005976||GO:0009987||GO:0043170||GO:0044042||GO:0044237||GO:0044260||GO:0044262||GO:0044264	carbohydrate metabolic process||cellular glucan metabolic process||metabolic process||biological_process||primary metabolic process||organic substance metabolic process||polysaccharide metabolic process||cellular process||macromolecule metabolic process||glucan metabolic process||cellular metabolic process||cellular macromolecule metabolic process||cellular carbohydrate metabolic process||cellula…	GO:0005618||GO:0048046||GO:0005575||GO:0005623||GO:0030312||GO:0044464||GO:0071944||GO:0005576	cell wall||apoplast||cellular_component||cell||external encapsulating structure||cell part||cell periphery||extracellular region	GO:0004553||GO:0016762||GO:0003674||GO:0003824||GO:0016787||GO:0016798||GO:0016740||GO:0016757||GO:0016758||GO:0046527	hydrolase activity, hydrolyzing O-glycosyl compounds||xyloglucan:xyloglucosyl transferase activity||molecular_function||catalytic activity||hydrolase activity||hydrolase activity, acting on glycosyl bonds||transferase activity||transferase activity, transferring glycosyl groups||transferase activity, transferring hexosyl groups||glucosyltransferase activity	--	--
CacGene26792	192.395	4.61709	-5.40904	2.79e-10	DOWN	PF03547:Membrane transport protein	sp|Q9LZN2|PILS6_ARATH Protein PIN-LIKES 6 OS=Arabidopsis thaliana OX=3702 GN=PILS6 PE=2 SV=1	GO:0055085||GO:0006810||GO:0008150||GO:0051179||GO:0051234	transmembrane transport||transport||biological_process||localization||establishment of localization	GO:0016021||GO:0005575||GO:0016020||GO:0031224||GO:0044425	integral component of membrane||cellular_component||membrane||intrinsic component of membrane||membrane part			--	--
CacGene09811	40.8247	385.766	3.24606	2.87e-10	UP	-	-					GO:0005515||GO:0003674||GO:0005488	protein binding||molecular_function||binding	--	--
CacGene06419	410.266	1505.09	1.8752	2.92e-10	UP	PF00535:Glycosyl transferase family 2|PF03107:C1 domain	sp|Q9Y673|ALG5_HUMAN Dolichyl-phosphate beta-glucosyltransferase OS=Homo sapiens OX=9606 GN=ALG5 PE=1 SV=1	--	--	--	--	--	--	egr00510||egr01100	N-Glycan biosynthesis||Metabolic pathways
CacGene01578	2576.33	18914.5	2.87604	2.93e-10	UP	PF14226:non-haem dioxygenase in morphine synthesis N-terminal|PF03171:2OG-Fe(II) oxygenase superfamily	sp|P31237|ACCO_ACTDE 1-aminocyclopropane-1-carboxylate oxidase OS=Actinidia deliciosa OX=3627 GN=ACO PE=2 SV=1	GO:0055114||GO:0008152||GO:0008150	oxidation-reduction process||metabolic process||biological_process			GO:0016491||GO:0003674||GO:0003824	oxidoreductase activity||molecular_function||catalytic activity	egr00270||egr01100||egr01110	Cysteine and methionine metabolism||Metabolic pathways||Biosynthesis of secondary metabolites
CacGene00355	247.081	6565.67	4.73114	2.97e-10	UP	PF07690:Major Facilitator Superfamily	-	GO:0055085||GO:0006810||GO:0008150||GO:0051179||GO:0051234	transmembrane transport||transport||biological_process||localization||establishment of localization	GO:0016021||GO:0005575||GO:0016020||GO:0031224||GO:0044425	integral component of membrane||cellular_component||membrane||intrinsic component of membrane||membrane part			--	--
CacGene25191	159.738	23.4958	-2.76606	3.17e-10	DOWN	PF00332:Glycosyl hydrolases family 17|PF07983:X8 domain	sp|Q6NKW9|E138_ARATH Glucan endo-1,3-beta-glucosidase 8 OS=Arabidopsis thaliana OX=3702 GN=At1g64760 PE=2 SV=2	GO:0005975||GO:0008152||GO:0008150||GO:0044238||GO:0071704	carbohydrate metabolic process||metabolic process||biological_process||primary metabolic process||organic substance metabolic process			GO:0004553||GO:0003674||GO:0003824||GO:0016787||GO:0016798	hydrolase activity, hydrolyzing O-glycosyl compounds||molecular_function||catalytic activity||hydrolase activity||hydrolase activity, acting on glycosyl bonds	--	--
CacGene24079	65.4535	378.773	2.52823	3.33e-10	UP	PF00201:UDP-glucoronosyl and UDP-glucosyl transferase	sp|Q9ZSK5|ZOG_PHALU Zeatin O-glucosyltransferase OS=Phaseolus lunatus OX=3884 GN=ZOG1 PE=2 SV=1					GO:0016758||GO:0003674||GO:0003824||GO:0016740||GO:0016757	transferase activity, transferring hexosyl groups||molecular_function||catalytic activity||transferase activity||transferase activity, transferring glycosyl groups	egr00908||egr01110	Zeatin biosynthesis||Biosynthesis of secondary metabolites
CacGene03091	60.525	519.124	3.1017	3.43e-10	UP	-	-	--	--	--	--	--	--	--	--
CacGene11806	597.544	2136.86	1.83789	3.57e-10	UP	PF04618:HD-ZIP protein N terminus|PF02183:Homeobox associated leucine zipper|PF00046:Homeodomain	sp|Q05466|HAT4_ARATH Homeobox-leucine zipper protein HAT4 OS=Arabidopsis thaliana OX=3702 GN=HAT4 PE=1 SV=1	GO:0006355||GO:0008152||GO:0006139||GO:0006351||GO:0006725||GO:0006807||GO:0008150||GO:0009058||GO:0009059||GO:0009889||GO:0009987||GO:0010467||GO:0010468||GO:0010556||GO:0016070||GO:0018130||GO:0019219||GO:0019222||GO:0019438||GO:0031323||GO:0031326||GO:0032774||GO:0034641||GO:0034645||GO:0034654||GO:0043170||GO:0044237||GO:0044238||GO:0044249||GO:0044260||GO:0044271||GO:0046483||GO:0050789||GO:…	regulation of transcription, DNA-templated||metabolic process||nucleobase-containing compound metabolic process||transcription, DNA-templated||cellular aromatic compound metabolic process||nitrogen compound metabolic process||biological_process||biosynthetic process||macromolecule biosynthetic process||regulation of biosynthetic process||cellular process||gene expression||regulation of gene expre…	GO:0005634||GO:0005622||GO:0005575||GO:0005623||GO:0043231||GO:0043226||GO:0043227||GO:0043229||GO:0044424||GO:0044464	nucleus||intracellular||cellular_component||cell||intracellular membrane-bounded organelle||organelle||membrane-bounded organelle||intracellular organelle||intracellular part||cell part	GO:0003700||GO:0043565||GO:0003677||GO:0003674||GO:0140110||GO:0003676||GO:0005488||GO:0097159||GO:1901363	DNA binding transcription factor activity||sequence-specific DNA binding||DNA binding||molecular_function||transcription regulator activity||nucleic acid binding||binding||organic cyclic compound binding||heterocyclic compound binding	--	--
CacGene07463	9.96264	174.759	4.11903	3.61e-10	UP	-	sp|Q9SKX1|IBH1_ARATH Transcription factor IBH1 OS=Arabidopsis thaliana OX=3702 GN=IBH1 PE=1 SV=1	--	--	--	--	--	--	--	--
CacGene07083	1699.08	6598.18	1.95723	3.62e-10	UP	PF02798:Glutathione S-transferase, N-terminal domain|PF00043:Glutathione S-transferase, C-terminal domain	sp|Q9FUS8|GSTUH_ARATH Glutathione S-transferase U17 OS=Arabidopsis thaliana OX=3702 GN=GSTU17 PE=2 SV=1					GO:0005515||GO:0003674||GO:0005488	protein binding||molecular_function||binding	egr00480||egr01100	Glutathione metabolism||Metabolic pathways
CacGene10492	607.34	3574.99	2.55738	3.84e-10	UP	PF08263:Leucine rich repeat N-terminal domain	sp|Q9C6A6|RLP13_ARATH Receptor-like protein 13 OS=Arabidopsis thaliana OX=3702 GN=RLP13 PE=3 SV=1	--	--	--	--	--	--	--	--
CacGene07941	218	1089.66	2.32165	3.87e-10	UP	PF00657:GDSL-like Lipase/Acylhydrolase	sp|Q9FJ40|GDL86_ARATH GDSL esterase/lipase At5g45960 OS=Arabidopsis thaliana OX=3702 GN=At5g45960 PE=2 SV=1					GO:0016788||GO:0003674||GO:0003824||GO:0016787	hydrolase activity, acting on ester bonds||molecular_function||catalytic activity||hydrolase activity	--	--
CacGene14598	152.777	21.2293	-2.85052	3.92e-10	DOWN	PF03514:GRAS domain family	sp|Q9CAN3|SCL28_ARATH Scarecrow-like protein 28 OS=Arabidopsis thaliana OX=3702 GN=SCL28 PE=1 SV=1	--	--	--	--	--	--	--	--
CacGene13723	199.797	28.6623	-2.80452	4.38e-10	DOWN	-	-	--	--	--	--	--	--	--	--
CacGene02286	292.57	769.036	1.39404	5.04e-10	UP	-	-	--	--	--	--	--	--	--	--
CacGene13475	472.294	87.8634	-2.42867	5.09e-10	DOWN	PF02779:Transketolase, pyrimidine binding domain|PF02780:Transketolase, C-terminal domain|PF13292:4-deoxy-D-xylulose-2-phosphate synthase	sp|Q9AQW1|REL2_ORYSJ Protein ROLLING AND ERECT LEAF 2 OS=Oryza sativa subsp. japonica OX=39947 GN=REL2 PE=2 SV=1	--	--	--	--	--	--	--	--
CacGene06894	96.078	562.506	2.54881	5.1e-10	UP	PF04253:Transferrin receptor-like dimerisation domain|PF04389:Peptidase family M28|PF02225:PA domain	sp|Q7Y228|LAMP1_ARATH Probable glutamate carboxypeptidase LAMP1 OS=Arabidopsis thaliana OX=3702 GN=LAMP1 PE=2 SV=1	--	--	--	--	--	--	--	--
CacGene03477	3748.58	924.732	-2.01951	5.46e-10	DOWN	PF00141:Peroxidase	sp|Q9SB81|PER42_ARATH Peroxidase 42 OS=Arabidopsis thaliana OX=3702 GN=PER42 PE=1 SV=2	GO:0006979||GO:0055114||GO:0006950||GO:0008150||GO:0050896||GO:0008152	response to oxidative stress||oxidation-reduction process||response to stress||biological_process||response to stimulus||metabolic process			GO:0004601||GO:0020037||GO:0003674||GO:0003824||GO:0016491||GO:0016209||GO:0016684||GO:0005488||GO:0046906||GO:0048037||GO:0097159||GO:1901363	peroxidase activity||heme binding||molecular_function||catalytic activity||oxidoreductase activity||antioxidant activity||oxidoreductase activity, acting on peroxide as acceptor||binding||tetrapyrrole binding||cofactor binding||organic cyclic compound binding||heterocyclic compound binding	egr00940||egr01100||egr01110	Phenylpropanoid biosynthesis||Metabolic pathways||Biosynthesis of secondary metabolites
novel.563	108.537	627.813	2.53226	6.11e-10	UP	-	-	--	--	--	--	--	--	--	--
novel.605	76.2746	2.05178	-5.23184	6.5e-10	DOWN	-	-	--	--	--	--	--	--	--	--
CacGene15259	236.739	3.93002	-5.90017	6.57e-10	DOWN	PF03169:OPT oligopeptide transporter protein	sp|Q9SHY2|YSL7_ARATH Probable metal-nicotianamine transporter YSL7 OS=Arabidopsis thaliana OX=3702 GN=YSL7 PE=2 SV=1	GO:0055085||GO:0006810||GO:0008150||GO:0051179||GO:0051234	transmembrane transport||transport||biological_process||localization||establishment of localization					--	--
CacGene27100	82.2869	3.37652	-4.60914	7.12e-10	DOWN	PF01565:FAD binding domain	sp|Q9SVG3|BBE21_ARATH Berberine bridge enzyme-like 21 OS=Arabidopsis thaliana OX=3702 GN=At4g20840 PE=2 SV=1	GO:0055114||GO:0008152||GO:0008150	oxidation-reduction process||metabolic process||biological_process			GO:0016491||GO:0050660||GO:0003674||GO:0003824||GO:0000166||GO:0005488||GO:0036094||GO:0043167||GO:0043168||GO:0048037||GO:0050662||GO:0097159||GO:1901265||GO:1901363	oxidoreductase activity||flavin adenine dinucleotide binding||molecular_function||catalytic activity||nucleotide binding||binding||small molecule binding||ion binding||anion binding||cofactor binding||coenzyme binding||organic cyclic compound binding||nucleoside phosphate binding||heterocyclic compound binding	--	--
novel.1432	0.313746	104.418	8.23007	7.97e-10	UP	-	-	--	--	--	--	--	--	--	--
CacGene09758	237.588	33559.5	7.14198	7.98e-10	UP	-	-	--	--	--	--	--	--	--	--
CacGene24216	3.18377	75.383	4.55655	8.34e-10	UP	PF13855:Leucine rich repeat	-					GO:0005515||GO:0003674||GO:0005488	protein binding||molecular_function||binding	--	--
CacGene18646	45.3027	220.117	2.27421	8.68e-10	UP	PF02779:Transketolase, pyrimidine binding domain|PF02780:Transketolase, C-terminal domain|PF13292:3-deoxy-D-xylulose-5-phosphate synthase	-	--	--	--	--	--	--	--	--
CacGene01707	923.249	6049.42	2.7119	9.74e-10	UP	PF00083:Sugar (and other) transporter	sp|Q41144|STC_RICCO Sugar carrier protein C OS=Ricinus communis OX=3988 GN=STC PE=2 SV=1	GO:0055085||GO:0006810||GO:0008150||GO:0051179||GO:0051234	transmembrane transport||transport||biological_process||localization||establishment of localization	GO:0016021||GO:0005575||GO:0016020||GO:0031224||GO:0044425	integral component of membrane||cellular_component||membrane||intrinsic component of membrane||membrane part	GO:0022857||GO:0003674||GO:0005215	transmembrane transporter activity||molecular_function||transporter activity	--	--
CacGene12744	258.496	905.135	1.80734	9.89e-10	UP	PF04570:zinc-finger of the FCS-type, C2-C2	sp|Q9SGZ8|FLZ6_ARATH FCS-Like Zinc finger 6 OS=Arabidopsis thaliana OX=3702 GN=FLZ6 PE=1 SV=1	--	--	--	--	--	--	--	--
CacGene27583	1.80969	68.4942	5.17746	1.08e-09	UP	PF01554:MatE	sp|Q9LVD9|DTX40_ARATH Protein DETOXIFICATION 40 OS=Arabidopsis thaliana OX=3702 GN=DTX40 PE=1 SV=1	GO:0006855||GO:0055085||GO:0006810||GO:0008150||GO:0042493||GO:0015893||GO:0042221||GO:0050896||GO:0051179||GO:0051234	drug transmembrane transport||transmembrane transport||transport||biological_process||response to drug||drug transport||response to chemical||response to stimulus||localization||establishment of localization	GO:0016020||GO:0005575	membrane||cellular_component	GO:0015238||GO:0015297||GO:0003674||GO:0005215||GO:0022857||GO:0015291||GO:0022804	drug transmembrane transporter activity||antiporter activity||molecular_function||transporter activity||transmembrane transporter activity||secondary active transmembrane transporter activity||active transmembrane transporter activity	--	--
CacGene24946	97.9325	557.746	2.50649	1.08e-09	UP	-	-	--	--	--	--	--	--	--	--
CacGene27620	103.684	0	-9.12588	1.14e-09	DOWN	-	-	--	--	--	--	--	--	--	--
novel.1254	568.25	2442.91	2.1046	1.16e-09	UP	PF08449:UAA transporter family	sp|Q9LDX3|UTR4_ARATH UDP-galactose/UDP-glucose transporter 4 OS=Arabidopsis thaliana OX=3702 GN=UTR4 PE=2 SV=1	GO:0055085||GO:0006810||GO:0008150||GO:0051179||GO:0051234	transmembrane transport||transport||biological_process||localization||establishment of localization					--	--
CacGene16243	399.981	1973.57	2.30384	1.17e-09	UP	-	sp|Q9LZF1|HIP6_ARATH Heavy metal-associated isoprenylated plant protein 6 OS=Arabidopsis thaliana OX=3702 GN=HIPP06 PE=1 SV=1	--	--	--	--	--	--	--	--
CacGene07474	309.135	37.1137	-3.05791	1.19e-09	DOWN	PF00069:Protein kinase domain	sp|Q9LSF1|OXI1_ARATH Serine/threonine-protein kinase OXI1 OS=Arabidopsis thaliana OX=3702 GN=OXI1 PE=1 SV=1	GO:0006468||GO:0008152||GO:0006464||GO:0006793||GO:0006796||GO:0006807||GO:0008150||GO:0009987||GO:0016310||GO:0019538||GO:0036211||GO:0043170||GO:0043412||GO:0044237||GO:0044238||GO:0044260||GO:0044267||GO:0071704||GO:1901564	protein phosphorylation||metabolic process||cellular protein modification process||phosphorus metabolic process||phosphate-containing compound metabolic process||nitrogen compound metabolic process||biological_process||cellular process||phosphorylation||protein metabolic process||protein modification process||macromolecule metabolic process||macromolecule modification||cellular metabolic process|…			GO:0004672||GO:0005524||GO:0003674||GO:0003824||GO:0016301||GO:0016740||GO:0016772||GO:0016773||GO:0140096||GO:0000166||GO:0005488||GO:0008144||GO:0017076||GO:0030554||GO:0032553||GO:0032555||GO:0032559||GO:0035639||GO:0036094||GO:0043167||GO:0043168||GO:0097159||GO:0097367||GO:1901265||GO:1901363	protein kinase activity||ATP binding||molecular_function||catalytic activity||kinase activity||transferase activity||transferase activity, transferring phosphorus-containing groups||phosphotransferase activity, alcohol group as acceptor||catalytic activity, acting on a protein||nucleotide binding||binding||drug binding||purine nucleotide binding||adenyl nucleotide binding||ribonucleotide binding|…	egr04016	MAPK signaling pathway - plant
CacGene10920	3.34091	193.972	5.82906	1.2e-09	UP	PF02779:Transketolase, pyrimidine binding domain|PF02780:Transketolase, C-terminal domain|PF13292:3-deoxy-U-xylulose-5-phosphate synthase	sp|Q9FNL7|PTR3_ARATH Protein NRT1/ PTR FAMILY 5.2 OS=Arabidopsis thaliana OX=3702 GN=NPF5.2 PE=2 SV=1	GO:0055085||GO:0006810||GO:0008150||GO:0051179||GO:0051234	transmembrane transport||transport||biological_process||localization||establishment of localization	GO:0016020||GO:0005575	membrane||cellular_component	GO:0022857||GO:0003674||GO:0005215	transmembrane transporter activity||molecular_function||transporter activity	--	--
CacGene00516	2270.99	8092.93	1.83313	1.29e-09	UP	PF00266:Aminotransferase class-V	sp|Q56YA5|SGAT_ARATH Serine--glyoxylate aminotransferase OS=Arabidopsis thaliana OX=3702 GN=AGT1 PE=1 SV=2	--	--	--	--	--	--	egr00250||egr00260||egr00630||egr01100||egr01110||egr01200||egr04146	Alanine, aspartate and glutamate metabolism||Glycine, serine and threonine metabolism||Glyoxylate and dicarboxylate metabolism||Metabolic pathways||Biosynthesis of secondary metabolites||Carbon metabolism||Peroxisome
CacGene11819	3890.08	12711.9	1.70816	1.43e-09	UP	PF02779:Transketolase, pyrimidine binding domain|PF02780:Transketolase, C-terminal domain|PF13292:3-deoxy-U-xylulose-1-phosphate synthase		GO:0006351||GO:0006355||GO:0008152||GO:0006139||GO:0006725||GO:0006807||GO:0008150||GO:0009058||GO:0009059||GO:0009987||GO:0010467||GO:0016070||GO:0018130||GO:0019438||GO:0032774||GO:0034641||GO:0034645||GO:0034654||GO:0043170||GO:0044237||GO:0044238||GO:0044249||GO:0044260||GO:0044271||GO:0046483||GO:0071704||GO:0090304||GO:0097659||GO:1901360||GO:1901362||GO:1901576||GO:0009889||GO:0010468||GO:…	transcription, DNA-templated||regulation of transcription, DNA-templated||metabolic process||nucleobase-containing compound metabolic process||cellular aromatic compound metabolic process||nitrogen compound metabolic process||biological_process||biosynthetic process||macromolecule biosynthetic process||cellular process||gene expression||RNA metabolic process||heterocycle biosynthetic process||aro…			GO:0003677||GO:0003899||GO:0003700||GO:0003674||GO:0003676||GO:0005488||GO:0097159||GO:1901363||GO:0003824||GO:0016740||GO:0016772||GO:0016779||GO:0034062||GO:0097747||GO:0140098||GO:0140110	DNA binding||DNA-directed 5'-3' RNA polymerase activity||DNA binding transcription factor activity||molecular_function||nucleic acid binding||binding||organic cyclic compound binding||heterocyclic compound binding||catalytic activity||transferase activity||transferase activity, transferring phosphorus-containing groups||nucleotidyltransferase activity||5'-3' RNA polymerase activity||RNA polymeras…	--	--
CacGene15547	134.266	1318.91	3.29456	1.55e-09	UP	-	-	--	--	--	--	--	--	--	--
CacGene21362	33.6622	330.627	3.28829	1.63e-09	UP	PF00106:short chain dehydrogenase	sp|Q9X248|FABG_THEMA 3-oxoacyl-[acyl-carrier-protein] reductase FabG OS=Thermotoga maritima (strain ATCC 43589 / DSM 3109 / JCM 10099 / NBRC 100826 / MSB8) OX=243274 GN=fabG PE=3 SV=1	--	--	--	--	--	--	--	--
novel.620	33.7901	327.781	3.27128	1.81e-09	UP	-	-	--	--	--	--	--	--	--	--
CacGene06999	2.36439	4078.89	10.7313	1.84e-09	UP	-	-	--	--	--	--	--	--	--	--
CacGene05409	254.128	1940.25	2.93221	1.9e-09	UP	PF01925:Sulfite exporter TauE/SafE	sp|Q8S9J0|TAUE4_ARATH Sulfite exporter TauE/SafE family protein 4 OS=Arabidopsis thaliana OX=3702 GN=At2g36630 PE=2 SV=1			GO:0016021||GO:0005575||GO:0016020||GO:0031224||GO:0044425	integral component of membrane||cellular_component||membrane||intrinsic component of membrane||membrane part			--	--
CacGene09012	1099.31	2919.01	1.40926	2.01e-09	UP	PF02779:Transketolase, pyrimidine binding domain|PF02780:Transketolase, C-terminal domain|PF13292:1-deoxy-U-xylulose-1-phosphate synthase	sp|Q5JL96|ZFP34_ORYSJ Probable E3 ubiquitin-protein ligase RZFP34 OS=Oryza sativa subsp. japonica OX=39947 GN=RZFP34 PE=2 SV=1					GO:0008270||GO:0003674||GO:0005488||GO:0046872||GO:0043167||GO:0043169||GO:0046914	zinc ion binding||molecular_function||binding||metal ion binding||ion binding||cation binding||transition metal ion binding	egr04120	Ubiquitin mediated proteolysis
CacGene20700	518.536	127.992	-2.01955	2.03e-09	DOWN	PF13513:HEAT-like repeat|PF03810:Importin-beta N-terminal domain	sp|Q9FJD4|IMB1_ARATH Importin subunit beta-1 OS=Arabidopsis thaliana OX=3702 GN=KPNB1 PE=1 SV=1	GO:0006886||GO:0008104||GO:0006810||GO:0008150||GO:0015031||GO:0015833||GO:0033036||GO:0034613||GO:0042886||GO:0045184||GO:0046907||GO:0051179||GO:0051234||GO:0051641||GO:0051649||GO:0070727||GO:0071702||GO:0071705	intracellular protein transport||protein localization||transport||biological_process||protein transport||peptide transport||macromolecule localization||cellular protein localization||amide transport||establishment of protein localization||intracellular transport||localization||establishment of localization||cellular localization||establishment of localization in cell||cellular macromolecule local…			GO:0008536||GO:0005515||GO:0003674||GO:0005488||GO:0017016||GO:0019899||GO:0031267||GO:0051020	Ran GTPase binding||protein binding||molecular_function||binding||Ras GTPase binding||enzyme binding||small GTPase binding||GTPase binding	egr03013	Nucleocytoplasmic transport
CacGene00690	455.326	59.7099	-2.93066	2.05e-09	DOWN	PF01470:Pyroglutamyl peptidase	-	--	--	--	--	--	--	--	--
CacGene01469	347.092	1449.29	2.0612	2.11e-09	UP	PF01754:A20-like zinc finger|PF01428:AN1-like Zinc finger	sp|Q9LHJ8|SAP5_ARATH Zinc finger A20 and AN1 domain-containing stress-associated protein 5 OS=Arabidopsis thaliana OX=3702 GN=SAP5 PE=2 SV=1					GO:0003677||GO:0008270||GO:0003674||GO:0003676||GO:0005488||GO:0097159||GO:1901363||GO:0046872||GO:0043167||GO:0043169||GO:0046914	DNA binding||zinc ion binding||molecular_function||nucleic acid binding||binding||organic cyclic compound binding||heterocyclic compound binding||metal ion binding||ion binding||cation binding||transition metal ion binding	--	--
CacGene05975	1899.83	91.4738	-4.37532	2.44e-09	DOWN	PF00722:Glycosyl hydrolases family 16|PF06955:Xyloglucan endo-transglycosylase (XET) C-terminus	sp|P32110|GSTX6_SOYBN Probable glutathione S-transferase OS=Glycine max OX=3847 GN=HSP26-A PE=2 SV=1					GO:0005515||GO:0003674||GO:0005488	protein binding||molecular_function||binding	egr00480||egr01100	Glutathione metabolism||Metabolic pathways
CacGene16943	6.36808	122.663	4.23663	2.46e-09	UP	PF00249:Myb-like DNA-binding domain	sp|Q9LDE1|MY108_ARATH Transcription factor MYB108 OS=Arabidopsis thaliana OX=3702 GN=MYB108 PE=1 SV=1					GO:0003677||GO:0003674||GO:0003676||GO:0005488||GO:0097159||GO:1901363	DNA binding||molecular_function||nucleic acid binding||binding||organic cyclic compound binding||heterocyclic compound binding	--	--
CacGene21082	155.106	0.357438	-8.74492	2.48e-09	DOWN	PF03140:Plant protein of unknown function	sp|Q9SD53|Y3720_ARATH UPF0481 protein At3g47200 OS=Arabidopsis thaliana OX=3702 GN=At3g47200 PE=2 SV=1	--	--	--	--	--	--	--	--
CacGene11029	2443.01	9079.67	1.89402	2.49e-09	UP	PF00407:Pathogenesis-related protein Bet v I family	sp|O50001|PRU1_PRUAR Major allergen Pru ar 1 OS=Prunus armeniaca OX=36596 PE=1 SV=1	GO:0006952||GO:0006950||GO:0008150||GO:0050896	defense response||response to stress||biological_process||response to stimulus					--	--
CacGene05928	18.5892	296.117	3.99705	2.5e-09	UP	PF04570:zinc-finger of the FCS-type, C2-C2	sp|Q9SGZ8|FLZ6_ARATH FCS-Like Zinc finger 6 OS=Arabidopsis thaliana OX=3702 GN=FLZ6 PE=1 SV=1	--	--	--	--	--	--	--	--
CacGene13909	198.911	931.949	2.22602	2.75e-09	UP	PF00403:Heavy-metal-associated domain	sp|Q9SZN7|HIP26_ARATH Heavy metal-associated isoprenylated plant protein 26 OS=Arabidopsis thaliana OX=3702 GN=HIPP26 PE=1 SV=1	GO:0030001||GO:0006810||GO:0006811||GO:0006812||GO:0008150||GO:0051179||GO:0051234	metal ion transport||transport||ion transport||cation transport||biological_process||localization||establishment of localization			GO:0046872||GO:0003674||GO:0005488||GO:0043167||GO:0043169	metal ion binding||molecular_function||binding||ion binding||cation binding	--	--
CacGene19873	5.82162	130.286	4.48843	2.92e-09	UP	-	-	--	--	--	--	--	--	--	--
CacGene16102	435.35	5280.46	3.60051	2.99e-09	UP	PF13370:4Fe-4S single cluster domain of Ferredoxin I	sp|P00210|FER1_DESAF Ferredoxin-1 OS=Desulfocurvibacter africanus OX=873 GN=fd1 PE=1 SV=3	--	--	--	--	--	--	--	--
CacGene06152	442.595	106.084	-2.05915	3.11e-09	DOWN	PF03214:Reversibly glycosylated polypeptide	sp|Q8RU27|RGP2_SOLTU Probable UDP-arabinopyranose mutase 2 OS=Solanum tuberosum OX=4113 GN=UPTG2 PE=1 SV=1	--	--	--	--	--	--	egr00520||egr01100||egr01250	Amino sugar and nucleotide sugar metabolism||Metabolic pathways||Biosynthesis of nucleotide sugars
CacGene27262	0	45.3231	7.98735	3.16e-09	UP	-	sp|O81117|C94A1_VICSA Cytochrome P450 94A1 OS=Vicia sativa OX=3908 GN=CYP94A1 PE=2 SV=2	--	--	--	--	--	--	egr00073	Cutin, suberine and wax biosynthesis
CacGene20543	470.1	81.4475	-2.53172	3.24e-09	DOWN	PF02779:Transketolase, pyrimidine binding domain|PF02780:Transketolase, C-terminal domain|PF13292:4-deoxy-D-xylulose-2-phosphate synthase		GO:0006270||GO:1905775||GO:0006260||GO:0008152||GO:0006139||GO:0006259||GO:0006261||GO:0006725||GO:0006807||GO:0008150||GO:0009058||GO:0009059||GO:0009987||GO:0034641||GO:0034645||GO:0043170||GO:0044237||GO:0044238||GO:0044249||GO:0044260||GO:0046483||GO:0071704||GO:0090304||GO:1901360||GO:1901576||GO:0051276||GO:0006996||GO:0010639||GO:0016043||GO:0032392||GO:0032508||GO:0033043||GO:0033044||GO:…	DNA replication initiation||negative regulation of DNA helicase activity||DNA replication||metabolic process||nucleobase-containing compound metabolic process||DNA metabolic process||DNA-dependent DNA replication||cellular aromatic compound metabolic process||nitrogen compound metabolic process||biological_process||biosynthetic process||macromolecule biosynthetic process||cellular process||cellul…	GO:0005634||GO:0042555||GO:0005622||GO:0005575||GO:0005623||GO:0043231||GO:0043226||GO:0043227||GO:0043229||GO:0044424||GO:0044464||GO:0032991	nucleus||MCM complex||intracellular||cellular_component||cell||intracellular membrane-bounded organelle||organelle||membrane-bounded organelle||intracellular organelle||intracellular part||cell part||protein-containing complex	GO:0003677||GO:0005524||GO:0003674||GO:0003676||GO:0005488||GO:0097159||GO:1901363||GO:0000166||GO:0008144||GO:0017076||GO:0030554||GO:0032553||GO:0032555||GO:0032559||GO:0035639||GO:0036094||GO:0043167||GO:0043168||GO:0097367||GO:1901265	DNA binding||ATP binding||molecular_function||nucleic acid binding||binding||organic cyclic compound binding||heterocyclic compound binding||nucleotide binding||drug binding||purine nucleotide binding||adenyl nucleotide binding||ribonucleotide binding||purine ribonucleotide binding||adenyl ribonucleotide binding||purine ribonucleoside triphosphate binding||small molecule binding||ion binding||ani…	egr03030	DNA replication
novel.2096	492.466	35.0644	-3.81196	3.25e-09	DOWN	PF00685:Sulfotransferase domain	sp|Q8L5A7|SOT15_ARATH Cytosolic sulfotransferase 15 OS=Arabidopsis thaliana OX=3702 GN=SOT15 PE=1 SV=1					GO:0008146||GO:0003674||GO:0003824||GO:0016740||GO:0016782	sulfotransferase activity||molecular_function||catalytic activity||transferase activity||transferase activity, transferring sulfur-containing groups	--	--
CacGene12472	106.657	0	-9.16936	3.34e-09	DOWN	PF01471:Putative peptidoglycan binding domain|PF00413:Matrixin	sp|O04529|2MMP_ARATH Metalloendoproteinase 2-MMP OS=Arabidopsis thaliana OX=3702 GN=2MMP PE=1 SV=1	GO:0006508||GO:0008152||GO:0006807||GO:0008150||GO:0019538||GO:0043170||GO:0044238||GO:0071704||GO:1901564	proteolysis||metabolic process||nitrogen compound metabolic process||biological_process||protein metabolic process||macromolecule metabolic process||primary metabolic process||organic substance metabolic process||organonitrogen compound metabolic process	GO:0031012||GO:0005575||GO:0005576||GO:0044421	extracellular matrix||cellular_component||extracellular region||extracellular region part	GO:0004222||GO:0008270||GO:0003674||GO:0003824||GO:0004175||GO:0008237||GO:0008233||GO:0070011||GO:0016787||GO:0140096||GO:0005488||GO:0046872||GO:0043167||GO:0043169||GO:0046914	metalloendopeptidase activity||zinc ion binding||molecular_function||catalytic activity||endopeptidase activity||metallopeptidase activity||peptidase activity||peptidase activity, acting on L-amino acid peptides||hydrolase activity||catalytic activity, acting on a protein||binding||metal ion binding||ion binding||cation binding||transition metal ion binding	--	--
CacGene12057	16.736	114.85	2.77925	3.37e-09	UP	-	-	--	--	--	--	--	--	--	--
CacGene27564	61.227	430.85	2.81407	3.39e-09	UP	PF04525:LURP-one-related	sp|Q9ZVI6|LOR8_ARATH Protein LURP-one-related 8 OS=Arabidopsis thaliana OX=3702 GN=At2g38640 PE=2 SV=1	--	--	--	--	--	--	--	--
CacGene19339	2.66435	62.4988	4.58232	3.49e-09	UP	PF16124:RecQ zinc-binding|PF00270:DEAD/DEAH box helicase|PF00271:Helicase conserved C-terminal domain	sp|Q9FT69|RQSIM_ARATH ATP-dependent DNA helicase Q-like SIM OS=Arabidopsis thaliana OX=3702 GN=RECQSIM PE=2 SV=1					GO:0003676||GO:0005524||GO:0005515||GO:0003674||GO:0005488||GO:0097159||GO:1901363||GO:0000166||GO:0008144||GO:0017076||GO:0030554||GO:0032553||GO:0032555||GO:0032559||GO:0035639||GO:0036094||GO:0043167||GO:0043168||GO:0097367||GO:1901265	nucleic acid binding||ATP binding||protein binding||molecular_function||binding||organic cyclic compound binding||heterocyclic compound binding||nucleotide binding||drug binding||purine nucleotide binding||adenyl nucleotide binding||ribonucleotide binding||purine ribonucleotide binding||adenyl ribonucleotide binding||purine ribonucleoside triphosphate binding||small molecule binding||ion binding|…	--	--
CacGene09163	94.1679	1032.08	3.45594	3.6e-09	UP	PF14541:Xylanase inhibitor C-terminal|PF14543:Xylanase inhibitor N-terminal	sp|Q8S9J6|ASPA_ARATH Aspartyl protease family protein At5g10770 OS=Arabidopsis thaliana OX=3702 GN=At5g10770 PE=2 SV=1	--	--	--	--	--	--	--	--
CacGene24350	262.714	82.3103	-1.67354	3.64e-09	DOWN	PF00069:Protein kinase domain	sp|Q9LYU7|CRN_ARATH Inactive leucine-rich repeat receptor-like protein kinase CORYNE OS=Arabidopsis thaliana OX=3702 GN=CRN PE=1 SV=1	GO:0006468||GO:0008152||GO:0006464||GO:0006793||GO:0006796||GO:0006807||GO:0008150||GO:0009987||GO:0016310||GO:0019538||GO:0036211||GO:0043170||GO:0043412||GO:0044237||GO:0044238||GO:0044260||GO:0044267||GO:0071704||GO:1901564	protein phosphorylation||metabolic process||cellular protein modification process||phosphorus metabolic process||phosphate-containing compound metabolic process||nitrogen compound metabolic process||biological_process||cellular process||phosphorylation||protein metabolic process||protein modification process||macromolecule metabolic process||macromolecule modification||cellular metabolic process|…			GO:0004672||GO:0005524||GO:0003674||GO:0003824||GO:0016301||GO:0016740||GO:0016772||GO:0016773||GO:0140096||GO:0000166||GO:0005488||GO:0008144||GO:0017076||GO:0030554||GO:0032553||GO:0032555||GO:0032559||GO:0035639||GO:0036094||GO:0043167||GO:0043168||GO:0097159||GO:0097367||GO:1901265||GO:1901363	protein kinase activity||ATP binding||molecular_function||catalytic activity||kinase activity||transferase activity||transferase activity, transferring phosphorus-containing groups||phosphotransferase activity, alcohol group as acceptor||catalytic activity, acting on a protein||nucleotide binding||binding||drug binding||purine nucleotide binding||adenyl nucleotide binding||ribonucleotide binding|…	--	--
CacGene03393	0	49.744	8.1226	4.05e-09	UP	PF08276:PAN-like domain	sp|Q9LPZ9|SD113_ARATH G-type lectin S-receptor-like serine/threonine-protein kinase SD1-13 OS=Arabidopsis thaliana OX=3702 GN=SD113 PE=1 SV=2	--	--	--	--	--	--	--	--
novel.813	84.8289	0	-8.83597	4.12e-09	DOWN	-	-	--	--	--	--	--	--	--	--
CacGene15400	98.3133	310.034	1.65929	4.18e-09	UP	PF00249:Myb-like DNA-binding domain	sp|B3VTV7|MYB60_VITVI Transcription factor MYB60 OS=Vitis vinifera OX=29760 GN=MYB60 PE=2 SV=1					GO:0003677||GO:0003674||GO:0003676||GO:0005488||GO:0097159||GO:1901363	DNA binding||molecular_function||nucleic acid binding||binding||organic cyclic compound binding||heterocyclic compound binding	--	--
CacGene05533	30.3725	182.81	2.5882	4.21e-09	UP	PF01221:Dynein light chain type 1	sp|Q86A88|DYL_DICDI Dynein light chain, cytoplasmic OS=Dictyostelium discoideum OX=44689 GN=dlcB PE=3 SV=1	GO:0007017||GO:0008150||GO:0009987	microtubule-based process||biological_process||cellular process	GO:0030286||GO:0005622||GO:0005575||GO:0005623||GO:0005856||GO:0005875||GO:0015630||GO:0032991||GO:0043226||GO:0043228||GO:0043229||GO:0043232||GO:0044422||GO:0044424||GO:0044430||GO:0044446||GO:0044464||GO:1902494	dynein complex||intracellular||cellular_component||cell||cytoskeleton||microtubule associated complex||microtubule cytoskeleton||protein-containing complex||organelle||non-membrane-bounded organelle||intracellular organelle||intracellular non-membrane-bounded organelle||organelle part||intracellular part||cytoskeletal part||intracellular organelle part||cell part||catalytic complex			--	--
CacGene00914	30.0467	542.682	4.16604	4.36e-09	UP	-	sp|F8WKW1|UGT2_GARJA 7-deoxyloganetin glucosyltransferase OS=Gardenia jasminoides OX=114476 GN=UGT85A24 PE=1 SV=1	--	--	--	--	--	--	--	--
CacGene05406	26.65	204.436	2.94956	4.37e-09	UP	PF00464:Serine hydroxymethyltransferase	sp|Q9FFN2|GLYT3_ARATH Probable glycosyltransferase At5g03795 OS=Arabidopsis thaliana OX=3702 GN=At5g03795 PE=3 SV=2	--	--	--	--	--	--	--	--
CacGene19953	963.468	2926.43	1.60331	4.4e-09	UP	PF00067:Cytochrome P450	sp|Q42569|C90A1_ARATH Cytochrome P450 90A1 OS=Arabidopsis thaliana OX=3702 GN=CYP90A1 PE=1 SV=1	GO:0055114||GO:0008152||GO:0008150	oxidation-reduction process||metabolic process||biological_process			GO:0005506||GO:0016705||GO:0020037||GO:0003674||GO:0005488||GO:0046872||GO:0043167||GO:0043169||GO:0046914||GO:0003824||GO:0016491||GO:0046906||GO:0048037||GO:0097159||GO:1901363	iron ion binding||oxidoreductase activity, acting on paired donors, with incorporation or reduction of molecular oxygen||heme binding||molecular_function||binding||metal ion binding||ion binding||cation binding||transition metal ion binding||catalytic activity||oxidoreductase activity||tetrapyrrole binding||cofactor binding||organic cyclic compound binding||heterocyclic compound binding	egr00905||egr01100||egr01110	Brassinosteroid biosynthesis||Metabolic pathways||Biosynthesis of secondary metabolites
CacGene26935	92.4623	2.37151	-5.28937	4.55e-09	DOWN	PF00657:GDSL-like Lipase/Acylhydrolase	sp|Q9FXJ1|GDL6_ARATH GDSL esterase/lipase At1g28570 OS=Arabidopsis thaliana OX=3702 GN=At1g28570 PE=3 SV=1					GO:0016788||GO:0003674||GO:0003824||GO:0016787	hydrolase activity, acting on ester bonds||molecular_function||catalytic activity||hydrolase activity	--	--
novel.11	64.8055	0	-8.44662	4.76e-09	DOWN	-	sp|F4I6E6|PRIH_ARATH Primase homolog protein OS=Arabidopsis thaliana OX=3702 GN=At1g30660 PE=3 SV=1	--	--	--	--	--	--	--	--
CacGene02996	1941.18	369.738	-2.39308	5.09e-09	DOWN	PF00650:CRAL/TRIO domain	sp|Q94C59|PATL4_ARATH Patellin-4 OS=Arabidopsis thaliana OX=3702 GN=PATL4 PE=1 SV=2	--	--	--	--	--	--	--	--
CacGene10388	688.965	3377.5	2.29276	5.58e-09	UP	-	sp|Q9FS10|PSK_ASPOF Phytosulfokines OS=Asparagus officinalis OX=4686 GN=PSK PE=1 SV=1	--	--	--	--	--	--	--	--
CacGene01401	3.02439	123.011	5.37484	5.76e-09	UP	PF03169:OPT oligopeptide transporter protein	sp|Q9FME8|OPT4_ARATH Oligopeptide transporter 4 OS=Arabidopsis thaliana OX=3702 GN=OPT4 PE=1 SV=1	GO:0055085||GO:0006810||GO:0008150||GO:0051179||GO:0051234	transmembrane transport||transport||biological_process||localization||establishment of localization					--	--
CacGene02221	1409.49	3577.7	1.34406	6.12e-09	UP	PF00067:Cytochrome P450	sp|Q9M066|C90C1_ARATH 3-epi-6-deoxocathasterone 23-monooxygenase CYP90C1 OS=Arabidopsis thaliana OX=3702 GN=CYP90C1 PE=1 SV=3	GO:0055114||GO:0008152||GO:0008150	oxidation-reduction process||metabolic process||biological_process			GO:0005506||GO:0016705||GO:0020037||GO:0003674||GO:0005488||GO:0046872||GO:0043167||GO:0043169||GO:0046914||GO:0003824||GO:0016491||GO:0046906||GO:0048037||GO:0097159||GO:1901363	iron ion binding||oxidoreductase activity, acting on paired donors, with incorporation or reduction of molecular oxygen||heme binding||molecular_function||binding||metal ion binding||ion binding||cation binding||transition metal ion binding||catalytic activity||oxidoreductase activity||tetrapyrrole binding||cofactor binding||organic cyclic compound binding||heterocyclic compound binding	egr00905||egr01100||egr01110	Brassinosteroid biosynthesis||Metabolic pathways||Biosynthesis of secondary metabolites
CacGene21966	201.83	6.91017	-4.86051	6.13e-09	DOWN	PF03168:Late embryogenesis abundant protein	-	--	--	--	--	--	--	--	--
CacGene27315	217.943	5.10857	-5.42003	6.15e-09	DOWN	PF07992:Pyridine nucleotide-disulphide oxidoreductase|PF02852:Pyridine nucleotide-disulphide oxidoreductase, dimerisation domain	sp|F4JLP5|PLPD2_ARATH Dihydrolipoyl dehydrogenase 2, chloroplastic OS=Arabidopsis thaliana OX=3702 GN=LPD2 PE=2 SV=2	GO:0055114||GO:0045454||GO:0008152||GO:0008150||GO:0009987||GO:0019725||GO:0042592||GO:0050789||GO:0050794||GO:0065007||GO:0065008	oxidation-reduction process||cell redox homeostasis||metabolic process||biological_process||cellular process||cellular homeostasis||homeostatic process||regulation of biological process||regulation of cellular process||biological regulation||regulation of biological quality			GO:0016491||GO:0050660||GO:0003674||GO:0003824||GO:0000166||GO:0005488||GO:0036094||GO:0043167||GO:0043168||GO:0048037||GO:0050662||GO:0097159||GO:1901265||GO:1901363	oxidoreductase activity||flavin adenine dinucleotide binding||molecular_function||catalytic activity||nucleotide binding||binding||small molecule binding||ion binding||anion binding||cofactor binding||coenzyme binding||organic cyclic compound binding||nucleoside phosphate binding||heterocyclic compound binding	egr00010||egr00020||egr00260||egr00280||egr00310||egr00380||egr00620||egr00630||egr00640||egr01100||egr01110||egr01200||egr01240	Glycolysis / Gluconeogenesis||Citrate cycle (TCA cycle)||Glycine, serine and threonine metabolism||Valine, leucine and isoleucine degradation||Lysine degradation||Tryptophan metabolism||Pyruvate metabolism||Glyoxylate and dicarboxylate metabolism||Propanoate metabolism||Metabolic pathways||Biosynthesis of secondary metabolites||Carbon metabolism||Biosynthesis of cofactors
CacGene20647	248.711	856.789	1.7847	6.36e-09	UP	PF07859:alpha/beta hydrolase fold	sp|Q93ZL5|CDF2_ARATH Cyclic dof factor 2 OS=Arabidopsis thaliana OX=3702 GN=CDF2 PE=1 SV=2	GO:0006355||GO:0008152||GO:0006139||GO:0006351||GO:0006725||GO:0006807||GO:0008150||GO:0009058||GO:0009059||GO:0009889||GO:0009987||GO:0010467||GO:0010468||GO:0010556||GO:0016070||GO:0018130||GO:0019219||GO:0019222||GO:0019438||GO:0031323||GO:0031326||GO:0032774||GO:0034641||GO:0034645||GO:0034654||GO:0043170||GO:0044237||GO:0044238||GO:0044249||GO:0044260||GO:0044271||GO:0046483||GO:0050789||GO:…	regulation of transcription, DNA-templated||metabolic process||nucleobase-containing compound metabolic process||transcription, DNA-templated||cellular aromatic compound metabolic process||nitrogen compound metabolic process||biological_process||biosynthetic process||macromolecule biosynthetic process||regulation of biosynthetic process||cellular process||gene expression||regulation of gene expre…			GO:0003677||GO:0003674||GO:0003676||GO:0005488||GO:0097159||GO:1901363	DNA binding||molecular_function||nucleic acid binding||binding||organic cyclic compound binding||heterocyclic compound binding	--	--
CacGene13553	246.725	1263.9	2.35853	6.61e-09	UP	PF13837:Myb/SANT-like DNA-binding domain	sp|Q8VZ20|ASR3_ARATH Trihelix transcription factor ASR3 OS=Arabidopsis thaliana OX=3702 GN=ASR3 PE=1 SV=1	--	--	--	--	--	--	--	--
CacGene13883	744.052	276.041	-1.43019	6.67e-09	DOWN	PF00348:Polyprenyl synthetase	sp|Q39108|GGR_ARATH Heterodimeric geranylgeranyl pyrophosphate synthase small subunit, chloroplastic OS=Arabidopsis thaliana OX=3702 GN=GGR PE=1 SV=2	GO:0008299||GO:0008152||GO:0006629||GO:0006720||GO:0008150||GO:0008610||GO:0009058||GO:0009987||GO:0044237||GO:0044238||GO:0044249||GO:0044255||GO:0071704||GO:1901576	isoprenoid biosynthetic process||metabolic process||lipid metabolic process||isoprenoid metabolic process||biological_process||lipid biosynthetic process||biosynthetic process||cellular process||cellular metabolic process||primary metabolic process||cellular biosynthetic process||cellular lipid metabolic process||organic substance metabolic process||organic substance biosynthetic process					egr00900||egr01100||egr01110	Terpenoid backbone biosynthesis||Metabolic pathways||Biosynthesis of secondary metabolites
novel.12	86.3572	1.72799	-5.66601	6.7e-09	DOWN	-	sp|B5X582|TWIH_ARATH Twinkle homolog protein, chloroplastic/mitochondrial OS=Arabidopsis thaliana OX=3702 GN=At1g30680 PE=1 SV=1	--	--	--	--	--	--	--	--
CacGene13751	1370.83	377.409	-1.86153	6.76e-09	DOWN	PF00722:Glycosyl hydrolases family 16	sp|Q8LDW9|XTH9_ARATH Xyloglucan endotransglucosylase/hydrolase protein 9 OS=Arabidopsis thaliana OX=3702 GN=XTH9 PE=2 SV=2	GO:0005975||GO:0008152||GO:0008150||GO:0044238||GO:0071704	carbohydrate metabolic process||metabolic process||biological_process||primary metabolic process||organic substance metabolic process			GO:0004553||GO:0003674||GO:0003824||GO:0016787||GO:0016798	hydrolase activity, hydrolyzing O-glycosyl compounds||molecular_function||catalytic activity||hydrolase activity||hydrolase activity, acting on glycosyl bonds	--	--
CacGene08671	26.2928	163.842	2.6294	6.92e-09	UP	PF03140:Plant protein of unknown function|PF06943:LSD1 zinc finger	sp|P94077|LSD1_ARATH Protein LSD1 OS=Arabidopsis thaliana OX=3702 GN=LSD1 PE=1 SV=1	--	--	--	--	--	--	--	--
CacGene17780	7.31979	84.9272	3.52785	7.52e-09	UP	PF02458:Transferase family	sp|Q70PR7|VINSY_RAUSE Vinorine synthase OS=Rauvolfia serpentina OX=4060 GN=ACT PE=1 SV=2					GO:0016747||GO:0003674||GO:0003824||GO:0016740||GO:0016746	transferase activity, transferring acyl groups other than amino-acyl groups||molecular_function||catalytic activity||transferase activity||transferase activity, transferring acyl groups	--	--
CacGene15135	87.505	882.819	3.33145	7.54e-09	UP	-	sp|Q9LVL5|WNK4_ARATH Probable serine/threonine-protein kinase WNK4 OS=Arabidopsis thaliana OX=3702 GN=WNK4 PE=1 SV=1	--	--	--	--	--	--	--	--
CacGene22101	1021.36	383.006	-1.4154	7.72e-09	DOWN	PF03345:Oligosaccharyltransferase 48 kDa subunit beta	sp|Q944K2|OST48_ARATH Dolichyl-diphosphooligosaccharide--protein glycosyltransferase 48 kDa subunit OS=Arabidopsis thaliana OX=3702 GN=OST48 PE=2 SV=1	GO:0018279||GO:0008152||GO:0006464||GO:0006486||GO:0006487||GO:0006807||GO:0008150||GO:0009058||GO:0009059||GO:0009100||GO:0009101||GO:0009987||GO:0018193||GO:0018196||GO:0019538||GO:0034645||GO:0036211||GO:0043170||GO:0043412||GO:0043413||GO:0044237||GO:0044238||GO:0044249||GO:0044260||GO:0044267||GO:0070085||GO:0071704||GO:1901135||GO:1901137||GO:1901564||GO:1901566||GO:1901576	protein N-linked glycosylation via asparagine||metabolic process||cellular protein modification process||protein glycosylation||protein N-linked glycosylation||nitrogen compound metabolic process||biological_process||biosynthetic process||macromolecule biosynthetic process||glycoprotein metabolic process||glycoprotein biosynthetic process||cellular process||peptidyl-amino acid modification||pepti…	GO:0005789||GO:0005622||GO:0005575||GO:0016020||GO:0005623||GO:0005737||GO:0005783||GO:0043231||GO:0012505||GO:0031984||GO:0042175||GO:0043226||GO:0043227||GO:0043229||GO:0044422||GO:0044424||GO:0044425||GO:0044432||GO:0044444||GO:0044446||GO:0044464||GO:0098827	endoplasmic reticulum membrane||intracellular||cellular_component||membrane||cell||cytoplasm||endoplasmic reticulum||intracellular membrane-bounded organelle||endomembrane system||organelle subcompartment||nuclear outer membrane-endoplasmic reticulum membrane network||organelle||membrane-bounded organelle||intracellular organelle||organelle part||intracellular part||membrane part||endoplasmic ret…			egr00510||egr00513||egr01100||egr04141	N-Glycan biosynthesis||Various types of N-glycan biosynthesis||Metabolic pathways||Protein processing in endoplasmic reticulum
CacGene00449	67.3839	282.031	2.06532	7.78e-09	UP	PF00117:Glutamine amidotransferase class-I	sp|O04161|AMT12_SOLLC Ammonium transporter 1 member 2 OS=Solanum lycopersicum OX=4081 GN=AMT1-2 PE=2 SV=1	GO:0015696||GO:0006810||GO:0006811||GO:0006812||GO:0008150||GO:0051179||GO:0051234||GO:0071705	ammonium transport||transport||ion transport||cation transport||biological_process||localization||establishment of localization||nitrogen compound transport	GO:0016020||GO:0005575	membrane||cellular_component	GO:0008519||GO:0003674||GO:0005215||GO:0022857||GO:0008324||GO:0015075	ammonium transmembrane transporter activity||molecular_function||transporter activity||transmembrane transporter activity||cation transmembrane transporter activity||ion transmembrane transporter activity	--	--
CacGene12420	191.773	19.1535	-3.32273	8.14e-09	DOWN	PF00657:GDSL-like Lipase/Acylhydrolase	sp|Q9LY84|GDL76_ARATH GDSL esterase/lipase At5g14450 OS=Arabidopsis thaliana OX=3702 GN=At5g14450 PE=2 SV=1					GO:0016788||GO:0003674||GO:0003824||GO:0016787	hydrolase activity, acting on ester bonds||molecular_function||catalytic activity||hydrolase activity	--	--
CacGene24977	2546.24	15172.1	2.57484	8.21e-09	UP	-	sp|Q40281|RCA_MALDO Ribulose bisphosphate carboxylase/oxygenase activase, chloroplastic OS=Malus domestica OX=3750 GN=RCA PE=2 SV=1	--	--	--	--	--	--	--	--
CacGene18966	19.7411	149.254	2.91426	9.05e-09	UP	PF00282:Pyridoxal-dependent decarboxylase conserved domain	sp|Q07346|DCE_PETHY Glutamate decarboxylase OS=Petunia hybrida OX=4102 GN=GAD PE=1 SV=1	GO:0019752||GO:0008152||GO:0006082||GO:0008150||GO:0009987||GO:0043436||GO:0044237||GO:0044281||GO:0071704	carboxylic acid metabolic process||metabolic process||organic acid metabolic process||biological_process||cellular process||oxoacid metabolic process||cellular metabolic process||small molecule metabolic process||organic substance metabolic process			GO:0016831||GO:0030170||GO:0003674||GO:0003824||GO:0016829||GO:0016830||GO:0005488||GO:0008144||GO:0019842||GO:0036094||GO:0043167||GO:0043168||GO:0048037||GO:0050662||GO:0070279||GO:0097159||GO:1901363	carboxy-lyase activity||pyridoxal phosphate binding||molecular_function||catalytic activity||lyase activity||carbon-carbon lyase activity||binding||drug binding||vitamin binding||small molecule binding||ion binding||anion binding||cofactor binding||coenzyme binding||vitamin B6 binding||organic cyclic compound binding||heterocyclic compound binding	egr00250||egr00410||egr00430||egr00650||egr01100||egr01110	Alanine, aspartate and glutamate metabolism||beta-Alanine metabolism||Taurine and hypotaurine metabolism||Butanoate metabolism||Metabolic pathways||Biosynthesis of secondary metabolites
CacGene03970	219.816	4.226	-5.72001	9.22e-09	DOWN	PF02779:Transketolase, pyrimidine binding domain|PF02780:Transketolase, C-terminal domain|PF13292:5-deoxy-U-xylulose-4-phosphate synthase	-	--	--	--	--	--	--	--	--
CacGene25447	1967.83	353.787	-2.47635	9.29e-09	DOWN	-	-	--	--	--	--	--	--	--	--
CacGene00388	531.038	1946.69	1.87447	9.32e-09	UP	PF01014:Uricase	sp|P34798|URIC1_CANLI Uricase-2 isozyme 1 OS=Canavalia lineata OX=28957 PE=2 SV=1	--	--	--	--	--	--	egr00230||egr00232||egr01100	Purine metabolism||Caffeine metabolism||Metabolic pathways
CacGene03486	2678.99	623.858	-2.10257	9.38e-09	DOWN	-	sp|P92980|APR3_ARATH 5'-adenylylsulfate reductase 3, chloroplastic OS=Arabidopsis thaliana OX=3702 GN=APR3 PE=2 SV=2	--	--	--	--	--	--	egr00920||egr01100	Sulfur metabolism||Metabolic pathways
CacGene09858	415.711	1365.34	1.71705	9.75e-09	UP	PF00067:Cytochrome P450	sp|Q69F95|C85A_PHAVU Cytochrome P450 85A OS=Phaseolus vulgaris OX=3885 GN=BA13 PE=3 SV=2	GO:0055114||GO:0008152||GO:0008150	oxidation-reduction process||metabolic process||biological_process			GO:0005506||GO:0016705||GO:0020037||GO:0003674||GO:0005488||GO:0046872||GO:0043167||GO:0043169||GO:0046914||GO:0003824||GO:0016491||GO:0046906||GO:0048037||GO:0097159||GO:1901363	iron ion binding||oxidoreductase activity, acting on paired donors, with incorporation or reduction of molecular oxygen||heme binding||molecular_function||binding||metal ion binding||ion binding||cation binding||transition metal ion binding||catalytic activity||oxidoreductase activity||tetrapyrrole binding||cofactor binding||organic cyclic compound binding||heterocyclic compound binding	egr00905||egr01100||egr01110	Brassinosteroid biosynthesis||Metabolic pathways||Biosynthesis of secondary metabolites
novel.931	101.372	1.30325	-6.25616	9.79e-09	DOWN	-	-	--	--	--	--	--	--	--	--
CacGene19406	118.915	1118	3.23533	9.98e-09	UP	PF02779:Transketolase, pyrimidine binding domain|PF02780:Transketolase, C-terminal domain|PF13292:1-deoxy-U-xylulose-3-phosphate synthase	sp|A0A2R6Q326|AT16_ACTCC Alcohol acyltransferase 16 OS=Actinidia chinensis var. chinensis OX=1590841 GN=AT16 PE=1 SV=2					GO:0016747||GO:0003674||GO:0003824||GO:0016740||GO:0016746	transferase activity, transferring acyl groups other than amino-acyl groups||molecular_function||catalytic activity||transferase activity||transferase activity, transferring acyl groups	--	--
CacGene07195	787.727	72.7164	-3.43944	1.05e-08	DOWN	PF02458:Transferase family	sp|Q8GSN8|3MAT_DAHPI Malonyl-coenzyme A:anthocyanin 3-O-glucoside-6''-O-malonyltransferase OS=Dahlia pinnata OX=101596 GN=3MAT PE=1 SV=1					GO:0016747||GO:0003674||GO:0003824||GO:0016740||GO:0016746	transferase activity, transferring acyl groups other than amino-acyl groups||molecular_function||catalytic activity||transferase activity||transferase activity, transferring acyl groups	--	--
CacGene27119	92.5791	0.323786	-7.9993	1.19e-08	DOWN	PF00368:Hydroxymethylglutaryl-coenzyme A reductase	sp|B0G107|SAMH1_DICDI Deoxynucleoside triphosphate triphosphohydrolase SAMHD1 homolog OS=Dictyostelium discoideum OX=44689 GN=DDB_G0272484 PE=3 SV=1	--	--	--	--	--	--	egr03250	Viral life cycle - HIV-1
CacGene10433	4450.83	13127.3	1.56041	1.28e-08	UP	PF00464:Serine hydroxymethyltransferase	sp|P50433|GLYM_SOLTU Serine hydroxymethyltransferase, mitochondrial OS=Solanum tuberosum OX=4113 PE=2 SV=1	--	--	--	--	--	--	egr00260||egr00460||egr00630||egr00670||egr01100||egr01110||egr01200||egr01230||egr01240	Glycine, serine and threonine metabolism||Cyanoamino acid metabolism||Glyoxylate and dicarboxylate metabolism||One carbon pool by folate||Metabolic pathways||Biosynthesis of secondary metabolites||Carbon metabolism||Biosynthesis of amino acids||Biosynthesis of cofactors
CacGene19402	442.708	130.729	-1.75973	1.33e-08	DOWN	-	sp|F4JIF5|TCX2_ARATH Protein tesmin/TSO1-like CXC 2 OS=Arabidopsis thaliana OX=3702 GN=TCX2 PE=1 SV=1	--	--	--	--	--	--	--	--
CacGene21972	33.3496	494.527	3.88296	1.36e-08	UP	PF17862:AAA+ lid domain|PF00004:ATPase family associated with various cellular activities (AAA)	sp|Q6NW58|SPAST_DANRE Spastin OS=Danio rerio OX=7955 GN=spast PE=2 SV=2					GO:0005524||GO:0000166||GO:0003674||GO:0005488||GO:0008144||GO:0017076||GO:0030554||GO:0032553||GO:0032555||GO:0032559||GO:0035639||GO:0036094||GO:0043167||GO:0043168||GO:0097159||GO:0097367||GO:1901265||GO:1901363	ATP binding||nucleotide binding||molecular_function||binding||drug binding||purine nucleotide binding||adenyl nucleotide binding||ribonucleotide binding||purine ribonucleotide binding||adenyl ribonucleotide binding||purine ribonucleoside triphosphate binding||small molecule binding||ion binding||anion binding||organic cyclic compound binding||carbohydrate derivative binding||nucleoside phosphate …	--	--
CacGene02202	456.759	1227.09	1.42579	1.46e-08	UP	-	-	--	--	--	--	--	--	--	--
CacGene15777	0.289483	60.6679	7.44693	1.56e-08	UP	PF13499:EF-hand domain pair	sp|Q9FI19|CML43_ARATH Probable calcium-binding protein CML43 OS=Arabidopsis thaliana OX=3702 GN=CML43 PE=2 SV=1					GO:0005509||GO:0003674||GO:0005488||GO:0046872||GO:0043167||GO:0043169	calcium ion binding||molecular_function||binding||metal ion binding||ion binding||cation binding	--	--
CacGene24243	141.468	16.5292	-3.09817	1.58e-08	DOWN	-	sp|O64865|LTG14_ARATH Non-specific lipid transfer protein GPI-anchored 14 OS=Arabidopsis thaliana OX=3702 GN=LTPG14 PE=2 SV=1	--	--	--	--	--	--	--	--
CacGene02233	11.3643	251.029	4.44558	1.65e-08	UP	PF00067:Cytochrome P450	sp|Q42600|C84A1_ARATH Cytochrome P450 84A1 OS=Arabidopsis thaliana OX=3702 GN=CYP84A1 PE=1 SV=1	GO:0055114||GO:0008152||GO:0008150	oxidation-reduction process||metabolic process||biological_process			GO:0005506||GO:0016705||GO:0020037||GO:0003674||GO:0005488||GO:0046872||GO:0043167||GO:0043169||GO:0046914||GO:0003824||GO:0016491||GO:0046906||GO:0048037||GO:0097159||GO:1901363	iron ion binding||oxidoreductase activity, acting on paired donors, with incorporation or reduction of molecular oxygen||heme binding||molecular_function||binding||metal ion binding||ion binding||cation binding||transition metal ion binding||catalytic activity||oxidoreductase activity||tetrapyrrole binding||cofactor binding||organic cyclic compound binding||heterocyclic compound binding	egr00940||egr01100||egr01110	Phenylpropanoid biosynthesis||Metabolic pathways||Biosynthesis of secondary metabolites
novel.415	0.578965	63.4103	6.64208	1.75e-08	UP	PF13855:Leucine rich repeat	sp|F4J8G2|RLP33_ARATH Receptor-like protein 33 OS=Arabidopsis thaliana OX=3702 GN=RLP33 PE=3 SV=1					GO:0005515||GO:0003674||GO:0005488	protein binding||molecular_function||binding	--	--
CacGene09506	1108.47	5243.9	2.24192	1.78e-08	UP	PF01852:START domain	-					GO:0008289||GO:0003674||GO:0005488	lipid binding||molecular_function||binding	--	--
CacGene10455	172.873	849.237	2.29591	1.82e-08	UP	PF07859:alpha/beta hydrolase fold	sp|Q9LFR7|CXE17_ARATH Probable carboxylesterase 17 OS=Arabidopsis thaliana OX=3702 GN=CXE17 PE=1 SV=1					GO:0016787||GO:0003674||GO:0003824	hydrolase activity||molecular_function||catalytic activity	--	--
CacGene15933	5.95619	73.4011	3.63975	1.83e-08	UP	PF00561:alpha/beta hydrolase fold	sp|Q9SG92|MES17_ARATH Methylesterase 17 OS=Arabidopsis thaliana OX=3702 GN=MES17 PE=1 SV=1	--	--	--	--	--	--	--	--
CacGene02401	858.602	3198.42	1.897	1.93e-08	UP	-	-	--	--	--	--	--	--	--	--
CacGene03488	185.473	505.718	1.44606	1.94e-08	UP	PF07983:X8 domain|PF00332:Glycosyl hydrolases family 17	sp|O65399|E131_ARATH Glucan endo-1,3-beta-glucosidase 1 OS=Arabidopsis thaliana OX=3702 GN=At1g11820 PE=2 SV=3	GO:0005975||GO:0008152||GO:0008150||GO:0044238||GO:0071704	carbohydrate metabolic process||metabolic process||biological_process||primary metabolic process||organic substance metabolic process			GO:0004553||GO:0003674||GO:0003824||GO:0016787||GO:0016798	hydrolase activity, hydrolyzing O-glycosyl compounds||molecular_function||catalytic activity||hydrolase activity||hydrolase activity, acting on glycosyl bonds	egr00500||egr01100	Starch and sucrose metabolism||Metabolic pathways
CacGene02014	78.6147	3.40612	-4.54023	1.96e-08	DOWN	PF01486:K-box region	sp|Q8LLR1|MADS3_VITVI Agamous-like MADS-box protein MADS3 OS=Vitis vinifera OX=29760 GN=MADS3 PE=2 SV=1	GO:0006355||GO:0008152||GO:0006139||GO:0006351||GO:0006725||GO:0006807||GO:0008150||GO:0009058||GO:0009059||GO:0009889||GO:0009987||GO:0010467||GO:0010468||GO:0010556||GO:0016070||GO:0018130||GO:0019219||GO:0019222||GO:0019438||GO:0031323||GO:0031326||GO:0032774||GO:0034641||GO:0034645||GO:0034654||GO:0043170||GO:0044237||GO:0044238||GO:0044249||GO:0044260||GO:0044271||GO:0046483||GO:0050789||GO:…	regulation of transcription, DNA-templated||metabolic process||nucleobase-containing compound metabolic process||transcription, DNA-templated||cellular aromatic compound metabolic process||nitrogen compound metabolic process||biological_process||biosynthetic process||macromolecule biosynthetic process||regulation of biosynthetic process||cellular process||gene expression||regulation of gene expre…	GO:0005634||GO:0005622||GO:0005575||GO:0005623||GO:0043231||GO:0043226||GO:0043227||GO:0043229||GO:0044424||GO:0044464	nucleus||intracellular||cellular_component||cell||intracellular membrane-bounded organelle||organelle||membrane-bounded organelle||intracellular organelle||intracellular part||cell part	GO:0003700||GO:0003674||GO:0140110	DNA binding transcription factor activity||molecular_function||transcription regulator activity	--	--
CacGene05785	399.702	74.9684	-2.41728	2.01e-08	DOWN	PF10497:Zinc-finger domain of monoamine-oxidase A repressor R1	-	--	--	--	--	--	--	--	--
CacGene03438	29.9325	256.532	3.10012	2.31e-08	UP	-	-	--	--	--	--	--	--	--	--
CacGene11292	1462.84	445.227	-1.71628	2.4e-08	DOWN	PF00933:Glycosyl hydrolase family 3 N terminal domain|PF01915:Glycosyl hydrolase family 3 C-terminal domain	sp|Q23892|GLUA_DICDI Lysosomal beta glucosidase OS=Dictyostelium discoideum OX=44689 GN=gluA PE=1 SV=2	GO:0005975||GO:0008152||GO:0008150||GO:0044238||GO:0071704	carbohydrate metabolic process||metabolic process||biological_process||primary metabolic process||organic substance metabolic process			GO:0004553||GO:0003674||GO:0003824||GO:0016787||GO:0016798	hydrolase activity, hydrolyzing O-glycosyl compounds||molecular_function||catalytic activity||hydrolase activity||hydrolase activity, acting on glycosyl bonds	egr00460||egr00500||egr00999||egr01100||egr01110	Cyanoamino acid metabolism||Starch and sucrose metabolism||Biosynthesis of various plant secondary metabolites||Metabolic pathways||Biosynthesis of secondary metabolites
CacGene11833	330.252	1371.37	2.05445	2.4e-08	UP	PF02458:Transferase family	-					GO:0016747||GO:0003674||GO:0003824||GO:0016740||GO:0016746	transferase activity, transferring acyl groups other than amino-acyl groups||molecular_function||catalytic activity||transferase activity||transferase activity, transferring acyl groups	--	--
novel.1629	78.8916	650.189	3.03893	2.47e-08	UP	-	-	--	--	--	--	--	--	--	--
CacGene01876	586.078	1599.34	1.44808	2.53e-08	UP	PF00010:Helix-loop-helix DNA-binding domain	sp|Q8W2F3|PIF4_ARATH Transcription factor PIF4 OS=Arabidopsis thaliana OX=3702 GN=PIF4 PE=1 SV=1					GO:0046983||GO:0005515||GO:0003674||GO:0005488	protein dimerization activity||protein binding||molecular_function||binding	egr04075	Plant hormone signal transduction
CacGene14835	257.032	1098	2.09319	2.59e-08	UP	PF00403:Heavy-metal-associated domain	sp|O03982|HIP39_ARATH Heavy metal-associated isoprenylated plant protein 39 OS=Arabidopsis thaliana OX=3702 GN=HIPP39 PE=2 SV=1	GO:0030001||GO:0006810||GO:0006811||GO:0006812||GO:0008150||GO:0051179||GO:0051234	metal ion transport||transport||ion transport||cation transport||biological_process||localization||establishment of localization			GO:0046872||GO:0003674||GO:0005488||GO:0043167||GO:0043169	metal ion binding||molecular_function||binding||ion binding||cation binding	--	--
CacGene02261	213.662	42.5343	-2.3311	2.63e-08	DOWN	-	-	--	--	--	--	--	--	--	--
CacGene12218	73.6615	10.4063	-2.8223	2.71e-08	DOWN	PF00117:Glutamine amidotransferase class-I	sp|O82225|GGP5_ARATH Gamma-glutamyl peptidase 5 OS=Arabidopsis thaliana OX=3702 GN=GGP5 PE=2 SV=1	--	--	--	--	--	--	--	--
CacGene17096	952.047	3242.39	1.76793	3.39e-08	UP	-	sp|Q9S713|STT7_ARATH Serine/threonine-protein kinase STN7, chloroplastic OS=Arabidopsis thaliana OX=3702 GN=STN7 PE=1 SV=1	--	--	--	--	--	--	--	--
CacGene16710	21.7371	232.402	3.42379	3.43e-08	UP	PF00403:Heavy-metal-associated domain	sp|F4IC29|HIP28_ARATH Heavy metal-associated isoprenylated plant protein 28 OS=Arabidopsis thaliana OX=3702 GN=HIPP28 PE=3 SV=1	GO:0030001||GO:0006810||GO:0006811||GO:0006812||GO:0008150||GO:0051179||GO:0051234	metal ion transport||transport||ion transport||cation transport||biological_process||localization||establishment of localization			GO:0046872||GO:0003674||GO:0005488||GO:0043167||GO:0043169	metal ion binding||molecular_function||binding||ion binding||cation binding	--	--
CacGene04270	1.83395	67.748	5.16187	3.46e-08	UP	PF01397:Terpene synthase, N-terminal domain|PF03936:Terpene synthase family, metal binding domain	sp|Q9FMG1|MCA3_ARATH Metacaspase-3 OS=Arabidopsis thaliana OX=3702 GN=AMC3 PE=2 SV=1	--	--	--	--	--	--	--	--
novel.1783	45.1979	231.865	2.36311	3.5e-08	UP	-	-	--	--	--	--	--	--	--	--
CacGene07960	54.2133	441.262	3.01982	3.6e-08	UP	PF02779:Transketolase, pyrimidine binding domain|PF02780:Transketolase, C-terminal domain|PF13292:5-deoxy-U-xylulose-3-phosphate synthase	sp|Q8LGN0|GLR27_ARATH Glutamate receptor 2.7 OS=Arabidopsis thaliana OX=3702 GN=GLR2.7 PE=2 SV=3			GO:0016020||GO:0005575	membrane||cellular_component	GO:0004970||GO:0003674||GO:0004871||GO:0004888||GO:0038023||GO:0005215||GO:0005216||GO:0005230||GO:0022857||GO:0008066||GO:0015075||GO:0015267||GO:0015276||GO:0015318||GO:0022803||GO:0022824||GO:0022834||GO:0022835||GO:0022836||GO:0022838||GO:0022839||GO:0030594||GO:0060089	ionotropic glutamate receptor activity||molecular_function||signal transducer activity||transmembrane signaling receptor activity||signaling receptor activity||transporter activity||ion channel activity||extracellular ligand-gated ion channel activity||transmembrane transporter activity||glutamate receptor activity||ion transmembrane transporter activity||channel activity||ligand-gated ion channe…	--	--
CacGene10700	436.067	1547.57	1.82784	3.86e-08	UP	PF00005:ABC transporter|PF01061:ABC-2 type transporter	sp|Q9SZR9|AB9G_ARATH ABC transporter G family member 9 OS=Arabidopsis thaliana OX=3702 GN=ABCG9 PE=1 SV=2			GO:0016020||GO:0005575	membrane||cellular_component	GO:0005524||GO:0016887||GO:0000166||GO:0003674||GO:0005488||GO:0008144||GO:0017076||GO:0030554||GO:0032553||GO:0032555||GO:0032559||GO:0035639||GO:0036094||GO:0043167||GO:0043168||GO:0097159||GO:0097367||GO:1901265||GO:1901363||GO:0003824||GO:0017111||GO:0016462||GO:0016787||GO:0016817||GO:0016818	ATP binding||ATPase activity||nucleotide binding||molecular_function||binding||drug binding||purine nucleotide binding||adenyl nucleotide binding||ribonucleotide binding||purine ribonucleotide binding||adenyl ribonucleotide binding||purine ribonucleoside triphosphate binding||small molecule binding||ion binding||anion binding||organic cyclic compound binding||carbohydrate derivative binding||nucl…	egr02010	ABC transporters
CacGene22253	200.746	652.181	1.69879	3.92e-08	UP	PF03151:Triose-phosphate Transporter family	sp|Q9LRP2|PT317_ARATH Probable sugar phosphate/phosphate translocator At3g17430 OS=Arabidopsis thaliana OX=3702 GN=At3g17430 PE=1 SV=1	--	--	--	--	--	--	--	--
CacGene16900	39.1574	0	-7.72049	3.97e-08	DOWN	-	-	GO:0001522||GO:0009451||GO:0008152||GO:0006139||GO:0006725||GO:0006807||GO:0008150||GO:0009987||GO:0016070||GO:0034641||GO:0043170||GO:0043412||GO:0044237||GO:0044238||GO:0046483||GO:0071704||GO:0090304||GO:1901360	pseudouridine synthesis||RNA modification||metabolic process||nucleobase-containing compound metabolic process||cellular aromatic compound metabolic process||nitrogen compound metabolic process||biological_process||cellular process||RNA metabolic process||cellular nitrogen compound metabolic process||macromolecule metabolic process||macromolecule modification||cellular metabolic process||primary …			GO:0003723||GO:0009982||GO:0003674||GO:0003676||GO:0005488||GO:0097159||GO:1901363||GO:0003824||GO:0016853||GO:0016866	RNA binding||pseudouridine synthase activity||molecular_function||nucleic acid binding||binding||organic cyclic compound binding||heterocyclic compound binding||catalytic activity||isomerase activity||intramolecular transferase activity	--	--
CacGene02654	96.4315	9.28291	-3.36945	3.98e-08	DOWN	-	sp|K4CWS6|U75C1_SOLLC UDP-glycosyltransferase 75C1 OS=Solanum lycopersicum OX=4081 GN=UGT75C1 PE=1 SV=1	--	--	--	--	--	--	--	--
CacGene04732	159.001	14.5737	-3.45867	3.98e-08	DOWN	PF13962:Domain of unknown function	-	--	--	--	--	--	--	--	--
CacGene16688	710.581	210.06	-1.75764	4.02e-08	DOWN	PF02458:Transferase family	sp|Q9M6E2|DBAT_TAXCU 10-deacetylbaccatin III 10-O-acetyltransferase OS=Taxus cuspidata OX=99806 PE=1 SV=1					GO:0016747||GO:0003674||GO:0003824||GO:0016740||GO:0016746	transferase activity, transferring acyl groups other than amino-acyl groups||molecular_function||catalytic activity||transferase activity||transferase activity, transferring acyl groups	--	--
CacGene19529	3.88459	107.625	4.75098	4.09e-08	UP	-	sp|A0A1C9CX66|CYC2_CAMAC (S)-8-oxocitronellyl enol synthase CYC2 OS=Camptotheca acuminata OX=16922 GN=CYC2 PE=1 SV=1	--	--	--	--	--	--	--	--
novel.161	338.371	0	-10.8333	4.37e-08	DOWN	-	-	--	--	--	--	--	--	--	--
CacGene03974	326.372	30.8766	-3.40696	4.43e-08	DOWN	PF00368:Hydroxymethylglutaryl-coenzyme A reductase	sp|A0A0A1C930|HMR2A_PANGI 3-hydroxy-3-methylglutaryl coenzyme A reductase 2-A OS=Panax ginseng OX=4054 GN=HMGR2 PE=2 SV=1	GO:0015936||GO:0055114||GO:0008152||GO:0006139||GO:0006163||GO:0006725||GO:0006732||GO:0006753||GO:0006793||GO:0006796||GO:0006807||GO:0008150||GO:0009117||GO:0009150||GO:0009259||GO:0009987||GO:0019637||GO:0019693||GO:0033865||GO:0033875||GO:0034032||GO:0034641||GO:0044237||GO:0044238||GO:0044281||GO:0046483||GO:0051186||GO:0055086||GO:0071704||GO:0072521||GO:1901135||GO:1901360||GO:1901564	coenzyme A metabolic process||oxidation-reduction process||metabolic process||nucleobase-containing compound metabolic process||purine nucleotide metabolic process||cellular aromatic compound metabolic process||coenzyme metabolic process||nucleoside phosphate metabolic process||phosphorus metabolic process||phosphate-containing compound metabolic process||nitrogen compound metabolic process||biol…			GO:0004420||GO:0050662||GO:0016616||GO:0003674||GO:0003824||GO:0016491||GO:0016614||GO:0005488||GO:0048037	hydroxymethylglutaryl-CoA reductase (NADPH) activity||coenzyme binding||oxidoreductase activity, acting on the CH-OH group of donors, NAD or NADP as acceptor||molecular_function||catalytic activity||oxidoreductase activity||oxidoreductase activity, acting on CH-OH group of donors||binding||cofactor binding	egr00900||egr01100||egr01110	Terpenoid backbone biosynthesis||Metabolic pathways||Biosynthesis of secondary metabolites
CacGene06153	1344.17	357.928	-1.90918	4.53e-08	DOWN	PF04833:COBRA-like protein	sp|Q94KT8|COBRA_ARATH Protein COBRA OS=Arabidopsis thaliana OX=3702 GN=COB PE=2 SV=1	GO:0010215||GO:0016049||GO:0008150||GO:0009664||GO:0009832||GO:0009987||GO:0022607||GO:0016043||GO:0030198||GO:0042546||GO:0043062||GO:0044085||GO:0045229||GO:0070726||GO:0071554||GO:0071555||GO:0071668||GO:0071669||GO:0071840||GO:0040007	cellulose microfibril organization||cell growth||biological_process||plant-type cell wall organization||plant-type cell wall biogenesis||cellular process||cellular component assembly||cellular component organization||extracellular matrix organization||cell wall biogenesis||extracellular structure organization||cellular component biogenesis||external encapsulating structure organization||cell wall…	GO:0031225||GO:0005575||GO:0016020||GO:0031224||GO:0044425	anchored component of membrane||cellular_component||membrane||intrinsic component of membrane||membrane part			--	--
CacGene12298	347.556	14.9258	-4.5473	4.54e-08	DOWN	PF05368:NmrA-like family	sp|E1U332|ALL12_OLEEU Isoflavone reductase-like protein OS=Olea europaea OX=4146 PE=1 SV=1	--	--	--	--	--	--	--	--
CacGene18406	1031.98	3667.37	1.82909	4.62e-08	UP	PF03171:2OG-Fe(II) oxygenase superfamily|PF14226:non-haem dioxygenase in morphine synthesis N-terminal	sp|O80449|JOX4_ARATH Jasmonate-induced oxygenase 4 OS=Arabidopsis thaliana OX=3702 GN=JOX4 PE=1 SV=1	GO:0055114||GO:0008152||GO:0008150	oxidation-reduction process||metabolic process||biological_process			GO:0016491||GO:0003674||GO:0003824	oxidoreductase activity||molecular_function||catalytic activity	--	--
CacGene20977	405.587	1498.62	1.88667	4.74e-08	UP	PF00097:Zinc finger, C3HC4 type (RING finger)	sp|Q6R567|RMA1_CAPAN E3 ubiquitin-protein ligase RMA1H1 OS=Capsicum annuum OX=4072 GN=RMA1H1 PE=1 SV=1					GO:0046872||GO:0003674||GO:0005488||GO:0043167||GO:0043169	metal ion binding||molecular_function||binding||ion binding||cation binding	egr04141	Protein processing in endoplasmic reticulum
CacGene21729	48.8156	1.69839	-4.85641	4.78e-08	DOWN	PF14226:non-haem dioxygenase in morphine synthesis N-terminal	sp|Q39224|SRG1_ARATH Protein SRG1 OS=Arabidopsis thaliana OX=3702 GN=SRG1 PE=2 SV=1	--	--	--	--	--	--	--	--
CacGene02894	1139.79	67.8601	-4.06924	4.82e-08	DOWN	PF13302:Acetyltransferase (GNAT) domain	sp|O31633|YJCK_BACSU Putative [ribosomal protein S5]-alanine N-acetyltransferase OS=Bacillus subtilis (strain 168) OX=224308 GN=yjcK PE=3 SV=1	--	--	--	--	--	--	--	--
CacGene08223	366.068	122.09	-1.58584	4.85e-08	DOWN	PF02779:Transketolase, pyrimidine binding domain|PF02780:Transketolase, C-terminal domain|PF13292:3-deoxy-D-xylulose-1-phosphate synthase	sp|Q39088|DOF34_ARATH Dof zinc finger protein DOF3.4 OS=Arabidopsis thaliana OX=3702 GN=DOF3.4 PE=1 SV=2	GO:0006355||GO:0008152||GO:0006139||GO:0006351||GO:0006725||GO:0006807||GO:0008150||GO:0009058||GO:0009059||GO:0009889||GO:0009987||GO:0010467||GO:0010468||GO:0010556||GO:0016070||GO:0018130||GO:0019219||GO:0019222||GO:0019438||GO:0031323||GO:0031326||GO:0032774||GO:0034641||GO:0034645||GO:0034654||GO:0043170||GO:0044237||GO:0044238||GO:0044249||GO:0044260||GO:0044271||GO:0046483||GO:0050789||GO:…	regulation of transcription, DNA-templated||metabolic process||nucleobase-containing compound metabolic process||transcription, DNA-templated||cellular aromatic compound metabolic process||nitrogen compound metabolic process||biological_process||biosynthetic process||macromolecule biosynthetic process||regulation of biosynthetic process||cellular process||gene expression||regulation of gene expre…			GO:0003677||GO:0003674||GO:0003676||GO:0005488||GO:0097159||GO:1901363	DNA binding||molecular_function||nucleic acid binding||binding||organic cyclic compound binding||heterocyclic compound binding	--	--
CacGene05594	498.342	30.6242	-4.02813	4.94e-08	DOWN	PF00249:Myb-like DNA-binding domain	sp|Q9SEI0|WER_ARATH Transcription factor WER OS=Arabidopsis thaliana OX=3702 GN=WER PE=1 SV=1					GO:0003677||GO:0003674||GO:0003676||GO:0005488||GO:0097159||GO:1901363	DNA binding||molecular_function||nucleic acid binding||binding||organic cyclic compound binding||heterocyclic compound binding	--	--
CacGene08106	16.4035	135.734	3.03507	4.94e-08	UP	-	sp|Q9LQX2|MPSR1_ARATH E3 ubiquitin-protein ligase MPSR1 OS=Arabidopsis thaliana OX=3702 GN=MPSR1 PE=1 SV=1	--	--	--	--	--	--	--	--
CacGene17613	500.72	1495.52	1.57908	5.04e-08	UP	PF06880:Protein of unknown function (DUF1262)	-	--	--	--	--	--	--	--	--
CacGene01334	973.524	176.54	-2.46366	5.04e-08	DOWN	PF00646:F-box domain	sp|Q9FHS6|FK119_ARATH F-box/kelch-repeat protein At5g43190 OS=Arabidopsis thaliana OX=3702 GN=At5g43190 PE=2 SV=1					GO:0005515||GO:0003674||GO:0005488	protein binding||molecular_function||binding	--	--
CacGene01024	531.681	1421.28	1.41849	5.04e-08	UP	PF05180:DNL zinc finger	-					GO:0008270||GO:0003674||GO:0005488||GO:0046872||GO:0043167||GO:0043169||GO:0046914	zinc ion binding||molecular_function||binding||metal ion binding||ion binding||cation binding||transition metal ion binding	--	--
CacGene09450	8.40493	71.329	3.06493	5.19e-08	UP	PF02779:Transketolase, pyrimidine binding domain|PF02780:Transketolase, C-terminal domain|PF13292:8-deoxy-U-xylulose-3-phosphate synthase	sp|Q336N8|JM706_ORYSJ Lysine-specific demethylase JMJ706 OS=Oryza sativa subsp. japonica OX=39947 GN=JMJ706 PE=2 SV=1	--	--	--	--	--	--	--	--
CacGene06032	1154.38	2935.89	1.34638	5.24e-08	UP	PF00643:B-box zinc finger|PF06203:CCT motif	sp|Q8RWD0|COL16_ARATH Zinc finger protein CONSTANS-LIKE 16 OS=Arabidopsis thaliana OX=3702 GN=COL16 PE=1 SV=2					GO:0008270||GO:0005515||GO:0003674||GO:0005488||GO:0046872||GO:0043167||GO:0043169||GO:0046914	zinc ion binding||protein binding||molecular_function||binding||metal ion binding||ion binding||cation binding||transition metal ion binding	--	--
CacGene05556	358.324	1410.84	1.97667	5.46e-08	UP	PF12972:Alpha-N-acetylglucosaminidase (NAGLU) C-terminal domain|PF05089:Alpha-N-acetylglucosaminidase (NAGLU) tim-barrel domain	sp|Q9FNA3|NAGLU_ARATH Alpha-N-acetylglucosaminidase OS=Arabidopsis thaliana OX=3702 GN=NAGLU PE=2 SV=1	--	--	--	--	--	--	egr00531||egr01100	Glycosaminoglycan degradation||Metabolic pathways
CacGene20139	91.7968	9.59859	-3.24811	5.54e-08	DOWN	PF00582:Universal stress protein family|PF00069:Protein kinase domain	sp|Q9SGY7|PEK11_ARATH Putative proline-rich receptor-like protein kinase PERK11 OS=Arabidopsis thaliana OX=3702 GN=PERK11 PE=2 SV=2	GO:0006468||GO:0008152||GO:0006464||GO:0006793||GO:0006796||GO:0006807||GO:0008150||GO:0009987||GO:0016310||GO:0019538||GO:0036211||GO:0043170||GO:0043412||GO:0044237||GO:0044238||GO:0044260||GO:0044267||GO:0071704||GO:1901564	protein phosphorylation||metabolic process||cellular protein modification process||phosphorus metabolic process||phosphate-containing compound metabolic process||nitrogen compound metabolic process||biological_process||cellular process||phosphorylation||protein metabolic process||protein modification process||macromolecule metabolic process||macromolecule modification||cellular metabolic process|…			GO:0004672||GO:0005524||GO:0003674||GO:0003824||GO:0016301||GO:0016740||GO:0016772||GO:0016773||GO:0140096||GO:0000166||GO:0005488||GO:0008144||GO:0017076||GO:0030554||GO:0032553||GO:0032555||GO:0032559||GO:0035639||GO:0036094||GO:0043167||GO:0043168||GO:0097159||GO:0097367||GO:1901265||GO:1901363	protein kinase activity||ATP binding||molecular_function||catalytic activity||kinase activity||transferase activity||transferase activity, transferring phosphorus-containing groups||phosphotransferase activity, alcohol group as acceptor||catalytic activity, acting on a protein||nucleotide binding||binding||drug binding||purine nucleotide binding||adenyl nucleotide binding||ribonucleotide binding|…	--	--
novel.92	0	45.5198	7.99208	5.61e-08	UP	-	-	--	--	--	--	--	--	--	--
CacGene03239	63.849	628.154	3.29489	5.61e-08	UP	PF01397:Terpene synthase, N-terminal domain|PF03936:Terpene synthase family, metal binding domain	sp|A0A0U3LQ20|CPS5_SALMI Ent-copalyl diphosphate synthase, chloroplastic OS=Salvia miltiorrhiza OX=226208 GN=CPS5 PE=1 SV=1					GO:0010333||GO:0016829||GO:0000287||GO:0003674||GO:0003824||GO:0016835||GO:0016838||GO:0005488||GO:0046872||GO:0043167||GO:0043169	terpene synthase activity||lyase activity||magnesium ion binding||molecular_function||catalytic activity||carbon-oxygen lyase activity||carbon-oxygen lyase activity, acting on phosphates||binding||metal ion binding||ion binding||cation binding	egr00904||egr01100||egr01110	Diterpenoid biosynthesis||Metabolic pathways||Biosynthesis of secondary metabolites
CacGene14032	0.687039	54.7425	6.3967	6.13e-08	UP	PF13855:Leucine rich repeat|PF00931:NB-ARC domain	sp|P0CB16|DRL25_ARATH Putative disease resistance protein At4g19050 OS=Arabidopsis thaliana OX=3702 GN=At4g19050 PE=3 SV=2					GO:0005515||GO:0043531||GO:0003674||GO:0005488||GO:0000166||GO:0017076||GO:0030554||GO:0032553||GO:0032555||GO:0032559||GO:0036094||GO:0043167||GO:0043168||GO:0097159||GO:0097367||GO:1901265||GO:1901363	protein binding||ADP binding||molecular_function||binding||nucleotide binding||purine nucleotide binding||adenyl nucleotide binding||ribonucleotide binding||purine ribonucleotide binding||adenyl ribonucleotide binding||small molecule binding||ion binding||anion binding||organic cyclic compound binding||carbohydrate derivative binding||nucleoside phosphate binding||heterocyclic compound binding	--	--
CacGene27821	37.7524	0	-7.66779	6.22e-08	DOWN	-	-	--	--	--	--	--	--	--	--
CacGene14599	123.142	17.2307	-2.84195	6.63e-08	DOWN	PF03514:GRAS domain family	sp|Q9CAN3|SCL28_ARATH Scarecrow-like protein 28 OS=Arabidopsis thaliana OX=3702 GN=SCL28 PE=1 SV=1	--	--	--	--	--	--	--	--
CacGene17457	387.967	123.052	-1.65517	6.64e-08	DOWN	PF13962:Domain of unknown function|PF12796:Ankyrin repeats (3 copies)	-	--	--	--	--	--	--	--	--
CacGene09651	145.619	25.5185	-2.51625	6.71e-08	DOWN	PF13855:Leucine rich repeat|PF08263:Leucine rich repeat N-terminal domain	sp|O65375|LRX1_ARATH Leucine-rich repeat extensin-like protein 1 OS=Arabidopsis thaliana OX=3702 GN=LRX1 PE=1 SV=1					GO:0005515||GO:0003674||GO:0005488	protein binding||molecular_function||binding	--	--
CacGene15479	813.748	141.186	-2.52718	7.26e-08	DOWN	PF03171:2OG-Fe(II) oxygenase superfamily|PF14226:non-haem dioxygenase in morphine synthesis N-terminal	sp|Q7XZQ7|FL3H_PETCR Flavanone 3-dioxygenase OS=Petroselinum crispum OX=4043 GN=FHT PE=1 SV=1	GO:0055114||GO:0008152||GO:0008150	oxidation-reduction process||metabolic process||biological_process			GO:0016491||GO:0003674||GO:0003824	oxidoreductase activity||molecular_function||catalytic activity	--	--
CacGene08399	146.465	8.85996	-4.0513	7.29e-08	DOWN	PF01070:FMN-dependent dehydrogenase	sp|Q00624|ASOL_BRANA L-ascorbate oxidase homolog OS=Brassica napus OX=3708 GN=Bp10 PE=2 SV=1	GO:0055114||GO:0008152||GO:0008150	oxidation-reduction process||metabolic process||biological_process			GO:0005507||GO:0016491||GO:0003674||GO:0005488||GO:0046872||GO:0043167||GO:0043169||GO:0046914||GO:0003824	copper ion binding||oxidoreductase activity||molecular_function||binding||metal ion binding||ion binding||cation binding||transition metal ion binding||catalytic activity	--	--
CacGene11676	2.43718	110.874	5.47222	7.39e-08	UP	PF00201:UDP-glucoronosyl and UDP-glucosyl transferase	sp|G3FIN9|UGTK5_MANES Linamarin synthase 2 OS=Manihot esculenta OX=3983 GN=UGT85K5 PE=1 SV=1					GO:0016758||GO:0003674||GO:0003824||GO:0016740||GO:0016757	transferase activity, transferring hexosyl groups||molecular_function||catalytic activity||transferase activity||transferase activity, transferring glycosyl groups	--	--
CacGene20858	4296.5	1749.76	-1.29592	7.39e-08	DOWN	PF00800:Prephenate dehydratase	sp|D3U715|AROD1_PETHY Arogenate dehydratase 1 OS=Petunia hybrida OX=4102 GN=ADT1 PE=1 SV=1	GO:0009094||GO:0008152||GO:0006082||GO:0006520||GO:0006558||GO:0006725||GO:0006807||GO:0008150||GO:0008652||GO:0009058||GO:0009072||GO:0009073||GO:0009095||GO:0009987||GO:0016053||GO:0017144||GO:0019438||GO:0019752||GO:0043436||GO:0044237||GO:0044238||GO:0044249||GO:0044281||GO:0044283||GO:0046394||GO:0071704||GO:1901360||GO:1901362||GO:1901564||GO:1901566||GO:1901576||GO:1901605||GO:1901607||GO:…	L-phenylalanine biosynthetic process||metabolic process||organic acid metabolic process||cellular amino acid metabolic process||L-phenylalanine metabolic process||cellular aromatic compound metabolic process||nitrogen compound metabolic process||biological_process||cellular amino acid biosynthetic process||biosynthetic process||aromatic amino acid family metabolic process||aromatic amino acid fam…			GO:0004664||GO:0003674||GO:0003824||GO:0016829||GO:0016835||GO:0016836	prephenate dehydratase activity||molecular_function||catalytic activity||lyase activity||carbon-oxygen lyase activity||hydro-lyase activity	egr00400||egr01100||egr01110||egr01230	Phenylalanine, tyrosine and tryptophan biosynthesis||Metabolic pathways||Biosynthesis of secondary metabolites||Biosynthesis of amino acids
CacGene00048	734.439	243.915	-1.59131	8e-08	DOWN	PF07765:KIP1-like protein	sp|F4KEW8|NET4A_ARATH Protein NETWORKED 4A OS=Arabidopsis thaliana OX=3702 GN=NET4A PE=2 SV=1					GO:0003779||GO:0005515||GO:0003674||GO:0005488||GO:0008092	actin binding||protein binding||molecular_function||binding||cytoskeletal protein binding	--	--
CacGene02656	18.7326	99.8061	2.42404	8e-08	UP	-	sp|A7MAS5|75L17_MALDO Phloretin 4'-O-glucosyltransferase OS=Malus domestica OX=3750 GN=UGT75L17 PE=1 SV=1	--	--	--	--	--	--	--	--
CacGene23503	110.394	438.625	1.99122	8.05e-08	UP	-	-	--	--	--	--	--	--	--	--
CacGene01169	232.677	931.075	1.9995	8.07e-08	UP	-	sp|Q9C9Q4|JAC1_ARATH J domain-containing protein required for chloroplast accumulation response 1 OS=Arabidopsis thaliana OX=3702 GN=JAC1 PE=1 SV=1	--	--	--	--	--	--	--	--
CacGene27741	92.0397	6.41587	-3.8448	8.59e-08	DOWN	PF01150:GDA1/CD39 (nucleoside phosphatase) family|PF12906:RING-variant domain	sp|O80612|APY6_ARATH Probable apyrase 6 OS=Arabidopsis thaliana OX=3702 GN=APY6 PE=2 SV=2					GO:0016787||GO:0008270||GO:0003674||GO:0003824||GO:0005488||GO:0046872||GO:0043167||GO:0043169||GO:0046914	hydrolase activity||zinc ion binding||molecular_function||catalytic activity||binding||metal ion binding||ion binding||cation binding||transition metal ion binding	egr00230||egr00240||egr01100||egr01110||egr01232	Purine metabolism||Pyrimidine metabolism||Metabolic pathways||Biosynthesis of secondary metabolites||Nucleotide metabolism
CacGene24978	7388.94	27521.1	1.89705	8.67e-08	UP	-	sp|Q7X9A0|RCA1_LARTR Ribulose bisphosphate carboxylase/oxygenase activase 1, chloroplastic OS=Larrea tridentata OX=66636 GN=RCA1 PE=1 SV=1	--	--	--	--	--	--	--	--
CacGene05974	26.9655	188.622	2.79421	9.13e-08	UP	PF02798:Glutathione S-transferase, N-terminal domain	sp|Q9FQA3|GST23_MAIZE Glutathione transferase GST 23 OS=Zea mays OX=4577 PE=2 SV=1					GO:0005515||GO:0003674||GO:0005488	protein binding||molecular_function||binding	egr00480||egr01100	Glutathione metabolism||Metabolic pathways
CacGene11006	216.226	50.1544	-2.10518	9.34e-08	DOWN	-	sp|O24301|SUS2_PEA Sucrose synthase 2 OS=Pisum sativum OX=3888 GN=SUS2 PE=2 SV=1	--	--	--	--	--	--	egr00500||egr01100||egr01110	Starch and sucrose metabolism||Metabolic pathways||Biosynthesis of secondary metabolites
CacGene00933	86.1046	4.68788	-4.1995	9.68e-08	DOWN	PF02779:Transketolase, pyrimidine binding domain|PF02780:Transketolase, C-terminal domain|PF13292:8-deoxy-D-xylulose-4-phosphate synthase	sp|Q6Z244|ODD19_ORYSJ 2-oxoglutarate-dependent dioxygenase 19 OS=Oryza sativa subsp. japonica OX=39947 GN=2ODD19 PE=1 SV=1	GO:0055114||GO:0008152||GO:0008150	oxidation-reduction process||metabolic process||biological_process			GO:0016491||GO:0003674||GO:0003824	oxidoreductase activity||molecular_function||catalytic activity	--	--
CacGene06527	697.121	2415.97	1.79254	1.01e-07	UP	PF03168:Late embryogenesis abundant protein	sp|P46519|LEA14_SOYBN Desiccation protectant protein Lea14 homolog OS=Glycine max OX=3847 PE=2 SV=1	--	--	--	--	--	--	--	--
CacGene18141	113.379	384.593	1.75964	1.01e-07	UP	PF02779:Transketolase, pyrimidine binding domain|PF02780:Transketolase, C-terminal domain|PF13292:1-deoxy-U-xylulose-1-phosphate synthase	sp|Q6AVN2|SIRP1_ORYSJ E3 ubiquitin-protein ligase SIRP1 OS=Oryza sativa subsp. japonica OX=39947 GN=SIRP1 PE=1 SV=1	--	--	--	--	--	--	--	--
CacGene20779	94.3946	497.361	2.39826	1.01e-07	UP	PF13905:Thioredoxin-like	sp|Q8VZQ0|NRX3_ARATH Probable nucleoredoxin 3 OS=Arabidopsis thaliana OX=3702 GN=At4g31240 PE=2 SV=1	--	--	--	--	--	--	--	--
CacGene10558	630.149	4370.16	2.79403	1.03e-07	UP	PF14541:Xylanase inhibitor C-terminal|PF14543:Xylanase inhibitor N-terminal	sp|Q8S9J6|ASPA_ARATH Aspartyl protease family protein At5g10770 OS=Arabidopsis thaliana OX=3702 GN=At5g10770 PE=2 SV=1	--	--	--	--	--	--	--	--
CacGene08194	160.745	852.258	2.40569	1.04e-07	UP	PF05701:Weak chloroplast movement under blue light	sp|O48724|WEB1_ARATH Protein WEAK CHLOROPLAST MOVEMENT UNDER BLUE LIGHT 1 OS=Arabidopsis thaliana OX=3702 GN=WEB1 PE=1 SV=1	--	--	--	--	--	--	--	--
CacGene21211	1.78542	72.6217	5.28401	1.13e-07	UP	PF03107:C1 domain|PF14009:Domain of unknown function (DUF4228)	-	--	--	--	--	--	--	--	--
CacGene00930	198.339	1044.47	2.39604	1.19e-07	UP	PF02779:Transketolase, pyrimidine binding domain|PF02780:Transketolase, C-terminal domain|PF13292:1-deoxy-U-xylulose-2-phosphate synthase	sp|Q6Z244|ODD19_ORYSJ 2-oxoglutarate-dependent dioxygenase 19 OS=Oryza sativa subsp. japonica OX=39947 GN=2ODD19 PE=1 SV=1	GO:0055114||GO:0008152||GO:0008150	oxidation-reduction process||metabolic process||biological_process			GO:0016491||GO:0003674||GO:0003824	oxidoreductase activity||molecular_function||catalytic activity	--	--
novel.1702	138.579	446.697	1.68715	1.2e-07	UP	-	-	--	--	--	--	--	--	--	--
CacGene07091	329.859	98.6853	-1.7406	1.2e-07	DOWN	PF02779:Transketolase, pyrimidine binding domain|PF02780:Transketolase, C-terminal domain|PF13292:3-deoxy-D-xylulose-1-phosphate synthase	sp|Q69WS3|BH094_ORYSJ Transcription factor BHLH094 OS=Oryza sativa subsp. japonica OX=39947 GN=BHLH094 PE=1 SV=2					GO:0046983||GO:0005515||GO:0003674||GO:0005488	protein dimerization activity||protein binding||molecular_function||binding	--	--
CacGene12686	31.6865	428.105	3.74692	1.22e-07	UP	PF01554:MatE	sp|Q9FKQ1|DTX27_ARATH Protein DETOXIFICATION 27 OS=Arabidopsis thaliana OX=3702 GN=DTX27 PE=2 SV=1	GO:0006855||GO:0055085||GO:0006810||GO:0008150||GO:0042493||GO:0015893||GO:0042221||GO:0050896||GO:0051179||GO:0051234	drug transmembrane transport||transmembrane transport||transport||biological_process||response to drug||drug transport||response to chemical||response to stimulus||localization||establishment of localization	GO:0016020||GO:0005575	membrane||cellular_component	GO:0015238||GO:0015297||GO:0003674||GO:0005215||GO:0022857||GO:0015291||GO:0022804	drug transmembrane transporter activity||antiporter activity||molecular_function||transporter activity||transmembrane transporter activity||secondary active transmembrane transporter activity||active transmembrane transporter activity	--	--
CacGene26451	101.62	518.185	2.34778	1.22e-07	UP	PF03171:2OG-Fe(II) oxygenase superfamily|PF14226:non-haem dioxygenase in morphine synthesis N-terminal	sp|Q39224|SRG1_ARATH Protein SRG1 OS=Arabidopsis thaliana OX=3702 GN=SRG1 PE=2 SV=1	GO:0055114||GO:0008152||GO:0008150	oxidation-reduction process||metabolic process||biological_process			GO:0016491||GO:0003674||GO:0003824	oxidoreductase activity||molecular_function||catalytic activity	--	--
CacGene06057	400.028	1122.26	1.48909	1.25e-07	UP	-	-	--	--	--	--	--	--	--	--
CacGene27269	61.0681	1.69839	-5.1754	1.27e-07	DOWN	PF02779:Transketolase, pyrimidine binding domain|PF02780:Transketolase, C-terminal domain|PF13292:0-deoxy-U-xylulose-7-phosphate synthase	-	--	--	--	--	--	--	--	--
CacGene26317	1222.55	334.174	-1.87083	1.27e-07	DOWN	PF00544:Pectate lyase	sp|Q9SCP2|PLY12_ARATH Probable pectate lyase 12 OS=Arabidopsis thaliana OX=3702 GN=At3g53190 PE=2 SV=2	--	--	--	--	--	--	egr00040||egr01100	Pentose and glucuronate interconversions||Metabolic pathways
CacGene25486	261.942	68.523	-1.9364	1.28e-07	DOWN	-	-	--	--	--	--	--	--	--	--
CacGene18232	215.789	684.237	1.66448	1.3e-07	UP	PF00083:Sugar (and other) transporter	sp|Q07423|HEX6_RICCO Hexose carrier protein HEX6 OS=Ricinus communis OX=3988 GN=HEX6 PE=2 SV=1	GO:0055085||GO:0006810||GO:0008150||GO:0051179||GO:0051234	transmembrane transport||transport||biological_process||localization||establishment of localization	GO:0016021||GO:0005575||GO:0016020||GO:0031224||GO:0044425	integral component of membrane||cellular_component||membrane||intrinsic component of membrane||membrane part	GO:0022857||GO:0003674||GO:0005215	transmembrane transporter activity||molecular_function||transporter activity	--	--
CacGene22867	812.727	228.147	-1.83338	1.32e-07	DOWN	PF00022:Actin	sp|P30171|ACT11_SOLTU Actin-97 OS=Solanum tuberosum OX=4113 GN=AC97 PE=3 SV=1	--	--	--	--	--	--	--	--
CacGene25083	1363.07	3999.52	1.55308	1.34e-07	UP	PF02779:Transketolase, pyrimidine binding domain|PF02780:Transketolase, C-terminal domain|PF13292:1-deoxy-U-xylulose-1-phosphate synthase	sp|Q9ZNS2|GH310_ARATH Indole-3-acetic acid-amido synthetase GH3.10 OS=Arabidopsis thaliana OX=3702 GN=GH3.10 PE=2 SV=1	--	--	--	--	--	--	egr04075	Plant hormone signal transduction
CacGene24757	15.0244	105.806	2.80527	1.35e-07	UP	-	-	--	--	--	--	--	--	--	--
CacGene18421	1764.73	4853.84	1.45961	1.37e-07	UP	-	sp|Q9LVZ5|PIFI_ARATH Protein POST-ILLUMINATION CHLOROPHYLL FLUORESCENCE INCREASE, chloroplastic OS=Arabidopsis thaliana OX=3702 GN=PIFI PE=2 SV=1	--	--	--	--	--	--	--	--
CacGene04842	226.721	68.9517	-1.71486	1.38e-07	DOWN	PF00657:GDSL-like Lipase/Acylhydrolase	sp|Q7Y1X1|EST_HEVBR Esterase OS=Hevea brasiliensis OX=3981 PE=1 SV=1					GO:0016788||GO:0003674||GO:0003824||GO:0016787	hydrolase activity, acting on ester bonds||molecular_function||catalytic activity||hydrolase activity	--	--
CacGene23369	307.268	2537.31	3.04464	1.39e-07	UP	PF00005:ABC transporter|PF01061:ABC-2 type transporter|PF14510:ABC-transporter N-terminal|PF08370:Plant PDR ABC transporter associated	sp|Q9XIE2|AB36G_ARATH ABC transporter G family member 36 OS=Arabidopsis thaliana OX=3702 GN=ABCG36 PE=1 SV=1			GO:0016020||GO:0005575	membrane||cellular_component	GO:0005524||GO:0016887||GO:0000166||GO:0003674||GO:0005488||GO:0008144||GO:0017076||GO:0030554||GO:0032553||GO:0032555||GO:0032559||GO:0035639||GO:0036094||GO:0043167||GO:0043168||GO:0097159||GO:0097367||GO:1901265||GO:1901363||GO:0003824||GO:0017111||GO:0016462||GO:0016787||GO:0016817||GO:0016818	ATP binding||ATPase activity||nucleotide binding||molecular_function||binding||drug binding||purine nucleotide binding||adenyl nucleotide binding||ribonucleotide binding||purine ribonucleotide binding||adenyl ribonucleotide binding||purine ribonucleoside triphosphate binding||small molecule binding||ion binding||anion binding||organic cyclic compound binding||carbohydrate derivative binding||nucl…	egr02010	ABC transporters
CacGene23300	16.5148	101.826	2.62765	1.4e-07	UP	PF00481:Protein phosphatase 2C	sp|Q94AT1|P2C76_ARATH Probable protein phosphatase 2C 76 OS=Arabidopsis thaliana OX=3702 GN=At5g53140 PE=2 SV=1					GO:0003824||GO:0003674	catalytic activity||molecular_function	--	--
CacGene09143	1379.72	205.515	-2.74813	1.4e-07	DOWN	PF02298:Plastocyanin-like domain|PF03140:Plant protein of unknown function	sp|Q9SK27|ENL1_ARATH Early nodulin-like protein 1 OS=Arabidopsis thaliana OX=3702 GN=At2g25060 PE=2 SV=2					GO:0009055||GO:0003674||GO:0003824||GO:0016491	electron transfer activity||molecular_function||catalytic activity||oxidoreductase activity	--	--
CacGene23478	186.39	7.79924	-4.56939	1.42e-07	DOWN	PF00082:Subtilase family|PF05922:Peptidase inhibitor I9	sp|A9JQS7|SBTS_LOTJA Subtilisin-like serine-protease S OS=Lotus japonicus OX=34305 GN=SbtS PE=2 SV=1	GO:0006508||GO:0008152||GO:0006807||GO:0008150||GO:0019538||GO:0043170||GO:0044238||GO:0071704||GO:1901564	proteolysis||metabolic process||nitrogen compound metabolic process||biological_process||protein metabolic process||macromolecule metabolic process||primary metabolic process||organic substance metabolic process||organonitrogen compound metabolic process			GO:0004252||GO:0003674||GO:0003824||GO:0004175||GO:0008236||GO:0008233||GO:0070011||GO:0016787||GO:0017171||GO:0140096	serine-type endopeptidase activity||molecular_function||catalytic activity||endopeptidase activity||serine-type peptidase activity||peptidase activity||peptidase activity, acting on L-amino acid peptides||hydrolase activity||serine hydrolase activity||catalytic activity, acting on a protein	--	--
CacGene13764	74.9778	0	-8.66122	1.42e-07	DOWN	PF01373:Glycosyl hydrolase family 14	sp|O64407|AMYB_VIGUN Beta-amylase OS=Vigna unguiculata OX=3917 GN=BMY1 PE=2 SV=1	GO:0000272||GO:0008152||GO:0005975||GO:0005976||GO:0008150||GO:0009056||GO:0009057||GO:0016052||GO:0043170||GO:0044238||GO:0071704||GO:1901575	polysaccharide catabolic process||metabolic process||carbohydrate metabolic process||polysaccharide metabolic process||biological_process||catabolic process||macromolecule catabolic process||carbohydrate catabolic process||macromolecule metabolic process||primary metabolic process||organic substance metabolic process||organic substance catabolic process			GO:0016161||GO:0003674||GO:0003824||GO:0004553||GO:0016160||GO:0016787||GO:0016798	beta-amylase activity||molecular_function||catalytic activity||hydrolase activity, hydrolyzing O-glycosyl compounds||amylase activity||hydrolase activity||hydrolase activity, acting on glycosyl bonds	egr00500||egr01100||egr01110	Starch and sucrose metabolism||Metabolic pathways||Biosynthesis of secondary metabolites
CacGene25889	9078.28	30540	1.75017	1.47e-07	UP	PF01070:FMN-dependent dehydrogenase	sp|P05414|GOX_SPIOL Peroxisomal (S)-2-hydroxy-acid oxidase OS=Spinacia oleracea OX=3562 PE=1 SV=1					GO:0016491||GO:0003674||GO:0003824	oxidoreductase activity||molecular_function||catalytic activity	egr00630||egr01100||egr01110||egr01200||egr04146	Glyoxylate and dicarboxylate metabolism||Metabolic pathways||Biosynthesis of secondary metabolites||Carbon metabolism||Peroxisome
CacGene02133	172.153	479.292	1.47704	1.49e-07	UP	PF12315:Protein DA1|PF00412:LIM domain	sp|Q8W4F0|DAR1_ARATH Protein DA1-related 1 OS=Arabidopsis thaliana OX=3702 GN=DAR1 PE=1 SV=3	--	--	--	--	--	--	--	--
CacGene07109	855.483	2782.58	1.70145	1.52e-07	UP	PF00536:SAM domain (Sterile alpha motif)	sp|O48716|JGB_ARATH Protein JINGUBANG OS=Arabidopsis thaliana OX=3702 GN=JGB PE=1 SV=1					GO:0005515||GO:0003674||GO:0005488	protein binding||molecular_function||binding	--	--
CacGene23805	4560.44	10182.4	1.15887	1.53e-07	UP	PF00067:Cytochrome P450	sp|Q9C5Y2|KAO2_ARATH Ent-kaurenoic acid oxidase 2 OS=Arabidopsis thaliana OX=3702 GN=KAO2 PE=1 SV=2	GO:0055114||GO:0008152||GO:0008150	oxidation-reduction process||metabolic process||biological_process			GO:0005506||GO:0016705||GO:0020037||GO:0003674||GO:0005488||GO:0046872||GO:0043167||GO:0043169||GO:0046914||GO:0003824||GO:0016491||GO:0046906||GO:0048037||GO:0097159||GO:1901363	iron ion binding||oxidoreductase activity, acting on paired donors, with incorporation or reduction of molecular oxygen||heme binding||molecular_function||binding||metal ion binding||ion binding||cation binding||transition metal ion binding||catalytic activity||oxidoreductase activity||tetrapyrrole binding||cofactor binding||organic cyclic compound binding||heterocyclic compound binding	egr00904||egr01100||egr01110	Diterpenoid biosynthesis||Metabolic pathways||Biosynthesis of secondary metabolites
CacGene20824	21.7548	137.609	2.65046	1.57e-07	UP	PF13912:C2H2-type zinc finger	sp|Q681X4|ZAT5_ARATH Zinc finger protein ZAT5 OS=Arabidopsis thaliana OX=3702 GN=ZAT5 PE=2 SV=1	--	--	--	--	--	--	--	--
novel.1887	1.03607	448.706	8.7992	1.58e-07	UP	PF00462:Glutaredoxin	sp|Q8L8Z8|GRXS2_ARATH Monothiol glutaredoxin-S2 OS=Arabidopsis thaliana OX=3702 GN=GRXS2 PE=3 SV=1					GO:0015035||GO:0015036||GO:0003674||GO:0003824||GO:0016491||GO:0016667	protein disulfide oxidoreductase activity||disulfide oxidoreductase activity||molecular_function||catalytic activity||oxidoreductase activity||oxidoreductase activity, acting on a sulfur group of donors	--	--
CacGene25993	55.4825	629.748	3.50378	1.6e-07	UP	-	sp|Q9FL28|FLS2_ARATH LRR receptor-like serine/threonine-protein kinase FLS2 OS=Arabidopsis thaliana OX=3702 GN=FLS2 PE=1 SV=1	--	--	--	--	--	--	egr04016||egr04626	MAPK signaling pathway - plant||Plant-pathogen interaction
CacGene17624	88.6487	739.48	3.05856	1.64e-07	UP	-	-	--	--	--	--	--	--	--	--
CacGene02130	713.538	2771.2	1.95767	1.65e-07	UP	PF05920:Homeobox KN domain|PF07526:Associated with HOX	sp|Q9SW80|BLH2_ARATH BEL1-like homeodomain protein 2 OS=Arabidopsis thaliana OX=3702 GN=BLH2 PE=1 SV=3	GO:0006355||GO:0008152||GO:0006139||GO:0006351||GO:0006725||GO:0006807||GO:0008150||GO:0009058||GO:0009059||GO:0009889||GO:0009987||GO:0010467||GO:0010468||GO:0010556||GO:0016070||GO:0018130||GO:0019219||GO:0019222||GO:0019438||GO:0031323||GO:0031326||GO:0032774||GO:0034641||GO:0034645||GO:0034654||GO:0043170||GO:0044237||GO:0044238||GO:0044249||GO:0044260||GO:0044271||GO:0046483||GO:0050789||GO:…	regulation of transcription, DNA-templated||metabolic process||nucleobase-containing compound metabolic process||transcription, DNA-templated||cellular aromatic compound metabolic process||nitrogen compound metabolic process||biological_process||biosynthetic process||macromolecule biosynthetic process||regulation of biosynthetic process||cellular process||gene expression||regulation of gene expre…			GO:0003677||GO:0003674||GO:0003676||GO:0005488||GO:0097159||GO:1901363	DNA binding||molecular_function||nucleic acid binding||binding||organic cyclic compound binding||heterocyclic compound binding	--	--
CacGene18552	107.902	17.0868	-2.65542	1.65e-07	DOWN	PF01061:ABC-2 type transporter|PF00005:ABC transporter	sp|Q8RWI9|AB15G_ARATH ABC transporter G family member 15 OS=Arabidopsis thaliana OX=3702 GN=ABCG15 PE=2 SV=2			GO:0016020||GO:0005575	membrane||cellular_component	GO:0005524||GO:0016887||GO:0000166||GO:0003674||GO:0005488||GO:0008144||GO:0017076||GO:0030554||GO:0032553||GO:0032555||GO:0032559||GO:0035639||GO:0036094||GO:0043167||GO:0043168||GO:0097159||GO:0097367||GO:1901265||GO:1901363||GO:0003824||GO:0017111||GO:0016462||GO:0016787||GO:0016817||GO:0016818	ATP binding||ATPase activity||nucleotide binding||molecular_function||binding||drug binding||purine nucleotide binding||adenyl nucleotide binding||ribonucleotide binding||purine ribonucleotide binding||adenyl ribonucleotide binding||purine ribonucleoside triphosphate binding||small molecule binding||ion binding||anion binding||organic cyclic compound binding||carbohydrate derivative binding||nucl…	egr02010	ABC transporters
CacGene21415	28.2926	121.279	2.10452	1.66e-07	UP	-	-	--	--	--	--	--	--	--	--
CacGene16256	185.175	25.1227	-2.887	1.69e-07	DOWN	PF00201:UDP-glucoronosyl and UDP-glucosyl transferase	sp|Q9SJL0|U86A1_ARATH UDP-glycosyltransferase 86A1 OS=Arabidopsis thaliana OX=3702 GN=UGT86A1 PE=2 SV=1					GO:0016758||GO:0003674||GO:0003824||GO:0016740||GO:0016757	transferase activity, transferring hexosyl groups||molecular_function||catalytic activity||transferase activity||transferase activity, transferring glycosyl groups	--	--
CacGene01099	34.2329	248.836	2.85947	1.7e-07	UP	PF00085:Thioredoxin|PF01507:Phosphoadenosine phosphosulfate reductase family	sp|Q9LQZ7|BBX21_ARATH B-box zinc finger protein 21 OS=Arabidopsis thaliana OX=3702 GN=BBX21 PE=1 SV=1					GO:0008270||GO:0003674||GO:0005488||GO:0046872||GO:0043167||GO:0043169||GO:0046914	zinc ion binding||molecular_function||binding||metal ion binding||ion binding||cation binding||transition metal ion binding	--	--
CacGene04056	2168.21	5621.52	1.37458	1.83e-07	UP	PF13855:Leucine rich repeat	sp|Q9XIM0|MEE14_ARATH CCG-binding protein 1 OS=Arabidopsis thaliana OX=3702 GN=MEE14 PE=1 SV=1					GO:0005515||GO:0003674||GO:0005488	protein binding||molecular_function||binding	--	--
novel.266	222.192	0	-10.2263	1.83e-07	DOWN	-	-	--	--	--	--	--	--	--	--
CacGene25930	587.15	69.9869	-3.06862	1.9e-07	DOWN	PF00182:Chitinase class I	sp|Q9M2U5|CHI5_ARATH Endochitinase EP3 OS=Arabidopsis thaliana OX=3702 GN=EP3 PE=1 SV=1	GO:0006032||GO:0016998||GO:0008152||GO:0006022||GO:0006026||GO:0006030||GO:0006040||GO:0006807||GO:0008150||GO:0009056||GO:0009057||GO:0009987||GO:0017144||GO:0042737||GO:0043170||GO:0044237||GO:0044248||GO:0046348||GO:0071704||GO:1901071||GO:1901072||GO:1901135||GO:1901136||GO:1901564||GO:1901565||GO:1901575||GO:0044036||GO:0044260||GO:0071554	chitin catabolic process||cell wall macromolecule catabolic process||metabolic process||aminoglycan metabolic process||aminoglycan catabolic process||chitin metabolic process||amino sugar metabolic process||nitrogen compound metabolic process||biological_process||catabolic process||macromolecule catabolic process||cellular process||drug metabolic process||drug catabolic process||macromolecule met…			GO:0008061||GO:0004568||GO:0003674||GO:0005488||GO:0008144||GO:0097367||GO:0003824||GO:0004553||GO:0016787||GO:0016798	chitin binding||chitinase activity||molecular_function||binding||drug binding||carbohydrate derivative binding||catalytic activity||hydrolase activity, hydrolyzing O-glycosyl compounds||hydrolase activity||hydrolase activity, acting on glycosyl bonds	egr00520||egr01100	Amino sugar and nucleotide sugar metabolism||Metabolic pathways
CacGene05194	3.33814	105.35	5.00099	1.96e-07	UP	PF13561:Enoyl-(Acyl carrier protein) reductase|PF00106:short chain dehydrogenase	sp|P50165|TRNH_DATST Tropinone reductase homolog OS=Datura stramonium OX=4076 PE=2 SV=1	--	--	--	--	--	--	egr00960||egr01100||egr01110	Tropane, piperidine and pyridine alkaloid biosynthesis||Metabolic pathways||Biosynthesis of secondary metabolites
CacGene17652	346.126	1301.12	1.9099	1.97e-07	UP	PF07859:alpha/beta hydrolase fold	sp|Q9MAA7|GID1A_ARATH Gibberellin receptor GID1A OS=Arabidopsis thaliana OX=3702 GN=GID1A PE=1 SV=1					GO:0016787||GO:0003674||GO:0003824	hydrolase activity||molecular_function||catalytic activity	egr04075	Plant hormone signal transduction
CacGene08675	17.4622	277.839	3.98325	1.97e-07	UP	-	-	--	--	--	--	--	--	--	--
CacGene09281	494.847	1170.47	1.24161	2e-07	UP	PF02519:Auxin responsive protein	sp|Q9LTV3|SAU72_ARATH Auxin-responsive protein SAUR72 OS=Arabidopsis thaliana OX=3702 GN=SAUR72 PE=1 SV=1	GO:0009733||GO:0008150||GO:0009719||GO:0009725||GO:0010033||GO:0042221||GO:0050896	response to auxin||biological_process||response to endogenous stimulus||response to hormone||response to organic substance||response to chemical||response to stimulus					egr04075	Plant hormone signal transduction
CacGene05078	600.761	2814.43	2.22831	2.08e-07	UP	PF00067:Cytochrome P450	sp|O81973|C93A3_SOYBN Cytochrome P450 93A3 OS=Glycine max OX=3847 GN=CYP93A3 PE=2 SV=1	GO:0055114||GO:0008152||GO:0008150	oxidation-reduction process||metabolic process||biological_process			GO:0005506||GO:0016705||GO:0020037||GO:0003674||GO:0005488||GO:0046872||GO:0043167||GO:0043169||GO:0046914||GO:0003824||GO:0016491||GO:0046906||GO:0048037||GO:0097159||GO:1901363	iron ion binding||oxidoreductase activity, acting on paired donors, with incorporation or reduction of molecular oxygen||heme binding||molecular_function||binding||metal ion binding||ion binding||cation binding||transition metal ion binding||catalytic activity||oxidoreductase activity||tetrapyrrole binding||cofactor binding||organic cyclic compound binding||heterocyclic compound binding	--	--
CacGene08913	14.5933	128.376	3.13211	2.18e-07	UP	PF00564:PB1 domain	sp|Q84TH9|NLP7_ARATH Protein NLP7 OS=Arabidopsis thaliana OX=3702 GN=NLP7 PE=1 SV=2					GO:0005515||GO:0003674||GO:0005488	protein binding||molecular_function||binding	--	--
CacGene25005	258.63	695.148	1.4268	2.2e-07	UP	PF02779:Transketolase, pyrimidine binding domain|PF02780:Transketolase, C-terminal domain|PF13292:2-deoxy-U-xylulose-1-phosphate synthase	sp|Q7XTV7|HIP1_ORYSJ Probable E3 ubiquitin-protein ligase HIP1 OS=Oryza sativa subsp. japonica OX=39947 GN=HIP1 PE=1 SV=2	--	--	--	--	--	--	--	--
CacGene12334	117.122	350.761	1.58176	2.21e-07	UP	PF01490:Transmembrane amino acid transporter protein	sp|Q9FKS8|LHT1_ARATH Lysine histidine transporter 1 OS=Arabidopsis thaliana OX=3702 GN=LHT1 PE=1 SV=1	--	--	--	--	--	--	--	--
CacGene04846	817.459	3682.47	2.17144	2.24e-07	UP	PF00657:GDSL-like Lipase/Acylhydrolase	sp|Q7Y1X1|EST_HEVBR Esterase OS=Hevea brasiliensis OX=3981 PE=1 SV=1					GO:0016788||GO:0003674||GO:0003824||GO:0016787	hydrolase activity, acting on ester bonds||molecular_function||catalytic activity||hydrolase activity	--	--
CacGene16193	1669.64	6028.4	1.85223	2.27e-07	UP	PF02362:B3 DNA binding domain|PF00847:AP2 domain	sp|Q9ZWM9|RAV1_ARATH AP2/ERF and B3 domain-containing transcription factor RAV1 OS=Arabidopsis thaliana OX=3702 GN=RAV1 PE=1 SV=1	GO:0006355||GO:0008152||GO:0006139||GO:0006351||GO:0006725||GO:0006807||GO:0008150||GO:0009058||GO:0009059||GO:0009889||GO:0009987||GO:0010467||GO:0010468||GO:0010556||GO:0016070||GO:0018130||GO:0019219||GO:0019222||GO:0019438||GO:0031323||GO:0031326||GO:0032774||GO:0034641||GO:0034645||GO:0034654||GO:0043170||GO:0044237||GO:0044238||GO:0044249||GO:0044260||GO:0044271||GO:0046483||GO:0050789||GO:…	regulation of transcription, DNA-templated||metabolic process||nucleobase-containing compound metabolic process||transcription, DNA-templated||cellular aromatic compound metabolic process||nitrogen compound metabolic process||biological_process||biosynthetic process||macromolecule biosynthetic process||regulation of biosynthetic process||cellular process||gene expression||regulation of gene expre…			GO:0003677||GO:0003700||GO:0003674||GO:0003676||GO:0005488||GO:0097159||GO:1901363||GO:0140110	DNA binding||DNA binding transcription factor activity||molecular_function||nucleic acid binding||binding||organic cyclic compound binding||heterocyclic compound binding||transcription regulator activity	--	--
CacGene07626	526.405	80.9484	-2.70153	2.38e-07	DOWN	PF00249:Myb-like DNA-binding domain	sp|Q9SJX8|MYB14_ARATH Transcription factor MYB14 OS=Arabidopsis thaliana OX=3702 GN=MYB14 PE=2 SV=1					GO:0003677||GO:0003674||GO:0003676||GO:0005488||GO:0097159||GO:1901363	DNA binding||molecular_function||nucleic acid binding||binding||organic cyclic compound binding||heterocyclic compound binding	--	--
CacGene19033	630.873	211.974	-1.57448	2.4e-07	DOWN	PF00010:Helix-loop-helix DNA-binding domain	sp|Q9LSE2|ICE1_ARATH Transcription factor ICE1 OS=Arabidopsis thaliana OX=3702 GN=SCRM PE=1 SV=1					GO:0046983||GO:0005515||GO:0003674||GO:0005488	protein dimerization activity||protein binding||molecular_function||binding	--	--
CacGene10504	733.296	1493.1	1.02544	2.4e-07	UP	PF05920:Homeobox KN domain|PF03789:ELK domain|PF03791:KNOX2 domain|PF03790:KNOX1 domain	sp|O04136|KNAP3_MALDO Homeobox protein knotted-1-like 3 OS=Malus domestica OX=3750 PE=2 SV=1	GO:0006355||GO:0008152||GO:0006139||GO:0006351||GO:0006725||GO:0006807||GO:0008150||GO:0009058||GO:0009059||GO:0009889||GO:0009987||GO:0010467||GO:0010468||GO:0010556||GO:0016070||GO:0018130||GO:0019219||GO:0019222||GO:0019438||GO:0031323||GO:0031326||GO:0032774||GO:0034641||GO:0034645||GO:0034654||GO:0043170||GO:0044237||GO:0044238||GO:0044249||GO:0044260||GO:0044271||GO:0046483||GO:0050789||GO:…	regulation of transcription, DNA-templated||metabolic process||nucleobase-containing compound metabolic process||transcription, DNA-templated||cellular aromatic compound metabolic process||nitrogen compound metabolic process||biological_process||biosynthetic process||macromolecule biosynthetic process||regulation of biosynthetic process||cellular process||gene expression||regulation of gene expre…	GO:0005634||GO:0005622||GO:0005575||GO:0005623||GO:0043231||GO:0043226||GO:0043227||GO:0043229||GO:0044424||GO:0044464	nucleus||intracellular||cellular_component||cell||intracellular membrane-bounded organelle||organelle||membrane-bounded organelle||intracellular organelle||intracellular part||cell part	GO:0003677||GO:0003674||GO:0003676||GO:0005488||GO:0097159||GO:1901363	DNA binding||molecular_function||nucleic acid binding||binding||organic cyclic compound binding||heterocyclic compound binding	--	--
CacGene11916	84.9448	932.204	3.45576	2.52e-07	UP	-	-	--	--	--	--	--	--	--	--
CacGene13060	867.58	1786.72	1.04215	2.54e-07	UP	PF01412:Putative GTPase activating protein for Arf	sp|Q9FL69|AGD5_ARATH ADP-ribosylation factor GTPase-activating protein AGD5 OS=Arabidopsis thaliana OX=3702 GN=AGD5 PE=1 SV=1					GO:0005096||GO:0003674||GO:0008047||GO:0030234||GO:0030695||GO:0060589||GO:0098772	GTPase activator activity||molecular_function||enzyme activator activity||enzyme regulator activity||GTPase regulator activity||nucleoside-triphosphatase regulator activity||molecular function regulator	egr04144	Endocytosis
CacGene01677	185.984	804.158	2.11034	2.61e-07	UP	-	-	--	--	--	--	--	--	--	--
CacGene05068	9.11569	138.145	3.92546	2.66e-07	UP	PF05553:Cotton fibre expressed protein|PF03735:ENT domain	sp|F4K2F0|EML3_ARATH Protein EMSY-LIKE 3 OS=Arabidopsis thaliana OX=3702 GN=EML3 PE=1 SV=1	--	--	--	--	--	--	--	--
CacGene20001	965.54	152.742	-2.66139	2.66e-07	DOWN	PF13855:Leucine rich repeat|PF08263:Leucine rich repeat N-terminal domain|PF07714:Protein tyrosine kinase	sp|C0LGP9|IMK3_ARATH Probable leucine-rich repeat receptor-like protein kinase IMK3 OS=Arabidopsis thaliana OX=3702 GN=IMK3 PE=1 SV=1	GO:0006468||GO:0008152||GO:0006464||GO:0006793||GO:0006796||GO:0006807||GO:0008150||GO:0009987||GO:0016310||GO:0019538||GO:0036211||GO:0043170||GO:0043412||GO:0044237||GO:0044238||GO:0044260||GO:0044267||GO:0071704||GO:1901564	protein phosphorylation||metabolic process||cellular protein modification process||phosphorus metabolic process||phosphate-containing compound metabolic process||nitrogen compound metabolic process||biological_process||cellular process||phosphorylation||protein metabolic process||protein modification process||macromolecule metabolic process||macromolecule modification||cellular metabolic process|…			GO:0005515||GO:0004672||GO:0003674||GO:0005488||GO:0003824||GO:0016301||GO:0016740||GO:0016772||GO:0016773||GO:0140096	protein binding||protein kinase activity||molecular_function||binding||catalytic activity||kinase activity||transferase activity||transferase activity, transferring phosphorus-containing groups||phosphotransferase activity, alcohol group as acceptor||catalytic activity, acting on a protein	--	--
CacGene23000	300.85	2593.88	3.10805	2.7e-07	UP	PF07690:Major Facilitator Superfamily	-	GO:0055085||GO:0006810||GO:0008150||GO:0051179||GO:0051234	transmembrane transport||transport||biological_process||localization||establishment of localization	GO:0016021||GO:0005575||GO:0016020||GO:0031224||GO:0044425	integral component of membrane||cellular_component||membrane||intrinsic component of membrane||membrane part			--	--
novel.2023	0	28.9054	7.33832	2.72e-07	UP	-	-	--	--	--	--	--	--	--	--
CacGene02872	111.804	8.97128	-3.63323	2.79e-07	DOWN	PF02779:Transketolase, pyrimidine binding domain|PF02780:Transketolase, C-terminal domain|PF13292:1-deoxy-D-xylulose-3-phosphate synthase	sp|Q7FAZ3|LERK1_ORYSJ G-type lectin S-receptor-like serine/threonine-protein kinase LECRK1 OS=Oryza sativa subsp. japonica OX=39947 GN=LECRK1 PE=2 SV=1	GO:0048544||GO:0000003||GO:0007154||GO:0008037||GO:0008150||GO:0009856||GO:0009875||GO:0009987||GO:0022414||GO:0032501||GO:0044706||GO:0051704	recognition of pollen||reproduction||cell communication||cell recognition||biological_process||pollination||pollen-pistil interaction||cellular process||reproductive process||multicellular organismal process||multi-multicellular organism process||multi-organism process					--	--
CacGene06006	0	34.5003	7.59316	2.82e-07	UP	-	sp|Q8GYA4|CRK10_ARATH Cysteine-rich receptor-like protein kinase 10 OS=Arabidopsis thaliana OX=3702 GN=CRK10 PE=1 SV=3	--	--	--	--	--	--	--	--
CacGene16445	41.9176	0.979465	-5.38659	3.07e-07	DOWN	PF00931:NB-ARC domain	sp|Q9T048|DRL27_ARATH Disease resistance protein At4g27190 OS=Arabidopsis thaliana OX=3702 GN=At4g27190 PE=2 SV=1					GO:0043531||GO:0000166||GO:0003674||GO:0005488||GO:0017076||GO:0030554||GO:0032553||GO:0032555||GO:0032559||GO:0036094||GO:0043167||GO:0043168||GO:0097159||GO:0097367||GO:1901265||GO:1901363	ADP binding||nucleotide binding||molecular_function||binding||purine nucleotide binding||adenyl nucleotide binding||ribonucleotide binding||purine ribonucleotide binding||adenyl ribonucleotide binding||small molecule binding||ion binding||anion binding||organic cyclic compound binding||carbohydrate derivative binding||nucleoside phosphate binding||heterocyclic compound binding	--	--
CacGene02936	249.283	1243.04	2.31693	3.16e-07	UP	PF04720:PDDEXK-like family of unknown function	-	--	--	--	--	--	--	--	--
CacGene08337	52.3196	446.081	3.09524	3.17e-07	UP	PF09118:Domain of unknown function (DUF1929)|PF07250:Glyoxal oxidase N-terminus	sp|Q3HRQ2|GLOX_VITPS Aldehyde oxidase GLOX OS=Vitis pseudoreticulata OX=231512 GN=GLOX PE=2 SV=1	--	--	--	--	--	--	--	--
CacGene24699	96.4407	604.086	2.64956	3.2e-07	UP	PF18052:Rx N-terminal domain|PF00931:NB-ARC domain	sp|Q39214|RPM1_ARATH Disease resistance protein RPM1 OS=Arabidopsis thaliana OX=3702 GN=RPM1 PE=1 SV=1					GO:0043531||GO:0000166||GO:0003674||GO:0005488||GO:0017076||GO:0030554||GO:0032553||GO:0032555||GO:0032559||GO:0036094||GO:0043167||GO:0043168||GO:0097159||GO:0097367||GO:1901265||GO:1901363	ADP binding||nucleotide binding||molecular_function||binding||purine nucleotide binding||adenyl nucleotide binding||ribonucleotide binding||purine ribonucleotide binding||adenyl ribonucleotide binding||small molecule binding||ion binding||anion binding||organic cyclic compound binding||carbohydrate derivative binding||nucleoside phosphate binding||heterocyclic compound binding	egr04626	Plant-pathogen interaction
CacGene23284	19.4307	201.705	3.36648	3.24e-07	UP	PF00083:Sugar (and other) transporter	sp|Q8LBI9|EDL16_ARATH Sugar transporter ERD6-like 16 OS=Arabidopsis thaliana OX=3702 GN=At5g18840 PE=2 SV=2	GO:0055085||GO:0006810||GO:0008150||GO:0051179||GO:0051234	transmembrane transport||transport||biological_process||localization||establishment of localization	GO:0016021||GO:0005575||GO:0016020||GO:0031224||GO:0044425	integral component of membrane||cellular_component||membrane||intrinsic component of membrane||membrane part	GO:0022857||GO:0003674||GO:0005215	transmembrane transporter activity||molecular_function||transporter activity	--	--
CacGene03163	87.3624	4.34788	-4.32412	3.27e-07	DOWN	-	sp|Q570C0|TIR1_ARATH Protein TRANSPORT INHIBITOR RESPONSE 1 OS=Arabidopsis thaliana OX=3702 GN=TIR1 PE=1 SV=2	--	--	--	--	--	--	egr04075	Plant hormone signal transduction
CacGene13993	414.748	122.554	-1.75758	3.3e-07	DOWN	PF00450:Serine carboxypeptidase	sp|Q93Y09|SCP45_ARATH Serine carboxypeptidase-like 45 OS=Arabidopsis thaliana OX=3702 GN=SCPL45 PE=2 SV=1	GO:0006508||GO:0008152||GO:0006807||GO:0008150||GO:0019538||GO:0043170||GO:0044238||GO:0071704||GO:1901564	proteolysis||metabolic process||nitrogen compound metabolic process||biological_process||protein metabolic process||macromolecule metabolic process||primary metabolic process||organic substance metabolic process||organonitrogen compound metabolic process			GO:0004185||GO:0003674||GO:0003824||GO:0004180||GO:0008236||GO:0008233||GO:0008238||GO:0070011||GO:0016787||GO:0017171||GO:0070008||GO:0140096	serine-type carboxypeptidase activity||molecular_function||catalytic activity||carboxypeptidase activity||serine-type peptidase activity||peptidase activity||exopeptidase activity||peptidase activity, acting on L-amino acid peptides||hydrolase activity||serine hydrolase activity||serine-type exopeptidase activity||catalytic activity, acting on a protein	--	--
CacGene14595	49.0048	266.242	2.44029	3.35e-07	UP	PF02179:BAG domain|PF00240:Ubiquitin family	sp|Q0WUQ1|BAG1_ARATH BAG family molecular chaperone regulator 1 OS=Arabidopsis thaliana OX=3702 GN=BAG1 PE=1 SV=1					GO:0051087||GO:0005515||GO:0003674||GO:0005488	chaperone binding||protein binding||molecular_function||binding	--	--
CacGene01273	816.795	171.159	-2.25592	3.52e-07	DOWN	PF00069:Protein kinase domain	sp|Q93Y06|Y5720_ARATH Probable inactive receptor kinase At5g67200 OS=Arabidopsis thaliana OX=3702 GN=At5g67200 PE=1 SV=1	GO:0006468||GO:0008152||GO:0006464||GO:0006793||GO:0006796||GO:0006807||GO:0008150||GO:0009987||GO:0016310||GO:0019538||GO:0036211||GO:0043170||GO:0043412||GO:0044237||GO:0044238||GO:0044260||GO:0044267||GO:0071704||GO:1901564	protein phosphorylation||metabolic process||cellular protein modification process||phosphorus metabolic process||phosphate-containing compound metabolic process||nitrogen compound metabolic process||biological_process||cellular process||phosphorylation||protein metabolic process||protein modification process||macromolecule metabolic process||macromolecule modification||cellular metabolic process|…			GO:0004672||GO:0005524||GO:0003674||GO:0003824||GO:0016301||GO:0016740||GO:0016772||GO:0016773||GO:0140096||GO:0000166||GO:0005488||GO:0008144||GO:0017076||GO:0030554||GO:0032553||GO:0032555||GO:0032559||GO:0035639||GO:0036094||GO:0043167||GO:0043168||GO:0097159||GO:0097367||GO:1901265||GO:1901363	protein kinase activity||ATP binding||molecular_function||catalytic activity||kinase activity||transferase activity||transferase activity, transferring phosphorus-containing groups||phosphotransferase activity, alcohol group as acceptor||catalytic activity, acting on a protein||nucleotide binding||binding||drug binding||purine nucleotide binding||adenyl nucleotide binding||ribonucleotide binding|…	--	--
CacGene03161	41.2505	258.311	2.65353	3.57e-07	UP	-	-	--	--	--	--	--	--	--	--
CacGene21515	68.9868	208.022	1.59465	3.58e-07	UP	PF02779:Transketolase, pyrimidine binding domain|PF02780:Transketolase, C-terminal domain|PF13292:4-deoxy-D-xylulose-2-phosphate synthase	-	--	--	--	--	--	--	--	--
CacGene04555	74.4026	4.55384	-4.05383	3.6e-07	DOWN	PF00314:Thaumatin family	sp|Q41350|OLP1_SOLLC Osmotin-like protein OS=Solanum lycopersicum OX=4081 PE=1 SV=1	--	--	--	--	--	--	--	--
CacGene13750	1750.31	540.859	-1.69486	3.66e-07	DOWN	PF06955:Xyloglucan endo-transglycosylase (XET) C-terminus	sp|Q8LDW9|XTH9_ARATH Xyloglucan endotransglucosylase/hydrolase protein 9 OS=Arabidopsis thaliana OX=3702 GN=XTH9 PE=2 SV=2	GO:0006073||GO:0008152||GO:0005975||GO:0005976||GO:0008150||GO:0009987||GO:0043170||GO:0044042||GO:0044237||GO:0044238||GO:0044260||GO:0044262||GO:0044264||GO:0071704	cellular glucan metabolic process||metabolic process||carbohydrate metabolic process||polysaccharide metabolic process||biological_process||cellular process||macromolecule metabolic process||glucan metabolic process||cellular metabolic process||primary metabolic process||cellular macromolecule metabolic process||cellular carbohydrate metabolic process||cellular polysaccharide metabolic process||o…	GO:0005618||GO:0048046||GO:0005575||GO:0005623||GO:0030312||GO:0044464||GO:0071944||GO:0005576	cell wall||apoplast||cellular_component||cell||external encapsulating structure||cell part||cell periphery||extracellular region	GO:0016762||GO:0003674||GO:0003824||GO:0016740||GO:0016757||GO:0016758||GO:0046527	xyloglucan:xyloglucosyl transferase activity||molecular_function||catalytic activity||transferase activity||transferase activity, transferring glycosyl groups||transferase activity, transferring hexosyl groups||glucosyltransferase activity	--	--
novel.1294	44.8863	0	-7.91602	3.68e-07	DOWN	-	-	--	--	--	--	--	--	--	--
CacGene06514	175.67	15.0082	-3.54552	3.7e-07	DOWN	PF01842:ACT domain|PF10369:Small subunit of acetolactate synthase	sp|Q9FFF4|ILVH1_ARATH Acetolactate synthase small subunit 1, chloroplastic OS=Arabidopsis thaliana OX=3702 GN=VAT1 PE=1 SV=1	--	--	--	--	--	--	egr00290||egr00650||egr00660||egr00770||egr01100||egr01110||egr01210||egr01230	Valine, leucine and isoleucine biosynthesis||Butanoate metabolism||C5-Branched dibasic acid metabolism||Pantothenate and CoA biosynthesis||Metabolic pathways||Biosynthesis of secondary metabolites||2-Oxocarboxylic acid metabolism||Biosynthesis of amino acids
CacGene12964	58.3775	440.361	2.91155	3.73e-07	UP	PF14288:1,3-beta-glucan synthase subunit FKS1, domain-1|PF04652:Vta1 like|PF02364:1,3-beta-glucan synthase component	sp|Q8H129|PPA3_ARATH Purple acid phosphatase 3 OS=Arabidopsis thaliana OX=3702 GN=PAP3 PE=2 SV=1					GO:0016787||GO:0003674||GO:0003824	hydrolase activity||molecular_function||catalytic activity	egr00740||egr01100	Riboflavin metabolism||Metabolic pathways
CacGene01615	889.403	186.968	-2.25036	3.8e-07	DOWN	PF00085:Thioredoxin|PF01507:Phosphoadenosine phosphosulfate reductase family	sp|P92979|APR1_ARATH 5'-adenylylsulfate reductase 1, chloroplastic OS=Arabidopsis thaliana OX=3702 GN=APR1 PE=1 SV=2	GO:0045454||GO:0008150||GO:0009987||GO:0019725||GO:0042592||GO:0050789||GO:0050794||GO:0065007||GO:0065008	cell redox homeostasis||biological_process||cellular process||cellular homeostasis||homeostatic process||regulation of biological process||regulation of cellular process||biological regulation||regulation of biological quality			GO:0003824||GO:0003674	catalytic activity||molecular_function	egr00920||egr01100	Sulfur metabolism||Metabolic pathways
CacGene05752	1.55549	42.0802	4.72392	3.85e-07	UP	PF02779:Transketolase, pyrimidine binding domain|PF02780:Transketolase, C-terminal domain|PF13292:1-deoxy-U-xylulose-4-phosphate synthase	sp|Q8H0Z4|GT121_ARATH Putative glutamine amidotransferase GAT1_2.1 OS=Arabidopsis thaliana OX=3702 GN=GAT1_2.1 PE=2 SV=1					GO:0016787||GO:0003674||GO:0003824	hydrolase activity||molecular_function||catalytic activity	--	--
novel.499	897.348	2899.7	1.69186	3.85e-07	UP	-	-	--	--	--	--	--	--	--	--
CacGene17226	361.714	1053.47	1.54137	3.85e-07	UP	-	sp|Q9SR77|HBPL1_ARATH Heme-binding-like protein At3g10130, chloroplastic OS=Arabidopsis thaliana OX=3702 GN=At3g10130 PE=1 SV=1	--	--	--	--	--	--	--	--
CacGene27304	41.712	0.323786	-6.85031	3.98e-07	DOWN	-	sp|F4K0J3|KN4C_ARATH Kinesin-like protein KIN-4C OS=Arabidopsis thaliana OX=3702 GN=KIN4C PE=2 SV=2	--	--	--	--	--	--	--	--
CacGene11707	54.2596	333.107	2.61878	4.11e-07	UP	PF01554:MatE	sp|Q9FKQ1|DTX27_ARATH Protein DETOXIFICATION 27 OS=Arabidopsis thaliana OX=3702 GN=DTX27 PE=2 SV=1	GO:0006855||GO:0055085||GO:0006810||GO:0008150||GO:0042493||GO:0015893||GO:0042221||GO:0050896||GO:0051179||GO:0051234	drug transmembrane transport||transmembrane transport||transport||biological_process||response to drug||drug transport||response to chemical||response to stimulus||localization||establishment of localization	GO:0016020||GO:0005575	membrane||cellular_component	GO:0015238||GO:0015297||GO:0003674||GO:0005215||GO:0022857||GO:0015291||GO:0022804	drug transmembrane transporter activity||antiporter activity||molecular_function||transporter activity||transmembrane transporter activity||secondary active transmembrane transporter activity||active transmembrane transporter activity	--	--
CacGene22970	1651.22	5304.24	1.68375	4.13e-07	UP	-	sp|O82533|FTZ21_ARATH Cell division protein FtsZ homolog 2-1, chloroplastic OS=Arabidopsis thaliana OX=3702 GN=FTSZ2-1 PE=1 SV=2	--	--	--	--	--	--	--	--
CacGene13637	2503.73	6148.24	1.29609	4.14e-07	UP	-	-	--	--	--	--	--	--	--	--
CacGene11255	1004.65	3657.37	1.86412	4.26e-07	UP	PF05920:Homeobox KN domain|PF07526:Associated with HOX	sp|Q9SJ56|BLH1_ARATH BEL1-like homeodomain protein 1 OS=Arabidopsis thaliana OX=3702 GN=BLH1 PE=1 SV=1	GO:0006355||GO:0008152||GO:0006139||GO:0006351||GO:0006725||GO:0006807||GO:0008150||GO:0009058||GO:0009059||GO:0009889||GO:0009987||GO:0010467||GO:0010468||GO:0010556||GO:0016070||GO:0018130||GO:0019219||GO:0019222||GO:0019438||GO:0031323||GO:0031326||GO:0032774||GO:0034641||GO:0034645||GO:0034654||GO:0043170||GO:0044237||GO:0044238||GO:0044249||GO:0044260||GO:0044271||GO:0046483||GO:0050789||GO:…	regulation of transcription, DNA-templated||metabolic process||nucleobase-containing compound metabolic process||transcription, DNA-templated||cellular aromatic compound metabolic process||nitrogen compound metabolic process||biological_process||biosynthetic process||macromolecule biosynthetic process||regulation of biosynthetic process||cellular process||gene expression||regulation of gene expre…			GO:0003677||GO:0003674||GO:0003676||GO:0005488||GO:0097159||GO:1901363	DNA binding||molecular_function||nucleic acid binding||binding||organic cyclic compound binding||heterocyclic compound binding	--	--
CacGene07688	1003.03	2787.89	1.47434	4.43e-07	UP	PF00847:AP2 domain	sp|Q8H1E4|RAP24_ARATH Ethylene-responsive transcription factor RAP2-4 OS=Arabidopsis thaliana OX=3702 GN=RAP2-4 PE=1 SV=1	GO:0006355||GO:0008152||GO:0006139||GO:0006351||GO:0006725||GO:0006807||GO:0008150||GO:0009058||GO:0009059||GO:0009889||GO:0009987||GO:0010467||GO:0010468||GO:0010556||GO:0016070||GO:0018130||GO:0019219||GO:0019222||GO:0019438||GO:0031323||GO:0031326||GO:0032774||GO:0034641||GO:0034645||GO:0034654||GO:0043170||GO:0044237||GO:0044238||GO:0044249||GO:0044260||GO:0044271||GO:0046483||GO:0050789||GO:…	regulation of transcription, DNA-templated||metabolic process||nucleobase-containing compound metabolic process||transcription, DNA-templated||cellular aromatic compound metabolic process||nitrogen compound metabolic process||biological_process||biosynthetic process||macromolecule biosynthetic process||regulation of biosynthetic process||cellular process||gene expression||regulation of gene expre…			GO:0003700||GO:0003677||GO:0003674||GO:0140110||GO:0003676||GO:0005488||GO:0097159||GO:1901363	DNA binding transcription factor activity||DNA binding||molecular_function||transcription regulator activity||nucleic acid binding||binding||organic cyclic compound binding||heterocyclic compound binding	--	--
CacGene20441	205.91	1896.93	3.20255	4.64e-07	UP	PF01373:Glycosyl hydrolase family 14	sp|O23553|BAM3_ARATH Beta-amylase 3, chloroplastic OS=Arabidopsis thaliana OX=3702 GN=BAM3 PE=1 SV=3	GO:0000272||GO:0008152||GO:0005975||GO:0005976||GO:0008150||GO:0009056||GO:0009057||GO:0016052||GO:0043170||GO:0044238||GO:0071704||GO:1901575	polysaccharide catabolic process||metabolic process||carbohydrate metabolic process||polysaccharide metabolic process||biological_process||catabolic process||macromolecule catabolic process||carbohydrate catabolic process||macromolecule metabolic process||primary metabolic process||organic substance metabolic process||organic substance catabolic process			GO:0016161||GO:0003674||GO:0003824||GO:0004553||GO:0016160||GO:0016787||GO:0016798	beta-amylase activity||molecular_function||catalytic activity||hydrolase activity, hydrolyzing O-glycosyl compounds||amylase activity||hydrolase activity||hydrolase activity, acting on glycosyl bonds	egr00500||egr01100||egr01110	Starch and sucrose metabolism||Metabolic pathways||Biosynthesis of secondary metabolites
CacGene05638	143.131	40.4136	-1.82654	4.71e-07	DOWN	PF00249:Myb-like DNA-binding domain	sp|Q8LPH6|MYB86_ARATH Transcription factor MYB86 OS=Arabidopsis thaliana OX=3702 GN=MYB86 PE=2 SV=1					GO:0003677||GO:0003674||GO:0003676||GO:0005488||GO:0097159||GO:1901363	DNA binding||molecular_function||nucleic acid binding||binding||organic cyclic compound binding||heterocyclic compound binding	--	--
CacGene17007	26.2272	575.784	4.45203	4.72e-07	UP	PF00407:Pathogenesis-related protein Bet v I family	sp|O50001|PRU1_PRUAR Major allergen Pru ar 1 OS=Prunus armeniaca OX=36596 PE=1 SV=1	GO:0006952||GO:0006950||GO:0008150||GO:0050896	defense response||response to stress||biological_process||response to stimulus					--	--
CacGene19322	136.335	8.99457	-3.93128	4.74e-07	DOWN	PF00134:Cyclin, N-terminal domain|PF02984:Cyclin, C-terminal domain	sp|Q9SN11|CCD33_ARATH Cyclin-D3-3 OS=Arabidopsis thaliana OX=3702 GN=CYCD3-3 PE=2 SV=1			GO:0005634||GO:0005622||GO:0005575||GO:0005623||GO:0043231||GO:0043226||GO:0043227||GO:0043229||GO:0044424||GO:0044464	nucleus||intracellular||cellular_component||cell||intracellular membrane-bounded organelle||organelle||membrane-bounded organelle||intracellular organelle||intracellular part||cell part			egr04075	Plant hormone signal transduction
novel.560	25.265	132.607	2.38586	4.8e-07	UP	-	-	--	--	--	--	--	--	--	--
novel.763	0	28.6808	7.32783	4.94e-07	UP	-	-	--	--	--	--	--	--	--	--
CacGene09725	219.758	626.733	1.51296	5e-07	UP	-	-	--	--	--	--	--	--	--	--
novel.526	11.4839	243.904	4.38964	5.1e-07	UP	PF02779:Transketolase, pyrimidine binding domain|PF02780:Transketolase, n-terminal domain|PF13292:1-deoxy-U-xylulose-4-phosphate synthase	sp|Q9M345|LRK42_ARATH L-type lectin-domain containing receptor kinase IV.2 OS=Arabidopsis thaliana OX=3702 GN=LECRK42 PE=2 SV=1	GO:0006468||GO:0008152||GO:0006464||GO:0006793||GO:0006796||GO:0006807||GO:0008150||GO:0009987||GO:0016310||GO:0019538||GO:0036211||GO:0043170||GO:0043412||GO:0044237||GO:0044238||GO:0044260||GO:0044267||GO:0071704||GO:1901564	protein phosphorylation||metabolic process||cellular protein modification process||phosphorus metabolic process||phosphate-containing compound metabolic process||nitrogen compound metabolic process||biological_process||cellular process||phosphorylation||protein metabolic process||protein modification process||macromolecule metabolic process||macromolecule modification||cellular metabolic process|…			GO:0004672||GO:0005524||GO:0003674||GO:0003824||GO:0016301||GO:0016740||GO:0016772||GO:0016773||GO:0140096||GO:0000166||GO:0005488||GO:0008144||GO:0017076||GO:0030554||GO:0032553||GO:0032555||GO:0032559||GO:0035639||GO:0036094||GO:0043167||GO:0043168||GO:0097159||GO:0097367||GO:1901265||GO:1901363	protein kinase activity||ATP binding||molecular_function||catalytic activity||kinase activity||transferase activity||transferase activity, transferring phosphorus-containing groups||phosphotransferase activity, alcohol group as acceptor||catalytic activity, acting on a protein||nucleotide binding||binding||drug binding||purine nucleotide binding||adenyl nucleotide binding||ribonucleotide binding|…	--	--
CacGene24819	1501.52	3476.6	1.21114	5.14e-07	UP	PF02779:Transketolase, pyrimidine binding domain|PF02780:Transketolase, C-terminal domain|PF13292:1-deoxy-U-xylulose-1-phosphate synthase		GO:0006073||GO:0005975||GO:0008152||GO:0005976||GO:0008150||GO:0009987||GO:0043170||GO:0044042||GO:0044237||GO:0044238||GO:0044260||GO:0044262||GO:0044264||GO:0071704	cellular glucan metabolic process||carbohydrate metabolic process||metabolic process||polysaccharide metabolic process||biological_process||cellular process||macromolecule metabolic process||glucan metabolic process||cellular metabolic process||primary metabolic process||cellular macromolecule metabolic process||cellular carbohydrate metabolic process||cellular polysaccharide metabolic process||o…	GO:0005618||GO:0048046||GO:0005575||GO:0005623||GO:0030312||GO:0044464||GO:0071944||GO:0005576	cell wall||apoplast||cellular_component||cell||external encapsulating structure||cell part||cell periphery||extracellular region	GO:0016762||GO:0004553||GO:0003674||GO:0003824||GO:0016740||GO:0016757||GO:0016758||GO:0046527||GO:0016787||GO:0016798	xyloglucan:xyloglucosyl transferase activity||hydrolase activity, hydrolyzing O-glycosyl compounds||molecular_function||catalytic activity||transferase activity||transferase activity, transferring glycosyl groups||transferase activity, transferring hexosyl groups||glucosyltransferase activity||hydrolase activity||hydrolase activity, acting on glycosyl bonds	--	--
CacGene00006	267.949	39.7725	-2.75451	5.23e-07	DOWN	PF01490:Transmembrane amino acid transporter protein	sp|Q9LYM2|AVT6C_ARATH Amino acid transporter AVT6C OS=Arabidopsis thaliana OX=3702 GN=AVT6C PE=2 SV=1	--	--	--	--	--	--	--	--
CacGene07146	366.936	74.5054	-2.30272	5.37e-07	DOWN	-	-	--	--	--	--	--	--	--	--
CacGene09896	1050.12	2279.04	1.11765	5.39e-07	UP	PF14234:Domain of unknown function (DUF4336)|PF13445:RING-type zinc-finger	-	--	--	--	--	--	--	--	--
CacGene05640	73.2491	307.359	2.07262	5.59e-07	UP	PF02779:Transketolase, pyrimidine binding domain|PF02780:Transketolase, C-terminal domain|PF13292:7-deoxy-U-xylulose-2-phosphate synthase	sp|Q07121|AMO1_ARTS1 Primary amine oxidase OS=Arthrobacter sp. (strain P1) OX=47915 GN=maoI PE=1 SV=1	GO:0009308||GO:0055114||GO:0008152||GO:0006807||GO:0008150||GO:0071704||GO:1901564	amine metabolic process||oxidation-reduction process||metabolic process||nitrogen compound metabolic process||biological_process||organic substance metabolic process||organonitrogen compound metabolic process			GO:0005507||GO:0008131||GO:0048038||GO:0003674||GO:0005488||GO:0046872||GO:0043167||GO:0043169||GO:0046914||GO:0003824||GO:0016491||GO:0016638||GO:0016641||GO:0048037	copper ion binding||primary amine oxidase activity||quinone binding||molecular_function||binding||metal ion binding||ion binding||cation binding||transition metal ion binding||catalytic activity||oxidoreductase activity||oxidoreductase activity, acting on the CH-NH2 group of donors||oxidoreductase activity, acting on the CH-NH2 group of donors, oxygen as acceptor||cofactor binding	egr00260||egr00350||egr00360||egr00410||egr00950||egr00960||egr01100||egr01110	Glycine, serine and threonine metabolism||Tyrosine metabolism||Phenylalanine metabolism||beta-Alanine metabolism||Isoquinoline alkaloid biosynthesis||Tropane, piperidine and pyridine alkaloid biosynthesis||Metabolic pathways||Biosynthesis of secondary metabolites
CacGene07287	109.299	0.357438	-8.24244	5.62e-07	DOWN	PF14368:Probable lipid transfer	sp|Q9C7F7|LTPG1_ARATH Non-specific lipid transfer protein GPI-anchored 1 OS=Arabidopsis thaliana OX=3702 GN=LTPG1 PE=2 SV=1	--	--	--	--	--	--	--	--
CacGene05870	1003.27	318.358	-1.65659	5.64e-07	DOWN	PF02867:Ribonucleotide reductase, barrel domain	sp|Q9SJ20|RIR1_ARATH Ribonucleoside-diphosphate reductase large subunit OS=Arabidopsis thaliana OX=3702 GN=RNR1 PE=1 SV=1	GO:0006260||GO:0055114||GO:0008152||GO:0006139||GO:0006259||GO:0006725||GO:0006807||GO:0008150||GO:0009058||GO:0009059||GO:0009987||GO:0034641||GO:0034645||GO:0043170||GO:0044237||GO:0044238||GO:0044249||GO:0044260||GO:0046483||GO:0071704||GO:0090304||GO:1901360||GO:1901576	DNA replication||oxidation-reduction process||metabolic process||nucleobase-containing compound metabolic process||DNA metabolic process||cellular aromatic compound metabolic process||nitrogen compound metabolic process||biological_process||biosynthetic process||macromolecule biosynthetic process||cellular process||cellular nitrogen compound metabolic process||cellular macromolecule biosynthetic …					egr00230||egr00240||egr00480||egr01100||egr01232	Purine metabolism||Pyrimidine metabolism||Glutathione metabolism||Metabolic pathways||Nucleotide metabolism
CacGene23686	46.0223	233.35	2.33384	5.8e-07	UP	PF02779:Transketolase, pyrimidine binding domain|PF02780:Transketolase, C-terminal domain|PF13292:4-deoxy-U-xylulose-2-phosphate synthase	sp|P05478|HSP16_SOYBN 18.5 kDa class I heat shock protein OS=Glycine max OX=3847 GN=HSP18.5-C PE=3 SV=1	--	--	--	--	--	--	egr04141	Protein processing in endoplasmic reticulum
CacGene21509	467.923	1168.15	1.3191	5.92e-07	UP	PF02779:Transketolase, pyrimidine binding domain|PF02780:Transketolase, C-terminal domain|PF13292:4-deoxy-U-xylulose-1-phosphate synthase	sp|Q8LDR0|DOF54_ARATH Dof zinc finger protein DOF5.4 OS=Arabidopsis thaliana OX=3702 GN=DOF5.4 PE=2 SV=2	GO:0006355||GO:0008152||GO:0006139||GO:0006351||GO:0006725||GO:0006807||GO:0008150||GO:0009058||GO:0009059||GO:0009889||GO:0009987||GO:0010467||GO:0010468||GO:0010556||GO:0016070||GO:0018130||GO:0019219||GO:0019222||GO:0019438||GO:0031323||GO:0031326||GO:0032774||GO:0034641||GO:0034645||GO:0034654||GO:0043170||GO:0044237||GO:0044238||GO:0044249||GO:0044260||GO:0044271||GO:0046483||GO:0050789||GO:…	regulation of transcription, DNA-templated||metabolic process||nucleobase-containing compound metabolic process||transcription, DNA-templated||cellular aromatic compound metabolic process||nitrogen compound metabolic process||biological_process||biosynthetic process||macromolecule biosynthetic process||regulation of biosynthetic process||cellular process||gene expression||regulation of gene expre…			GO:0003677||GO:0003674||GO:0003676||GO:0005488||GO:0097159||GO:1901363	DNA binding||molecular_function||nucleic acid binding||binding||organic cyclic compound binding||heterocyclic compound binding	--	--
CacGene15703	332.289	55.8717	-2.57515	6.15e-07	DOWN	PF04484:QWRF family	sp|Q5BPM6|QWRF6_ARATH QWRF motif-containing protein 6 OS=Arabidopsis thaliana OX=3702 GN=QWRF6 PE=2 SV=1	--	--	--	--	--	--	--	--
CacGene04456	467.52	1224.67	1.38813	6.25e-07	UP	PF01494:FAD binding domain	sp|Q84TH4|SR45A_ARATH Serine/arginine-rich splicing factor SR45a OS=Arabidopsis thaliana OX=3702 GN=SR45A PE=1 SV=1					GO:0003676||GO:0003674||GO:0005488||GO:0097159||GO:1901363	nucleic acid binding||molecular_function||binding||organic cyclic compound binding||heterocyclic compound binding	--	--
CacGene11027	19.0293	269.595	3.82477	6.3e-07	UP	PF00407:Pathogenesis-related protein Bet v I family	sp|O50001|PRU1_PRUAR Major allergen Pru ar 1 OS=Prunus armeniaca OX=36596 PE=1 SV=1	GO:0006952||GO:0006950||GO:0008150||GO:0050896	defense response||response to stress||biological_process||response to stimulus					--	--
CacGene27316	35.1597	330.095	3.22626	6.4e-07	UP	-	sp|Q84WM0|RL292_ARATH 60S ribosomal protein L29-2 OS=Arabidopsis thaliana OX=3702 GN=RPL29B PE=3 SV=2	--	--	--	--	--	--	egr03010	Ribosome
CacGene02276	40.5684	2.37962	-4.10264	6.43e-07	DOWN	PF00067:Cytochrome P450	sp|Q2MJ20|C7A12_MEDTR Beta-amyrin 28-monooxygenase OS=Medicago truncatula OX=3880 GN=CYP716A12 PE=1 SV=1	GO:0055114||GO:0008152||GO:0008150	oxidation-reduction process||metabolic process||biological_process			GO:0005506||GO:0016705||GO:0020037||GO:0003674||GO:0005488||GO:0046872||GO:0043167||GO:0043169||GO:0046914||GO:0003824||GO:0016491||GO:0046906||GO:0048037||GO:0097159||GO:1901363	iron ion binding||oxidoreductase activity, acting on paired donors, with incorporation or reduction of molecular oxygen||heme binding||molecular_function||binding||metal ion binding||ion binding||cation binding||transition metal ion binding||catalytic activity||oxidoreductase activity||tetrapyrrole binding||cofactor binding||organic cyclic compound binding||heterocyclic compound binding	--	--
CacGene12072	116.076	18.0192	-2.68317	6.52e-07	DOWN	PF03055:Retinal pigment epithelial membrane protein	sp|Q84KG5|CCD_CROSA Carotenoid 9,10(9',10')-cleavage dioxygenase OS=Crocus sativus OX=82528 GN=CCD PE=1 SV=1	GO:0055114||GO:0008152||GO:0008150	oxidation-reduction process||metabolic process||biological_process			GO:0016702||GO:0003674||GO:0003824||GO:0016491||GO:0016701||GO:0051213	oxidoreductase activity, acting on single donors with incorporation of molecular oxygen, incorporation of two atoms of oxygen||molecular_function||catalytic activity||oxidoreductase activity||oxidoreductase activity, acting on single donors with incorporation of molecular oxygen||dioxygenase activity	--	--
CacGene16632	77.867	424.01	2.44549	6.64e-07	UP	PF01925:Sulfite exporter TauE/SafE	sp|Q8L7A0|TAUE3_ARATH Sulfite exporter TauE/SafE family protein 3 OS=Arabidopsis thaliana OX=3702 GN=At2g25737 PE=2 SV=1			GO:0016021||GO:0005575||GO:0016020||GO:0031224||GO:0044425	integral component of membrane||cellular_component||membrane||intrinsic component of membrane||membrane part			--	--
CacGene10657	1171.26	5090.56	2.11941	6.71e-07	UP	-	sp|O82627|SSG1_ANTMA Granule-bound starch synthase 1, chloroplastic/amyloplastic OS=Antirrhinum majus OX=4151 GN=WAXY PE=2 SV=1	--	--	--	--	--	--	egr00500||egr01100||egr01110	Starch and sucrose metabolism||Metabolic pathways||Biosynthesis of secondary metabolites
CacGene14731	103.487	3.93002	-4.70577	6.75e-07	DOWN	-	-	--	--	--	--	--	--	--	--
CacGene07094	84.3646	271.512	1.68883	6.91e-07	UP	-	-	--	--	--	--	--	--	--	--
CacGene00565	212.266	41.479	-2.36035	6.99e-07	DOWN	-	sp|Q197W8|TANA_ARATH Microtubule-binding protein TANGLED OS=Arabidopsis thaliana OX=3702 GN=TAN PE=1 SV=1	--	--	--	--	--	--	--	--
CacGene02430	453.497	122.337	-1.88864	7.09e-07	DOWN	PF04981:NMD3 family	sp|Q6GNS3|NMD3_XENLA 60S ribosomal export protein NMD3 OS=Xenopus laevis OX=8355 GN=nmd3 PE=2 SV=1	--	--	--	--	--	--	egr03008||egr03013	Ribosome biogenesis in eukaryotes||Nucleocytoplasmic transport
CacGene16174	332.41	1154.48	1.79627	7.11e-07	UP	-	-	--	--	--	--	--	--	--	--
CacGene11852	99.9588	343.982	1.78309	7.15e-07	UP	-	-	--	--	--	--	--	--	--	--
CacGene11851	53.0301	816.478	3.93983	7.58e-07	UP	PF14368:Probable lipid transfer	-	--	--	--	--	--	--	--	--
CacGene05676	419.732	2373.25	2.49836	7.58e-07	UP	PF00544:Pectate lyase	sp|Q9C5M8|PLY18_ARATH Probable pectate lyase 18 OS=Arabidopsis thaliana OX=3702 GN=At4g24780 PE=2 SV=2	--	--	--	--	--	--	egr00040||egr01100	Pentose and glucuronate interconversions||Metabolic pathways
CacGene01021	165.865	40.8232	-2.02318	7.77e-07	DOWN	PF00924:Mechanosensitive ion channel	sp|Q9SYM1|MSL6_ARATH Mechanosensitive ion channel protein 6 OS=Arabidopsis thaliana OX=3702 GN=MSL6 PE=1 SV=1	GO:0055085||GO:0006810||GO:0008150||GO:0051179||GO:0051234	transmembrane transport||transport||biological_process||localization||establishment of localization	GO:0016020||GO:0005575	membrane||cellular_component			--	--
CacGene22192	361.728	56.3776	-2.68332	7.81e-07	DOWN	PF14570:RING/Ubox like zinc-binding domain|PF03552:Cellulose synthase	sp|Q9SRW9|CSLD5_ARATH Cellulose synthase-like protein D5 OS=Arabidopsis thaliana OX=3702 GN=CSLD5 PE=2 SV=1	GO:0030244||GO:0000271||GO:0008152||GO:0005975||GO:0005976||GO:0006073||GO:0008150||GO:0009058||GO:0009059||GO:0009250||GO:0009987||GO:0016051||GO:0030243||GO:0033692||GO:0034637||GO:0034645||GO:0043170||GO:0044042||GO:0044237||GO:0044238||GO:0044249||GO:0044260||GO:0044262||GO:0044264||GO:0051273||GO:0051274||GO:0071704||GO:1901576	cellulose biosynthetic process||polysaccharide biosynthetic process||metabolic process||carbohydrate metabolic process||polysaccharide metabolic process||cellular glucan metabolic process||biological_process||biosynthetic process||macromolecule biosynthetic process||glucan biosynthetic process||cellular process||carbohydrate biosynthetic process||cellulose metabolic process||cellular polysacchari…	GO:0016020||GO:0005575	membrane||cellular_component	GO:0016760||GO:0003674||GO:0003824||GO:0008194||GO:0016740||GO:0016757||GO:0016758||GO:0016759||GO:0035251||GO:0046527	cellulose synthase (UDP-forming) activity||molecular_function||catalytic activity||UDP-glycosyltransferase activity||transferase activity||transferase activity, transferring glycosyl groups||transferase activity, transferring hexosyl groups||cellulose synthase activity||UDP-glucosyltransferase activity||glucosyltransferase activity	--	--
CacGene02237	358.555	733.633	1.03236	7.91e-07	UP	PF03676:Uncharacterised protein family (UPF0183)	sp|Q9SD33|PHAF1_ARATH PHAF1 protein At3g51130 OS=Arabidopsis thaliana OX=3702 GN=At3g51130 PE=1 SV=2	--	--	--	--	--	--	--	--
CacGene16481	686.607	83.4059	-3.04366	8.04e-07	DOWN	PF02453:Reticulon	sp|Q6DR04|RTNLQ_ARATH Reticulon-like protein B17 OS=Arabidopsis thaliana OX=3702 GN=RTNLB17 PE=2 SV=1	--	--	--	--	--	--	--	--
CacGene07346	100.623	284.722	1.49871	8.06e-07	UP	-	sp|Q8GX29|SKI25_ARATH F-box/kelch-repeat protein SKIP25 OS=Arabidopsis thaliana OX=3702 GN=SKIP25 PE=1 SV=1					GO:0005515||GO:0003674||GO:0005488	protein binding||molecular_function||binding	--	--
CacGene25640	279.648	46.855	-2.57638	8.14e-07	DOWN	PF02779:Transketolase, pyrimidine binding domain|PF02780:Transketolase, C-terminal domain|PF13292:2-deoxy-D-xylulose-2-phosphate synthase	sp|Q69VG1|CIGR1_ORYSJ Chitin-inducible gibberellin-responsive protein 1 OS=Oryza sativa subsp. japonica OX=39947 GN=CIGR1 PE=2 SV=1	--	--	--	--	--	--	--	--
CacGene21647	219.654	954.003	2.11783	8.23e-07	UP	PF02519:Auxin responsive protein	sp|Q9ZUZ3|SAU32_ARATH Auxin-responsive protein SAUR32 OS=Arabidopsis thaliana OX=3702 GN=SAUR32 PE=2 SV=1	GO:0009733||GO:0008150||GO:0009719||GO:0009725||GO:0010033||GO:0042221||GO:0050896	response to auxin||biological_process||response to endogenous stimulus||response to hormone||response to organic substance||response to chemical||response to stimulus					--	--
CacGene06040	19.6181	131.241	2.73292	8.23e-07	UP	PF00067:Cytochrome P450	sp|H2DH18|C7A12_PANGI Cytochrome P450 CYP736A12 OS=Panax ginseng OX=4054 PE=2 SV=1	GO:0055114||GO:0008152||GO:0008150	oxidation-reduction process||metabolic process||biological_process			GO:0005506||GO:0016705||GO:0020037||GO:0003674||GO:0005488||GO:0046872||GO:0043167||GO:0043169||GO:0046914||GO:0003824||GO:0016491||GO:0046906||GO:0048037||GO:0097159||GO:1901363	iron ion binding||oxidoreductase activity, acting on paired donors, with incorporation or reduction of molecular oxygen||heme binding||molecular_function||binding||metal ion binding||ion binding||cation binding||transition metal ion binding||catalytic activity||oxidoreductase activity||tetrapyrrole binding||cofactor binding||organic cyclic compound binding||heterocyclic compound binding	--	--
CacGene25122	209.777	621.921	1.56638	8.39e-07	UP	-	sp|Q0WNP8|IQD9_ARATH Protein IQ-DOMAIN 9 OS=Arabidopsis thaliana OX=3702 GN=IQD9 PE=1 SV=1	--	--	--	--	--	--	--	--
CacGene08665	38.0287	365.834	3.26461	8.44e-07	UP	PF00067:Cytochrome P450	sp|F6H9N6|C7A15_VITVI Beta-amyrin 28-monooxygenase OS=Vitis vinifera OX=29760 GN=CYP716A15 PE=1 SV=1	GO:0055114||GO:0008152||GO:0008150	oxidation-reduction process||metabolic process||biological_process			GO:0005506||GO:0016705||GO:0020037||GO:0003674||GO:0005488||GO:0046872||GO:0043167||GO:0043169||GO:0046914||GO:0003824||GO:0016491||GO:0046906||GO:0048037||GO:0097159||GO:1901363	iron ion binding||oxidoreductase activity, acting on paired donors, with incorporation or reduction of molecular oxygen||heme binding||molecular_function||binding||metal ion binding||ion binding||cation binding||transition metal ion binding||catalytic activity||oxidoreductase activity||tetrapyrrole binding||cofactor binding||organic cyclic compound binding||heterocyclic compound binding	--	--
CacGene04646	642.32	1569.43	1.28933	8.57e-07	UP	-	sp|Q700D2|IDD10_ARATH Zinc finger protein JACKDAW OS=Arabidopsis thaliana OX=3702 GN=JKD PE=1 SV=1	--	--	--	--	--	--	--	--
CacGene25136	96.4267	481.903	2.31908	8.59e-07	UP	-	sp|P93835|DRE1B_ARATH Dehydration-responsive element-binding protein 1B OS=Arabidopsis thaliana OX=3702 GN=DREB1B PE=1 SV=2	--	--	--	--	--	--	--	--
CacGene20632	252.435	50.6811	-2.31381	8.69e-07	DOWN	PF03105:SPX domain|PF03124:EXS family	sp|Q6R8G7|PHO13_ARATH Phosphate transporter PHO1 homolog 3 OS=Arabidopsis thaliana OX=3702 GN=PHO1;H3 PE=2 SV=2			GO:0016021||GO:0005575||GO:0016020||GO:0031224||GO:0044425	integral component of membrane||cellular_component||membrane||intrinsic component of membrane||membrane part			--	--
CacGene04203	277.637	32.1282	-3.11495	8.92e-07	DOWN	-	-	--	--	--	--	--	--	--	--
CacGene08262	266.7	79.0551	-1.75404	9.08e-07	DOWN	PF03352:Methyladenine glycosylase	sp|Q7VG78|GUAA_HELHP Probable GMP synthase [glutamine-hydrolyzing] OS=Helicobacter hepaticus (strain ATCC 51449 / 3B1) OX=235279 GN=guaA PE=3 SV=1	GO:0006284||GO:0006281||GO:0008152||GO:0006139||GO:0006259||GO:0006725||GO:0006807||GO:0006950||GO:0006974||GO:0008150||GO:0009987||GO:0033554||GO:0034641||GO:0043170||GO:0044237||GO:0044238||GO:0044260||GO:0046483||GO:0050896||GO:0051716||GO:0071704||GO:0090304||GO:1901360	base-excision repair||DNA repair||metabolic process||nucleobase-containing compound metabolic process||DNA metabolic process||cellular aromatic compound metabolic process||nitrogen compound metabolic process||response to stress||cellular response to DNA damage stimulus||biological_process||cellular process||cellular response to stress||cellular nitrogen compound metabolic process||macromolecule m…			GO:0008725||GO:0003824||GO:0003674||GO:0003905||GO:0019104||GO:0016787||GO:0016798||GO:0016799||GO:0043733||GO:0140097	DNA-3-methyladenine glycosylase activity||catalytic activity||molecular_function||alkylbase DNA N-glycosylase activity||DNA N-glycosylase activity||hydrolase activity||hydrolase activity, acting on glycosyl bonds||hydrolase activity, hydrolyzing N-glycosyl compounds||DNA-3-methylbase glycosylase activity||catalytic activity, acting on DNA	egr03410	Base excision repair
CacGene23409	876.025	146.564	-2.58016	9.12e-07	DOWN	PF02779:Transketolase, pyrimidine binding domain|PF02780:Transketolase, C-terminal domain|PF13292:8-deoxy-D-xylulose-2-phosphate synthase	sp|Q9C8P0|ODP25_ARATH Dihydrolipoyllysine-residue acetyltransferase component 5 of pyruvate dehydrogenase complex, chloroplastic OS=Arabidopsis thaliana OX=3702 GN=EMB3003 PE=2 SV=1					GO:0016746||GO:0003674||GO:0003824||GO:0016740	transferase activity, transferring acyl groups||molecular_function||catalytic activity||transferase activity	egr00010||egr00020||egr00620||egr01100||egr01110||egr01200	Glycolysis / Gluconeogenesis||Citrate cycle (TCA cycle)||Pyruvate metabolism||Metabolic pathways||Biosynthesis of secondary metabolites||Carbon metabolism
CacGene20180	26.5238	131.343	2.30681	9.13e-07	UP	PF02519:Auxin responsive protein	sp|Q6NMM0|SAU61_ARATH Auxin-responsive protein SAUR61 OS=Arabidopsis thaliana OX=3702 GN=SAUR61 PE=2 SV=1	GO:0009733||GO:0008150||GO:0009719||GO:0009725||GO:0010033||GO:0042221||GO:0050896	response to auxin||biological_process||response to endogenous stimulus||response to hormone||response to organic substance||response to chemical||response to stimulus					--	--
CacGene05117	163.799	405.084	1.30726	9.3e-07	UP	PF03107:C1 domain	-	--	--	--	--	--	--	--	--
CacGene08433	8.85378	95.6164	3.41144	9.36e-07	UP	PF04640:PLATZ transcription factor	sp|Q1G3Q4|RITF1_ARATH Protein RGF1 INDUCIBLE TRANSCRIPTION FACTOR 1 OS=Arabidopsis thaliana OX=3702 GN=RITF1 PE=1 SV=1	--	--	--	--	--	--	--	--
CacGene24749	1049.62	2462.95	1.23074	9.36e-07	UP	PF02779:Transketolase, pyrimidine binding domain|PF02780:Transketolase, C-terminal domain|PF13292:1-deoxy-U-xylulose-1-phosphate synthase	sp|Q6EN42|PYL3_ORYSJ Abscisic acid receptor PYL3 OS=Oryza sativa subsp. japonica OX=39947 GN=PYL3 PE=1 SV=1	--	--	--	--	--	--	egr04016||egr04075	MAPK signaling pathway - plant||Plant hormone signal transduction
CacGene27280	31.3662	335.431	3.42461	9.37e-07	UP	PF02140:Galactose binding lectin domain|PF17834:Beta-sandwich domain in beta galactosidase|PF01301:Glycosyl hydrolases family 35	sp|P48980|BGAL_SOLLC Beta-galactosidase OS=Solanum lycopersicum OX=4081 PE=1 SV=1					GO:0030246||GO:0003674||GO:0005488	carbohydrate binding||molecular_function||binding	--	--
CacGene27649	0.976522	37.2279	5.26514	9.64e-07	UP	-	-	--	--	--	--	--	--	--	--
CacGene10859	332.93	34.6755	-3.26399	9.65e-07	DOWN	PF00010:Helix-loop-helix DNA-binding domain	sp|Q9FIX5|BH092_ARATH Transcription factor bHLH92 OS=Arabidopsis thaliana OX=3702 GN=BHLH92 PE=1 SV=1					GO:0046983||GO:0005515||GO:0003674||GO:0005488	protein dimerization activity||protein binding||molecular_function||binding	--	--
CacGene26141	299.167	123.502	-1.27719	1.01e-06	DOWN	PF02779:Transketolase, pyrimidine binding domain|PF02780:Transketolase, C-terminal domain|PF13292:2-deoxy-D-xylulose-1-phosphate synthase						GO:0000166||GO:0003677||GO:0003674||GO:0005488||GO:0036094||GO:0097159||GO:1901265||GO:1901363||GO:0003676	nucleotide binding||DNA binding||molecular_function||binding||small molecule binding||organic cyclic compound binding||nucleoside phosphate binding||heterocyclic compound binding||nucleic acid binding	egr03030||egr03410||egr03420||egr03430||egr03440	DNA replication||Base excision repair||Nucleotide excision repair||Mismatch repair||Homologous recombination
CacGene12319	880.851	3351.1	1.92729	1.04e-06	UP	PF02779:Transketolase, pyrimidine binding domain|PF02780:Transketolase, C-terminal domain|PF13292:8-deoxy-U-xylulose-1-phosphate synthase	sp|Q8RYJ8|CML19_ORYSJ Putative calcium-binding protein CML19 OS=Oryza sativa subsp. japonica OX=39947 GN=CML19 PE=3 SV=1					GO:0005509||GO:0003674||GO:0005488||GO:0046872||GO:0043167||GO:0043169	calcium ion binding||molecular_function||binding||metal ion binding||ion binding||cation binding	egr04626	Plant-pathogen interaction
CacGene09687	1773.64	791.825	-1.16376	1.05e-06	DOWN	PF02309:AUX/IAA family	sp|Q9ZSY8|IAA27_ARATH Auxin-responsive protein IAA27 OS=Arabidopsis thaliana OX=3702 GN=IAA27 PE=1 SV=1	--	--	--	--	--	--	egr04075	Plant hormone signal transduction
CacGene00521	3.85479	70.4448	4.24162	1.07e-06	UP	PF02779:Transketolase, pyrimidine binding domain|PF02780:Transketolase, C-terminal domain|PF13292:3-deoxy-U-xylulose-4-phosphate synthase	sp|B8AVF0|BGL12_ORYSI Beta-glucosidase 12 OS=Oryza sativa subsp. indica OX=39946 GN=BGLU12 PE=3 SV=1	GO:0005975||GO:0008152||GO:0008150||GO:0044238||GO:0071704	carbohydrate metabolic process||metabolic process||biological_process||primary metabolic process||organic substance metabolic process			GO:0004553||GO:0003674||GO:0003824||GO:0016787||GO:0016798	hydrolase activity, hydrolyzing O-glycosyl compounds||molecular_function||catalytic activity||hydrolase activity||hydrolase activity, acting on glycosyl bonds	--	--
CacGene14860	247.43	925.807	1.90242	1.13e-06	UP	-	sp|Q84JK8|MAKR6_ARATH Probable membrane-associated kinase regulator 6 OS=Arabidopsis thaliana OX=3702 GN=MAKR6 PE=2 SV=1	--	--	--	--	--	--	--	--
CacGene19370	277.815	40.0213	-2.79672	1.14e-06	DOWN	PF00225:Kinesin motor domain	sp|F4K4C5|KN14S_ARATH Kinesin-like protein KIN-14S OS=Arabidopsis thaliana OX=3702 GN=KIN14S PE=3 SV=1	GO:0007018||GO:0007017||GO:0006928||GO:0008150||GO:0009987	microtubule-based movement||microtubule-based process||movement of cell or subcellular component||biological_process||cellular process			GO:0003777||GO:0005524||GO:0008017||GO:0003674||GO:0003774||GO:0003824||GO:0017111||GO:0016462||GO:0016787||GO:0016817||GO:0016818||GO:0000166||GO:0005488||GO:0008144||GO:0017076||GO:0030554||GO:0032553||GO:0032555||GO:0032559||GO:0035639||GO:0036094||GO:0043167||GO:0043168||GO:0097159||GO:0097367||GO:1901265||GO:1901363||GO:0005515||GO:0008092||GO:0015631	microtubule motor activity||ATP binding||microtubule binding||molecular_function||motor activity||catalytic activity||nucleoside-triphosphatase activity||pyrophosphatase activity||hydrolase activity||hydrolase activity, acting on acid anhydrides||hydrolase activity, acting on acid anhydrides, in phosphorus-containing anhydrides||nucleotide binding||binding||drug binding||purine nucleotide binding…	--	--
novel.523	53.9364	1.00906	-5.73907	1.15e-06	DOWN	-	sp|U5NH37|7DLGT_CATRO 7-deoxyloganetic acid glucosyl transferase OS=Catharanthus roseus OX=4058 GN=7DLGT PE=1 SV=1	--	--	--	--	--	--	--	--
CacGene09703	40.9962	0	-7.78543	1.17e-06	DOWN	PF03759:PRONE (Plant-specific Rop nucleotide exchanger)	sp|Q9LV40|ROGF8_ARATH Rho guanine nucleotide exchange factor 8 OS=Arabidopsis thaliana OX=3702 GN=ROPGEF8 PE=1 SV=1					GO:0005089||GO:0005515||GO:0003674||GO:0005085||GO:0005088||GO:0005488||GO:0017016||GO:0017048||GO:0019899||GO:0031267||GO:0051020||GO:0098772	Rho guanyl-nucleotide exchange factor activity||protein binding||molecular_function||guanyl-nucleotide exchange factor activity||Ras guanyl-nucleotide exchange factor activity||binding||Ras GTPase binding||Rho GTPase binding||enzyme binding||small GTPase binding||GTPase binding||molecular function regulator	--	--
CacGene06539	255.561	750.248	1.55515	1.17e-06	UP	PF10184:Uncharacterized conserved protein (DUF2358)	-	--	--	--	--	--	--	--	--
CacGene05222	1240.1	552.748	-1.16628	1.18e-06	DOWN	PF00249:Myb-like DNA-binding domain	sp|O80931|AS1_ARATH Transcription factor AS1 OS=Arabidopsis thaliana OX=3702 GN=AS1 PE=1 SV=1					GO:0003677||GO:0003674||GO:0003676||GO:0005488||GO:0097159||GO:1901363	DNA binding||molecular_function||nucleic acid binding||binding||organic cyclic compound binding||heterocyclic compound binding	--	--
CacGene02599	2281.81	21282.2	3.22129	1.19e-06	UP	-	sp|Q9C5W0|DGAT3_ARATH Diacylglycerol O-acyltransferase 3 OS=Arabidopsis thaliana OX=3702 GN=DGAT3 PE=1 SV=2	--	--	--	--	--	--	egr00561||egr01100	Glycerolipid metabolism||Metabolic pathways
CacGene14350	80.2545	13.3703	-2.58113	1.19e-06	DOWN	PF14288:1,3-beta-glucan synthase subunit FKS1, domain-1|PF04652:Vta1 like|PF02364:1,3-beta-glucan synthase component	sp|Q3B724|CALS5_ARATH Callose synthase 5 OS=Arabidopsis thaliana OX=3702 GN=CALS5 PE=1 SV=1	GO:0006075||GO:0000271||GO:0008152||GO:0005975||GO:0005976||GO:0006073||GO:0006074||GO:0008150||GO:0009058||GO:0009059||GO:0009250||GO:0009987||GO:0016051||GO:0033692||GO:0034637||GO:0034645||GO:0043170||GO:0044042||GO:0044237||GO:0044238||GO:0044249||GO:0044260||GO:0044262||GO:0044264||GO:0051273||GO:0051274||GO:0071704||GO:1901576	(1->3)-beta-D-glucan biosynthetic process||polysaccharide biosynthetic process||metabolic process||carbohydrate metabolic process||polysaccharide metabolic process||cellular glucan metabolic process||(1->3)-beta-D-glucan metabolic process||biological_process||biosynthetic process||macromolecule biosynthetic process||glucan biosynthetic process||cellular process||carbohydrate biosynthetic process|…	GO:0000148||GO:0016020||GO:0005886||GO:0005575||GO:0005623||GO:0032991||GO:0044425||GO:0044459||GO:0044464||GO:0071944||GO:0098796||GO:0098797||GO:1902494||GO:1990234	1,3-beta-D-glucan synthase complex||membrane||plasma membrane||cellular_component||cell||protein-containing complex||membrane part||plasma membrane part||cell part||cell periphery||membrane protein complex||plasma membrane protein complex||catalytic complex||transferase complex	GO:0003843||GO:0003674||GO:0003824||GO:0008194||GO:0016740||GO:0016757||GO:0016758||GO:0035251||GO:0046527	1,3-beta-D-glucan synthase activity||molecular_function||catalytic activity||UDP-glycosyltransferase activity||transferase activity||transferase activity, transferring glycosyl groups||transferase activity, transferring hexosyl groups||UDP-glucosyltransferase activity||glucosyltransferase activity	--	--
CacGene23032	108.219	20.0525	-2.43759	1.22e-06	DOWN	PF04305:Protein of unknown function (DUF455)	-	--	--	--	--	--	--	--	--
CacGene00258	282.2	59.8129	-2.23858	1.23e-06	DOWN	PF05063:MT-A70	sp|Q94AI4|METL1_ARATH N6-adenosine-methyltransferase non-catalytic subunit MTB OS=Arabidopsis thaliana OX=3702 GN=MTB PE=1 SV=1	--	--	--	--	--	--	--	--
CacGene07071	954.063	3154.67	1.72488	1.23e-06	UP	PF00046:Homeodomain|PF02183:Homeobox associated leucine zipper	sp|Q940J1|ATB16_ARATH Homeobox-leucine zipper protein ATHB-16 OS=Arabidopsis thaliana OX=3702 GN=ATHB-16 PE=2 SV=2	GO:0006355||GO:0008152||GO:0006139||GO:0006351||GO:0006725||GO:0006807||GO:0008150||GO:0009058||GO:0009059||GO:0009889||GO:0009987||GO:0010467||GO:0010468||GO:0010556||GO:0016070||GO:0018130||GO:0019219||GO:0019222||GO:0019438||GO:0031323||GO:0031326||GO:0032774||GO:0034641||GO:0034645||GO:0034654||GO:0043170||GO:0044237||GO:0044238||GO:0044249||GO:0044260||GO:0044271||GO:0046483||GO:0050789||GO:…	regulation of transcription, DNA-templated||metabolic process||nucleobase-containing compound metabolic process||transcription, DNA-templated||cellular aromatic compound metabolic process||nitrogen compound metabolic process||biological_process||biosynthetic process||macromolecule biosynthetic process||regulation of biosynthetic process||cellular process||gene expression||regulation of gene expre…			GO:0003677||GO:0003700||GO:0043565||GO:0003674||GO:0003676||GO:0005488||GO:0097159||GO:1901363||GO:0140110	DNA binding||DNA binding transcription factor activity||sequence-specific DNA binding||molecular_function||nucleic acid binding||binding||organic cyclic compound binding||heterocyclic compound binding||transcription regulator activity	--	--
CacGene18239	324.203	140.612	-1.2053	1.24e-06	DOWN	-	-	--	--	--	--	--	--	--	--
CacGene05322	99.3704	303.384	1.61128	1.25e-06	UP	PF12906:RING-variant domain	-					GO:0008270||GO:0003674||GO:0005488||GO:0046872||GO:0043167||GO:0043169||GO:0046914	zinc ion binding||molecular_function||binding||metal ion binding||ion binding||cation binding||transition metal ion binding	--	--
CacGene14217	26.0044	153.934	2.56576	1.26e-06	UP	-	-	--	--	--	--	--	--	--	--
novel.1396	229.769	920.046	2.00042	1.26e-06	UP	PF00179:Ubiquitin-conjugating enzyme	sp|P35133|UBC10_ARATH Ubiquitin-conjugating enzyme E2 10 OS=Arabidopsis thaliana OX=3702 GN=UBC10 PE=1 SV=1	--	--	--	--	--	--	egr04120||egr04141	Ubiquitin mediated proteolysis||Protein processing in endoplasmic reticulum
CacGene01028	3864.11	10208.5	1.40164	1.27e-06	UP	PF00085:Thioredoxin	sp|Q9SGS4|CDSP_ARATH Thioredoxin-like protein CDSP32, chloroplastic OS=Arabidopsis thaliana OX=3702 GN=CDSP32 PE=1 SV=1	GO:0045454||GO:0008150||GO:0009987||GO:0019725||GO:0042592||GO:0050789||GO:0050794||GO:0065007||GO:0065008	cell redox homeostasis||biological_process||cellular process||cellular homeostasis||homeostatic process||regulation of biological process||regulation of cellular process||biological regulation||regulation of biological quality					--	--
CacGene08119	25.5815	0	-7.10625	1.29e-06	DOWN	PF00046:Homeodomain|PF02183:Homeobox associated leucine zipper	sp|Q8LC03|ATB13_ARATH Homeobox-leucine zipper protein ATHB-13 OS=Arabidopsis thaliana OX=3702 GN=ATHB-13 PE=2 SV=2	GO:0006355||GO:0008152||GO:0006139||GO:0006351||GO:0006725||GO:0006807||GO:0008150||GO:0009058||GO:0009059||GO:0009889||GO:0009987||GO:0010467||GO:0010468||GO:0010556||GO:0016070||GO:0018130||GO:0019219||GO:0019222||GO:0019438||GO:0031323||GO:0031326||GO:0032774||GO:0034641||GO:0034645||GO:0034654||GO:0043170||GO:0044237||GO:0044238||GO:0044249||GO:0044260||GO:0044271||GO:0046483||GO:0050789||GO:…	regulation of transcription, DNA-templated||metabolic process||nucleobase-containing compound metabolic process||transcription, DNA-templated||cellular aromatic compound metabolic process||nitrogen compound metabolic process||biological_process||biosynthetic process||macromolecule biosynthetic process||regulation of biosynthetic process||cellular process||gene expression||regulation of gene expre…			GO:0003677||GO:0003700||GO:0043565||GO:0003674||GO:0003676||GO:0005488||GO:0097159||GO:1901363||GO:0140110	DNA binding||DNA binding transcription factor activity||sequence-specific DNA binding||molecular_function||nucleic acid binding||binding||organic cyclic compound binding||heterocyclic compound binding||transcription regulator activity	--	--
novel.1231	0	31.7213	7.47155	1.32e-06	UP	-	-	--	--	--	--	--	--	--	--
CacGene06845	111.764	27.3915	-2.03178	1.33e-06	DOWN	PF07714:Protein tyrosine kinase	sp|P0DH62|Y4407_SELML Inactive protein kinase SELMODRAFT_444075 OS=Selaginella moellendorffii OX=88036 GN=SELMODRAFT_444075 PE=2 SV=1	GO:0006468||GO:0008152||GO:0006464||GO:0006793||GO:0006796||GO:0006807||GO:0008150||GO:0009987||GO:0016310||GO:0019538||GO:0036211||GO:0043170||GO:0043412||GO:0044237||GO:0044238||GO:0044260||GO:0044267||GO:0071704||GO:1901564	protein phosphorylation||metabolic process||cellular protein modification process||phosphorus metabolic process||phosphate-containing compound metabolic process||nitrogen compound metabolic process||biological_process||cellular process||phosphorylation||protein metabolic process||protein modification process||macromolecule metabolic process||macromolecule modification||cellular metabolic process|…			GO:0004672||GO:0003674||GO:0003824||GO:0016301||GO:0016740||GO:0016772||GO:0016773||GO:0140096	protein kinase activity||molecular_function||catalytic activity||kinase activity||transferase activity||transferase activity, transferring phosphorus-containing groups||phosphotransferase activity, alcohol group as acceptor||catalytic activity, acting on a protein	--	--
CacGene01210	414.478	966.242	1.22014	1.35e-06	UP	PF04759:Protein of unknown function, DUF617	sp|O23160|MYB73_ARATH Transcription factor MYB73 OS=Arabidopsis thaliana OX=3702 GN=MYB73 PE=1 SV=1	--	--	--	--	--	--	--	--
CacGene19456	112.541	586.947	2.38448	1.38e-06	UP	PF00155:Aminotransferase class I and II	sp|Q9LQ10|1A110_ARATH Probable aminotransferase ACS10 OS=Arabidopsis thaliana OX=3702 GN=ACS10 PE=1 SV=1	GO:0009058||GO:0008152||GO:0008150	biosynthetic process||metabolic process||biological_process			GO:0030170||GO:0003674||GO:0005488||GO:0008144||GO:0019842||GO:0036094||GO:0043167||GO:0043168||GO:0048037||GO:0050662||GO:0070279||GO:0097159||GO:1901363	pyridoxal phosphate binding||molecular_function||binding||drug binding||vitamin binding||small molecule binding||ion binding||anion binding||cofactor binding||coenzyme binding||vitamin B6 binding||organic cyclic compound binding||heterocyclic compound binding	--	--
CacGene01446	802.178	1836.16	1.19473	1.44e-06	UP	PF01494:FAD binding domain	sp|C3VEQ2|ZEP_ONCHC Zeaxanthin epoxidase, chloroplastic OS=Oncidium hybrid cultivar OX=141207 GN=ZEP PE=2 SV=1					GO:0071949||GO:0000166||GO:0003674||GO:0005488||GO:0036094||GO:0043167||GO:0043168||GO:0048037||GO:0050660||GO:0050662||GO:0097159||GO:1901265||GO:1901363	FAD binding||nucleotide binding||molecular_function||binding||small molecule binding||ion binding||anion binding||cofactor binding||flavin adenine dinucleotide binding||coenzyme binding||organic cyclic compound binding||nucleoside phosphate binding||heterocyclic compound binding	egr00906||egr01100||egr01110	Carotenoid biosynthesis||Metabolic pathways||Biosynthesis of secondary metabolites
CacGene20595	942.06	313.312	-1.58804	1.44e-06	DOWN	PF02779:Transketolase, pyrimidine binding domain|PF02780:Transketolase, C-terminal domain|PF13292:9-deoxy-D-xylulose-1-phosphate synthase		GO:0055114||GO:0008152||GO:0008150	oxidation-reduction process||metabolic process||biological_process			GO:0016616||GO:0051287||GO:0003674||GO:0003824||GO:0016491||GO:0016614||GO:0000166||GO:0005488||GO:0036094||GO:0048037||GO:0050662||GO:0097159||GO:1901265||GO:1901363	oxidoreductase activity, acting on the CH-OH group of donors, NAD or NADP as acceptor||NAD binding||molecular_function||catalytic activity||oxidoreductase activity||oxidoreductase activity, acting on CH-OH group of donors||nucleotide binding||binding||small molecule binding||cofactor binding||coenzyme binding||organic cyclic compound binding||nucleoside phosphate binding||heterocyclic compound bi…	egr00040||egr00053||egr00520||egr01100||egr01240||egr01250	Pentose and glucuronate interconversions||Ascorbate and aldarate metabolism||Amino sugar and nucleotide sugar metabolism||Metabolic pathways||Biosynthesis of cofactors||Biosynthesis of nucleotide sugars
CacGene05660	136.394	870.311	2.67095	1.47e-06	UP	PF00067:Cytochrome P450	sp|A0A068Q609|C7124_PRUMU Phenylacetaldehyde oxime monooxygenase CYP71AN24 OS=Prunus mume OX=102107 GN=CYP71AN24 PE=1 SV=1	GO:0055114||GO:0008152||GO:0008150	oxidation-reduction process||metabolic process||biological_process			GO:0005506||GO:0016705||GO:0020037||GO:0003674||GO:0005488||GO:0046872||GO:0043167||GO:0043169||GO:0046914||GO:0003824||GO:0016491||GO:0046906||GO:0048037||GO:0097159||GO:1901363	iron ion binding||oxidoreductase activity, acting on paired donors, with incorporation or reduction of molecular oxygen||heme binding||molecular_function||binding||metal ion binding||ion binding||cation binding||transition metal ion binding||catalytic activity||oxidoreductase activity||tetrapyrrole binding||cofactor binding||organic cyclic compound binding||heterocyclic compound binding	--	--
CacGene26657	1079.09	104.197	-3.37176	1.48e-06	DOWN	PF03106:WRKY DNA -binding domain	sp|Q9LY00|WRK70_ARATH Probable WRKY transcription factor 70 OS=Arabidopsis thaliana OX=3702 GN=WRKY70 PE=1 SV=1	GO:0006355||GO:0008152||GO:0006139||GO:0006351||GO:0006725||GO:0006807||GO:0008150||GO:0009058||GO:0009059||GO:0009889||GO:0009987||GO:0010467||GO:0010468||GO:0010556||GO:0016070||GO:0018130||GO:0019219||GO:0019222||GO:0019438||GO:0031323||GO:0031326||GO:0032774||GO:0034641||GO:0034645||GO:0034654||GO:0043170||GO:0044237||GO:0044238||GO:0044249||GO:0044260||GO:0044271||GO:0046483||GO:0050789||GO:…	regulation of transcription, DNA-templated||metabolic process||nucleobase-containing compound metabolic process||transcription, DNA-templated||cellular aromatic compound metabolic process||nitrogen compound metabolic process||biological_process||biosynthetic process||macromolecule biosynthetic process||regulation of biosynthetic process||cellular process||gene expression||regulation of gene expre…			GO:0003700||GO:0043565||GO:0003674||GO:0140110||GO:0003676||GO:0003677||GO:0005488||GO:0097159||GO:1901363	DNA binding transcription factor activity||sequence-specific DNA binding||molecular_function||transcription regulator activity||nucleic acid binding||DNA binding||binding||organic cyclic compound binding||heterocyclic compound binding	--	--
CacGene18422	321.801	987.12	1.61667	1.49e-06	UP	PF00487:Fatty acid desaturase	sp|Q949X0|ADS3_ARATH Palmitoyl-monogalactosyldiacylglycerol delta-7 desaturase, chloroplastic OS=Arabidopsis thaliana OX=3702 GN=ADS3 PE=1 SV=2	GO:0006629||GO:0008152||GO:0008150||GO:0044238||GO:0071704	lipid metabolic process||metabolic process||biological_process||primary metabolic process||organic substance metabolic process					--	--
CacGene17570	11.7348	145.593	3.62205	1.51e-06	UP	PF00067:Cytochrome P450	sp|H2DH17|C7A22_PANGI Cytochrome P450 CYP749A22 OS=Panax ginseng OX=4054 PE=2 SV=1	GO:0055114||GO:0008152||GO:0008150	oxidation-reduction process||metabolic process||biological_process			GO:0005506||GO:0016705||GO:0020037||GO:0003674||GO:0005488||GO:0046872||GO:0043167||GO:0043169||GO:0046914||GO:0003824||GO:0016491||GO:0046906||GO:0048037||GO:0097159||GO:1901363	iron ion binding||oxidoreductase activity, acting on paired donors, with incorporation or reduction of molecular oxygen||heme binding||molecular_function||binding||metal ion binding||ion binding||cation binding||transition metal ion binding||catalytic activity||oxidoreductase activity||tetrapyrrole binding||cofactor binding||organic cyclic compound binding||heterocyclic compound binding	--	--
CacGene03184	1173.57	216.077	-2.44227	1.51e-06	DOWN	PF12796:Ankyrin repeats (3 copies)|PF16211:C-terminus of histone H2A|PF00125:Core histone H2A/H2B/H3/H4	sp|O65759|H2AX_CICAR Histone H2AX OS=Cicer arietinum OX=3827 GN=HIS2A PE=2 SV=1			GO:0000786||GO:0005622||GO:0005575||GO:0000785||GO:0005623||GO:0005694||GO:0032991||GO:0032993||GO:0043226||GO:0043228||GO:0043229||GO:0043232||GO:0044422||GO:0044424||GO:0044427||GO:0044446||GO:0044464||GO:0044815	nucleosome||intracellular||cellular_component||chromatin||cell||chromosome||protein-containing complex||protein-DNA complex||organelle||non-membrane-bounded organelle||intracellular organelle||intracellular non-membrane-bounded organelle||organelle part||intracellular part||chromosomal part||intracellular organelle part||cell part||DNA packaging complex	GO:0046982||GO:0003677||GO:0005515||GO:0003674||GO:0005488||GO:0046983||GO:0003676||GO:0097159||GO:1901363	protein heterodimerization activity||DNA binding||protein binding||molecular_function||binding||protein dimerization activity||nucleic acid binding||organic cyclic compound binding||heterocyclic compound binding	--	--
CacGene18895	118.362	1366.67	3.52987	1.53e-06	UP	PF02221:ML domain	-	--	--	--	--	--	--	--	--
CacGene11761	21.8468	140.329	2.67844	1.59e-06	UP	PF03106:WRKY DNA -binding domain|PF10533:Plant zinc cluster domain	sp|Q32SG4|WRKY1_MAIZE Protein WRKY1 OS=Zea mays OX=4577 PE=1 SV=1	GO:0006355||GO:0008152||GO:0006139||GO:0006351||GO:0006725||GO:0006807||GO:0008150||GO:0009058||GO:0009059||GO:0009889||GO:0009987||GO:0010467||GO:0010468||GO:0010556||GO:0016070||GO:0018130||GO:0019219||GO:0019222||GO:0019438||GO:0031323||GO:0031326||GO:0032774||GO:0034641||GO:0034645||GO:0034654||GO:0043170||GO:0044237||GO:0044238||GO:0044249||GO:0044260||GO:0044271||GO:0046483||GO:0050789||GO:…	regulation of transcription, DNA-templated||metabolic process||nucleobase-containing compound metabolic process||transcription, DNA-templated||cellular aromatic compound metabolic process||nitrogen compound metabolic process||biological_process||biosynthetic process||macromolecule biosynthetic process||regulation of biosynthetic process||cellular process||gene expression||regulation of gene expre…			GO:0003700||GO:0043565||GO:0003674||GO:0140110||GO:0003676||GO:0003677||GO:0005488||GO:0097159||GO:1901363	DNA binding transcription factor activity||sequence-specific DNA binding||molecular_function||transcription regulator activity||nucleic acid binding||DNA binding||binding||organic cyclic compound binding||heterocyclic compound binding	--	--
CacGene08406	160.282	42.4729	-1.91325	1.6e-06	DOWN	-	sp|Q8LDK3|NDUB2_ARATH NADH dehydrogenase [ubiquinone] 1 beta subcomplex subunit 2 OS=Arabidopsis thaliana OX=3702 GN=At1g76200 PE=1 SV=1	--	--	--	--	--	--	--	--
CacGene07345	643.906	1723	1.42027	1.61e-06	UP	PF03407:Nucleotide-diphospho-sugar transferase	sp|P0C042|Y4597_ARATH Uncharacterized protein At4g15970 OS=Arabidopsis thaliana OX=3702 GN=At4g15970 PE=2 SV=1	--	--	--	--	--	--	--	--
CacGene27102	49.8455	0.971358	-5.64257	1.62e-06	DOWN	PF13921:Myb-like DNA-binding domain|PF11831:pre-mRNA splicing factor component	sp|P92948|CDC5L_ARATH Cell division cycle 5-like protein OS=Arabidopsis thaliana OX=3702 GN=CDC5 PE=1 SV=2					GO:0003677||GO:0003674||GO:0003676||GO:0005488||GO:0097159||GO:1901363	DNA binding||molecular_function||nucleic acid binding||binding||organic cyclic compound binding||heterocyclic compound binding	egr03040	Spliceosome
CacGene09795	8.81573	145.811	4.0415	1.63e-06	UP	PF02779:Transketolase, pyrimidine binding domain|PF02780:Transketolase, C-terminal domain|PF13292:8-deoxy-U-xylulose-4-phosphate synthase	sp|Q9SZY4|PTR27_ARATH Protein NRT1/ PTR FAMILY 6.2 OS=Arabidopsis thaliana OX=3702 GN=NPF6.2 PE=1 SV=1	GO:0055085||GO:0006810||GO:0008150||GO:0051179||GO:0051234	transmembrane transport||transport||biological_process||localization||establishment of localization	GO:0016020||GO:0005575	membrane||cellular_component	GO:0022857||GO:0003674||GO:0005215	transmembrane transporter activity||molecular_function||transporter activity	--	--
CacGene11567	1042.74	150.596	-2.79265	1.63e-06	DOWN	PF00348:Polyprenyl synthetase	sp|P34802|GGPP1_ARATH Heterodimeric geranylgeranyl pyrophosphate synthase large subunit 1, chloroplastic OS=Arabidopsis thaliana OX=3702 GN=GGPPS1 PE=1 SV=2	GO:0008299||GO:0008152||GO:0006629||GO:0006720||GO:0008150||GO:0008610||GO:0009058||GO:0009987||GO:0044237||GO:0044238||GO:0044249||GO:0044255||GO:0071704||GO:1901576	isoprenoid biosynthetic process||metabolic process||lipid metabolic process||isoprenoid metabolic process||biological_process||lipid biosynthetic process||biosynthetic process||cellular process||cellular metabolic process||primary metabolic process||cellular biosynthetic process||cellular lipid metabolic process||organic substance metabolic process||organic substance biosynthetic process					egr00900||egr01100||egr01110	Terpenoid backbone biosynthesis||Metabolic pathways||Biosynthesis of secondary metabolites
CacGene13340	1102.6	3726.71	1.75751	1.64e-06	UP	PF02779:Transketolase, pyrimidine binding domain|PF02780:Transketolase, C-terminal domain|PF13292:1-deoxy-U-xylulose-1-phosphate synthase	sp|Q5NAI4|PLA5_ORYSJ Phospholipase A1-II 5 OS=Oryza sativa subsp. japonica OX=39947 GN=Os01g0710700 PE=2 SV=1	GO:0006629||GO:0008152||GO:0008150||GO:0044238||GO:0071704	lipid metabolic process||metabolic process||biological_process||primary metabolic process||organic substance metabolic process					--	--
CacGene14957	404.17	1517.93	1.90866	1.65e-06	UP	PF07859:alpha/beta hydrolase fold	sp|Q8LFV3|CDF3_ARATH Cyclic dof factor 3 OS=Arabidopsis thaliana OX=3702 GN=CDF3 PE=1 SV=2	GO:0006355||GO:0008152||GO:0006139||GO:0006351||GO:0006725||GO:0006807||GO:0008150||GO:0009058||GO:0009059||GO:0009889||GO:0009987||GO:0010467||GO:0010468||GO:0010556||GO:0016070||GO:0018130||GO:0019219||GO:0019222||GO:0019438||GO:0031323||GO:0031326||GO:0032774||GO:0034641||GO:0034645||GO:0034654||GO:0043170||GO:0044237||GO:0044238||GO:0044249||GO:0044260||GO:0044271||GO:0046483||GO:0050789||GO:…	regulation of transcription, DNA-templated||metabolic process||nucleobase-containing compound metabolic process||transcription, DNA-templated||cellular aromatic compound metabolic process||nitrogen compound metabolic process||biological_process||biosynthetic process||macromolecule biosynthetic process||regulation of biosynthetic process||cellular process||gene expression||regulation of gene expre…			GO:0003677||GO:0003674||GO:0003676||GO:0005488||GO:0097159||GO:1901363	DNA binding||molecular_function||nucleic acid binding||binding||organic cyclic compound binding||heterocyclic compound binding	--	--
CacGene09906	172.144	55.0905	-1.6459	1.66e-06	DOWN	-	sp|D2CSU4|CM1_PETHY Chorismate mutase 1, chloroplastic OS=Petunia hybrida OX=4102 GN=CM1 PE=1 SV=1	GO:0046417||GO:0008152||GO:0006082||GO:0008150||GO:0009987||GO:0019752||GO:0043436||GO:0043648||GO:0044237||GO:0044281||GO:0071704	chorismate metabolic process||metabolic process||organic acid metabolic process||biological_process||cellular process||carboxylic acid metabolic process||oxoacid metabolic process||dicarboxylic acid metabolic process||cellular metabolic process||small molecule metabolic process||organic substance metabolic process					egr00400||egr01100||egr01110||egr01230	Phenylalanine, tyrosine and tryptophan biosynthesis||Metabolic pathways||Biosynthesis of secondary metabolites||Biosynthesis of amino acids
CacGene27367	78.9047	377.875	2.26418	1.66e-06	UP	-	-	--	--	--	--	--	--	--	--
CacGene08505	1.03607	322.384	8.32003	1.67e-06	UP	PF02779:Transketolase, pyrimidine binding domain|PF02780:Transketolase, C-terminal domain|PF13292:1-deoxy-U-xylulose-8-phosphate synthase	sp|Q6L8G1|IRT2_ORYSJ Fe(2+) transport protein 2 OS=Oryza sativa subsp. japonica OX=39947 GN=IRT2 PE=2 SV=1	GO:0030001||GO:0055085||GO:0006810||GO:0006811||GO:0006812||GO:0008150||GO:0051179||GO:0051234	metal ion transport||transmembrane transport||transport||ion transport||cation transport||biological_process||localization||establishment of localization	GO:0016020||GO:0005575	membrane||cellular_component	GO:0046873||GO:0003674||GO:0005215||GO:0022857||GO:0008324||GO:0015075||GO:0015318||GO:0022890	metal ion transmembrane transporter activity||molecular_function||transporter activity||transmembrane transporter activity||cation transmembrane transporter activity||ion transmembrane transporter activity||inorganic molecular entity transmembrane transporter activity||inorganic cation transmembrane transporter activity	--	--
novel.2016	169.623	965.029	2.50862	1.68e-06	UP	PF03171:2OG-Fe(II) oxygenase superfamily	sp|Q8H1S4|ACCH3_ARATH 1-aminocyclopropane-1-carboxylate oxidase homolog 3 OS=Arabidopsis thaliana OX=3702 GN=At1g06650 PE=2 SV=1	GO:0055114||GO:0008152||GO:0008150	oxidation-reduction process||metabolic process||biological_process			GO:0016491||GO:0003674||GO:0003824	oxidoreductase activity||molecular_function||catalytic activity	--	--
CacGene03805	253.802	1378.9	2.4432	1.73e-06	UP	PF00067:Cytochrome P450	sp|O64989|C90B1_ARATH Cytochrome P450 90B1 OS=Arabidopsis thaliana OX=3702 GN=CYP90B1 PE=1 SV=2	GO:0055114||GO:0008152||GO:0008150	oxidation-reduction process||metabolic process||biological_process			GO:0005506||GO:0016705||GO:0020037||GO:0003674||GO:0005488||GO:0046872||GO:0043167||GO:0043169||GO:0046914||GO:0003824||GO:0016491||GO:0046906||GO:0048037||GO:0097159||GO:1901363	iron ion binding||oxidoreductase activity, acting on paired donors, with incorporation or reduction of molecular oxygen||heme binding||molecular_function||binding||metal ion binding||ion binding||cation binding||transition metal ion binding||catalytic activity||oxidoreductase activity||tetrapyrrole binding||cofactor binding||organic cyclic compound binding||heterocyclic compound binding	egr00905||egr01100||egr01110	Brassinosteroid biosynthesis||Metabolic pathways||Biosynthesis of secondary metabolites
CacGene03444	12279.9	26130.5	1.08942	1.75e-06	UP	PF00240:Ubiquitin family	sp|P69309|UBIQP_AVEFA Polyubiquitin OS=Avena fatua OX=4499 PE=2 SV=2					GO:0005515||GO:0003674||GO:0005488	protein binding||molecular_function||binding	egr04120	Ubiquitin mediated proteolysis
CacGene22498	670.888	192.106	-1.80361	1.81e-06	DOWN	PF02779:Transketolase, pyrimidine binding domain|PF02780:Transketolase, C-terminal domain|PF13292:6-deoxy-D-xylulose-1-phosphate synthase		GO:0055114||GO:0008152||GO:0008150	oxidation-reduction process||metabolic process||biological_process			GO:0051287||GO:0016616||GO:0000166||GO:0003674||GO:0005488||GO:0036094||GO:0048037||GO:0050662||GO:0097159||GO:1901265||GO:1901363||GO:0003824||GO:0016491||GO:0016614	NAD binding||oxidoreductase activity, acting on the CH-OH group of donors, NAD or NADP as acceptor||nucleotide binding||molecular_function||binding||small molecule binding||cofactor binding||coenzyme binding||organic cyclic compound binding||nucleoside phosphate binding||heterocyclic compound binding||catalytic activity||oxidoreductase activity||oxidoreductase activity, acting on CH-OH group of d…	egr00260||egr00270||egr01100||egr01110||egr01200||egr01230	Glycine, serine and threonine metabolism||Cysteine and methionine metabolism||Metabolic pathways||Biosynthesis of secondary metabolites||Carbon metabolism||Biosynthesis of amino acids
CacGene25219	1293.76	570.483	-1.18108	1.83e-06	DOWN	PF13370:4Fe-4S single cluster domain of Ferredoxin I|PF00226:DnaJ domain	sp|Q8L8A5|GIF1_ARATH GRF1-interacting factor 1 OS=Arabidopsis thaliana OX=3702 GN=GIF1 PE=1 SV=1					GO:0003713||GO:0000988||GO:0000989||GO:0003674||GO:0003712||GO:0140110	transcription coactivator activity||transcription factor activity, protein binding||transcription factor activity, transcription factor binding||molecular_function||transcription cofactor activity||transcription regulator activity	--	--
CacGene00341	347.959	720.956	1.05029	1.87e-06	UP	PF13639:Ring finger domain	sp|Q8RXX9|ATL6_ARATH E3 ubiquitin-protein ligase ATL6 OS=Arabidopsis thaliana OX=3702 GN=ATL6 PE=1 SV=2	--	--	--	--	--	--	--	--
CacGene07748	164.767	33.5114	-2.29519	1.88e-06	DOWN	PF16913:Purine nucleobase transmembrane transport	sp|Q9FZ95|PUP3_ARATH Purine permease 3 OS=Arabidopsis thaliana OX=3702 GN=PUP3 PE=2 SV=1	--	--	--	--	--	--	--	--
CacGene25375	1501.44	7726.81	2.36346	1.9e-06	UP	PF03330:Lytic transglycolase|PF01357:Pollen allergen	sp|O22874|EXPA8_ARATH Expansin-A8 OS=Arabidopsis thaliana OX=3702 GN=EXPA8 PE=2 SV=1	--	--	--	--	--	--	--	--
CacGene06252	253.666	26.0622	-3.2878	1.93e-06	DOWN	-	sp|A0A251PW43|DRO1_PRUPE Protein DEEPER ROOTING 1 OS=Prunus persica OX=3760 GN=DRO1 PE=2 SV=1	--	--	--	--	--	--	--	--
CacGene26241	255.491	52.4138	-2.28919	1.94e-06	DOWN	PF02182:SAD/SRA domain|PF00097:Zinc finger, C3HC4 type (RING finger)|PF13445:RING-type zinc-finger	sp|Q8VYZ0|ORTH2_ARATH E3 ubiquitin-protein ligase ORTHRUS 2 OS=Arabidopsis thaliana OX=3702 GN=ORTH2 PE=1 SV=1					GO:0046872||GO:0003674||GO:0005488||GO:0043167||GO:0043169	metal ion binding||molecular_function||binding||ion binding||cation binding	--	--
CacGene02274	864.667	139.654	-2.63138	1.95e-06	DOWN	PF03094:Mlo family	sp|O23693|MLO4_ARATH MLO-like protein 4 OS=Arabidopsis thaliana OX=3702 GN=MLO4 PE=2 SV=2	GO:0006952||GO:0006950||GO:0008150||GO:0050896	defense response||response to stress||biological_process||response to stimulus	GO:0016021||GO:0005575||GO:0016020||GO:0031224||GO:0044425	integral component of membrane||cellular_component||membrane||intrinsic component of membrane||membrane part			--	--
CacGene05999	605.15	3644.13	2.59029	2.02e-06	UP	-	sp|Q8LPQ5|BTS_ARATH Zinc finger protein BRUTUS OS=Arabidopsis thaliana OX=3702 GN=BTS PE=1 SV=1	--	--	--	--	--	--	--	--
CacGene12027	1394.26	4491.48	1.68745	2.04e-06	UP	PF01650:Peptidase C13 family	sp|P49043|VPE_CITSI Vacuolar-processing enzyme OS=Citrus sinensis OX=2711 PE=2 SV=1	GO:0006508||GO:0008152||GO:0006807||GO:0008150||GO:0019538||GO:0043170||GO:0044238||GO:0071704||GO:1901564	proteolysis||metabolic process||nitrogen compound metabolic process||biological_process||protein metabolic process||macromolecule metabolic process||primary metabolic process||organic substance metabolic process||organonitrogen compound metabolic process			GO:0008233||GO:0003674||GO:0003824||GO:0016787||GO:0140096	peptidase activity||molecular_function||catalytic activity||hydrolase activity||catalytic activity, acting on a protein	--	--
CacGene12664	208.405	33.4117	-2.64599	2.07e-06	DOWN	-	-	--	--	--	--	--	--	--	--
CacGene24853	176.469	25.6195	-2.78895	2.07e-06	DOWN	PF07983:X8 domain|PF00332:Glycosyl hydrolases family 17	sp|Q06915|EA6_ARATH Probable glucan endo-1,3-beta-glucosidase A6 OS=Arabidopsis thaliana OX=3702 GN=A6 PE=2 SV=1	GO:0005975||GO:0008152||GO:0008150||GO:0044238||GO:0071704	carbohydrate metabolic process||metabolic process||biological_process||primary metabolic process||organic substance metabolic process			GO:0004553||GO:0003674||GO:0003824||GO:0016787||GO:0016798	hydrolase activity, hydrolyzing O-glycosyl compounds||molecular_function||catalytic activity||hydrolase activity||hydrolase activity, acting on glycosyl bonds	--	--
CacGene26648	487.265	217.269	-1.16528	2.09e-06	DOWN	PF00118:TCP-1/cpn60 chaperonin family	sp|Q9LV21|TCPD_ARATH T-complex protein 1 subunit delta OS=Arabidopsis thaliana OX=3702 GN=CCT4 PE=1 SV=1					GO:0005524||GO:0000166||GO:0003674||GO:0005488||GO:0008144||GO:0017076||GO:0030554||GO:0032553||GO:0032555||GO:0032559||GO:0035639||GO:0036094||GO:0043167||GO:0043168||GO:0097159||GO:0097367||GO:1901265||GO:1901363	ATP binding||nucleotide binding||molecular_function||binding||drug binding||purine nucleotide binding||adenyl nucleotide binding||ribonucleotide binding||purine ribonucleotide binding||adenyl ribonucleotide binding||purine ribonucleoside triphosphate binding||small molecule binding||ion binding||anion binding||organic cyclic compound binding||carbohydrate derivative binding||nucleoside phosphate …	--	--
CacGene22496	472.805	83.597	-2.50148	2.15e-06	DOWN	PF13855:Leucine rich repeat|PF08263:Leucine rich repeat N-terminal domain|PF00069:Protein kinase domain	sp|Q94C77|RPKL_ARATH Receptor protein kinase-like protein At4g34220 OS=Arabidopsis thaliana OX=3702 GN=At4g34220 PE=2 SV=1	GO:0006468||GO:0008152||GO:0006464||GO:0006793||GO:0006796||GO:0006807||GO:0008150||GO:0009987||GO:0016310||GO:0019538||GO:0036211||GO:0043170||GO:0043412||GO:0044237||GO:0044238||GO:0044260||GO:0044267||GO:0071704||GO:1901564	protein phosphorylation||metabolic process||cellular protein modification process||phosphorus metabolic process||phosphate-containing compound metabolic process||nitrogen compound metabolic process||biological_process||cellular process||phosphorylation||protein metabolic process||protein modification process||macromolecule metabolic process||macromolecule modification||cellular metabolic process|…			GO:0005515||GO:0004672||GO:0005524||GO:0003674||GO:0005488||GO:0003824||GO:0016301||GO:0016740||GO:0016772||GO:0016773||GO:0140096||GO:0000166||GO:0008144||GO:0017076||GO:0030554||GO:0032553||GO:0032555||GO:0032559||GO:0035639||GO:0036094||GO:0043167||GO:0043168||GO:0097159||GO:0097367||GO:1901265||GO:1901363	protein binding||protein kinase activity||ATP binding||molecular_function||binding||catalytic activity||kinase activity||transferase activity||transferase activity, transferring phosphorus-containing groups||phosphotransferase activity, alcohol group as acceptor||catalytic activity, acting on a protein||nucleotide binding||drug binding||purine nucleotide binding||adenyl nucleotide binding||ribonu…	--	--
CacGene13614	107.27	18.1666	-2.5546	2.16e-06	DOWN	PF00201:UDP-glucoronosyl and UDP-glucosyl transferase	sp|K7NBW3|74AC1_SIRGR Mogroside IE synthase OS=Siraitia grosvenorii OX=190515 GN=UGT74AC1 PE=1 SV=1					GO:0016758||GO:0003674||GO:0003824||GO:0016740||GO:0016757	transferase activity, transferring hexosyl groups||molecular_function||catalytic activity||transferase activity||transferase activity, transferring glycosyl groups	--	--
CacGene13829	57.3368	215.497	1.91639	2.23e-06	UP	PF00860:Permease family	sp|Q9SHZ3|NAT1_ARATH Nucleobase-ascorbate transporter 1 OS=Arabidopsis thaliana OX=3702 GN=NAT1 PE=2 SV=1	GO:0055085||GO:0006810||GO:0008150||GO:0051179||GO:0051234	transmembrane transport||transport||biological_process||localization||establishment of localization	GO:0016020||GO:0005575	membrane||cellular_component	GO:0022857||GO:0003674||GO:0005215	transmembrane transporter activity||molecular_function||transporter activity	--	--
CacGene02149	150.411	768.53	2.35346	2.23e-06	UP	PF00201:UDP-glucoronosyl and UDP-glucosyl transferase	sp|Q40287|UFOG5_MANES Anthocyanidin 3-O-glucosyltransferase 5 OS=Manihot esculenta OX=3983 GN=GT5 PE=2 SV=1					GO:0016758||GO:0003674||GO:0003824||GO:0016740||GO:0016757	transferase activity, transferring hexosyl groups||molecular_function||catalytic activity||transferase activity||transferase activity, transferring glycosyl groups	egr00940||egr01110	Phenylpropanoid biosynthesis||Biosynthesis of secondary metabolites
CacGene01173	261.712	561.483	1.10244	2.29e-06	UP	PF05063:MT-A70	sp|Q8LFA9|METL2_ARATH Methyltransferase-like protein 2 OS=Arabidopsis thaliana OX=3702 GN=At1g19340 PE=2 SV=2	--	--	--	--	--	--	--	--
CacGene05515	518.303	2080.53	2.00468	2.29e-06	UP	PF02779:Transketolase, pyrimidine binding domain|PF02780:Transketolase, C-terminal domain|PF13292:5-deoxy-U-xylulose-2-phosphate synthase	sp|Q8H157|PTR19_ARATH Protein NRT1/ PTR FAMILY 4.6 OS=Arabidopsis thaliana OX=3702 GN=NPF4.6 PE=1 SV=1	GO:0055085||GO:0006810||GO:0008150||GO:0051179||GO:0051234	transmembrane transport||transport||biological_process||localization||establishment of localization	GO:0016020||GO:0005575	membrane||cellular_component	GO:0022857||GO:0003674||GO:0005215	transmembrane transporter activity||molecular_function||transporter activity	--	--
novel.1191	13.593	103.659	2.91674	2.36e-06	UP	-	-	--	--	--	--	--	--	--	--
CacGene22184	187.574	2335.58	3.63844	2.36e-06	UP	PF00407:Pathogenesis-related protein Bet v I family	sp|Q40280|MAL12_MALDO Major allergen Mal d 1 OS=Malus domestica OX=3750 PE=1 SV=3	GO:0006952||GO:0006950||GO:0008150||GO:0050896	defense response||response to stress||biological_process||response to stimulus					--	--
CacGene21327	181.285	34.9587	-2.37784	2.38e-06	DOWN	PF00225:Kinesin motor domain	sp|F4J2K4|KN7O_ARATH Kinesin-like protein KIN-7O OS=Arabidopsis thaliana OX=3702 GN=KIN7O PE=3 SV=1	GO:0007018||GO:0007017||GO:0006928||GO:0008150||GO:0009987	microtubule-based movement||microtubule-based process||movement of cell or subcellular component||biological_process||cellular process			GO:0003777||GO:0005524||GO:0008017||GO:0003674||GO:0003774||GO:0003824||GO:0017111||GO:0016462||GO:0016787||GO:0016817||GO:0016818||GO:0000166||GO:0005488||GO:0008144||GO:0017076||GO:0030554||GO:0032553||GO:0032555||GO:0032559||GO:0035639||GO:0036094||GO:0043167||GO:0043168||GO:0097159||GO:0097367||GO:1901265||GO:1901363||GO:0005515||GO:0008092||GO:0015631	microtubule motor activity||ATP binding||microtubule binding||molecular_function||motor activity||catalytic activity||nucleoside-triphosphatase activity||pyrophosphatase activity||hydrolase activity||hydrolase activity, acting on acid anhydrides||hydrolase activity, acting on acid anhydrides, in phosphorus-containing anhydrides||nucleotide binding||binding||drug binding||purine nucleotide binding…	--	--
CacGene09533	74.9143	329.761	2.13254	2.38e-06	UP	-	-	--	--	--	--	--	--	--	--
CacGene23082	43.8823	0.681224	-6.02359	2.39e-06	DOWN	PF13561:Enoyl-(Acyl carrier protein) reductase	sp|A3F5F0|SDH_SINHE Secoisolariciresinol dehydrogenase OS=Sinopodophyllum hexandrum OX=93608 GN=SDH PE=1 SV=1	--	--	--	--	--	--	--	--
CacGene20043	194.017	51.7199	-1.90916	2.41e-06	DOWN	PF04783:Protein of unknown function (DUF630)|PF04782:Protein of unknown function (DUF632)	sp|Q93YU8|NRG2_ARATH Nitrate regulatory gene2 protein OS=Arabidopsis thaliana OX=3702 GN=NRG2 PE=1 SV=1	--	--	--	--	--	--	--	--
CacGene12892	343.091	1104.38	1.6872	2.45e-06	UP	PF02779:Transketolase, pyrimidine binding domain|PF02780:Transketolase, C-terminal domain|PF13292:3-deoxy-U-xylulose-1-phosphate synthase	sp|Q88BD4|ALGC_PSESM Phosphomannomutase/phosphoglucomutase OS=Pseudomonas syringae pv. tomato (strain ATCC BAA-871 / DC3000) OX=223283 GN=algC PE=3 SV=1	GO:0005975||GO:0008152||GO:0008150||GO:0044238||GO:0071704	carbohydrate metabolic process||metabolic process||biological_process||primary metabolic process||organic substance metabolic process			GO:0016868||GO:0003674||GO:0003824||GO:0016853||GO:0016866	intramolecular transferase activity, phosphotransferases||molecular_function||catalytic activity||isomerase activity||intramolecular transferase activity	--	--
CacGene07902	178.184	695.681	1.96417	2.46e-06	UP	-	sp|Q9SUM5|BH146_ARATH Transcription factor bHLH146 OS=Arabidopsis thaliana OX=3702 GN=BHLH146 PE=2 SV=1	--	--	--	--	--	--	--	--
CacGene27082	3.05143	74.9719	4.58759	2.5e-06	UP	-	sp|M4ISH1|CCL6_HUMLU Probable CoA ligase CCL6 OS=Humulus lupulus OX=3486 GN=CCL6 PE=2 SV=1	--	--	--	--	--	--	egr00061||egr00071||egr01100||egr01212||egr04146	Fatty acid biosynthesis||Fatty acid degradation||Metabolic pathways||Fatty acid metabolism||Peroxisome
CacGene08926	56.7227	7.84562	-2.86525	2.5e-06	DOWN	PF14559:Tetratricopeptide repeat	sp|Q9SUC3|MS5_ARATH Protein POLLENLESS 3 OS=Arabidopsis thaliana OX=3702 GN=MS5 PE=2 SV=2					GO:0005515||GO:0003674||GO:0005488	protein binding||molecular_function||binding	--	--
CacGene27441	91.2933	7.16034	-3.67579	2.59e-06	DOWN	PF00069:Protein kinase domain	sp|Q8RXC8|RBK2_ARATH Receptor-like cytosolic serine/threonine-protein kinase RBK2 OS=Arabidopsis thaliana OX=3702 GN=RBK2 PE=1 SV=1	GO:0006468||GO:0008152||GO:0006464||GO:0006793||GO:0006796||GO:0006807||GO:0008150||GO:0009987||GO:0016310||GO:0019538||GO:0036211||GO:0043170||GO:0043412||GO:0044237||GO:0044238||GO:0044260||GO:0044267||GO:0071704||GO:1901564	protein phosphorylation||metabolic process||cellular protein modification process||phosphorus metabolic process||phosphate-containing compound metabolic process||nitrogen compound metabolic process||biological_process||cellular process||phosphorylation||protein metabolic process||protein modification process||macromolecule metabolic process||macromolecule modification||cellular metabolic process|…			GO:0004672||GO:0005524||GO:0003674||GO:0003824||GO:0016301||GO:0016740||GO:0016772||GO:0016773||GO:0140096||GO:0000166||GO:0005488||GO:0008144||GO:0017076||GO:0030554||GO:0032553||GO:0032555||GO:0032559||GO:0035639||GO:0036094||GO:0043167||GO:0043168||GO:0097159||GO:0097367||GO:1901265||GO:1901363	protein kinase activity||ATP binding||molecular_function||catalytic activity||kinase activity||transferase activity||transferase activity, transferring phosphorus-containing groups||phosphotransferase activity, alcohol group as acceptor||catalytic activity, acting on a protein||nucleotide binding||binding||drug binding||purine nucleotide binding||adenyl nucleotide binding||ribonucleotide binding|…	--	--
CacGene10338	3053.71	7951.67	1.38083	2.62e-06	UP	PF02779:Transketolase, pyrimidine binding domain|PF02780:Transketolase, C-terminal domain|PF13292:3-deoxy-U-xylulose-1-phosphate synthase	sp|Q10J20|D14L_ORYSJ Probable esterase D14L OS=Oryza sativa subsp. japonica OX=39947 GN=D14L PE=1 SV=1	--	--	--	--	--	--	--	--
CacGene23223	77.6791	499.91	2.68255	2.62e-06	UP	PF02779:Transketolase, pyrimidine binding domain|PF02780:Transketolase, C-terminal domain|PF13292:7-deoxy-U-xylulose-2-phosphate synthase	sp|Q0IWF3|NIP31_ORYSJ Aquaporin NIP3-1 OS=Oryza sativa subsp. japonica OX=39947 GN=NIP3-1 PE=2 SV=2	GO:0055085||GO:0006810||GO:0008150||GO:0051179||GO:0051234	transmembrane transport||transport||biological_process||localization||establishment of localization	GO:0016020||GO:0005575	membrane||cellular_component	GO:0015267||GO:0003674||GO:0005215||GO:0022857||GO:0022803	channel activity||molecular_function||transporter activity||transmembrane transporter activity||passive transmembrane transporter activity	--	--
CacGene13918	494.671	1043.64	1.0781	2.72e-06	UP	PF00249:Myb-like DNA-binding domain	sp|P81393|MYB08_ANTMA Myb-related protein 308 OS=Antirrhinum majus OX=4151 GN=MYB308 PE=2 SV=1					GO:0003677||GO:0003674||GO:0003676||GO:0005488||GO:0097159||GO:1901363	DNA binding||molecular_function||nucleic acid binding||binding||organic cyclic compound binding||heterocyclic compound binding	--	--
CacGene09509	497.341	1161.24	1.22361	2.74e-06	UP	PF08323:Starch synthase catalytic domain|PF00534:Glycosyl transferases group 1	sp|O82627|SSG1_ANTMA Granule-bound starch synthase 1, chloroplastic/amyloplastic OS=Antirrhinum majus OX=4151 GN=WAXY PE=2 SV=1	--	--	--	--	--	--	egr00500||egr01100||egr01110	Starch and sucrose metabolism||Metabolic pathways||Biosynthesis of secondary metabolites
CacGene22875	51.4806	4.75518	-3.4442	2.76e-06	DOWN	PF04535:Domain of unknown function (DUF588)	sp|B9SXY8|CSPLE_RICCO CASP-like protein 4D1 OS=Ricinus communis OX=3988 GN=RCOM_1206790 PE=3 SV=1	--	--	--	--	--	--	--	--
CacGene15955	12633.6	5361.07	-1.2367	2.77e-06	DOWN	PF17777:Insertion domain in 60S ribosomal protein L10P|PF00466:Ribosomal protein L10|PF00428:60s Acidic ribosomal protein	sp|P50346|RLA0_SOYBN 60S acidic ribosomal protein P0 OS=Glycine max OX=3847 PE=2 SV=1	GO:0042254||GO:0008150||GO:0022613||GO:0044085||GO:0071840	ribosome biogenesis||biological_process||ribonucleoprotein complex biogenesis||cellular component biogenesis||cellular component organization or biogenesis	GO:0005622||GO:0005575||GO:0005623||GO:0044464	intracellular||cellular_component||cell||cell part			egr03010	Ribosome
CacGene26977	130.282	22.5413	-2.52731	2.79e-06	DOWN	PF00332:Glycosyl hydrolases family 17	sp|A7PQW3|E13B_VITVI Glucan endo-1,3-beta-glucosidase OS=Vitis vinifera OX=29760 GN=VIT_06s0061g00120 PE=1 SV=2	GO:0005975||GO:0008152||GO:0008150||GO:0044238||GO:0071704	carbohydrate metabolic process||metabolic process||biological_process||primary metabolic process||organic substance metabolic process			GO:0004553||GO:0003674||GO:0003824||GO:0016787||GO:0016798	hydrolase activity, hydrolyzing O-glycosyl compounds||molecular_function||catalytic activity||hydrolase activity||hydrolase activity, acting on glycosyl bonds	--	--
CacGene00798	1374.28	395.056	-1.79855	2.81e-06	DOWN	PF02779:Transketolase, pyrimidine binding domain|PF02780:Transketolase, C-terminal domain|PF13292:1-deoxy-D-xylulose-1-phosphate synthase	sp|P35684|RL3_ORYSJ 60S ribosomal protein L3 OS=Oryza sativa subsp. japonica OX=39947 GN=RPL3 PE=2 SV=2	GO:0006412||GO:0008152||GO:0006518||GO:0006807||GO:0008150||GO:0009058||GO:0009059||GO:0009987||GO:0010467||GO:0019538||GO:0034641||GO:0034645||GO:0043043||GO:0043170||GO:0043603||GO:0043604||GO:0044237||GO:0044238||GO:0044249||GO:0044260||GO:0044267||GO:0044271||GO:0071704||GO:1901564||GO:1901566||GO:1901576	translation||metabolic process||peptide metabolic process||nitrogen compound metabolic process||biological_process||biosynthetic process||macromolecule biosynthetic process||cellular process||gene expression||protein metabolic process||cellular nitrogen compound metabolic process||cellular macromolecule biosynthetic process||peptide biosynthetic process||macromolecule metabolic process||cellular …	GO:0005622||GO:0005840||GO:0005575||GO:0005623||GO:0044464||GO:0005737||GO:0032991||GO:0043226||GO:0043228||GO:0043229||GO:0043232||GO:0044424||GO:0044444||GO:1990904	intracellular||ribosome||cellular_component||cell||cell part||cytoplasm||protein-containing complex||organelle||non-membrane-bounded organelle||intracellular organelle||intracellular non-membrane-bounded organelle||intracellular part||cytoplasmic part||ribonucleoprotein complex	GO:0003735||GO:0003674||GO:0005198	structural constituent of ribosome||molecular_function||structural molecule activity	egr03010	Ribosome
CacGene06441	55.4722	381.767	2.78147	2.82e-06	UP	PF04646:Protein of unknown function, DUF604	-	--	--	--	--	--	--	--	--
CacGene07181	39.5511	137.899	1.79561	2.85e-06	UP	PF04043:Plant invertase/pectin methylesterase inhibitor	-					GO:0004857||GO:0003674||GO:0030234||GO:0098772	enzyme inhibitor activity||molecular_function||enzyme regulator activity||molecular function regulator	--	--
CacGene05655	138.864	617.317	2.15301	2.9e-06	UP	PF02779:Transketolase, pyrimidine binding domain|PF02780:Transketolase, C-terminal domain|PF13292:3-deoxy-D-xylulose-5-phosphate synthase	-	--	--	--	--	--	--	--	--
CacGene18119	35.3903	157.711	2.15429	2.9e-06	UP	PF00704:Glycosyl hydrolases family 18	sp|A0A072UR65|CHT5B_MEDTR Class V chitinase CHIT5b OS=Medicago truncatula OX=3880 GN=CHIT5B PE=1 SV=1	GO:0005975||GO:0008152||GO:0008150||GO:0044238||GO:0071704	carbohydrate metabolic process||metabolic process||biological_process||primary metabolic process||organic substance metabolic process					egr00520||egr01100	Amino sugar and nucleotide sugar metabolism||Metabolic pathways
CacGene11427	250.096	73.3531	-1.76788	2.94e-06	DOWN	PF00069:Protein kinase domain|PF08263:Leucine rich repeat N-terminal domain	sp|Q9ZU46|ZAR1_ARATH Receptor protein kinase-like protein ZAR1 OS=Arabidopsis thaliana OX=3702 GN=ZAR1 PE=1 SV=1	GO:0006468||GO:0008152||GO:0006464||GO:0006793||GO:0006796||GO:0006807||GO:0008150||GO:0009987||GO:0016310||GO:0019538||GO:0036211||GO:0043170||GO:0043412||GO:0044237||GO:0044238||GO:0044260||GO:0044267||GO:0071704||GO:1901564	protein phosphorylation||metabolic process||cellular protein modification process||phosphorus metabolic process||phosphate-containing compound metabolic process||nitrogen compound metabolic process||biological_process||cellular process||phosphorylation||protein metabolic process||protein modification process||macromolecule metabolic process||macromolecule modification||cellular metabolic process|…			GO:0004672||GO:0005524||GO:0003674||GO:0003824||GO:0016301||GO:0016740||GO:0016772||GO:0016773||GO:0140096||GO:0000166||GO:0005488||GO:0008144||GO:0017076||GO:0030554||GO:0032553||GO:0032555||GO:0032559||GO:0035639||GO:0036094||GO:0043167||GO:0043168||GO:0097159||GO:0097367||GO:1901265||GO:1901363	protein kinase activity||ATP binding||molecular_function||catalytic activity||kinase activity||transferase activity||transferase activity, transferring phosphorus-containing groups||phosphotransferase activity, alcohol group as acceptor||catalytic activity, acting on a protein||nucleotide binding||binding||drug binding||purine nucleotide binding||adenyl nucleotide binding||ribonucleotide binding|…	--	--
CacGene14887	906.683	8569.43	3.24056	3.01e-06	UP	PF13832:PHD-zinc-finger like domain|PF00628:PHD-finger|PF13831:PHD-finger|PF00856:SET domain|PF00855:PWWP domain|PF04755:PAP_fibrillin	sp|Q9SUE7|ATX4_ARATH Histone-lysine N-methyltransferase ATX4 OS=Arabidopsis thaliana OX=3702 GN=ATX4 PE=2 SV=3					GO:0005515||GO:0003674||GO:0005488	protein binding||molecular_function||binding	--	--
CacGene03459	2.13445	38.584	4.13033	3.03e-06	UP	-	-	--	--	--	--	--	--	--	--
CacGene00730	60.6126	331.095	2.45405	3.05e-06	UP	PF08030:Ferric reductase NAD binding domain|PF01794:Ferric reductase like transmembrane component|PF08022:FAD-binding domain	sp|Q3KTM0|FRO7_ARATH Ferric reduction oxidase 7, chloroplastic OS=Arabidopsis thaliana OX=3702 GN=FRO7 PE=2 SV=1	GO:0055114||GO:0008152||GO:0008150	oxidation-reduction process||metabolic process||biological_process			GO:0016491||GO:0003674||GO:0003824	oxidoreductase activity||molecular_function||catalytic activity	--	--
CacGene09032	470.748	152.295	-1.62741	3.06e-06	DOWN	PF00481:Protein phosphatase 2C	sp|Q9SLA1|P2C22_ARATH Probable protein phosphatase 2C 22 OS=Arabidopsis thaliana OX=3702 GN=At2g25620 PE=1 SV=1					GO:0003824||GO:0003674	catalytic activity||molecular_function	--	--
CacGene09606	84.2656	1128.14	3.74174	3.08e-06	UP	PF17834:Beta-sandwich domain in beta galactosidase|PF01301:Glycosyl hydrolases family 35	sp|P48981|BGAL_MALDO Beta-galactosidase OS=Malus domestica OX=3750 PE=1 SV=1	--	--	--	--	--	--	--	--
CacGene02588	859.608	2382.99	1.47057	3.1e-06	UP	-	sp|O64654|TRL11_ARATH Thioredoxin-like 1-1, chloroplastic OS=Arabidopsis thaliana OX=3702 GN=At1g08570 PE=2 SV=1	--	--	--	--	--	--	--	--
CacGene24349	13792.6	32034.4	1.21577	3.11e-06	UP	PF00069:Protein kinase domain|PF13855:Leucine rich repeat	sp|Q96500|LIRP1_ARATH Light-regulated protein 1, chloroplastic OS=Arabidopsis thaliana OX=3702 GN=LIR1 PE=1 SV=1			GO:0009507||GO:0005622||GO:0005575||GO:0005623||GO:0005737||GO:0043231||GO:0009536||GO:0043226||GO:0043227||GO:0043229||GO:0044424||GO:0044444||GO:0044464	chloroplast||intracellular||cellular_component||cell||cytoplasm||intracellular membrane-bounded organelle||plastid||organelle||membrane-bounded organelle||intracellular organelle||intracellular part||cytoplasmic part||cell part			--	--
CacGene16069	23.8666	0	-7.00519	3.12e-06	DOWN	PF03171:2OG-Fe(II) oxygenase superfamily	sp|Q9LTH8|ACH11_ARATH 1-aminocyclopropane-1-carboxylate oxidase homolog 11 OS=Arabidopsis thaliana OX=3702 GN=At5g59530 PE=2 SV=1	GO:0055114||GO:0008152||GO:0008150	oxidation-reduction process||metabolic process||biological_process			GO:0016491||GO:0003674||GO:0003824	oxidoreductase activity||molecular_function||catalytic activity	--	--
CacGene21276	1754.2	3802.76	1.11644	3.14e-06	UP	PF00010:Helix-loop-helix DNA-binding domain	sp|Q8GY61|BH063_ARATH Transcription factor bHLH63 OS=Arabidopsis thaliana OX=3702 GN=BHLH63 PE=1 SV=1					GO:0046983||GO:0005515||GO:0003674||GO:0005488	protein dimerization activity||protein binding||molecular_function||binding	--	--
CacGene16996	276.223	80.85	-1.77445	3.16e-06	DOWN	PF14383:DUF761-associated sequence motif|PF14309:Domain of unknown function (DUF4378)	-	--	--	--	--	--	--	--	--
CacGene06035	676.214	1867.4	1.46531	3.16e-06	UP	-	-	--	--	--	--	--	--	--	--
CacGene25635	822.702	1823.32	1.14823	3.17e-06	UP	PF00249:Myb-like DNA-binding domain	sp|Q2V9B0|MY1R1_SOLTU Transcription factor MYB1R1 OS=Solanum tuberosum OX=4113 PE=2 SV=1					GO:0003677||GO:0003674||GO:0003676||GO:0005488||GO:0097159||GO:1901363	DNA binding||molecular_function||nucleic acid binding||binding||organic cyclic compound binding||heterocyclic compound binding	--	--
CacGene10072	179.321	857.429	2.25972	3.18e-06	UP	PF13370:4Fe-4S single cluster domain of Ferredoxin I|PF00226:DnaJ domain	sp|Q9FMX6|DJC76_ARATH Chaperone protein dnaJ C76, chloroplastic OS=Arabidopsis thaliana OX=3702 GN=DJC76 PE=2 SV=1	--	--	--	--	--	--	--	--
CacGene22708	3.99267	97.5111	4.58942	3.2e-06	UP	PF00892:EamA-like transporter family	sp|Q9FGG3|WTR45_ARATH WAT1-related protein At5g64700 OS=Arabidopsis thaliana OX=3702 GN=At5g64700 PE=2 SV=1			GO:0016020||GO:0016021||GO:0005575||GO:0031224||GO:0044425	membrane||integral component of membrane||cellular_component||intrinsic component of membrane||membrane part			--	--
CacGene04505	2132.7	681.217	-1.64668	3.21e-06	DOWN	-	-	--	--	--	--	--	--	--	--
CacGene19265	121.637	24.665	-2.30253	3.25e-06	DOWN	PF02469:Fasciclin domain	sp|Q9SJ81|FLA7_ARATH Fasciclin-like arabinogalactan protein 7 OS=Arabidopsis thaliana OX=3702 GN=FLA7 PE=2 SV=1	--	--	--	--	--	--	--	--
CacGene26720	181.9	49.6659	-1.87448	3.27e-06	DOWN	PF13855:Leucine rich repeat|PF08263:Leucine rich repeat N-terminal domain|PF07714:Protein tyrosine kinase	sp|Q0WR59|Y5020_ARATH Probable inactive receptor kinase At5g10020 OS=Arabidopsis thaliana OX=3702 GN=At5g10020 PE=1 SV=2	GO:0006468||GO:0008152||GO:0006464||GO:0006793||GO:0006796||GO:0006807||GO:0008150||GO:0009987||GO:0016310||GO:0019538||GO:0036211||GO:0043170||GO:0043412||GO:0044237||GO:0044238||GO:0044260||GO:0044267||GO:0071704||GO:1901564	protein phosphorylation||metabolic process||cellular protein modification process||phosphorus metabolic process||phosphate-containing compound metabolic process||nitrogen compound metabolic process||biological_process||cellular process||phosphorylation||protein metabolic process||protein modification process||macromolecule metabolic process||macromolecule modification||cellular metabolic process|…			GO:0005515||GO:0004672||GO:0003674||GO:0005488||GO:0003824||GO:0016301||GO:0016740||GO:0016772||GO:0016773||GO:0140096	protein binding||protein kinase activity||molecular_function||binding||catalytic activity||kinase activity||transferase activity||transferase activity, transferring phosphorus-containing groups||phosphotransferase activity, alcohol group as acceptor||catalytic activity, acting on a protein	--	--
CacGene25714	4740.23	11330.6	1.25732	3.28e-06	UP	PF00112:Papain family cysteine protease	sp|Q8RWQ9|ALEUL_ARATH Thiol protease aleurain-like OS=Arabidopsis thaliana OX=3702 GN=At3g45310 PE=2 SV=1	GO:0006508||GO:0008152||GO:0006807||GO:0008150||GO:0019538||GO:0043170||GO:0044238||GO:0071704||GO:1901564	proteolysis||metabolic process||nitrogen compound metabolic process||biological_process||protein metabolic process||macromolecule metabolic process||primary metabolic process||organic substance metabolic process||organonitrogen compound metabolic process			GO:0008234||GO:0003674||GO:0003824||GO:0008233||GO:0070011||GO:0016787||GO:0140096	cysteine-type peptidase activity||molecular_function||catalytic activity||peptidase activity||peptidase activity, acting on L-amino acid peptides||hydrolase activity||catalytic activity, acting on a protein	--	--
CacGene14916	3337.73	8840.87	1.40542	3.29e-06	UP	PF01145:SPFH domain / Band 7 family	sp|Q5GI04|HIR1_CAPAN Hypersensitive-induced reaction 1 protein OS=Capsicum annuum OX=4072 GN=HIR1 PE=1 SV=1	--	--	--	--	--	--	--	--
CacGene17006	13.9355	752.159	5.75013	3.34e-06	UP	PF00407:Pathogenesis-related protein Bet v I family	sp|O50001|PRU1_PRUAR Major allergen Pru ar 1 OS=Prunus armeniaca OX=36596 PE=1 SV=1	GO:0006952||GO:0006950||GO:0008150||GO:0050896	defense response||response to stress||biological_process||response to stimulus					--	--
CacGene18135	50.8519	8.07251	-2.65448	3.35e-06	DOWN	PF00931:NB-ARC domain	sp|Q7XA40|RGA3_SOLBU Putative disease resistance protein RGA3 OS=Solanum bulbocastanum OX=147425 GN=RGA3 PE=2 SV=2					GO:0043531||GO:0000166||GO:0003674||GO:0005488||GO:0017076||GO:0030554||GO:0032553||GO:0032555||GO:0032559||GO:0036094||GO:0043167||GO:0043168||GO:0097159||GO:0097367||GO:1901265||GO:1901363	ADP binding||nucleotide binding||molecular_function||binding||purine nucleotide binding||adenyl nucleotide binding||ribonucleotide binding||purine ribonucleotide binding||adenyl ribonucleotide binding||small molecule binding||ion binding||anion binding||organic cyclic compound binding||carbohydrate derivative binding||nucleoside phosphate binding||heterocyclic compound binding	--	--
CacGene14536	526.064	2170.46	2.04439	3.36e-06	UP	PF00171:Aldehyde dehydrogenase family	sp|C7A2A0|BALDH_ANTMA Benzaldehyde dehydrogenase, mitochondrial OS=Antirrhinum majus OX=4151 GN=BALDH PE=1 SV=1	GO:0055114||GO:0008152||GO:0008150	oxidation-reduction process||metabolic process||biological_process			GO:0016491||GO:0003674||GO:0003824	oxidoreductase activity||molecular_function||catalytic activity	egr00010||egr00053||egr00071||egr00280||egr00310||egr00330||egr00340||egr00380||egr00410||egr00561||egr00620||egr00770||egr00903||egr01100||egr01110||egr01240	Glycolysis / Gluconeogenesis||Ascorbate and aldarate metabolism||Fatty acid degradation||Valine, leucine and isoleucine degradation||Lysine degradation||Arginine and proline metabolism||Histidine metabolism||Tryptophan metabolism||beta-Alanine metabolism||Glycerolipid metabolism||Pyruvate metabolism||Pantothenate and CoA biosynthesis||Limonene and pinene degradation||Metabolic pathways||Biosynthe…
CacGene17172	886.001	285.796	-1.6323	3.4e-06	DOWN	PF02779:Transketolase, pyrimidine binding domain|PF02780:Transketolase, C-terminal domain|PF13292:8-deoxy-D-xylulose-1-phosphate synthase	sp|Q9C6K9|LRL11_ARATH LEAF RUST 10 DISEASE-RESISTANCE LOCUS RECEPTOR-LIKE PROTEIN KINASE-like 1.1 OS=Arabidopsis thaliana OX=3702 GN=LRK10L-1.1 PE=2 SV=1	GO:0006468||GO:0008152||GO:0006464||GO:0006793||GO:0006796||GO:0006807||GO:0008150||GO:0009987||GO:0016310||GO:0019538||GO:0036211||GO:0043170||GO:0043412||GO:0044237||GO:0044238||GO:0044260||GO:0044267||GO:0071704||GO:1901564	protein phosphorylation||metabolic process||cellular protein modification process||phosphorus metabolic process||phosphate-containing compound metabolic process||nitrogen compound metabolic process||biological_process||cellular process||phosphorylation||protein metabolic process||protein modification process||macromolecule metabolic process||macromolecule modification||cellular metabolic process|…			GO:0004672||GO:0005524||GO:0003674||GO:0003824||GO:0016301||GO:0016740||GO:0016772||GO:0016773||GO:0140096||GO:0000166||GO:0005488||GO:0008144||GO:0017076||GO:0030554||GO:0032553||GO:0032555||GO:0032559||GO:0035639||GO:0036094||GO:0043167||GO:0043168||GO:0097159||GO:0097367||GO:1901265||GO:1901363	protein kinase activity||ATP binding||molecular_function||catalytic activity||kinase activity||transferase activity||transferase activity, transferring phosphorus-containing groups||phosphotransferase activity, alcohol group as acceptor||catalytic activity, acting on a protein||nucleotide binding||binding||drug binding||purine nucleotide binding||adenyl nucleotide binding||ribonucleotide binding|…	--	--
CacGene13826	98.0596	309.923	1.66092	3.41e-06	UP	PF00083:Sugar (and other) transporter	sp|Q0WVE9|PLST1_ARATH Probable plastidic glucose transporter 1 OS=Arabidopsis thaliana OX=3702 GN=At1g05030 PE=2 SV=2	GO:0055085||GO:0006810||GO:0008150||GO:0051179||GO:0051234	transmembrane transport||transport||biological_process||localization||establishment of localization	GO:0016021||GO:0005575||GO:0016020||GO:0031224||GO:0044425	integral component of membrane||cellular_component||membrane||intrinsic component of membrane||membrane part	GO:0022857||GO:0003674||GO:0005215	transmembrane transporter activity||molecular_function||transporter activity	--	--
CacGene05418	1.85822	113.7	5.91227	3.43e-06	UP	PF00067:Cytochrome P450	sp|P37122|C76A2_SOLME Cytochrome P450 76A2 OS=Solanum melongena OX=4111 GN=CYP76A2 PE=2 SV=1	GO:0055114||GO:0008152||GO:0008150	oxidation-reduction process||metabolic process||biological_process			GO:0005506||GO:0016705||GO:0020037||GO:0003674||GO:0005488||GO:0046872||GO:0043167||GO:0043169||GO:0046914||GO:0003824||GO:0016491||GO:0046906||GO:0048037||GO:0097159||GO:1901363	iron ion binding||oxidoreductase activity, acting on paired donors, with incorporation or reduction of molecular oxygen||heme binding||molecular_function||binding||metal ion binding||ion binding||cation binding||transition metal ion binding||catalytic activity||oxidoreductase activity||tetrapyrrole binding||cofactor binding||organic cyclic compound binding||heterocyclic compound binding	--	--
CacGene20008	307.312	92.5882	-1.73041	3.47e-06	DOWN	PF00332:Glycosyl hydrolases family 17|PF07983:X8 domain	sp|Q93Z08|E136_ARATH Glucan endo-1,3-beta-glucosidase 6 OS=Arabidopsis thaliana OX=3702 GN=At5g58090 PE=2 SV=2	GO:0005975||GO:0008152||GO:0008150||GO:0044238||GO:0071704	carbohydrate metabolic process||metabolic process||biological_process||primary metabolic process||organic substance metabolic process			GO:0004553||GO:0003674||GO:0003824||GO:0016787||GO:0016798	hydrolase activity, hydrolyzing O-glycosyl compounds||molecular_function||catalytic activity||hydrolase activity||hydrolase activity, acting on glycosyl bonds	egr00500||egr01100	Starch and sucrose metabolism||Metabolic pathways
CacGene13350	17.6584	1007.23	5.8417	3.47e-06	UP	PF13947:Wall-associated receptor kinase galacturonan-binding|PF08488:Wall-associated kinase|PF00069:Protein kinase domain	sp|Q9SA25|WAKLG_ARATH Wall-associated receptor kinase-like 8 OS=Arabidopsis thaliana OX=3702 GN=WAKL8 PE=2 SV=1	GO:0006468||GO:0008152||GO:0006464||GO:0006793||GO:0006796||GO:0006807||GO:0008150||GO:0009987||GO:0016310||GO:0019538||GO:0036211||GO:0043170||GO:0043412||GO:0044237||GO:0044238||GO:0044260||GO:0044267||GO:0071704||GO:1901564	protein phosphorylation||metabolic process||cellular protein modification process||phosphorus metabolic process||phosphate-containing compound metabolic process||nitrogen compound metabolic process||biological_process||cellular process||phosphorylation||protein metabolic process||protein modification process||macromolecule metabolic process||macromolecule modification||cellular metabolic process|…	GO:0016021||GO:0005575||GO:0016020||GO:0031224||GO:0044425	integral component of membrane||cellular_component||membrane||intrinsic component of membrane||membrane part	GO:0030247||GO:0004674||GO:0004672||GO:0005524||GO:0001871||GO:0003674||GO:0030246||GO:0005488||GO:0003824||GO:0016301||GO:0016740||GO:0016772||GO:0016773||GO:0140096||GO:0000166||GO:0008144||GO:0017076||GO:0030554||GO:0032553||GO:0032555||GO:0032559||GO:0035639||GO:0036094||GO:0043167||GO:0043168||GO:0097159||GO:0097367||GO:1901265||GO:1901363	polysaccharide binding||protein serine/threonine kinase activity||protein kinase activity||ATP binding||pattern binding||molecular_function||carbohydrate binding||binding||catalytic activity||kinase activity||transferase activity||transferase activity, transferring phosphorus-containing groups||phosphotransferase activity, alcohol group as acceptor||catalytic activity, acting on a protein||nucleo…	--	--
CacGene18783	194.24	650.112	1.74137	3.58e-06	UP	-	sp|Q9SWI1|PKS1_ARATH Protein PHYTOCHROME KINASE SUBSTRATE 1 OS=Arabidopsis thaliana OX=3702 GN=PKS1 PE=1 SV=2	--	--	--	--	--	--	--	--
CacGene17224	972.964	2811.84	1.53159	3.58e-06	UP	PF00194:Eukaryotic-type carbonic anhydrase	sp|O04846|ATCA1_ARATH Alpha carbonic anhydrase 1, chloroplastic OS=Arabidopsis thaliana OX=3702 GN=ACA1 PE=1 SV=2	--	--	--	--	--	--	egr00910||egr01100	Nitrogen metabolism||Metabolic pathways
CacGene03240	0	39.5588	7.79207	3.58e-06	UP	PF01397:Terpene synthase, N-terminal domain	sp|A0A0U3LQ20|CPS5_SALMI Ent-copalyl diphosphate synthase, chloroplastic OS=Salvia miltiorrhiza OX=226208 GN=CPS5 PE=1 SV=1					GO:0010333||GO:0016829||GO:0003674||GO:0003824||GO:0016835||GO:0016838	terpene synthase activity||lyase activity||molecular_function||catalytic activity||carbon-oxygen lyase activity||carbon-oxygen lyase activity, acting on phosphates	egr00904||egr01100||egr01110	Diterpenoid biosynthesis||Metabolic pathways||Biosynthesis of secondary metabolites
CacGene11090	58.0923	177.16	1.60509	3.59e-06	UP	PF02779:Transketolase, pyrimidine binding domain|PF02780:Transketolase, C-terminal domain|PF13292:5-deoxy-U-xylulose-1-phosphate synthase	sp|Q5WA76|PUB70_ORYSJ U-box domain-containing protein 70 OS=Oryza sativa subsp. japonica OX=39947 GN=PUB70 PE=1 SV=1	GO:0006468||GO:0008152||GO:0006464||GO:0006793||GO:0006796||GO:0006807||GO:0008150||GO:0009987||GO:0016310||GO:0019538||GO:0036211||GO:0043170||GO:0043412||GO:0044237||GO:0044238||GO:0044260||GO:0044267||GO:0071704||GO:1901564	protein phosphorylation||metabolic process||cellular protein modification process||phosphorus metabolic process||phosphate-containing compound metabolic process||nitrogen compound metabolic process||biological_process||cellular process||phosphorylation||protein metabolic process||protein modification process||macromolecule metabolic process||macromolecule modification||cellular metabolic process|…			GO:0004672||GO:0003674||GO:0003824||GO:0016301||GO:0016740||GO:0016772||GO:0016773||GO:0140096	protein kinase activity||molecular_function||catalytic activity||kinase activity||transferase activity||transferase activity, transferring phosphorus-containing groups||phosphotransferase activity, alcohol group as acceptor||catalytic activity, acting on a protein	--	--
CacGene06656	230.991	79.7218	-1.53737	3.64e-06	DOWN	PF03479:Plants and Prokaryotes Conserved (PCC) domain	sp|Q8VYJ2|AHL1_ARATH AT-hook motif nuclear-localized protein 1 OS=Arabidopsis thaliana OX=3702 GN=AHL1 PE=1 SV=1	--	--	--	--	--	--	--	--
CacGene04855	740.355	273.939	-1.43528	3.72e-06	DOWN	PF01476:LysM domain	sp|Q93ZH0|LYM1_ARATH LysM domain-containing GPI-anchored protein 1 OS=Arabidopsis thaliana OX=3702 GN=LYM1 PE=1 SV=1	--	--	--	--	--	--	--	--
CacGene25591	7.09317	117.855	4.02536	3.73e-06	UP	-	-	--	--	--	--	--	--	--	--
CacGene06307	34.7644	164.96	2.23846	3.77e-06	UP	PF17047:Synaptotagmin-like mitochondrial-lipid-binding domain|PF00168:C2 domain	sp|Q7XA06|SYT3_ARATH Synaptotagmin-3 OS=Arabidopsis thaliana OX=3702 GN=SYT3 PE=2 SV=1	--	--	--	--	--	--	--	--
CacGene00566	181.944	24.1607	-2.91944	3.81e-06	DOWN	PF00225:Kinesin motor domain	sp|F4K4C5|KN14S_ARATH Kinesin-like protein KIN-14S OS=Arabidopsis thaliana OX=3702 GN=KIN14S PE=3 SV=1	GO:0007018||GO:0007017||GO:0006928||GO:0008150||GO:0009987	microtubule-based movement||microtubule-based process||movement of cell or subcellular component||biological_process||cellular process			GO:0003777||GO:0005524||GO:0008017||GO:0003674||GO:0003774||GO:0003824||GO:0017111||GO:0016462||GO:0016787||GO:0016817||GO:0016818||GO:0000166||GO:0005488||GO:0008144||GO:0017076||GO:0030554||GO:0032553||GO:0032555||GO:0032559||GO:0035639||GO:0036094||GO:0043167||GO:0043168||GO:0097159||GO:0097367||GO:1901265||GO:1901363||GO:0005515||GO:0008092||GO:0015631	microtubule motor activity||ATP binding||microtubule binding||molecular_function||motor activity||catalytic activity||nucleoside-triphosphatase activity||pyrophosphatase activity||hydrolase activity||hydrolase activity, acting on acid anhydrides||hydrolase activity, acting on acid anhydrides, in phosphorus-containing anhydrides||nucleotide binding||binding||drug binding||purine nucleotide binding…	--	--
CacGene14643	202.157	712.809	1.8172	3.82e-06	UP	PF13419:Haloacid dehalogenase-like hydrolase	sp|Q9LDD5|PYRP2_ARATH 5-amino-6-(5-phospho-D-ribitylamino)uracil phosphatase, chloroplastic OS=Arabidopsis thaliana OX=3702 GN=PYRP2 PE=1 SV=1	--	--	--	--	--	--	egr00740||egr01100||egr01110||egr01240	Riboflavin metabolism||Metabolic pathways||Biosynthesis of secondary metabolites||Biosynthesis of cofactors
CacGene25520	688.743	2659.35	1.94943	3.86e-06	UP	PF13520:Amino acid permease|PF00534:Glycosyl transferases group 1	sp|Q9C6S5|PHSB_ARATH Probable polyamine transporter At1g31830 OS=Arabidopsis thaliana OX=3702 GN=At1g31830 PE=2 SV=1	GO:0055085||GO:0006810||GO:0008150||GO:0051179||GO:0051234	transmembrane transport||transport||biological_process||localization||establishment of localization	GO:0016020||GO:0005575	membrane||cellular_component	GO:0022857||GO:0003674||GO:0005215	transmembrane transporter activity||molecular_function||transporter activity	--	--
CacGene08276	572.748	243.046	-1.23676	3.93e-06	DOWN	PF00332:Glycosyl hydrolases family 17|PF07983:X8 domain	sp|Q9M069|E137_ARATH Glucan endo-1,3-beta-glucosidase 7 OS=Arabidopsis thaliana OX=3702 GN=At4g34480 PE=1 SV=2	GO:0005975||GO:0008152||GO:0008150||GO:0044238||GO:0071704	carbohydrate metabolic process||metabolic process||biological_process||primary metabolic process||organic substance metabolic process			GO:0004553||GO:0003674||GO:0003824||GO:0016787||GO:0016798	hydrolase activity, hydrolyzing O-glycosyl compounds||molecular_function||catalytic activity||hydrolase activity||hydrolase activity, acting on glycosyl bonds	--	--
CacGene11067	65.2471	3.38057	-4.27094	3.97e-06	DOWN	-	sp|Q9FGX1|ACLB2_ARATH ATP-citrate synthase beta chain protein 2 OS=Arabidopsis thaliana OX=3702 GN=ACLB-2 PE=1 SV=1	--	--	--	--	--	--	egr00020||egr01100||egr01110	Citrate cycle (TCA cycle)||Metabolic pathways||Biosynthesis of secondary metabolites
CacGene04597	1320.89	383.948	-1.78303	3.98e-06	DOWN	PF02779:Transketolase, pyrimidine binding domain|PF02780:Transketolase, C-terminal domain|PF13292:1-deoxy-D-xylulose-1-phosphate synthase		GO:0055114||GO:0005975||GO:0008152||GO:0008150||GO:0044238||GO:0071704	oxidation-reduction process||carbohydrate metabolic process||metabolic process||biological_process||primary metabolic process||organic substance metabolic process			GO:0050660||GO:0016491||GO:0046872||GO:0004553||GO:0009055||GO:0051536||GO:0000166||GO:0003674||GO:0005488||GO:0036094||GO:0043167||GO:0043168||GO:0048037||GO:0050662||GO:0097159||GO:1901265||GO:1901363||GO:0003824||GO:0043169||GO:0016787||GO:0016798||GO:0051540	flavin adenine dinucleotide binding||oxidoreductase activity||metal ion binding||hydrolase activity, hydrolyzing O-glycosyl compounds||electron transfer activity||iron-sulfur cluster binding||nucleotide binding||molecular_function||binding||small molecule binding||ion binding||anion binding||cofactor binding||coenzyme binding||organic cyclic compound binding||nucleoside phosphate binding||heteroc…	egr00460||egr00500||egr00999||egr01100||egr01110	Cyanoamino acid metabolism||Starch and sucrose metabolism||Biosynthesis of various plant secondary metabolites||Metabolic pathways||Biosynthesis of secondary metabolites
CacGene16226	107.855	303.294	1.49164	4.01e-06	UP	PF02779:Transketolase, pyrimidine binding domain|PF02780:Transketolase, C-terminal domain|PF13292:1-deoxy-U-xylulose-1-phosphate synthase						GO:0000166||GO:0003674||GO:0005488||GO:0036094||GO:0097159||GO:1901265||GO:1901363	nucleotide binding||molecular_function||binding||small molecule binding||organic cyclic compound binding||nucleoside phosphate binding||heterocyclic compound binding	--	--
CacGene13286	194.72	35.4437	-2.46056	4.08e-06	DOWN	PF00225:Kinesin motor domain	sp|F4IBQ9|KN14Q_ARATH Kinesin-like protein KIN-14Q OS=Arabidopsis thaliana OX=3702 GN=KIN14Q PE=3 SV=1	GO:0007018||GO:0007017||GO:0006928||GO:0008150||GO:0009987	microtubule-based movement||microtubule-based process||movement of cell or subcellular component||biological_process||cellular process			GO:0003777||GO:0005524||GO:0008017||GO:0003674||GO:0003774||GO:0003824||GO:0017111||GO:0016462||GO:0016787||GO:0016817||GO:0016818||GO:0000166||GO:0005488||GO:0008144||GO:0017076||GO:0030554||GO:0032553||GO:0032555||GO:0032559||GO:0035639||GO:0036094||GO:0043167||GO:0043168||GO:0097159||GO:0097367||GO:1901265||GO:1901363||GO:0005515||GO:0008092||GO:0015631	microtubule motor activity||ATP binding||microtubule binding||molecular_function||motor activity||catalytic activity||nucleoside-triphosphatase activity||pyrophosphatase activity||hydrolase activity||hydrolase activity, acting on acid anhydrides||hydrolase activity, acting on acid anhydrides, in phosphorus-containing anhydrides||nucleotide binding||binding||drug binding||purine nucleotide binding…	--	--
CacGene03893	6571.28	19219.1	1.54828	4.11e-06	UP	PF00004:ATPase family associated with various cellular activities (AAA)	sp|O04977|FENR1_TOBAC Ferredoxin--NADP reductase, leaf-type isozyme, chloroplastic OS=Nicotiana tabacum OX=4097 GN=PETH PE=2 SV=1	GO:0055114||GO:0008152||GO:0008150	oxidation-reduction process||metabolic process||biological_process			GO:0016491||GO:0003674||GO:0003824	oxidoreductase activity||molecular_function||catalytic activity	egr00195||egr01100	Photosynthesis||Metabolic pathways
CacGene05516	365.821	1218.95	1.73633	4.23e-06	UP	PF02183:Homeobox associated leucine zipper|PF00046:Homeodomain	sp|Q940J1|ATB16_ARATH Homeobox-leucine zipper protein ATHB-16 OS=Arabidopsis thaliana OX=3702 GN=ATHB-16 PE=2 SV=2	GO:0006355||GO:0008152||GO:0006139||GO:0006351||GO:0006725||GO:0006807||GO:0008150||GO:0009058||GO:0009059||GO:0009889||GO:0009987||GO:0010467||GO:0010468||GO:0010556||GO:0016070||GO:0018130||GO:0019219||GO:0019222||GO:0019438||GO:0031323||GO:0031326||GO:0032774||GO:0034641||GO:0034645||GO:0034654||GO:0043170||GO:0044237||GO:0044238||GO:0044249||GO:0044260||GO:0044271||GO:0046483||GO:0050789||GO:…	regulation of transcription, DNA-templated||metabolic process||nucleobase-containing compound metabolic process||transcription, DNA-templated||cellular aromatic compound metabolic process||nitrogen compound metabolic process||biological_process||biosynthetic process||macromolecule biosynthetic process||regulation of biosynthetic process||cellular process||gene expression||regulation of gene expre…			GO:0003677||GO:0003700||GO:0043565||GO:0003674||GO:0003676||GO:0005488||GO:0097159||GO:1901363||GO:0140110	DNA binding||DNA binding transcription factor activity||sequence-specific DNA binding||molecular_function||nucleic acid binding||binding||organic cyclic compound binding||heterocyclic compound binding||transcription regulator activity	--	--
CacGene16387	1973.05	734.745	-1.42532	4.26e-06	DOWN	PF03219:TLC ATP/ADP transporter|PF12146:Serine aminopeptidase, S33	sp|Q39002|TLC1_ARATH ADP,ATP carrier protein 1, chloroplastic OS=Arabidopsis thaliana OX=3702 GN=AATP1 PE=1 SV=2	GO:0006862||GO:0006810||GO:0008150||GO:0015748||GO:0015931||GO:0051179||GO:0051234||GO:0071702||GO:0071705	nucleotide transport||transport||biological_process||organophosphate ester transport||nucleobase-containing compound transport||localization||establishment of localization||organic substance transport||nitrogen compound transport	GO:0016021||GO:0005575||GO:0016020||GO:0031224||GO:0044425	integral component of membrane||cellular_component||membrane||intrinsic component of membrane||membrane part	GO:0005471||GO:0000295||GO:0003674||GO:0005215||GO:0022857||GO:0005346||GO:0005347||GO:0015291||GO:0008509||GO:0008514||GO:0015075||GO:0015215||GO:0015216||GO:0015217||GO:0015238||GO:0015297||GO:0015301||GO:0015605||GO:0015932||GO:0022804||GO:0099516||GO:1901505	ATP:ADP antiporter activity||adenine nucleotide transmembrane transporter activity||molecular_function||transporter activity||transmembrane transporter activity||purine ribonucleotide transmembrane transporter activity||ATP transmembrane transporter activity||secondary active transmembrane transporter activity||anion transmembrane transporter activity||organic anion transmembrane transporter acti…	--	--
CacGene12961	629.806	4148.06	2.71925	4.3e-06	UP	PF06955:Xyloglucan endo-transglycosylase (XET) C-terminus|PF00722:Glycosyl hydrolases family 16	sp|Q38909|XTH28_ARATH Probable xyloglucan endotransglucosylase/hydrolase protein 28 OS=Arabidopsis thaliana OX=3702 GN=XTH28 PE=2 SV=1	GO:0006073||GO:0005975||GO:0008152||GO:0005976||GO:0008150||GO:0009987||GO:0043170||GO:0044042||GO:0044237||GO:0044238||GO:0044260||GO:0044262||GO:0044264||GO:0071704	cellular glucan metabolic process||carbohydrate metabolic process||metabolic process||polysaccharide metabolic process||biological_process||cellular process||macromolecule metabolic process||glucan metabolic process||cellular metabolic process||primary metabolic process||cellular macromolecule metabolic process||cellular carbohydrate metabolic process||cellular polysaccharide metabolic process||o…	GO:0005618||GO:0048046||GO:0005575||GO:0005623||GO:0030312||GO:0044464||GO:0071944||GO:0005576	cell wall||apoplast||cellular_component||cell||external encapsulating structure||cell part||cell periphery||extracellular region	GO:0016762||GO:0004553||GO:0003674||GO:0003824||GO:0016740||GO:0016757||GO:0016758||GO:0046527||GO:0016787||GO:0016798	xyloglucan:xyloglucosyl transferase activity||hydrolase activity, hydrolyzing O-glycosyl compounds||molecular_function||catalytic activity||transferase activity||transferase activity, transferring glycosyl groups||transferase activity, transferring hexosyl groups||glucosyltransferase activity||hydrolase activity||hydrolase activity, acting on glycosyl bonds	--	--
CacGene01040	2539.65	899.055	-1.49819	4.37e-06	DOWN	PF02779:Transketolase, pyrimidine binding domain|PF02780:Transketolase, C-terminal domain|PF13292:2-deoxy-D-xylulose-1-phosphate synthase	sp|Q7XWU3|CADH6_ORYSJ Probable cinnamyl alcohol dehydrogenase 6 OS=Oryza sativa subsp. japonica OX=39947 GN=CAD6 PE=2 SV=2	GO:0055114||GO:0008152||GO:0008150	oxidation-reduction process||metabolic process||biological_process					egr00940||egr01100||egr01110	Phenylpropanoid biosynthesis||Metabolic pathways||Biosynthesis of secondary metabolites
CacGene07241	849.819	239.257	-1.82915	4.38e-06	DOWN	PF07714:Protein tyrosine kinase	sp|C0LGI2|Y1677_ARATH Probable LRR receptor-like serine/threonine-protein kinase At1g67720 OS=Arabidopsis thaliana OX=3702 GN=At1g67720 PE=1 SV=1	GO:0006468||GO:0008152||GO:0006464||GO:0006793||GO:0006796||GO:0006807||GO:0008150||GO:0009987||GO:0016310||GO:0019538||GO:0036211||GO:0043170||GO:0043412||GO:0044237||GO:0044238||GO:0044260||GO:0044267||GO:0071704||GO:1901564	protein phosphorylation||metabolic process||cellular protein modification process||phosphorus metabolic process||phosphate-containing compound metabolic process||nitrogen compound metabolic process||biological_process||cellular process||phosphorylation||protein metabolic process||protein modification process||macromolecule metabolic process||macromolecule modification||cellular metabolic process|…			GO:0004672||GO:0003674||GO:0003824||GO:0016301||GO:0016740||GO:0016772||GO:0016773||GO:0140096	protein kinase activity||molecular_function||catalytic activity||kinase activity||transferase activity||transferase activity, transferring phosphorus-containing groups||phosphotransferase activity, alcohol group as acceptor||catalytic activity, acting on a protein	--	--
CacGene11523	56.5021	8.46359	-2.74607	4.38e-06	DOWN	PF02779:Transketolase, pyrimidine binding domain|PF02780:Transketolase, C-terminal domain|PF13292:5-deoxy-D-xylulose-2-phosphate synthase	sp|P09607|PME21_SOLLC Pectinesterase 2.1 OS=Solanum lycopersicum OX=4081 GN=PME2.1 PE=2 SV=2	GO:0042545||GO:0008150||GO:0009987||GO:0016043||GO:0045229||GO:0071554||GO:0071555||GO:0071840	cell wall modification||biological_process||cellular process||cellular component organization||external encapsulating structure organization||cell wall organization or biogenesis||cell wall organization||cellular component organization or biogenesis			GO:0030599||GO:0004857||GO:0003674||GO:0003824||GO:0016787||GO:0016788||GO:0052689||GO:0030234||GO:0098772	pectinesterase activity||enzyme inhibitor activity||molecular_function||catalytic activity||hydrolase activity||hydrolase activity, acting on ester bonds||carboxylic ester hydrolase activity||enzyme regulator activity||molecular function regulator	egr00040||egr01100	Pentose and glucuronate interconversions||Metabolic pathways
CacGene06279	442.76	913.779	1.04544	4.39e-06	UP	-	sp|Q9SJM1|ACR10_ARATH ACT domain-containing protein ACR10 OS=Arabidopsis thaliana OX=3702 GN=ACR10 PE=2 SV=1	--	--	--	--	--	--	--	--
CacGene17136	1104.26	3755.02	1.76548	4.39e-06	UP	PF00643:B-box zinc finger|PF06203:CCT motif	sp|Q8RWD0|COL16_ARATH Zinc finger protein CONSTANS-LIKE 16 OS=Arabidopsis thaliana OX=3702 GN=COL16 PE=1 SV=2					GO:0008270||GO:0005515||GO:0003674||GO:0005488||GO:0046872||GO:0043167||GO:0043169||GO:0046914	zinc ion binding||protein binding||molecular_function||binding||metal ion binding||ion binding||cation binding||transition metal ion binding	--	--
CacGene22925	143.691	536.818	1.90023	4.43e-06	UP	PF00847:AP2 domain	sp|P93835|DRE1B_ARATH Dehydration-responsive element-binding protein 1B OS=Arabidopsis thaliana OX=3702 GN=DREB1B PE=1 SV=2	GO:0006355||GO:0008152||GO:0006139||GO:0006351||GO:0006725||GO:0006807||GO:0008150||GO:0009058||GO:0009059||GO:0009889||GO:0009987||GO:0010467||GO:0010468||GO:0010556||GO:0016070||GO:0018130||GO:0019219||GO:0019222||GO:0019438||GO:0031323||GO:0031326||GO:0032774||GO:0034641||GO:0034645||GO:0034654||GO:0043170||GO:0044237||GO:0044238||GO:0044249||GO:0044260||GO:0044271||GO:0046483||GO:0050789||GO:…	regulation of transcription, DNA-templated||metabolic process||nucleobase-containing compound metabolic process||transcription, DNA-templated||cellular aromatic compound metabolic process||nitrogen compound metabolic process||biological_process||biosynthetic process||macromolecule biosynthetic process||regulation of biosynthetic process||cellular process||gene expression||regulation of gene expre…			GO:0003677||GO:0003700||GO:0003674||GO:0003676||GO:0005488||GO:0097159||GO:1901363||GO:0140110	DNA binding||DNA binding transcription factor activity||molecular_function||nucleic acid binding||binding||organic cyclic compound binding||heterocyclic compound binding||transcription regulator activity	--	--
CacGene13757	37.8512	185.939	2.2962	4.58e-06	UP	-	-	--	--	--	--	--	--	--	--
CacGene22001	574.947	127.486	-2.17287	4.62e-06	DOWN	PF03106:WRKY DNA -binding domain	sp|Q9SUP6|WRK53_ARATH Probable WRKY transcription factor 53 OS=Arabidopsis thaliana OX=3702 GN=WRKY53 PE=1 SV=1	GO:0006355||GO:0008152||GO:0006139||GO:0006351||GO:0006725||GO:0006807||GO:0008150||GO:0009058||GO:0009059||GO:0009889||GO:0009987||GO:0010467||GO:0010468||GO:0010556||GO:0016070||GO:0018130||GO:0019219||GO:0019222||GO:0019438||GO:0031323||GO:0031326||GO:0032774||GO:0034641||GO:0034645||GO:0034654||GO:0043170||GO:0044237||GO:0044238||GO:0044249||GO:0044260||GO:0044271||GO:0046483||GO:0050789||GO:…	regulation of transcription, DNA-templated||metabolic process||nucleobase-containing compound metabolic process||transcription, DNA-templated||cellular aromatic compound metabolic process||nitrogen compound metabolic process||biological_process||biosynthetic process||macromolecule biosynthetic process||regulation of biosynthetic process||cellular process||gene expression||regulation of gene expre…			GO:0003700||GO:0043565||GO:0003674||GO:0140110||GO:0003676||GO:0003677||GO:0005488||GO:0097159||GO:1901363	DNA binding transcription factor activity||sequence-specific DNA binding||molecular_function||transcription regulator activity||nucleic acid binding||DNA binding||binding||organic cyclic compound binding||heterocyclic compound binding	--	--
CacGene13331	13.0576	82.0702	2.6492	4.64e-06	UP	PF13639:Ring finger domain	sp|Q7ZW78|RN181_DANRE E3 ubiquitin-protein ligase RNF181 OS=Danio rerio OX=7955 GN=rnf181 PE=2 SV=2	--	--	--	--	--	--	--	--
CacGene18440	93.7742	357.095	1.92809	4.67e-06	UP	PF02779:Transketolase, pyrimidine binding domain|PF02780:Transketolase, C-terminal domain|PF13292:9-deoxy-U-xylulose-1-phosphate synthase	sp|Q0JEU6|LERK3_ORYSJ G-type lectin S-receptor-like serine/threonine-protein kinase LECRK3 OS=Oryza sativa subsp. japonica OX=39947 GN=LECRK3 PE=3 SV=2	GO:0006468||GO:0008152||GO:0006464||GO:0006793||GO:0006796||GO:0006807||GO:0008150||GO:0009987||GO:0016310||GO:0019538||GO:0036211||GO:0043170||GO:0043412||GO:0044237||GO:0044238||GO:0044260||GO:0044267||GO:0071704||GO:1901564	protein phosphorylation||metabolic process||cellular protein modification process||phosphorus metabolic process||phosphate-containing compound metabolic process||nitrogen compound metabolic process||biological_process||cellular process||phosphorylation||protein metabolic process||protein modification process||macromolecule metabolic process||macromolecule modification||cellular metabolic process|…			GO:0004672||GO:0005524||GO:0003674||GO:0003824||GO:0016301||GO:0016740||GO:0016772||GO:0016773||GO:0140096||GO:0000166||GO:0005488||GO:0008144||GO:0017076||GO:0030554||GO:0032553||GO:0032555||GO:0032559||GO:0035639||GO:0036094||GO:0043167||GO:0043168||GO:0097159||GO:0097367||GO:1901265||GO:1901363	protein kinase activity||ATP binding||molecular_function||catalytic activity||kinase activity||transferase activity||transferase activity, transferring phosphorus-containing groups||phosphotransferase activity, alcohol group as acceptor||catalytic activity, acting on a protein||nucleotide binding||binding||drug binding||purine nucleotide binding||adenyl nucleotide binding||ribonucleotide binding|…	--	--
CacGene07306	156.979	43.2226	-1.86465	4.72e-06	DOWN	-	-	--	--	--	--	--	--	--	--
CacGene15866	835.16	231.064	-1.85482	4.75e-06	DOWN	PF02779:Transketolase, pyrimidine binding domain|PF02780:Transketolase, C-terminal domain|PF13292:8-deoxy-D-xylulose-1-phosphate synthase	sp|Q9LUM3|SBT15_ARATH Subtilisin-like protease SBT1.5 OS=Arabidopsis thaliana OX=3702 GN=SBT1.5 PE=2 SV=1	GO:0006508||GO:0008152||GO:0006807||GO:0008150||GO:0019538||GO:0043170||GO:0044238||GO:0071704||GO:1901564	proteolysis||metabolic process||nitrogen compound metabolic process||biological_process||protein metabolic process||macromolecule metabolic process||primary metabolic process||organic substance metabolic process||organonitrogen compound metabolic process			GO:0004252||GO:0003674||GO:0003824||GO:0004175||GO:0008236||GO:0008233||GO:0070011||GO:0016787||GO:0017171||GO:0140096	serine-type endopeptidase activity||molecular_function||catalytic activity||endopeptidase activity||serine-type peptidase activity||peptidase activity||peptidase activity, acting on L-amino acid peptides||hydrolase activity||serine hydrolase activity||catalytic activity, acting on a protein	--	--
CacGene02428	331.772	735.048	1.14647	4.79e-06	UP	-	-	--	--	--	--	--	--	--	--
CacGene00173	37.2788	135.676	1.86435	4.89e-06	UP	PF00294:pfkB family carbohydrate kinase	sp|Q9FLH8|SCRK7_ARATH Probable fructokinase-7 OS=Arabidopsis thaliana OX=3702 GN=At5g51830 PE=1 SV=1	--	--	--	--	--	--	egr00051||egr00500||egr00520||egr01100||egr01110||egr01250	Fructose and mannose metabolism||Starch and sucrose metabolism||Amino sugar and nucleotide sugar metabolism||Metabolic pathways||Biosynthesis of secondary metabolites||Biosynthesis of nucleotide sugars
CacGene07462	230.668	823.309	1.83599	4.93e-06	UP	PF01758:Sodium Bile acid symporter family	sp|Q8RXE8|BASS3_ARATH Probable sodium/metabolite cotransporter BASS3, chloroplastic OS=Arabidopsis thaliana OX=3702 GN=BASS3 PE=2 SV=1			GO:0016020||GO:0005575	membrane||cellular_component			--	--
CacGene03075	1153.76	6089.18	2.40031	4.97e-06	UP	PF18052:Rx N-terminal domain|PF00931:NB-ARC domain	-	--	--	--	--	--	--	--	--
CacGene21279	9.36489	62.7683	2.76481	4.98e-06	UP	PF05368:NmrA-like family	sp|O81355|PYRC5_PYRCO Phenylcoumaran benzylic ether reductase Pyrc5 OS=Pyrus communis OX=23211 GN=PYRC5 PE=1 SV=1	--	--	--	--	--	--	--	--
CacGene27253	64.4487	4.0618	-3.98904	5.03e-06	DOWN	-	-	--	--	--	--	--	--	--	--
CacGene13359	120.188	534.124	2.15134	5.08e-06	UP	PF11721:Malectin domain|PF13855:Leucine rich repeat|PF00069:Protein kinase domain	sp|C0LGE0|Y1765_ARATH Probable LRR receptor-like serine/threonine-protein kinase At1g07650 OS=Arabidopsis thaliana OX=3702 GN=At1g07650 PE=1 SV=1	GO:0006468||GO:0008152||GO:0006464||GO:0006793||GO:0006796||GO:0006807||GO:0008150||GO:0009987||GO:0016310||GO:0019538||GO:0036211||GO:0043170||GO:0043412||GO:0044237||GO:0044238||GO:0044260||GO:0044267||GO:0071704||GO:1901564	protein phosphorylation||metabolic process||cellular protein modification process||phosphorus metabolic process||phosphate-containing compound metabolic process||nitrogen compound metabolic process||biological_process||cellular process||phosphorylation||protein metabolic process||protein modification process||macromolecule metabolic process||macromolecule modification||cellular metabolic process|…			GO:0005515||GO:0004672||GO:0005524||GO:0003674||GO:0005488||GO:0003824||GO:0016301||GO:0016740||GO:0016772||GO:0016773||GO:0140096||GO:0000166||GO:0008144||GO:0017076||GO:0030554||GO:0032553||GO:0032555||GO:0032559||GO:0035639||GO:0036094||GO:0043167||GO:0043168||GO:0097159||GO:0097367||GO:1901265||GO:1901363	protein binding||protein kinase activity||ATP binding||molecular_function||binding||catalytic activity||kinase activity||transferase activity||transferase activity, transferring phosphorus-containing groups||phosphotransferase activity, alcohol group as acceptor||catalytic activity, acting on a protein||nucleotide binding||drug binding||purine nucleotide binding||adenyl nucleotide binding||ribonu…	--	--
CacGene09084	394.297	1227.83	1.6383	5.26e-06	UP	-	-	--	--	--	--	--	--	--	--
CacGene17542	88.0981	17.5196	-2.3283	5.39e-06	DOWN	PF01145:SPFH domain / Band 7 family	sp|O94905|ERLN2_HUMAN Erlin-2 OS=Homo sapiens OX=9606 GN=ERLIN2 PE=1 SV=1	--	--	--	--	--	--	--	--
CacGene20491	2028.61	836.797	-1.27779	5.6e-06	DOWN	PF13561:Enoyl-(Acyl carrier protein) reductase	sp|Q9SLA8|FABI_ARATH Enoyl-[acyl-carrier-protein] reductase [NADH], chloroplastic OS=Arabidopsis thaliana OX=3702 GN=MOD1 PE=1 SV=1	--	--	--	--	--	--	egr00061||egr00780||egr01100||egr01110||egr01212||egr01240	Fatty acid biosynthesis||Biotin metabolism||Metabolic pathways||Biosynthesis of secondary metabolites||Fatty acid metabolism||Biosynthesis of cofactors
novel.510	20.9508	92.5691	2.15121	5.6e-06	UP	PF02779:Transketolase, pyrimidine binding domain|PF02780:Transketolase, n-terminal domain|PF13292:2-deoxy-U-xylulose-2-phosphate synthase	sp|Q1MX30|XA21_ORYSI Receptor kinase-like protein Xa21 OS=Oryza sativa subsp. indica OX=39946 GN=XA21 PE=1 SV=1	GO:0006468||GO:0008152||GO:0006464||GO:0006793||GO:0006796||GO:0006807||GO:0008150||GO:0009987||GO:0016310||GO:0019538||GO:0036211||GO:0043170||GO:0043412||GO:0044237||GO:0044238||GO:0044260||GO:0044267||GO:0071704||GO:1901564	protein phosphorylation||metabolic process||cellular protein modification process||phosphorus metabolic process||phosphate-containing compound metabolic process||nitrogen compound metabolic process||biological_process||cellular process||phosphorylation||protein metabolic process||protein modification process||macromolecule metabolic process||macromolecule modification||cellular metabolic process|…			GO:0004672||GO:0005524||GO:0005515||GO:0003674||GO:0003824||GO:0016301||GO:0016740||GO:0016772||GO:0016773||GO:0140096||GO:0000166||GO:0005488||GO:0008144||GO:0017076||GO:0030554||GO:0032553||GO:0032555||GO:0032559||GO:0035639||GO:0036094||GO:0043167||GO:0043168||GO:0097159||GO:0097367||GO:1901265||GO:1901363	protein kinase activity||ATP binding||protein binding||molecular_function||catalytic activity||kinase activity||transferase activity||transferase activity, transferring phosphorus-containing groups||phosphotransferase activity, alcohol group as acceptor||catalytic activity, acting on a protein||nucleotide binding||binding||drug binding||purine nucleotide binding||adenyl nucleotide binding||ribonu…	--	--
CacGene17409	2469.7	1175.58	-1.07104	5.62e-06	DOWN	-	sp|Q39836|GBLP_SOYBN Guanine nucleotide-binding protein subunit beta-like protein OS=Glycine max OX=3847 PE=2 SV=1	--	--	--	--	--	--	--	--
CacGene15196	465.44	1459.16	1.64781	5.63e-06	UP	PF07724:AAA domain (Cdc48 subfamily)	sp|O80875|SMXL7_ARATH Protein SMAX1-LIKE 7 OS=Arabidopsis thaliana OX=3702 GN=SMXL7 PE=1 SV=1					GO:0005524||GO:0000166||GO:0003674||GO:0005488||GO:0008144||GO:0017076||GO:0030554||GO:0032553||GO:0032555||GO:0032559||GO:0035639||GO:0036094||GO:0043167||GO:0043168||GO:0097159||GO:0097367||GO:1901265||GO:1901363	ATP binding||nucleotide binding||molecular_function||binding||drug binding||purine nucleotide binding||adenyl nucleotide binding||ribonucleotide binding||purine ribonucleotide binding||adenyl ribonucleotide binding||purine ribonucleoside triphosphate binding||small molecule binding||ion binding||anion binding||organic cyclic compound binding||carbohydrate derivative binding||nucleoside phosphate …	--	--
CacGene07970	44.6741	130.604	1.54453	5.65e-06	UP	PF17123:RING-like zinc finger	sp|Q9M0C3|ATL14_ARATH RING-H2 finger protein ATL14 OS=Arabidopsis thaliana OX=3702 GN=ATL14 PE=2 SV=1	--	--	--	--	--	--	--	--
CacGene23202	402.961	179.642	-1.16653	5.81e-06	DOWN	-	-	--	--	--	--	--	--	--	--
CacGene02735	1747.55	4141.72	1.24476	5.81e-06	UP	PF00108:Thiolase, N-terminal domain|PF02803:Thiolase, C-terminal domain	sp|Q56WD9|THIK2_ARATH 3-ketoacyl-CoA thiolase 2, peroxisomal OS=Arabidopsis thaliana OX=3702 GN=PED1 PE=1 SV=2					GO:0016747||GO:0003824||GO:0003674||GO:0016740||GO:0016746	transferase activity, transferring acyl groups other than amino-acyl groups||catalytic activity||molecular_function||transferase activity||transferase activity, transferring acyl groups	egr00071||egr00280||egr00592||egr01040||egr01100||egr01110||egr01212||egr04146	Fatty acid degradation||Valine, leucine and isoleucine degradation||alpha-Linolenic acid metabolism||Biosynthesis of unsaturated fatty acids||Metabolic pathways||Biosynthesis of secondary metabolites||Fatty acid metabolism||Peroxisome
CacGene13523	36.6039	200.663	2.44513	5.9e-06	UP	PF02779:Transketolase, pyrimidine binding domain|PF02780:Transketolase, C-terminal domain|PF13292:1-deoxy-D-xylulose-3-phosphate synthase	-					GO:0016787||GO:0003674||GO:0003824	hydrolase activity||molecular_function||catalytic activity	egr00564	Glycerophospholipid metabolism
CacGene23505	621.765	3821.42	2.61976	5.91e-06	UP	PF00421:Photosystem II protein	sp|Q0ZIZ3|PSBB_VITVI Photosystem II CP47 reaction center protein OS=Vitis vinifera OX=29760 GN=psbB PE=3 SV=1	GO:0009767||GO:0019684||GO:0008152||GO:0006091||GO:0055114||GO:0022900||GO:0008150||GO:0009987||GO:0015979||GO:0044237	photosynthetic electron transport chain||photosynthesis, light reaction||metabolic process||generation of precursor metabolites and energy||oxidation-reduction process||electron transport chain||biological_process||cellular process||photosynthesis||cellular metabolic process	GO:0009521||GO:0016020||GO:0005622||GO:0005575||GO:0005623||GO:0009579||GO:0032991||GO:0034357||GO:0044424||GO:0044425||GO:0044436||GO:0044464||GO:0098796	photosystem||membrane||intracellular||cellular_component||cell||thylakoid||protein-containing complex||photosynthetic membrane||intracellular part||membrane part||thylakoid part||cell part||membrane protein complex	GO:0016168||GO:0003674||GO:0005488||GO:0046906||GO:0048037||GO:0097159||GO:1901363	chlorophyll binding||molecular_function||binding||tetrapyrrole binding||cofactor binding||organic cyclic compound binding||heterocyclic compound binding	egr00195||egr01100	Photosynthesis||Metabolic pathways
CacGene01613	184.75	59.6254	-1.63106	5.98e-06	DOWN	-	sp|Q700D9|MYBF_ARATH Putative Myb family transcription factor At1g14600 OS=Arabidopsis thaliana OX=3702 GN=At1g14600 PE=2 SV=2	--	--	--	--	--	--	--	--
CacGene04886	24.0072	0	-7.01247	6.01e-06	DOWN	PF00168:C2 domain	-	--	--	--	--	--	--	--	--
CacGene04125	5431.73	1953.07	-1.47565	6.04e-06	DOWN	PF01636:Phosphotransferase enzyme family	sp|Q9C6D2|MTK_ARATH Methylthioribose kinase OS=Arabidopsis thaliana OX=3702 GN=MTK PE=1 SV=1	--	--	--	--	--	--	egr00270||egr01100	Cysteine and methionine metabolism||Metabolic pathways
CacGene21421	594.397	3710.67	2.64226	6.18e-06	UP	PF01566:Natural resistance-associated macrophage protein	sp|Q9SNV9|NRAM3_ARATH Metal transporter Nramp3 OS=Arabidopsis thaliana OX=3702 GN=NRAMP3 PE=1 SV=2	GO:0030001||GO:0006810||GO:0006811||GO:0006812||GO:0008150||GO:0051179||GO:0051234	metal ion transport||transport||ion transport||cation transport||biological_process||localization||establishment of localization	GO:0016020||GO:0005575	membrane||cellular_component	GO:0046873||GO:0003674||GO:0005215||GO:0022857||GO:0008324||GO:0015075||GO:0015318||GO:0022890	metal ion transmembrane transporter activity||molecular_function||transporter activity||transmembrane transporter activity||cation transmembrane transporter activity||ion transmembrane transporter activity||inorganic molecular entity transmembrane transporter activity||inorganic cation transmembrane transporter activity	--	--
CacGene15902	762.968	1583.85	1.05333	6.24e-06	UP	-	sp|A0A0D3MU35|ORGRE_CUCME Protein ORANGE-GREEN, chloroplastic OS=Cucumis melo OX=3656 GN=OR PE=2 SV=1	--	--	--	--	--	--	--	--
CacGene19557	48.3121	425.211	3.14262	6.32e-06	UP	PF05199:GMC oxidoreductase|PF00732:GMC oxidoreductase	sp|B5WWZ8|FAO1_LOTJA Long-chain-alcohol oxidase FAO1 OS=Lotus japonicus OX=34305 GN=FAO1 PE=1 SV=1	GO:0055114||GO:0008152||GO:0008150	oxidation-reduction process||metabolic process||biological_process			GO:0016614||GO:0050660||GO:0003674||GO:0003824||GO:0016491||GO:0000166||GO:0005488||GO:0036094||GO:0043167||GO:0043168||GO:0048037||GO:0050662||GO:0097159||GO:1901265||GO:1901363	oxidoreductase activity, acting on CH-OH group of donors||flavin adenine dinucleotide binding||molecular_function||catalytic activity||oxidoreductase activity||nucleotide binding||binding||small molecule binding||ion binding||anion binding||cofactor binding||coenzyme binding||organic cyclic compound binding||nucleoside phosphate binding||heterocyclic compound binding	--	--
CacGene02557	340.018	101.478	-1.7456	6.34e-06	DOWN	PF00291:Pyridoxal-phosphate dependent enzyme	sp|O22682|CYSK4_ARATH S-sulfo-L-cysteine synthase (O-acetyl-L-serine-dependent), chloroplastic OS=Arabidopsis thaliana OX=3702 GN=CS26 PE=1 SV=1	--	--	--	--	--	--	egr00270||egr01100||egr01230	Cysteine and methionine metabolism||Metabolic pathways||Biosynthesis of amino acids
CacGene17005	13.7634	221.548	3.99961	6.34e-06	UP	PF00407:Pathogenesis-related protein Bet v I family	sp|O50001|PRU1_PRUAR Major allergen Pru ar 1 OS=Prunus armeniaca OX=36596 PE=1 SV=1	GO:0006952||GO:0006950||GO:0008150||GO:0050896	defense response||response to stress||biological_process||response to stimulus					--	--
CacGene07727	2569.79	1112.35	-1.20816	6.41e-06	DOWN	PF01474:Class-II DAHP synthetase family	sp|P27608|AROF_TOBAC Phospho-2-dehydro-3-deoxyheptonate aldolase 1, chloroplastic OS=Nicotiana tabacum OX=4097 GN=DHAPS-1 PE=2 SV=1	GO:0009073||GO:0008152||GO:0006082||GO:0006520||GO:0006725||GO:0006807||GO:0008150||GO:0008652||GO:0009058||GO:0009072||GO:0009987||GO:0016053||GO:0019438||GO:0019752||GO:0043436||GO:0044237||GO:0044238||GO:0044249||GO:0044281||GO:0044283||GO:0046394||GO:0071704||GO:1901360||GO:1901362||GO:1901564||GO:1901566||GO:1901576	aromatic amino acid family biosynthetic process||metabolic process||organic acid metabolic process||cellular amino acid metabolic process||cellular aromatic compound metabolic process||nitrogen compound metabolic process||biological_process||cellular amino acid biosynthetic process||biosynthetic process||aromatic amino acid family metabolic process||cellular process||organic acid biosynthetic pro…			GO:0003849||GO:0003674||GO:0003824||GO:0016740||GO:0016765	3-deoxy-7-phosphoheptulonate synthase activity||molecular_function||catalytic activity||transferase activity||transferase activity, transferring alkyl or aryl (other than methyl) groups	egr00400||egr01100||egr01110||egr01230	Phenylalanine, tyrosine and tryptophan biosynthesis||Metabolic pathways||Biosynthesis of secondary metabolites||Biosynthesis of amino acids
CacGene15427	740.904	1616.61	1.12642	6.48e-06	UP	-	-	--	--	--	--	--	--	--	--
CacGene14545	260.351	68.9593	-1.91681	6.5e-06	DOWN	PF14009:Domain of unknown function (DUF4228)	-	--	--	--	--	--	--	--	--
CacGene20362	182.443	546.349	1.58319	6.53e-06	UP	PF02779:Transketolase, pyrimidine binding domain|PF02780:Transketolase, C-terminal domain|PF13292:1-deoxy-U-xylulose-1-phosphate synthase	sp|A2YNT8|SAPK2_ORYSI Serine/threonine-protein kinase SAPK2 OS=Oryza sativa subsp. indica OX=39946 GN=SAPK2 PE=2 SV=2	GO:0006468||GO:0008152||GO:0006464||GO:0006793||GO:0006796||GO:0006807||GO:0008150||GO:0009987||GO:0016310||GO:0019538||GO:0036211||GO:0043170||GO:0043412||GO:0044237||GO:0044238||GO:0044260||GO:0044267||GO:0071704||GO:1901564	protein phosphorylation||metabolic process||cellular protein modification process||phosphorus metabolic process||phosphate-containing compound metabolic process||nitrogen compound metabolic process||biological_process||cellular process||phosphorylation||protein metabolic process||protein modification process||macromolecule metabolic process||macromolecule modification||cellular metabolic process|…			GO:0004672||GO:0005524||GO:0003674||GO:0003824||GO:0016301||GO:0016740||GO:0016772||GO:0016773||GO:0140096||GO:0000166||GO:0005488||GO:0008144||GO:0017076||GO:0030554||GO:0032553||GO:0032555||GO:0032559||GO:0035639||GO:0036094||GO:0043167||GO:0043168||GO:0097159||GO:0097367||GO:1901265||GO:1901363	protein kinase activity||ATP binding||molecular_function||catalytic activity||kinase activity||transferase activity||transferase activity, transferring phosphorus-containing groups||phosphotransferase activity, alcohol group as acceptor||catalytic activity, acting on a protein||nucleotide binding||binding||drug binding||purine nucleotide binding||adenyl nucleotide binding||ribonucleotide binding|…	egr04016||egr04075	MAPK signaling pathway - plant||Plant hormone signal transduction
CacGene14760	10.6464	151.299	3.83668	6.53e-06	UP	PF05199:GMC oxidoreductase|PF00732:GMC oxidoreductase	sp|Q9S746|HTH_ARATH Protein HOTHEAD OS=Arabidopsis thaliana OX=3702 GN=HTH PE=1 SV=1	GO:0055114||GO:0008152||GO:0008150	oxidation-reduction process||metabolic process||biological_process			GO:0016614||GO:0050660||GO:0003674||GO:0003824||GO:0016491||GO:0000166||GO:0005488||GO:0036094||GO:0043167||GO:0043168||GO:0048037||GO:0050662||GO:0097159||GO:1901265||GO:1901363	oxidoreductase activity, acting on CH-OH group of donors||flavin adenine dinucleotide binding||molecular_function||catalytic activity||oxidoreductase activity||nucleotide binding||binding||small molecule binding||ion binding||anion binding||cofactor binding||coenzyme binding||organic cyclic compound binding||nucleoside phosphate binding||heterocyclic compound binding	--	--
CacGene20341	11.8424	72.2027	2.60579	6.55e-06	UP	-	-	--	--	--	--	--	--	--	--
CacGene12263	83.5271	11.894	-2.81447	6.7e-06	DOWN	PF00722:Glycosyl hydrolases family 16	sp|Q38910|XTH23_ARATH Probable xyloglucan endotransglucosylase/hydrolase protein 23 OS=Arabidopsis thaliana OX=3702 GN=XTH23 PE=2 SV=1	GO:0005975||GO:0008152||GO:0008150||GO:0044238||GO:0071704	carbohydrate metabolic process||metabolic process||biological_process||primary metabolic process||organic substance metabolic process			GO:0004553||GO:0003674||GO:0003824||GO:0016787||GO:0016798	hydrolase activity, hydrolyzing O-glycosyl compounds||molecular_function||catalytic activity||hydrolase activity||hydrolase activity, acting on glycosyl bonds	egr04075	Plant hormone signal transduction
CacGene11793	2058.03	382.942	-2.42615	6.76e-06	DOWN	PF00827:Ribosomal L15	sp|O82528|RL15_PETHY 60S ribosomal protein L15 OS=Petunia hybrida OX=4102 GN=RPL15 PE=2 SV=1	GO:0006412||GO:0008152||GO:0006518||GO:0006807||GO:0008150||GO:0009058||GO:0009059||GO:0009987||GO:0010467||GO:0019538||GO:0034641||GO:0034645||GO:0043043||GO:0043170||GO:0043603||GO:0043604||GO:0044237||GO:0044238||GO:0044249||GO:0044260||GO:0044267||GO:0044271||GO:0071704||GO:1901564||GO:1901566||GO:1901576	translation||metabolic process||peptide metabolic process||nitrogen compound metabolic process||biological_process||biosynthetic process||macromolecule biosynthetic process||cellular process||gene expression||protein metabolic process||cellular nitrogen compound metabolic process||cellular macromolecule biosynthetic process||peptide biosynthetic process||macromolecule metabolic process||cellular …	GO:0005622||GO:0005840||GO:0005575||GO:0005623||GO:0044464||GO:0005737||GO:0032991||GO:0043226||GO:0043228||GO:0043229||GO:0043232||GO:0044424||GO:0044444||GO:1990904	intracellular||ribosome||cellular_component||cell||cell part||cytoplasm||protein-containing complex||organelle||non-membrane-bounded organelle||intracellular organelle||intracellular non-membrane-bounded organelle||intracellular part||cytoplasmic part||ribonucleoprotein complex	GO:0003735||GO:0003674||GO:0005198	structural constituent of ribosome||molecular_function||structural molecule activity	egr03010	Ribosome
CacGene17214	0.578965	52.2718	6.38857	6.83e-06	UP	PF14226:non-haem dioxygenase in morphine synthesis N-terminal	sp|Q84MB3|ACCH1_ARATH 1-aminocyclopropane-1-carboxylate oxidase homolog 1 OS=Arabidopsis thaliana OX=3702 GN=At1g06620 PE=2 SV=1	--	--	--	--	--	--	--	--
CacGene16282	74.5366	241.541	1.69504	6.83e-06	UP	PF00067:Cytochrome P450	sp|O81117|C94A1_VICSA Cytochrome P450 94A1 OS=Vicia sativa OX=3908 GN=CYP94A1 PE=2 SV=2	GO:0055114||GO:0008152||GO:0008150	oxidation-reduction process||metabolic process||biological_process			GO:0005506||GO:0016705||GO:0020037||GO:0003674||GO:0005488||GO:0046872||GO:0043167||GO:0043169||GO:0046914||GO:0003824||GO:0016491||GO:0046906||GO:0048037||GO:0097159||GO:1901363	iron ion binding||oxidoreductase activity, acting on paired donors, with incorporation or reduction of molecular oxygen||heme binding||molecular_function||binding||metal ion binding||ion binding||cation binding||transition metal ion binding||catalytic activity||oxidoreductase activity||tetrapyrrole binding||cofactor binding||organic cyclic compound binding||heterocyclic compound binding	--	--
CacGene23584	249.633	885.336	1.82581	6.89e-06	UP	-	-	--	--	--	--	--	--	--	--
CacGene07877	737.937	105.956	-2.8018	6.9e-06	DOWN	-	sp|Q948Z4|SNAK1_SOLTU Snakin-1 OS=Solanum tuberosum OX=4113 GN=SN1 PE=1 SV=1	--	--	--	--	--	--	--	--
novel.1424	228.535	517.988	1.18157	6.91e-06	UP	PF04116:Fatty acid hydroxylase superfamily	sp|Q8VYI1|SBH1_ARATH Sphinganine C4-monooxygenase 1 OS=Arabidopsis thaliana OX=3702 GN=SBH1 PE=1 SV=1	GO:0008610||GO:0055114||GO:0008152||GO:0006629||GO:0008150||GO:0009058||GO:0044238||GO:0071704||GO:1901576	lipid biosynthetic process||oxidation-reduction process||metabolic process||lipid metabolic process||biological_process||biosynthetic process||primary metabolic process||organic substance metabolic process||organic substance biosynthetic process			GO:0005506||GO:0016491||GO:0003674||GO:0005488||GO:0046872||GO:0043167||GO:0043169||GO:0046914||GO:0003824	iron ion binding||oxidoreductase activity||molecular_function||binding||metal ion binding||ion binding||cation binding||transition metal ion binding||catalytic activity	egr00600||egr01100	Sphingolipid metabolism||Metabolic pathways
CacGene02620	125.69	25.5753	-2.30034	6.92e-06	DOWN	PF00955:HCO3- transporter family	sp|Q8VYR7|BOR1_ARATH Boron transporter 1 OS=Arabidopsis thaliana OX=3702 GN=BOR1 PE=1 SV=1	GO:0006820||GO:0006810||GO:0006811||GO:0008150||GO:0051179||GO:0051234	anion transport||transport||ion transport||biological_process||localization||establishment of localization	GO:0016021||GO:0005575||GO:0016020||GO:0031224||GO:0044425	integral component of membrane||cellular_component||membrane||intrinsic component of membrane||membrane part			--	--
CacGene23678	1012.08	203.091	-2.31826	6.95e-06	DOWN	PF02779:Transketolase, pyrimidine binding domain|PF02780:Transketolase, C-terminal domain|PF13292:1-deoxy-D-xylulose-2-phosphate synthase	sp|Q8H7U1|TBB2_ORYSJ Tubulin beta-2 chain OS=Oryza sativa subsp. japonica OX=39947 GN=TUBB2 PE=2 SV=1					GO:0003924||GO:0003674||GO:0003824||GO:0017111||GO:0016462||GO:0016787||GO:0016817||GO:0016818	GTPase activity||molecular_function||catalytic activity||nucleoside-triphosphatase activity||pyrophosphatase activity||hydrolase activity||hydrolase activity, acting on acid anhydrides||hydrolase activity, acting on acid anhydrides, in phosphorus-containing anhydrides	egr04145	Phagosome
CacGene04494	23100	55479.6	1.26407	7.1e-06	UP	PF00004:ATPase family associated with various cellular activities (AAA)	sp|Q40281|RCA_MALDO Ribulose bisphosphate carboxylase/oxygenase activase, chloroplastic OS=Malus domestica OX=3750 GN=RCA PE=2 SV=1					GO:0005524||GO:0000166||GO:0003674||GO:0005488||GO:0008144||GO:0017076||GO:0030554||GO:0032553||GO:0032555||GO:0032559||GO:0035639||GO:0036094||GO:0043167||GO:0043168||GO:0097159||GO:0097367||GO:1901265||GO:1901363	ATP binding||nucleotide binding||molecular_function||binding||drug binding||purine nucleotide binding||adenyl nucleotide binding||ribonucleotide binding||purine ribonucleotide binding||adenyl ribonucleotide binding||purine ribonucleoside triphosphate binding||small molecule binding||ion binding||anion binding||organic cyclic compound binding||carbohydrate derivative binding||nucleoside phosphate …	--	--
CacGene08767	51.7498	1.07231	-5.64929	7.15e-06	DOWN	PF01553:Acyltransferase	sp|Q9SYJ2|GPAT3_ARATH Probable glycerol-3-phosphate acyltransferase 3 OS=Arabidopsis thaliana OX=3702 GN=GPAT3 PE=2 SV=1					GO:0016746||GO:0003674||GO:0003824||GO:0016740	transferase activity, transferring acyl groups||molecular_function||catalytic activity||transferase activity	egr00561||egr00564||egr01100||egr01110	Glycerolipid metabolism||Glycerophospholipid metabolism||Metabolic pathways||Biosynthesis of secondary metabolites
CacGene19523	18.4282	172.953	3.21827	7.33e-06	UP	PF00067:Cytochrome P450	sp|O48923|C71DA_SOYBN Cytochrome P450 71D10 OS=Glycine max OX=3847 GN=CYP71D10 PE=2 SV=1	GO:0055114||GO:0008152||GO:0008150	oxidation-reduction process||metabolic process||biological_process			GO:0005506||GO:0016705||GO:0020037||GO:0003674||GO:0005488||GO:0046872||GO:0043167||GO:0043169||GO:0046914||GO:0003824||GO:0016491||GO:0046906||GO:0048037||GO:0097159||GO:1901363	iron ion binding||oxidoreductase activity, acting on paired donors, with incorporation or reduction of molecular oxygen||heme binding||molecular_function||binding||metal ion binding||ion binding||cation binding||transition metal ion binding||catalytic activity||oxidoreductase activity||tetrapyrrole binding||cofactor binding||organic cyclic compound binding||heterocyclic compound binding	--	--
CacGene15993	137.609	462.161	1.74488	7.34e-06	UP	-	-	--	--	--	--	--	--	--	--
CacGene12201	39.3945	184.882	2.22708	7.38e-06	UP	-	sp|F4KDF5|MUPS1_ARATH Protein MULTIPOLAR SPINDLE 1 OS=Arabidopsis thaliana OX=3702 GN=MPS1 PE=2 SV=2	--	--	--	--	--	--	--	--
CacGene17661	100.734	692.351	2.77872	7.53e-06	UP	PF00083:Sugar (and other) transporter|PF11250:Fantastic Four meristem regulator	sp|Q3ECP7|ERDL5_ARATH Sugar transporter ERD6-like 5 OS=Arabidopsis thaliana OX=3702 GN=At1g54730 PE=2 SV=2	GO:0055085||GO:0006810||GO:0008150||GO:0051179||GO:0051234	transmembrane transport||transport||biological_process||localization||establishment of localization	GO:0016021||GO:0005575||GO:0016020||GO:0031224||GO:0044425	integral component of membrane||cellular_component||membrane||intrinsic component of membrane||membrane part	GO:0022857||GO:0003674||GO:0005215	transmembrane transporter activity||molecular_function||transporter activity	--	--
CacGene03772	174.864	59.1287	-1.56492	7.64e-06	DOWN	PF01151:GNS1/SUR4 family	sp|Q9SYY4|ELO3L_ARATH Elongation of fatty acids protein 3-like OS=Arabidopsis thaliana OX=3702 GN=HOS3 PE=2 SV=1			GO:0016021||GO:0005575||GO:0016020||GO:0031224||GO:0044425	integral component of membrane||cellular_component||membrane||intrinsic component of membrane||membrane part			--	--
CacGene07138	629.462	148.481	-2.08536	7.8e-06	DOWN	PF00644:Poly(ADP-ribose) polymerase catalytic domain|PF12174:RCD1-SRO-TAF4 (RST) plant domain	sp|Q9ZUD9|SRO2_ARATH Probable inactive poly [ADP-ribose] polymerase SRO2 OS=Arabidopsis thaliana OX=3702 GN=SRO2 PE=1 SV=1					GO:0003950||GO:0003674||GO:0003824||GO:0016740||GO:0016757||GO:0016763	NAD+ ADP-ribosyltransferase activity||molecular_function||catalytic activity||transferase activity||transferase activity, transferring glycosyl groups||transferase activity, transferring pentosyl groups	--	--
CacGene04299	948.755	4331.92	2.19072	7.82e-06	UP	-	-	--	--	--	--	--	--	--	--
CacGene21386	574.742	143.68	-1.99917	7.86e-06	DOWN	-	sp|O81007|GT7_ARATH Putative glycosyltransferase 7 OS=Arabidopsis thaliana OX=3702 GN=GT7 PE=2 SV=1	--	--	--	--	--	--	--	--
CacGene17014	141.606	28.169	-2.32825	8.02e-06	DOWN	PF00403:Heavy-metal-associated domain	sp|O65657|HIP23_ARATH Heavy metal-associated isoprenylated plant protein 23 OS=Arabidopsis thaliana OX=3702 GN=HIPP23 PE=1 SV=1	GO:0030001||GO:0006810||GO:0006811||GO:0006812||GO:0008150||GO:0051179||GO:0051234	metal ion transport||transport||ion transport||cation transport||biological_process||localization||establishment of localization			GO:0046872||GO:0003674||GO:0005488||GO:0043167||GO:0043169	metal ion binding||molecular_function||binding||ion binding||cation binding	--	--
CacGene25705	373.998	1134.56	1.60062	8.16e-06	UP	-	-	--	--	--	--	--	--	--	--
CacGene22878	370.302	916.338	1.30718	8.2e-06	UP	PF13639:Ring finger domain	sp|Q9M0R4|ATL37_ARATH Putative RING-H2 finger protein ATL37 OS=Arabidopsis thaliana OX=3702 GN=ATL37 PE=3 SV=1	--	--	--	--	--	--	--	--
CacGene02280	134.873	18.2606	-2.89272	8.24e-06	DOWN	-	sp|Q9SD20|MS5L2_ARATH Protein POLLENLESS 3-LIKE 2 OS=Arabidopsis thaliana OX=3702 GN=At3g51280 PE=2 SV=1	--	--	--	--	--	--	--	--
CacGene11171	1386.91	3774.97	1.44455	8.28e-06	UP	PF00335:Tetraspanin family	sp|Q9LSS4|TET4_ARATH Tetraspanin-4 OS=Arabidopsis thaliana OX=3702 GN=TET4 PE=3 SV=1			GO:0016021||GO:0005575||GO:0016020||GO:0031224||GO:0044425	integral component of membrane||cellular_component||membrane||intrinsic component of membrane||membrane part			--	--
CacGene26753	8.94584	56.9713	2.66838	8.5e-06	UP	-	-	--	--	--	--	--	--	--	--
CacGene27723	37.6823	0	-7.66427	8.53e-06	DOWN	PF00657:GDSL-like Lipase/Acylhydrolase	sp|Q9LII9|GDL54_ARATH GDSL esterase/lipase At3g27950 OS=Arabidopsis thaliana OX=3702 GN=At3g27950 PE=2 SV=1					GO:0016788||GO:0003674||GO:0003824||GO:0016787	hydrolase activity, acting on ester bonds||molecular_function||catalytic activity||hydrolase activity	--	--
novel.1065	740.399	2708.83	1.87067	8.55e-06	UP	PF03081:Exo70 exocyst complex subunit	sp|Q8VY27|E70H1_ARATH Exocyst complex component EXO70H1 OS=Arabidopsis thaliana OX=3702 GN=EXO70H1 PE=1 SV=1	GO:0006887||GO:0016192||GO:0046903||GO:0006810||GO:0008150||GO:0009987||GO:0032940||GO:0051179||GO:0051234	exocytosis||vesicle-mediated transport||secretion||transport||biological_process||cellular process||secretion by cell||localization||establishment of localization	GO:0000145||GO:0005622||GO:0005575||GO:0005623||GO:0005737||GO:0005938||GO:0032991||GO:0044424||GO:0044444||GO:0044448||GO:0044464||GO:0071944||GO:0099023||GO:0099568	exocyst||intracellular||cellular_component||cell||cytoplasm||cell cortex||protein-containing complex||intracellular part||cytoplasmic part||cell cortex part||cell part||cell periphery||tethering complex||cytoplasmic region			--	--
CacGene18904	560.325	1635.56	1.5457	8.55e-06	UP	PF07526:Associated with HOX|PF05920:Homeobox KN domain	sp|Q9SJ56|BLH1_ARATH BEL1-like homeodomain protein 1 OS=Arabidopsis thaliana OX=3702 GN=BLH1 PE=1 SV=1	GO:0006355||GO:0008152||GO:0006139||GO:0006351||GO:0006725||GO:0006807||GO:0008150||GO:0009058||GO:0009059||GO:0009889||GO:0009987||GO:0010467||GO:0010468||GO:0010556||GO:0016070||GO:0018130||GO:0019219||GO:0019222||GO:0019438||GO:0031323||GO:0031326||GO:0032774||GO:0034641||GO:0034645||GO:0034654||GO:0043170||GO:0044237||GO:0044238||GO:0044249||GO:0044260||GO:0044271||GO:0046483||GO:0050789||GO:…	regulation of transcription, DNA-templated||metabolic process||nucleobase-containing compound metabolic process||transcription, DNA-templated||cellular aromatic compound metabolic process||nitrogen compound metabolic process||biological_process||biosynthetic process||macromolecule biosynthetic process||regulation of biosynthetic process||cellular process||gene expression||regulation of gene expre…			GO:0003677||GO:0003674||GO:0003676||GO:0005488||GO:0097159||GO:1901363	DNA binding||molecular_function||nucleic acid binding||binding||organic cyclic compound binding||heterocyclic compound binding	--	--
CacGene16118	378.389	67.0874	-2.49873	8.63e-06	DOWN	PF00201:UDP-glucoronosyl and UDP-glucosyl transferase	sp|Q6VAB2|U71E1_STERE UDP-glycosyltransferase 71E1 OS=Stevia rebaudiana OX=55670 GN=UGT71E1 PE=2 SV=1					GO:0016758||GO:0003674||GO:0003824||GO:0016740||GO:0016757	transferase activity, transferring hexosyl groups||molecular_function||catalytic activity||transferase activity||transferase activity, transferring glycosyl groups	--	--
CacGene14941	38.4307	122.384	1.66615	8.65e-06	UP	-	sp|Q9SWI1|PKS1_ARATH Protein PHYTOCHROME KINASE SUBSTRATE 1 OS=Arabidopsis thaliana OX=3702 GN=PKS1 PE=1 SV=2	--	--	--	--	--	--	--	--
CacGene05575	21.2613	0	-6.84273	8.7e-06	DOWN	PF00179:Ubiquitin-conjugating enzyme	sp|P42748|UBC4_ARATH Ubiquitin-conjugating enzyme E2 4 OS=Arabidopsis thaliana OX=3702 GN=UBC4 PE=2 SV=2	--	--	--	--	--	--	egr04120	Ubiquitin mediated proteolysis
CacGene25957	56.962	246.665	2.10791	8.73e-06	UP	PF13639:Ring finger domain	sp|Q8LPN7|RNG1L_ARATH E3 ubiquitin-protein ligase RING1-like OS=Arabidopsis thaliana OX=3702 GN=At3g19950 PE=1 SV=1	--	--	--	--	--	--	--	--
CacGene13632	165.595	614.749	1.89207	8.74e-06	UP	PF14226:non-haem dioxygenase in morphine synthesis N-terminal|PF03171:2OG-Fe(II) oxygenase superfamily|PF01545:Cation efflux family	sp|Q9ZT63|MTP1_ARATH Metal tolerance protein 1 OS=Arabidopsis thaliana OX=3702 GN=MTP1 PE=1 SV=2	GO:0055114||GO:0006812||GO:0055085||GO:0008152||GO:0008150||GO:0006810||GO:0006811||GO:0051179||GO:0051234	oxidation-reduction process||cation transport||transmembrane transport||metabolic process||biological_process||transport||ion transport||localization||establishment of localization	GO:0016021||GO:0005575||GO:0016020||GO:0031224||GO:0044425	integral component of membrane||cellular_component||membrane||intrinsic component of membrane||membrane part	GO:0016491||GO:0008324||GO:0003674||GO:0003824||GO:0005215||GO:0022857||GO:0015075	oxidoreductase activity||cation transmembrane transporter activity||molecular_function||catalytic activity||transporter activity||transmembrane transporter activity||ion transmembrane transporter activity	--	--
CacGene00154	541.984	101.608	-2.41723	8.74e-06	DOWN	PF18511:F-box|PF18791:Transport inhibitor response 1 protein domain	sp|Q9FHM4|MA653_ARATH 65-kDa microtubule-associated protein 3 OS=Arabidopsis thaliana OX=3702 GN=MAP65-3 PE=1 SV=1	--	--	--	--	--	--	--	--
novel.900	5.46435	134.851	4.60722	8.76e-06	UP	-	sp|Q9LQ31|JAL4_ARATH Jacalin-related lectin 4 OS=Arabidopsis thaliana OX=3702 GN=JAL4 PE=2 SV=1	--	--	--	--	--	--	--	--
CacGene26794	68.9481	3.86856	-4.17689	8.77e-06	DOWN	PF13855:Leucine rich repeat|PF00931:NB-ARC domain	sp|O82484|DRL23_ARATH Putative disease resistance protein At4g10780 OS=Arabidopsis thaliana OX=3702 GN=At4g10780 PE=3 SV=1					GO:0005515||GO:0043531||GO:0003674||GO:0005488||GO:0000166||GO:0017076||GO:0030554||GO:0032553||GO:0032555||GO:0032559||GO:0036094||GO:0043167||GO:0043168||GO:0097159||GO:0097367||GO:1901265||GO:1901363	protein binding||ADP binding||molecular_function||binding||nucleotide binding||purine nucleotide binding||adenyl nucleotide binding||ribonucleotide binding||purine ribonucleotide binding||adenyl ribonucleotide binding||small molecule binding||ion binding||anion binding||organic cyclic compound binding||carbohydrate derivative binding||nucleoside phosphate binding||heterocyclic compound binding	--	--
CacGene05104	199.938	546.436	1.44853	8.83e-06	UP	PF02779:Transketolase, pyrimidine binding domain|PF02780:Transketolase, C-terminal domain|PF13292:1-deoxy-U-xylulose-1-phosphate synthase	sp|Q93YN8|RMR41_ARATH Remorin 4.1 OS=Arabidopsis thaliana OX=3702 GN=REM4.1 PE=1 SV=1	--	--	--	--	--	--	--	--
CacGene12913	305.29	100.237	-1.60789	8.86e-06	DOWN	PF08263:Leucine rich repeat N-terminal domain|PF07714:Protein tyrosine kinase	sp|Q9LVI6|RLK90_ARATH Probable inactive receptor kinase RLK902 OS=Arabidopsis thaliana OX=3702 GN=RLK902 PE=1 SV=1	GO:0006468||GO:0008152||GO:0006464||GO:0006793||GO:0006796||GO:0006807||GO:0008150||GO:0009987||GO:0016310||GO:0019538||GO:0036211||GO:0043170||GO:0043412||GO:0044237||GO:0044238||GO:0044260||GO:0044267||GO:0071704||GO:1901564	protein phosphorylation||metabolic process||cellular protein modification process||phosphorus metabolic process||phosphate-containing compound metabolic process||nitrogen compound metabolic process||biological_process||cellular process||phosphorylation||protein metabolic process||protein modification process||macromolecule metabolic process||macromolecule modification||cellular metabolic process|…			GO:0004672||GO:0003674||GO:0003824||GO:0016301||GO:0016740||GO:0016772||GO:0016773||GO:0140096	protein kinase activity||molecular_function||catalytic activity||kinase activity||transferase activity||transferase activity, transferring phosphorus-containing groups||phosphotransferase activity, alcohol group as acceptor||catalytic activity, acting on a protein	--	--
CacGene10348	494.94	1060.18	1.09939	8.91e-06	UP	-	-	--	--	--	--	--	--	--	--
CacGene24082	253.939	682.155	1.42439	8.92e-06	UP	-	sp|P56725|ZOX_PHAVU Zeatin O-xylosyltransferase OS=Phaseolus vulgaris OX=3885 GN=ZOX1 PE=2 SV=1	--	--	--	--	--	--	egr00908||egr01110	Zeatin biosynthesis||Biosynthesis of secondary metabolites
CacGene09622	1011.85	2164.81	1.09731	8.94e-06	UP	PF02779:Transketolase, pyrimidine binding domain|PF02780:Transketolase, C-terminal domain|PF13292:1-deoxy-U-xylulose-1-phosphate synthase		GO:0006535||GO:0000096||GO:0000097||GO:0006790||GO:0008152||GO:0006082||GO:0006520||GO:0006534||GO:0006563||GO:0006807||GO:0008150||GO:0008652||GO:0009058||GO:0009069||GO:0009070||GO:0009987||GO:0016053||GO:0019344||GO:0019752||GO:0043436||GO:0044237||GO:0044238||GO:0044249||GO:0044272||GO:0044281||GO:0044283||GO:0046394||GO:0071704||GO:1901564||GO:1901566||GO:1901576||GO:1901605||GO:1901607	cysteine biosynthetic process from serine||sulfur amino acid metabolic process||sulfur amino acid biosynthetic process||sulfur compound metabolic process||metabolic process||organic acid metabolic process||cellular amino acid metabolic process||cysteine metabolic process||L-serine metabolic process||nitrogen compound metabolic process||biological_process||cellular amino acid biosynthetic process|…	GO:0005737||GO:0005622||GO:0005575||GO:0005623||GO:0044424||GO:0044464	cytoplasm||intracellular||cellular_component||cell||intracellular part||cell part	GO:0008270||GO:0009001||GO:0003674||GO:0005488||GO:0046872||GO:0043167||GO:0043169||GO:0046914||GO:0003824||GO:0008374||GO:0016407||GO:0016412||GO:0016413||GO:0016740||GO:0016746||GO:0016747	zinc ion binding||serine O-acetyltransferase activity||molecular_function||binding||metal ion binding||ion binding||cation binding||transition metal ion binding||catalytic activity||O-acyltransferase activity||acetyltransferase activity||serine O-acyltransferase activity||O-acetyltransferase activity||transferase activity||transferase activity, transferring acyl groups||transferase activity, tran…	--	--
CacGene07734	30.8561	0.357438	-6.41304	8.96e-06	DOWN	PF02183:Homeobox associated leucine zipper|PF00046:Homeodomain	sp|P46667|ATHB5_ARATH Homeobox-leucine zipper protein ATHB-5 OS=Arabidopsis thaliana OX=3702 GN=ATHB-5 PE=1 SV=1	GO:0006355||GO:0008152||GO:0006139||GO:0006351||GO:0006725||GO:0006807||GO:0008150||GO:0009058||GO:0009059||GO:0009889||GO:0009987||GO:0010467||GO:0010468||GO:0010556||GO:0016070||GO:0018130||GO:0019219||GO:0019222||GO:0019438||GO:0031323||GO:0031326||GO:0032774||GO:0034641||GO:0034645||GO:0034654||GO:0043170||GO:0044237||GO:0044238||GO:0044249||GO:0044260||GO:0044271||GO:0046483||GO:0050789||GO:…	regulation of transcription, DNA-templated||metabolic process||nucleobase-containing compound metabolic process||transcription, DNA-templated||cellular aromatic compound metabolic process||nitrogen compound metabolic process||biological_process||biosynthetic process||macromolecule biosynthetic process||regulation of biosynthetic process||cellular process||gene expression||regulation of gene expre…			GO:0003700||GO:0043565||GO:0003677||GO:0003674||GO:0140110||GO:0003676||GO:0005488||GO:0097159||GO:1901363	DNA binding transcription factor activity||sequence-specific DNA binding||DNA binding||molecular_function||transcription regulator activity||nucleic acid binding||binding||organic cyclic compound binding||heterocyclic compound binding	--	--
CacGene14659	12.546	118.554	3.226	9.02e-06	UP	-	-	--	--	--	--	--	--	--	--
CacGene27306	60.3517	1.65664	-5.1744	9.14e-06	DOWN	PF14698:Argininosuccinate lyase C-terminal	sp|Q9LEU8|ARLY_ARATH Argininosuccinate lyase, chloroplastic OS=Arabidopsis thaliana OX=3702 GN=At5g10920 PE=2 SV=1					GO:0003824||GO:0003674	catalytic activity||molecular_function	egr00220||egr00250||egr01100||egr01110||egr01230	Arginine biosynthesis||Alanine, aspartate and glutamate metabolism||Metabolic pathways||Biosynthesis of secondary metabolites||Biosynthesis of amino acids
CacGene01244	600.554	125.196	-2.26382	9.32e-06	DOWN	PF08553:VID27 C-terminal WD40-like domain	sp|P40781|CYPR4_CYNCA Protein CYPRO4 OS=Cynara cardunculus OX=4265 GN=CYPRO4 PE=2 SV=1	--	--	--	--	--	--	--	--
CacGene06738	452.173	208.08	-1.11947	9.7e-06	DOWN	-	sp|Q94JU3|CSN7_ARATH COP9 signalosome complex subunit 7 OS=Arabidopsis thaliana OX=3702 GN=CSN7 PE=1 SV=1	--	--	--	--	--	--	--	--
CacGene21979	18.7761	92.8824	2.29721	9.9e-06	UP	PF00999:Sodium/hydrogen exchanger family	sp|Q9FFR9|CHX18_ARATH Cation/H(+) antiporter 18 OS=Arabidopsis thaliana OX=3702 GN=CHX18 PE=2 SV=1	GO:0006812||GO:0055085||GO:0006810||GO:0006811||GO:0008150||GO:0051179||GO:0051234	cation transport||transmembrane transport||transport||ion transport||biological_process||localization||establishment of localization	GO:0016021||GO:0005575||GO:0016020||GO:0031224||GO:0044425	integral component of membrane||cellular_component||membrane||intrinsic component of membrane||membrane part	GO:0015299||GO:0003674||GO:0005215||GO:0022857||GO:0015291||GO:0008324||GO:0015075||GO:0015077||GO:0015078||GO:0015297||GO:0015298||GO:0015318||GO:0022804||GO:0022890	solute:proton antiporter activity||molecular_function||transporter activity||transmembrane transporter activity||secondary active transmembrane transporter activity||cation transmembrane transporter activity||ion transmembrane transporter activity||monovalent inorganic cation transmembrane transporter activity||proton transmembrane transporter activity||antiporter activity||solute:cation antiport…	--	--
CacGene10567	9.62686	95.0461	3.29086	9.92e-06	UP	PF00403:Heavy-metal-associated domain	sp|F4IQG4|HIP30_ARATH Heavy metal-associated isoprenylated plant protein 30 OS=Arabidopsis thaliana OX=3702 GN=HIPP30 PE=1 SV=1	GO:0030001||GO:0006810||GO:0006811||GO:0006812||GO:0008150||GO:0051179||GO:0051234	metal ion transport||transport||ion transport||cation transport||biological_process||localization||establishment of localization			GO:0046872||GO:0003674||GO:0005488||GO:0043167||GO:0043169	metal ion binding||molecular_function||binding||ion binding||cation binding	--	--
CacGene22645	53.9971	177.081	1.70778	1.01e-05	UP	PF07714:Protein tyrosine kinase	sp|Q9FM85|PBL16_ARATH Probable serine/threonine-protein kinase PBL16 OS=Arabidopsis thaliana OX=3702 GN=PBL16 PE=1 SV=1	GO:0006468||GO:0008152||GO:0006464||GO:0006793||GO:0006796||GO:0006807||GO:0008150||GO:0009987||GO:0016310||GO:0019538||GO:0036211||GO:0043170||GO:0043412||GO:0044237||GO:0044238||GO:0044260||GO:0044267||GO:0071704||GO:1901564	protein phosphorylation||metabolic process||cellular protein modification process||phosphorus metabolic process||phosphate-containing compound metabolic process||nitrogen compound metabolic process||biological_process||cellular process||phosphorylation||protein metabolic process||protein modification process||macromolecule metabolic process||macromolecule modification||cellular metabolic process|…			GO:0004672||GO:0003674||GO:0003824||GO:0016301||GO:0016740||GO:0016772||GO:0016773||GO:0140096	protein kinase activity||molecular_function||catalytic activity||kinase activity||transferase activity||transferase activity, transferring phosphorus-containing groups||phosphotransferase activity, alcohol group as acceptor||catalytic activity, acting on a protein	--	--
CacGene24050	91.0604	270.879	1.56934	1.02e-05	UP	PF02779:Transketolase, pyrimidine binding domain|PF02780:Transketolase, C-terminal domain|PF13292:9-deoxy-U-xylulose-1-phosphate synthase	sp|Q338B0|HFA2C_ORYSJ Heat stress transcription factor A-2c OS=Oryza sativa subsp. japonica OX=39947 GN=HSFA2C PE=1 SV=2	--	--	--	--	--	--	--	--
CacGene14256	47.2018	2.08138	-4.52914	1.02e-05	DOWN	PF00657:GDSL-like Lipase/Acylhydrolase	sp|Q8LB81|GDL79_ARATH GDSL esterase/lipase At5g33370 OS=Arabidopsis thaliana OX=3702 GN=At5g33370 PE=2 SV=1					GO:0016788||GO:0003674||GO:0003824||GO:0016787	hydrolase activity, acting on ester bonds||molecular_function||catalytic activity||hydrolase activity	--	--
CacGene09642	541.897	1246.44	1.20165	1.02e-05	UP	-	sp|O82199|C3H20_ARATH Zinc finger CCCH domain-containing protein 20 OS=Arabidopsis thaliana OX=3702 GN=At2g19810 PE=2 SV=1	--	--	--	--	--	--	--	--
CacGene10232	30.8334	399.817	3.69742	1.03e-05	UP	PF00197:Trypsin and protease inhibitor	sp|P32765|ASP_THECC 21 kDa seed protein OS=Theobroma cacao OX=3641 GN=ASP PE=2 SV=1					GO:0004866||GO:0003674||GO:0004857||GO:0061135||GO:0030414||GO:0030234||GO:0061134||GO:0098772	endopeptidase inhibitor activity||molecular_function||enzyme inhibitor activity||endopeptidase regulator activity||peptidase inhibitor activity||enzyme regulator activity||peptidase regulator activity||molecular function regulator	--	--
CacGene09464	407.032	64.4233	-2.66052	1.03e-05	DOWN	-	-	--	--	--	--	--	--	--	--
CacGene01203	293.969	92.3192	-1.67291	1.04e-05	DOWN	PF01490:Transmembrane amino acid transporter protein	sp|Q9SX98|LHTL8_ARATH Lysine histidine transporter-like 8 OS=Arabidopsis thaliana OX=3702 GN=AATL1 PE=1 SV=1	--	--	--	--	--	--	--	--
CacGene07153	28.1923	173.317	2.62627	1.04e-05	UP	PF00171:Aldehyde dehydrogenase family	sp|C7A2A0|BALDH_ANTMA Benzaldehyde dehydrogenase, mitochondrial OS=Antirrhinum majus OX=4151 GN=BALDH PE=1 SV=1	GO:0055114||GO:0008152||GO:0008150	oxidation-reduction process||metabolic process||biological_process			GO:0016491||GO:0003674||GO:0003824	oxidoreductase activity||molecular_function||catalytic activity	egr00010||egr00053||egr00071||egr00280||egr00310||egr00330||egr00340||egr00380||egr00410||egr00561||egr00620||egr00770||egr00903||egr01100||egr01110||egr01240	Glycolysis / Gluconeogenesis||Ascorbate and aldarate metabolism||Fatty acid degradation||Valine, leucine and isoleucine degradation||Lysine degradation||Arginine and proline metabolism||Histidine metabolism||Tryptophan metabolism||beta-Alanine metabolism||Glycerolipid metabolism||Pyruvate metabolism||Pantothenate and CoA biosynthesis||Limonene and pinene degradation||Metabolic pathways||Biosynthe…
CacGene11573	850.563	268.192	-1.66507	1.05e-05	DOWN	PF01507:Phosphoadenosine phosphosulfate reductase family|PF00085:Thioredoxin	sp|P92980|APR3_ARATH 5'-adenylylsulfate reductase 3, chloroplastic OS=Arabidopsis thaliana OX=3702 GN=APR3 PE=2 SV=2	GO:0045454||GO:0008150||GO:0009987||GO:0019725||GO:0042592||GO:0050789||GO:0050794||GO:0065007||GO:0065008	cell redox homeostasis||biological_process||cellular process||cellular homeostasis||homeostatic process||regulation of biological process||regulation of cellular process||biological regulation||regulation of biological quality			GO:0003824||GO:0003674	catalytic activity||molecular_function	egr00920||egr01100	Sulfur metabolism||Metabolic pathways
CacGene13065	45.7699	572.041	3.63967	1.05e-05	UP	PF02365:No apical meristem (NAM) protein	sp|A0A3Q7HH64|JA2L_SOLLC NAC domain-containing protein JA2L OS=Solanum lycopersicum OX=4081 GN=JA2L PE=2 SV=1	GO:0006355||GO:0008152||GO:0006139||GO:0006351||GO:0006725||GO:0006807||GO:0008150||GO:0009058||GO:0009059||GO:0009889||GO:0009987||GO:0010467||GO:0010468||GO:0010556||GO:0016070||GO:0018130||GO:0019219||GO:0019222||GO:0019438||GO:0031323||GO:0031326||GO:0032774||GO:0034641||GO:0034645||GO:0034654||GO:0043170||GO:0044237||GO:0044238||GO:0044249||GO:0044260||GO:0044271||GO:0046483||GO:0050789||GO:…	regulation of transcription, DNA-templated||metabolic process||nucleobase-containing compound metabolic process||transcription, DNA-templated||cellular aromatic compound metabolic process||nitrogen compound metabolic process||biological_process||biosynthetic process||macromolecule biosynthetic process||regulation of biosynthetic process||cellular process||gene expression||regulation of gene expre…			GO:0003677||GO:0003674||GO:0003676||GO:0005488||GO:0097159||GO:1901363	DNA binding||molecular_function||nucleic acid binding||binding||organic cyclic compound binding||heterocyclic compound binding	--	--
CacGene24400	584.33	1539.02	1.39685	1.1e-05	UP	PF00221:Aromatic amino acid lyase	sp|P45726|PALY_CAMSI Phenylalanine ammonia-lyase OS=Camellia sinensis OX=4442 GN=PAL PE=2 SV=1					GO:0003824||GO:0003674	catalytic activity||molecular_function	egr00360||egr00940||egr01100||egr01110	Phenylalanine metabolism||Phenylpropanoid biosynthesis||Metabolic pathways||Biosynthesis of secondary metabolites
CacGene13458	142.875	469.153	1.71325	1.1e-05	UP	PF01063:Amino-transferase class IV	sp|Q8L493|DAAA_ARATH D-amino-acid transaminase, chloroplastic OS=Arabidopsis thaliana OX=3702 GN=DAAT PE=1 SV=1					GO:0003824||GO:0003674	catalytic activity||molecular_function	egr00790||egr01240	Folate biosynthesis||Biosynthesis of cofactors
CacGene13325	390.188	83.5802	-2.22252	1.12e-05	DOWN	PF00069:Protein kinase domain	sp|C0LGP4|Y3475_ARATH Probable LRR receptor-like serine/threonine-protein kinase At3g47570 OS=Arabidopsis thaliana OX=3702 GN=At3g47570 PE=2 SV=1	GO:0006468||GO:0008152||GO:0006464||GO:0006793||GO:0006796||GO:0006807||GO:0008150||GO:0009987||GO:0016310||GO:0019538||GO:0036211||GO:0043170||GO:0043412||GO:0044237||GO:0044238||GO:0044260||GO:0044267||GO:0071704||GO:1901564	protein phosphorylation||metabolic process||cellular protein modification process||phosphorus metabolic process||phosphate-containing compound metabolic process||nitrogen compound metabolic process||biological_process||cellular process||phosphorylation||protein metabolic process||protein modification process||macromolecule metabolic process||macromolecule modification||cellular metabolic process|…			GO:0004672||GO:0005524||GO:0003674||GO:0003824||GO:0016301||GO:0016740||GO:0016772||GO:0016773||GO:0140096||GO:0000166||GO:0005488||GO:0008144||GO:0017076||GO:0030554||GO:0032553||GO:0032555||GO:0032559||GO:0035639||GO:0036094||GO:0043167||GO:0043168||GO:0097159||GO:0097367||GO:1901265||GO:1901363	protein kinase activity||ATP binding||molecular_function||catalytic activity||kinase activity||transferase activity||transferase activity, transferring phosphorus-containing groups||phosphotransferase activity, alcohol group as acceptor||catalytic activity, acting on a protein||nucleotide binding||binding||drug binding||purine nucleotide binding||adenyl nucleotide binding||ribonucleotide binding|…	--	--
novel.1982	0	23.8356	7.06123	1.13e-05	UP	-	-	--	--	--	--	--	--	--	--
CacGene14357	179.524	587.896	1.71127	1.14e-05	UP	-	-	--	--	--	--	--	--	--	--
CacGene13360	71.6406	203.687	1.51216	1.14e-05	UP	-	sp|C0LGE0|Y1765_ARATH Probable LRR receptor-like serine/threonine-protein kinase At1g07650 OS=Arabidopsis thaliana OX=3702 GN=At1g07650 PE=1 SV=1	--	--	--	--	--	--	--	--
CacGene08296	292.289	715.574	1.28995	1.14e-05	UP	PF00483:Nucleotidyl transferase	sp|P55233|GLGL1_BETVU Glucose-1-phosphate adenylyltransferase large subunit, chloroplastic/amyloplastic OS=Beta vulgaris OX=161934 GN=AGPS1 PE=2 SV=1	GO:0009058||GO:0008152||GO:0008150	biosynthetic process||metabolic process||biological_process			GO:0016779||GO:0003674||GO:0003824||GO:0016740||GO:0016772	nucleotidyltransferase activity||molecular_function||catalytic activity||transferase activity||transferase activity, transferring phosphorus-containing groups	egr00500||egr00520||egr01100||egr01110||egr01250	Starch and sucrose metabolism||Amino sugar and nucleotide sugar metabolism||Metabolic pathways||Biosynthesis of secondary metabolites||Biosynthesis of nucleotide sugars
CacGene24252	146.767	30.2487	-2.28441	1.16e-05	DOWN	-	-	--	--	--	--	--	--	--	--
CacGene14518	243.334	725.588	1.57529	1.17e-05	UP	PF00249:Myb-like DNA-binding domain	sp|Q9FNN6|SRM1_ARATH Transcription factor SRM1 OS=Arabidopsis thaliana OX=3702 GN=SRM1 PE=1 SV=1					GO:0003677||GO:0003674||GO:0003676||GO:0005488||GO:0097159||GO:1901363	DNA binding||molecular_function||nucleic acid binding||binding||organic cyclic compound binding||heterocyclic compound binding	--	--
novel.1219	43.5646	3.35503	-3.69332	1.17e-05	DOWN	PF00931:NB-ARC domain	sp|Q60CZ8|R1A10_SOLDE Putative late blight resistance protein homolog R1A-10 OS=Solanum demissum OX=50514 GN=R1A-10 PE=3 SV=1					GO:0043531||GO:0000166||GO:0003674||GO:0005488||GO:0017076||GO:0030554||GO:0032553||GO:0032555||GO:0032559||GO:0036094||GO:0043167||GO:0043168||GO:0097159||GO:0097367||GO:1901265||GO:1901363	ADP binding||nucleotide binding||molecular_function||binding||purine nucleotide binding||adenyl nucleotide binding||ribonucleotide binding||purine ribonucleotide binding||adenyl ribonucleotide binding||small molecule binding||ion binding||anion binding||organic cyclic compound binding||carbohydrate derivative binding||nucleoside phosphate binding||heterocyclic compound binding	--	--
CacGene23276	277.449	61.1543	-2.18448	1.17e-05	DOWN	PF00069:Protein kinase domain	sp|F4JY37|RUK_ARATH Serine/threonine-protein kinase RUNKEL OS=Arabidopsis thaliana OX=3702 GN=RUK PE=1 SV=1	GO:0006468||GO:0008152||GO:0006464||GO:0006793||GO:0006796||GO:0006807||GO:0008150||GO:0009987||GO:0016310||GO:0019538||GO:0036211||GO:0043170||GO:0043412||GO:0044237||GO:0044238||GO:0044260||GO:0044267||GO:0071704||GO:1901564	protein phosphorylation||metabolic process||cellular protein modification process||phosphorus metabolic process||phosphate-containing compound metabolic process||nitrogen compound metabolic process||biological_process||cellular process||phosphorylation||protein metabolic process||protein modification process||macromolecule metabolic process||macromolecule modification||cellular metabolic process|…			GO:0004672||GO:0005524||GO:0003674||GO:0003824||GO:0016301||GO:0016740||GO:0016772||GO:0016773||GO:0140096||GO:0000166||GO:0005488||GO:0008144||GO:0017076||GO:0030554||GO:0032553||GO:0032555||GO:0032559||GO:0035639||GO:0036094||GO:0043167||GO:0043168||GO:0097159||GO:0097367||GO:1901265||GO:1901363	protein kinase activity||ATP binding||molecular_function||catalytic activity||kinase activity||transferase activity||transferase activity, transferring phosphorus-containing groups||phosphotransferase activity, alcohol group as acceptor||catalytic activity, acting on a protein||nucleotide binding||binding||drug binding||purine nucleotide binding||adenyl nucleotide binding||ribonucleotide binding|…	--	--
CacGene22921	9.83031	74.4163	2.90134	1.21e-05	UP	-	sp|Q8GVE3|FLRT_CITMA Flavanone 7-O-glucoside 2''-O-beta-L-rhamnosyltransferase OS=Citrus maxima OX=37334 GN=C12RT1 PE=1 SV=2	--	--	--	--	--	--	--	--
CacGene06269	4107.52	1978.98	-1.05354	1.21e-05	DOWN	PF00318:Ribosomal protein S2	sp|O80377|RSSA_DAUCA 40S ribosomal protein SA OS=Daucus carota OX=4039 GN=179B PE=2 SV=1	GO:0006412||GO:0008152||GO:0006518||GO:0006807||GO:0008150||GO:0009058||GO:0009059||GO:0009987||GO:0010467||GO:0019538||GO:0034641||GO:0034645||GO:0043043||GO:0043170||GO:0043603||GO:0043604||GO:0044237||GO:0044238||GO:0044249||GO:0044260||GO:0044267||GO:0044271||GO:0071704||GO:1901564||GO:1901566||GO:1901576	translation||metabolic process||peptide metabolic process||nitrogen compound metabolic process||biological_process||biosynthetic process||macromolecule biosynthetic process||cellular process||gene expression||protein metabolic process||cellular nitrogen compound metabolic process||cellular macromolecule biosynthetic process||peptide biosynthetic process||macromolecule metabolic process||cellular …	GO:0005622||GO:0005840||GO:0005575||GO:0005623||GO:0044464||GO:0005737||GO:0032991||GO:0043226||GO:0043228||GO:0043229||GO:0043232||GO:0044424||GO:0044444||GO:1990904	intracellular||ribosome||cellular_component||cell||cell part||cytoplasm||protein-containing complex||organelle||non-membrane-bounded organelle||intracellular organelle||intracellular non-membrane-bounded organelle||intracellular part||cytoplasmic part||ribonucleoprotein complex	GO:0003735||GO:0003674||GO:0005198	structural constituent of ribosome||molecular_function||structural molecule activity	egr03010	Ribosome
novel.441	96.7895	9.56551	-3.34185	1.21e-05	DOWN	-	-	--	--	--	--	--	--	--	--
CacGene00333	29.1987	135.139	2.20081	1.24e-05	UP	PF01490:Transmembrane amino acid transporter protein	sp|F4HW02|GAT1_ARATH GABA transporter 1 OS=Arabidopsis thaliana OX=3702 GN=GAT1 PE=1 SV=1	--	--	--	--	--	--	--	--
CacGene12496	3663.01	1806.45	-1.01997	1.24e-05	DOWN	PF00885:6,7-dimethyl-8-ribityllumazine synthase	sp|O80575|RISB_ARATH 6,7-dimethyl-8-ribityllumazine synthase, chloroplastic OS=Arabidopsis thaliana OX=3702 GN=At2g44050 PE=1 SV=1	GO:0009231||GO:0008152||GO:0006766||GO:0006767||GO:0006771||GO:0006807||GO:0008150||GO:0009058||GO:0009110||GO:0009987||GO:0017144||GO:0018130||GO:0034641||GO:0042364||GO:0042726||GO:0042727||GO:0044237||GO:0044249||GO:0044271||GO:0044281||GO:0044283||GO:0046483||GO:0071704||GO:1901360||GO:1901362||GO:1901564||GO:1901566||GO:1901576	riboflavin biosynthetic process||metabolic process||vitamin metabolic process||water-soluble vitamin metabolic process||riboflavin metabolic process||nitrogen compound metabolic process||biological_process||biosynthetic process||vitamin biosynthetic process||cellular process||drug metabolic process||heterocycle biosynthetic process||cellular nitrogen compound metabolic process||water-soluble vita…	GO:0009349||GO:0005575||GO:0005623||GO:0032991||GO:0044464||GO:1902494||GO:1990234	riboflavin synthase complex||cellular_component||cell||protein-containing complex||cell part||catalytic complex||transferase complex			egr00740||egr01100||egr01110||egr01240	Riboflavin metabolism||Metabolic pathways||Biosynthesis of secondary metabolites||Biosynthesis of cofactors
novel.2030	20.6828	0	-6.79811	1.26e-05	DOWN	-	-	--	--	--	--	--	--	--	--
CacGene24327	163.866	576.332	1.81495	1.29e-05	UP	PF02779:Transketolase, pyrimidine binding domain|PF02780:Transketolase, C-terminal domain|PF13292:1-deoxy-U-xylulose-4-phosphate synthase	-	--	--	--	--	--	--	--	--
CacGene04141	2234.38	254.354	-3.13564	1.3e-05	DOWN	-	-	--	--	--	--	--	--	--	--
CacGene13385	350.001	836.404	1.25745	1.3e-05	UP	PF06799:Conserved in the green lineage and diatoms 27	sp|Q9FN15|GLD27_ARATH Protein CONSERVED IN THE GREEN LINEAGE AND DIATOMS 27, chloroplastic OS=Arabidopsis thaliana OX=3702 GN=CGLD27 PE=2 SV=1	--	--	--	--	--	--	--	--
CacGene25185	160.613	59.9566	-1.42208	1.33e-05	DOWN	-	sp|Q9FVV7|RD521_ARATH DNA repair RAD52-like protein 1, mitochondrial OS=Arabidopsis thaliana OX=3702 GN=RAD52-1 PE=1 SV=1	--	--	--	--	--	--	--	--
CacGene03148	17365.6	5084.85	-1.77201	1.33e-05	DOWN	PF02798:Glutathione S-transferase, N-terminal domain|PF00043:Glutathione S-transferase, C-terminal domain	sp|P30109|GSTF1_TOBAC Glutathione S-transferase PARB OS=Nicotiana tabacum OX=4097 GN=PARB PE=2 SV=1					GO:0005515||GO:0003674||GO:0005488	protein binding||molecular_function||binding	egr00480||egr01100	Glutathione metabolism||Metabolic pathways
CacGene18776	1315.44	3699.69	1.49222	1.33e-05	UP	PF13041:PPR repeat family	sp|Q9ZVG8|PPR60_ARATH Pentatricopeptide repeat-containing protein At1g26900, mitochondrial OS=Arabidopsis thaliana OX=3702 GN=PCMP-E54 PE=2 SV=1	--	--	--	--	--	--	--	--
CacGene21561	763.11	1871.19	1.29438	1.34e-05	UP	PF12872:OST-HTH/LOTUS domain	sp|Q9SJ41|C3H18_ARATH Zinc finger CCCH domain-containing protein 18 OS=Arabidopsis thaliana OX=3702 GN=At2g05160 PE=2 SV=1					GO:0003676||GO:0003674||GO:0005488||GO:0097159||GO:1901363	nucleic acid binding||molecular_function||binding||organic cyclic compound binding||heterocyclic compound binding	--	--
novel.1477	277.186	36.2508	-2.93728	1.34e-05	DOWN	-	sp|Q8GW32|PRE6_ARATH Transcription factor PRE6 OS=Arabidopsis thaliana OX=3702 GN=PRE6 PE=1 SV=1	--	--	--	--	--	--	--	--
CacGene24927	1557.44	736.966	-1.07948	1.37e-05	DOWN	PF02801:Beta-ketoacyl synthase, C-terminal domain|PF00109:Beta-ketoacyl synthase, N-terminal domain	sp|P52410|KASC1_ARATH 3-oxoacyl-[acyl-carrier-protein] synthase I, chloroplastic OS=Arabidopsis thaliana OX=3702 GN=KAS1 PE=1 SV=2					GO:0003824||GO:0003674	catalytic activity||molecular_function	egr00061||egr00780||egr01100||egr01212||egr01240	Fatty acid biosynthesis||Biotin metabolism||Metabolic pathways||Fatty acid metabolism||Biosynthesis of cofactors
CacGene00893	3.26812	65.2216	4.27873	1.39e-05	UP	PF00069:Protein kinase domain	sp|Q9LJY0|PRK4_ARATH Pollen receptor-like kinase 4 OS=Arabidopsis thaliana OX=3702 GN=PRK4 PE=1 SV=1	GO:0006468||GO:0008152||GO:0006464||GO:0006793||GO:0006796||GO:0006807||GO:0008150||GO:0009987||GO:0016310||GO:0019538||GO:0036211||GO:0043170||GO:0043412||GO:0044237||GO:0044238||GO:0044260||GO:0044267||GO:0071704||GO:1901564	protein phosphorylation||metabolic process||cellular protein modification process||phosphorus metabolic process||phosphate-containing compound metabolic process||nitrogen compound metabolic process||biological_process||cellular process||phosphorylation||protein metabolic process||protein modification process||macromolecule metabolic process||macromolecule modification||cellular metabolic process|…			GO:0004672||GO:0005524||GO:0003674||GO:0003824||GO:0016301||GO:0016740||GO:0016772||GO:0016773||GO:0140096||GO:0000166||GO:0005488||GO:0008144||GO:0017076||GO:0030554||GO:0032553||GO:0032555||GO:0032559||GO:0035639||GO:0036094||GO:0043167||GO:0043168||GO:0097159||GO:0097367||GO:1901265||GO:1901363	protein kinase activity||ATP binding||molecular_function||catalytic activity||kinase activity||transferase activity||transferase activity, transferring phosphorus-containing groups||phosphotransferase activity, alcohol group as acceptor||catalytic activity, acting on a protein||nucleotide binding||binding||drug binding||purine nucleotide binding||adenyl nucleotide binding||ribonucleotide binding|…	--	--
CacGene00896	1321.06	3532.54	1.4188	1.39e-05	UP	-	sp|A8MQN2|LNK1_ARATH Protein LNK1 OS=Arabidopsis thaliana OX=3702 GN=LNK1 PE=1 SV=1	--	--	--	--	--	--	--	--
CacGene23616	118.669	755.618	2.6725	1.39e-05	UP	-	sp|Q9FMX6|DJC76_ARATH Chaperone protein dnaJ C76, chloroplastic OS=Arabidopsis thaliana OX=3702 GN=DJC76 PE=2 SV=1	--	--	--	--	--	--	--	--
novel.23	147.839	456.738	1.62554	1.4e-05	UP	-	sp|Q3L181|PERR_RAUSE Perakine reductase OS=Rauvolfia serpentina OX=4060 GN=PR PE=1 SV=1	--	--	--	--	--	--	--	--
CacGene14732	21.0066	0	-6.8237	1.4e-05	DOWN	-	-	--	--	--	--	--	--	--	--
CacGene01261	479.727	82.6115	-2.53632	1.41e-05	DOWN	PF05922:Peptidase inhibitor I9|PF00082:Subtilase family|PF17766:Fibronectin type-III domain	sp|O82777|SBT3_SOLLC Subtilisin-like protease SBT3 OS=Solanum lycopersicum OX=4081 GN=sbt3 PE=1 SV=1	GO:0006508||GO:0008152||GO:0006807||GO:0008150||GO:0019538||GO:0043170||GO:0044238||GO:0071704||GO:1901564	proteolysis||metabolic process||nitrogen compound metabolic process||biological_process||protein metabolic process||macromolecule metabolic process||primary metabolic process||organic substance metabolic process||organonitrogen compound metabolic process			GO:0004252||GO:0003674||GO:0003824||GO:0004175||GO:0008236||GO:0008233||GO:0070011||GO:0016787||GO:0017171||GO:0140096	serine-type endopeptidase activity||molecular_function||catalytic activity||endopeptidase activity||serine-type peptidase activity||peptidase activity||peptidase activity, acting on L-amino acid peptides||hydrolase activity||serine hydrolase activity||catalytic activity, acting on a protein	--	--
CacGene15612	501.031	185.017	-1.43691	1.42e-05	DOWN	PF13649:Methyltransferase domain|PF12756:C2H2 type zinc-finger (2 copies)	sp|Q0WVD6|ANM3_ARATH Probable protein arginine N-methyltransferase 3 OS=Arabidopsis thaliana OX=3702 GN=PRMT3 PE=2 SV=1	--	--	--	--	--	--	--	--
CacGene13383	4832.42	18207	1.91362	1.45e-05	UP	PF02347:Glycine cleavage system P-protein	sp|P49361|GCSPA_FLAPR Glycine dehydrogenase (decarboxylating) A, mitochondrial OS=Flaveria pringlei OX=4226 GN=GDCSPA PE=2 SV=1	GO:0006546||GO:0055114||GO:0001505||GO:0008152||GO:0006082||GO:0006520||GO:0006544||GO:0006807||GO:0008150||GO:0009056||GO:0009063||GO:0009069||GO:0009071||GO:0009987||GO:0016054||GO:0017144||GO:0019752||GO:0042133||GO:0042135||GO:0042737||GO:0043436||GO:0044237||GO:0044238||GO:0044248||GO:0044281||GO:0044282||GO:0046395||GO:0065007||GO:0065008||GO:0071704||GO:1901564||GO:1901565||GO:1901575||GO:…	glycine catabolic process||oxidation-reduction process||regulation of neurotransmitter levels||metabolic process||organic acid metabolic process||cellular amino acid metabolic process||glycine metabolic process||nitrogen compound metabolic process||biological_process||catabolic process||cellular amino acid catabolic process||serine family amino acid metabolic process||serine family amino acid cat…			GO:0004375||GO:0003674||GO:0003824||GO:0016491||GO:0016638||GO:0016642	glycine dehydrogenase (decarboxylating) activity||molecular_function||catalytic activity||oxidoreductase activity||oxidoreductase activity, acting on the CH-NH2 group of donors||oxidoreductase activity, acting on the CH-NH2 group of donors, disulfide as acceptor	egr00260||egr00630||egr01100||egr01110||egr01200	Glycine, serine and threonine metabolism||Glyoxylate and dicarboxylate metabolism||Metabolic pathways||Biosynthesis of secondary metabolites||Carbon metabolism
CacGene07927	328.357	721.653	1.13665	1.47e-05	UP	PF09177:Syntaxin 6, N-terminal	-	GO:0048193||GO:0016192||GO:0006810||GO:0008150||GO:0051179||GO:0051234	Golgi vesicle transport||vesicle-mediated transport||transport||biological_process||localization||establishment of localization	GO:0016020||GO:0005575	membrane||cellular_component			--	--
[truncated: 2,064 more rows]

## Sheet: Supplementary Table S4
Supplementary Table S4. Differential expression of genes between infected and noninfected C. acuminata at 16 WAI.
ID	C2	D16	log2FoldChange	P Vlue	regulated	Pfam	Swissprot	GO						KEGG
								biological_process	biological_process_description	cellular_component	cellular_component_description	molecular_function	molecular_function_description	pathway_id	pathway
[truncated: 3,681 more rows]

## Sheet: Supplementary Table S5
Supplementary Table S5. Differential expression of genes between infected and noninfected C. acuminata at 28 WAI.
[truncated: 3,372 more rows]

## Sheet: Supplementary Table S6
Supplementary Table S6. List of differentially expressed genes enriched for specific pathways in different WAI of terminal new leaves of CaWB-infected C. acuminata compared with controls.
[truncated: 402 more rows]

[truncated: 5 more sheets: Supplementary Table S7, Supplementary Table S8, Supplementary Table S9, Supplementary Table S10, Supplementary Table 11]
