# Supplementary material for: Combined Transcriptomic and Metabolomic Analyses of Defense Mechanisms against Phytoplasma Infection in Camptotheca acuminata Decne
Source: MDPI journal article supplement (doi:10.3390/agriculture13101943), 2023-10-05

**Supplementary Figure S2.** Symptoms of *C. acuminata* terminal leaves or infection leaves at different stages of infection by CaWB. A) 4 weeks after infesting (WAI); B) 10 WAI; C) 16 WAI; D) 20 WAI; E) 28 WAI; WAI, Week after infection.

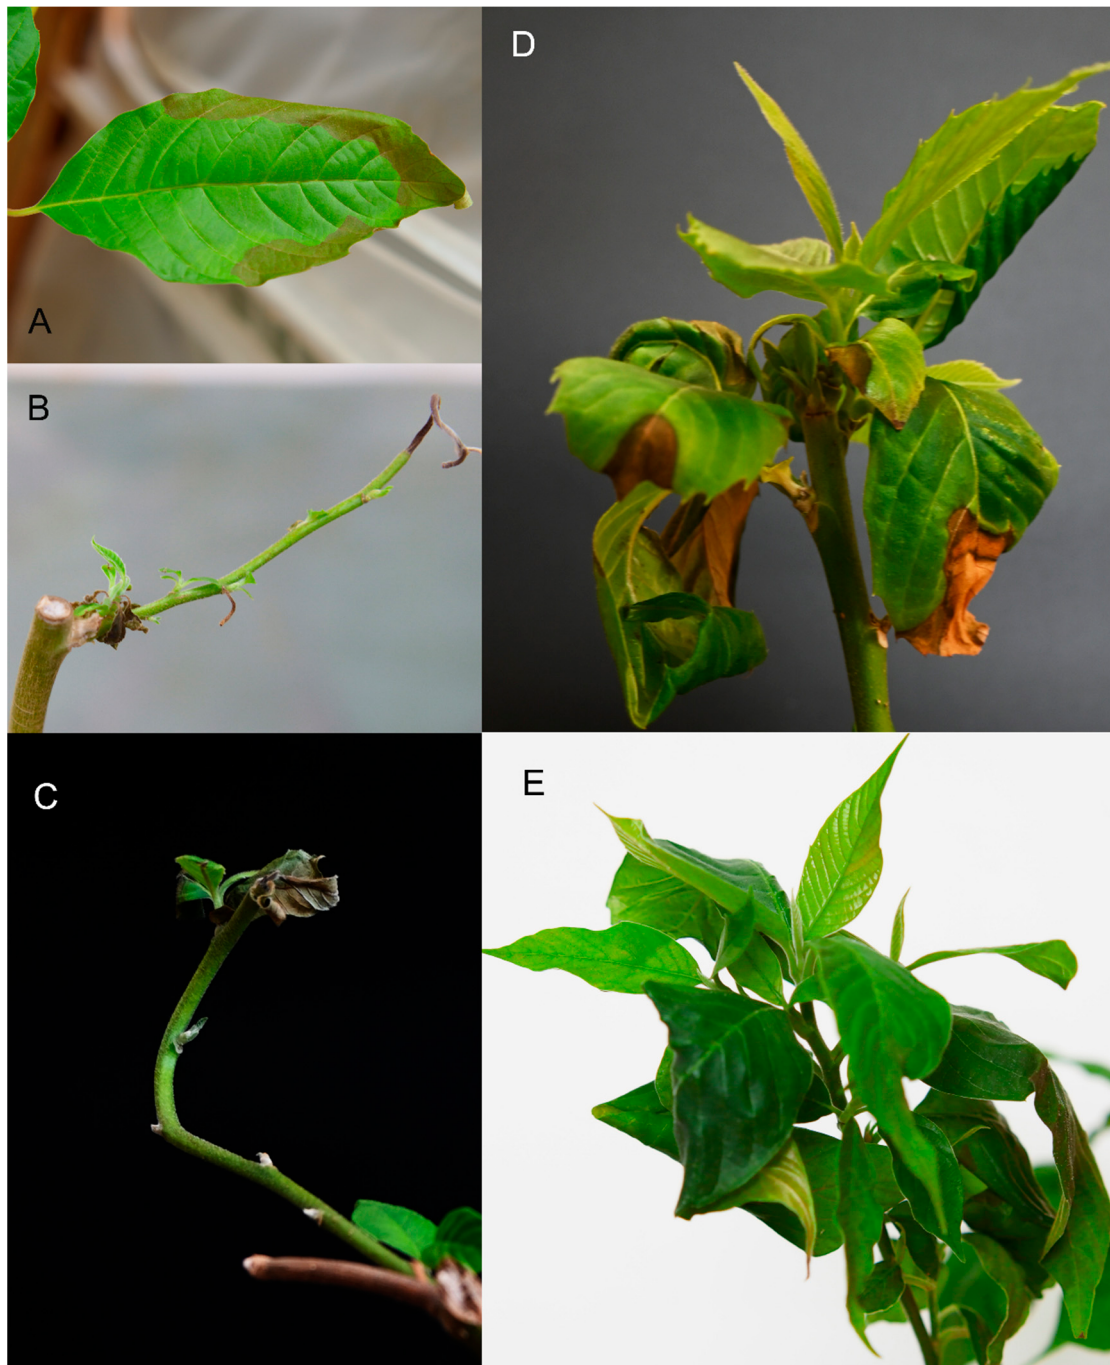

Supplement: s1 [file s1 › Additional file S2.pdf]
